# Supplementary material
Source: PubMed Central journal article supplement (PMC8564153)
Supplement: sj-pdf-1-eso-10.1177_23969873211039721.pdf [file sj-pdf-1-eso-10.1177_23969873211039721.pdf]

## **Supplements to “European Stroke Organization and European Society for Swallowing Disorders guideline for the diagnosis and treatment of post-stroke dysphagia”**

**Supplement 1: Summarizing tables with key results (p 2-24)**

**Supplement 2: Search strategies (p 25-29)**

**Supplement 3: Prisma-diagrams (p 30-33)**

**Supplement 4: Results of Meta-Analyses (34-178)**

- **Epidemiology (p 34- 43)**
- **Screening (p 44-52)**
- **Assessment (p 53-58)**
- **Treatment (59-)**
  - **Dietary Interventions (p 59-65)**
  - **Behavioural Interventions (p 66-98)**
  - **Acupuncture (p 99-105)**
  - **Nutritional Interventions (p 106-118)**
  - **Oral Health Interventions (p 119-127)**
  - **Pharmacological Interventions (p 128-153)**
  - **Neurostimulation Interventions (p 154-178)**

**Supplement 5: Risk of bias analysis (p 179-198)**

- **Epidemiology (p 179-180)**
- **Screening (p 181)**
- **Assessment (p 182)**
- **Treatment (p 183-199)**
  - **Dietary Interventions (p 183-184)**
  - **Behavioural Interventions (p 185-187)**
  - **Acupuncture (p 188-189)**
  - **Nutritional Interventions (p 190-191)**
  - **Oral Health Interventions (p 192-193)**
  - **Pharmacological Interventions (p 194-196)**
  - **Neurostimulation Interventions (p 197-198)**

**Supplement 6: GRADE profiles (p199-234)**

- **Epidemiology (p 199-201)**
- **Screening (p 202-205)**
- **Assessment (p 206-212)**
- **Treatment (213-234)**
  - **Dietary Interventions (p 213-216)**
  - **Behavioural Interventions (p 217-219)**
  - **Acupuncture (p 220-221)**
  - **Nutritional Interventions (p 222-225)**
  - **Oral Health Interventions (p 226-228)**

- **Pharmacological Interventions (p 229-231)**
- **Neurostimulation Interventions (p 232-234)**

**Supplement 1: Summarizing tables with key results****Table 1.** Grading of outcomes

| Scale | OUTCOME                                      | Same level Outcomes                           | DEFINITIONS                                                                      |
|-------|----------------------------------------------|-----------------------------------------------|----------------------------------------------------------------------------------|
| 9     | Mortality                                    | MRS                                           | Critical for making a decision (included in evidence profile)                    |
| 8     | Complications (Malnutrition)                 | Respiratory tract infection                   |                                                                                  |
| 7     | Aspiration risk                              | Feeding strategy                              |                                                                                  |
| 6     | Swallowing function                          |                                               |                                                                                  |
| 5     | Length of stay in hospital                   | Nutritional measures, Weight loss/muscle loss | important, but not critical for making a decision (included in evidence profile) |
| 4     | Quality of life                              |                                               |                                                                                  |
| 3     | Laboratory parameters linked to malnutrition |                                               |                                                                                  |
| 2     | Feeding tube failures and adverse events     | Withdrawal of tube feeding, Costs             | of limited importance for making a decision (not included in evidence profile)   |

**Table 2.** Effect of dysphagia compared to no dysphagia on key outcomes

| Outcome                                | Incidence (%)/ Mean±SD |              | Studies                                               | n (N)      | OR [95% CI]/<br>MD [95% CI] | I <sup>2</sup> | p value   |
|----------------------------------------|------------------------|--------------|-------------------------------------------------------|------------|-----------------------------|----------------|-----------|
|                                        | Dysphagia              | No dysphagia |                                                       |            |                             |                |           |
| <b>Mortality</b>                       |                        |              |                                                       |            |                             |                |           |
| • In-hospital                          | 19%                    | 1%           | 17, 30, 37, 41, 48, 49, 52, 55, 56 40, 55, 56         | 10(682884) | 9.77 [5.45, 17.50]          | 96%            | < 0.00001 |
| • 3-months                             | 16%                    | 1%           | 15, 17, 19, 32, 49, 51                                | 5(13546)   | 9.02 [4.50, 18.09]          | 73%            | < 0.00001 |
| • 1-year                               | 42%                    | 32%          | 20, 37, 46, 49-51, 54                                 | 7(10737)   | 8.82 [3.56, 21.85]          | 98%            | < 0.00001 |
| <b>Pneumonia</b>                       |                        |              |                                                       |            |                             |                |           |
|                                        | 22%                    | 3%           | 7, 15-18, 21, 22, 24-29, 34, 35, 37-43, 45-50, 52, 56 | 31(767179) | 7.45 [6.01, 9.24]           | 94%            | < 0.00001 |
| <b>Tube feeding</b>                    |                        |              |                                                       |            |                             |                |           |
| • Nasogastric tube                     | 41%                    | 1%           | 17, 37                                                | 2(8171)    | 93.74 [24.33, 361.14]       | 35%            | < 0.00001 |
| • Percutaneous feeding tube            | 9%                     | 0.1%         | 17, 26, 37, 47                                        | 4(8446)    | 71.60 [34.38, 149.11]       | 0%             | < 0.00001 |
| <b>mRS</b>                             |                        |              |                                                       |            |                             |                |           |
| • mRS 0, 1                             | 6%                     | 30%          | 17, 37                                                | 2(5582)    | 0.20 [0.11, 0.35]           | 83%            | < 0.00001 |
| • mRS ≥2                               | 76%                    | 55%          | 15, 17, 37, 48                                        | 3(17858)   | 2.34 [1.24, 4.40]           | 98%            | 0.08      |
| • mRS 4,5                              | 52%                    | 18%          | 37                                                    | 1(5012)    | 5.03 [4.43, 5.72]           | NA             | < 0.00001 |
| <b>LOS</b>                             |                        |              |                                                       |            |                             |                |           |
| • overall [days]                       | 12.1±9.7               | 8.4±6.2      | 7, 15, 17, 20, 23, 26, 30, 37, 40, 46-49, 56, 57, 126 | 14(697614) | 4.72 [3.53, 5.91]           | 99%            | < 0.00001 |
| • Stroke-unit [days]                   | 4.4±3.0                | 2.7±2.4      | 17                                                    | 1(570)     | 1.70 [1.12, 2.28]           | NA             | < 0.00001 |
| <b>Discharge status</b>                |                        |              |                                                       |            |                             |                |           |
| • Discharged home                      | 17%                    | 67%          | 17, 28, 37, 40, 47, 49, 56, 126                       | 8(678519)  | 0.17 [0.09, 0.35]           | 100%           | < 0.00001 |
| • Discharged to Institution/Palliative | 49%                    | 26%          | 7, 17, 37, 46-48, 51, 56                              | 7(665094)  | 3.90 [2.93, 5.21]           | 81%            | < 0.00001 |
| • Discharged to long term care         | 15%                    | 5%           | 37, 56                                                | 2(663721)  | 1.95 [0.71, 5.32]           | 100%           | 0.19      |
| • Readmission,                         | 42%                    | 54%          | 49                                                    | 1(395)     | 0.62 [0.42, NA]             | NA             | 0.02      |

|               |  |  |  |  |       |  |  |
|---------------|--|--|--|--|-------|--|--|
| <b>1 year</b> |  |  |  |  | 0.93] |  |  |
|---------------|--|--|--|--|-------|--|--|

CI: Confidence intervals; FOIS: Functional oral intake scale; I<sup>2</sup>: Heterogeneity; LOS, Length of stay in hospital; MD: Mean difference; n: Number of studies; N: Number of patients; NIHSS: National Institute of Health Stroke Scale; p: Statistical significance value; OR: Odds Ratio; SD: Standard deviation

**Table 3.** Effect of screening compared to no screening on key outcomes

| Outcome                            | Incidence (%)/<br>Mean±SD |                 | Studies                  | n (N)      | OR [95% CI]/<br>MD [95% CI] | I <sup>2</sup> | P value   |
|------------------------------------|---------------------------|-----------------|--------------------------|------------|-----------------------------|----------------|-----------|
|                                    | Screening                 | No<br>Screening |                          |            |                             |                |           |
| <b>Mortality</b>                   |                           |                 |                          |            |                             |                |           |
| • In-hospital                      | 2%                        | 4%              | 40, 71-73                | 4(20806)   | 0.67 [0.45, 1.02]           | 57%            | 0.06      |
| • 1 month                          | 10%                       | 31%             | 74, 76, 77               | 3(66162)   | 0.57 [0.12, 2.80]           | 99%            | 0.49      |
| <b>Pneumonia</b>                   |                           |                 | 15, 40, 47, 71-74, 76-80 |            |                             |                |           |
|                                    | 7%                        | 10%             | 47, 71, 73               | 11(536650) | 0.55 [0.36, 0.83]           | 99%            | 0.004     |
| <b>Nasogastric tube, insertion</b> |                           |                 | 47, 71, 73               |            |                             |                |           |
|                                    | 44%                       | 53%             |                          | 3(459)     | 0.86 [0.51, 1.45]           | 0%             | 0.58      |
| <b>Endotracheal tube insertion</b> |                           |                 | 71, 73                   |            |                             |                |           |
|                                    | 7%                        | 9%              |                          | 2(260)     | 0.66 [0.27, 1.63]           | 0%             | 0.37      |
| <b>LOS [days]</b>                  | 7.2±6.4                   | 6.2±5.3         | 40, 47, 71-73            | 5(21005)   | 0.02 [-2.22, 2.26]          | 99%            | 0.99      |
| <b>Discharge</b>                   |                           |                 |                          |            |                             |                |           |
| • Discharged home                  | 29%                       | 33%             | 40, 77                   | 2(20348)   | 0.84 [0.79, 0.90]           | 0%             | < 0.00001 |
| • Discharged to Institution        | 20%                       | 19%             | 77                       | 1(2334)    | 1.08 [0.86, 1.35]           | NA             | 0.53      |
| • Skilled nursing facility         | 14%                       | 11%             | 77                       | 1(2334)    | 1.27 [0.97, 1.66]           | NA             | 0.09      |
| • Hospice                          | 2%                        | 3%              | 77                       | 1(2334)    | 0.78 [0.43, 1.39]           | NA             | 0.39      |
| • Other hospitals                  | 6%                        | 5%              | 77                       | 1(2334)    | 1.28 [0.86, 1.92]           | NA             | 0.23      |

CI: Confidence intervals; I<sup>2</sup>: Heterogeneity; LOS, Length of stay in hospital; MD: Mean difference; n: Number of studies; N: Number of patients; p: Statistical significance value; OR: Odds Ratio; SD: Standard deviation; UTI: Urinary tract infection

**Table 4.** Effect of early screening compared to late screening on key outcomes

| Outcome                                   | Incidence (%)/<br>Mean±SD |                   | Studies                             | n (N)     | OR [95% CI]/<br>MD [95% CI] | I <sup>2</sup> | p value   |
|-------------------------------------------|---------------------------|-------------------|-------------------------------------|-----------|-----------------------------|----------------|-----------|
|                                           | Early<br>Screening        | Late<br>Screening |                                     |           |                             |                |           |
| <b>Mortality</b>                          |                           |                   |                                     |           |                             |                |           |
| • Overall                                 | 15%                       | 23%               | <sup>74, 81-84</sup>                | 7(144307) | 0.62 [0.43, 0.91]           | 99%            | 0.01      |
| • Hospital/ 7<br>days                     | 5%                        | 6%                | <sup>81-83</sup>                    | 4(55969)  | 0.74 [0.61, 0.89]           | 75%            | 0.002     |
| • 1 month                                 | 11%                       | 16%               | <sup>74, 83, 84</sup>               | 5(140614) | 0.66 [0.42, 1.02]           | 99%            | 0.06      |
| • 1 year                                  | 26%                       | 27%               | <sup>83</sup>                       | 2(52276)  | 0.94 [0.90, 0.97]           | 0%             | 0.0009    |
| <b>Pneumonia</b>                          |                           |                   |                                     |           |                             |                |           |
|                                           | 9%                        | 15%               | <sup>15, 74, 80-82,<br/>84-89</sup> | 10(96367) | 0.45 [0.35, 0.58]           | 83%            | < 0.00001 |
| <b>LOS, days</b>                          | 23.8±9.5                  | 27.6±9.2          | <sup>81-84, 90</sup>                | 6(56085)  | -2.27 [-3.12, -1.43]        | 92%            | < 0.00001 |
| <b>Barthel Index<br/>Score, discharge</b> | 17±43                     | 12±28             | <sup>84</sup>                       | 1(116)    | 5.00 [-8.21, 18.21]         | NA             | 0.46      |
| <b>Discharge</b>                          |                           |                   |                                     |           |                             |                |           |
| • Discharged<br>home                      | 57%                       | 53%               | <sup>83</sup>                       | 2(52276)  | 1.16 [1.08, 1.26]           | 79%            | < 0.0001  |
| • Readmission                             | 2%                        | 6%                | <sup>85</sup>                       | 1(138)    | 0.35 [0.06, 2.19]           | NA             | 0.69      |
| <b>mRS</b>                                |                           |                   |                                     |           |                             |                |           |
| • mRS, 4-5                                | 28%                       | 39%               | <sup>81</sup>                       | 1(3309)   | 0.59 [0.50, 0.71]           | NA             | 0.00001   |

CI: Confidence intervals; I<sup>2</sup>: Heterogeneity; LOS, Length of stay in hospital; MD: Mean difference; n: Number of studies; N: Number of patients; p: Statistical significance value; PEG: Percutaneous endoscopic gastrostomy; OR: Odds Ratio; SD: Standard deviation; LOS: Length of stay

**Table 5.** Effect of clinical bedside assessment compared to instrumental assessment on key outcomes

| Outcome                                | Incidence (%)                     |                            | Studies        | n (N)  | OR [95% CI] /<br>MD [95% CI] | I <sup>2</sup> | p value |
|----------------------------------------|-----------------------------------|----------------------------|----------------|--------|------------------------------|----------------|---------|
|                                        | Clinical<br>bedside<br>assessment | Instrumental<br>assessment |                |        |                              |                |         |
| <b>Mortality</b>                       | 10.5%                             | 7.3%                       | <sup>135</sup> | 1(440) | 1.49 [0.76, 2.90]            | NA             | 0.24    |
| <b>Pneumonia</b>                       | 12.3%                             | 6.4%                       | <sup>135</sup> | 1(440) | 2.06 [1.05, 4.04]            | NA             | 0.04    |
| <b>Discharge,<br/>home</b>             | 43.6%                             | 46.4%                      | <sup>135</sup> | 1(440) | 0.90 [0.62, 1.30]            | NA             | 0.57    |
| <b>Discharge, on<br/>standard diet</b> | 51.1%                             | 65.6%                      | <sup>135</sup> | 1(378) | 0.47 [0.31, 0.71]            | NA             | 0.004   |
| <b>LOS [days]</b>                      | 17.3±15.2                         | 23.7±20.2                  | <sup>135</sup> | 1(440) | -6.33 [-9.67, -2.99]         | NA             | 0.0002  |

CI: Confidence intervals; I<sup>2</sup>: Heterogeneity; LOS: Length of stay in hospital; n: Number of studies; N: Number of patients; NA: Not applicable; p: Statistical significance value; OR: Odds Ratio

**Table 6.** Effect of instrumental assessment with FEES compared to instrumental assessment with VFSS on key outcomes.

| Outcome          | Incidence (%) |       | Studies        | n (N) | OR [95% CI]/<br>MD [95% CI] | I <sup>2</sup> | P value |
|------------------|---------------|-------|----------------|-------|-----------------------------|----------------|---------|
|                  | VFSS          | FEES  |                |       |                             |                |         |
| <b>Pneumonia</b> | 29.2%         | 4.8%  | <sup>140</sup> | 1(45) | 8.24 [0.92, 73.79]          | NA             | 0.06    |
| <b>PEG</b>       | 2.6%          | 23.8% | <sup>140</sup> | 1(99) | 0.08 [0.01, 0.47]           | NA             | 0.005   |

CI: Confidence intervals; FEES: fiberoptic endoscopic evaluation of swallowing; I<sup>2</sup>: Heterogeneity; n: Number of studies; N: Number of patients; NA: Not applicable; p: Statistical significance value; PEG: Percutaneous endoscopic gastrostomy; OR: Odds Ratio

**Table 7.** Effect of complementary and standard assessment in patients with acute or subacute stroke

| Outcome                      | Incidence (%)/ Mean±SD                |                     | Studies        | n (N)  | OR [95% CI]/<br>MD [95% CI] | I <sup>2</sup> | p value |
|------------------------------|---------------------------------------|---------------------|----------------|--------|-----------------------------|----------------|---------|
|                              | Complementary and standard assessment | Standard assessment |                |        |                             |                |         |
| <b>Mortality</b>             | 13.5%                                 | 19.6%               | <sup>141</sup> | 1(311) | 0.64 [0.35, 1.18]           | NA             | 0.15    |
| <b>Pneumonia</b>             | 25.7%                                 | 21.5%               | <sup>141</sup> | 1(311) | 1.26 [0.75, 2.14]           | NA             | 0.38    |
| <b>Independence</b>          |                                       |                     |                |        |                             |                |         |
| • <b>At home</b>             | 48.6%                                 | 44.8%               | <sup>141</sup> | 1(311) | 1.17 [0.75, 1.83]           | NA             | 0.50    |
| • <b>At residential care</b> | 43.2%                                 | 45.4%               | <sup>141</sup> | 1(311) | 0.92 [0.59, 1.43]           | NA             | 0.70    |
| • <b>At public hospital</b>  | 8.1%                                  | 9.8%                | <sup>141</sup> | 1(311) | 0.81 [0.37, 1.78]           | NA             | 0.60    |
| <b>Length of stay</b>        | 7±5.2                                 | 6±5.2               | <sup>141</sup> | 1(311) | 1.00 [-0.16, 2.16]          | NA             | 0.09    |
| <b>FOIS</b>                  | 6.2±1.2                               | 6±1.3               | <sup>141</sup> | 1(311) | 0.20 [-0.08, 0.48]          | NA             | 0.16    |

CI: Confidence intervals; I<sup>2</sup>: Heterogeneity; MD: Mean difference; n: Number of studies; N: Number of patients; NA: Not applicable; p: Statistical significance value; OR: Odds Ratio; SD: Standard deviation; FOIS: Functional oral intake scale

**Table 8.** Effect of consistency modification on key outcomes

| Outcome                                   | Incidence %                 |           | Studies                     | n (N)  | RR [95% CI]/<br>MD [95% CI]    | I <sup>2</sup> | p value |
|-------------------------------------------|-----------------------------|-----------|-----------------------------|--------|--------------------------------|----------------|---------|
|                                           | Consistency<br>modification | Control   |                             |        |                                |                |         |
| <b>Pneumonia</b>                          |                             |           |                             |        |                                |                |         |
| • RCT                                     | 0.0%                        | 20.0%     | <sup>154, 156,</sup><br>158 | 4(100) | 0.19 [0.03, 1.40]              | 0%             | 0.1     |
| <b>Penetration</b>                        |                             |           |                             |        |                                |                |         |
| • RCT                                     | 0.0%                        | 13.1%     | <sup>153</sup>              | 1(122) | 0.06 [0.00, 1.00]              | NA             | 0.05    |
| <b>Aspiration</b>                         |                             |           |                             |        |                                |                |         |
| • RCT                                     | 21.3%                       | 45.7%     | <sup>153-155</sup>          | 3(188) | 0.51 [0.14, 1.77]              | 90%            | 0.29    |
| <b>LOS in hospital<br/>(days)</b>         |                             |           |                             |        |                                |                |         |
| • RCT                                     | 24±9                        | 34±12     | <sup>158</sup>              | 1(64)  | -9.58 [-15.41, -<br>3.76]      | 19%            | 0.001   |
| <b>Fluid intake (ml)</b>                  |                             |           |                             |        |                                |                |         |
| • Overall                                 | 1179±235                    | 1612±455  | <sup>156, 157,</sup><br>160 | 3(77)  | -133.22 [-541.90,<br>275.46]   | 94%            | 0.52    |
| • RCT                                     | 745±164                     | 649±172   | <sup>156, 157</sup>         | 2(38)  | 140.48 [-41.56,<br>322.51]     | 68%            | 0.13    |
| • NRCT                                    | 1589±302                    | 2575±737  | <sup>160</sup>              | 1(39)  | -986.00 [-1330.71,<br>-641.29] | NA             | <0.0001 |
| • <b>Energy intake,<br/>Kcal/kg/day</b>   |                             |           |                             |        |                                |                |         |
| • NRCT                                    | 19.4±6.2                    | 22.3±9.0  | <sup>161</sup>              | 1(52)  | -2.90 [-7.09, 1.29]            | NA             | 0.18    |
| • <b>Protein<br/>intake,<br/>g/kg/day</b> |                             |           |                             |        |                                |                |         |
| • NRCT                                    | 0.71±0.29                   | 0.90±0.31 | <sup>161</sup>              | 1(68)  | -0.19 [-0.34, -<br>0.04]       | NA             | 0.02    |

CI: Confidence intervals; I<sup>2</sup>: Heterogeneity; MD: Mean difference; n: Number of studies; N: Number of patients; p: Statistical significance value; RR: Risk Ratio; SD: Standard deviation; RCT: Randomized controlled trial; NRCT: Non-Randomized Controlled Trial



**Table 9.** Effect of behavioural therapy on key outcomes and dysphagia scores

| Outcome                                    | Mean±SD/ Incidence (%) |           | Studies                                                     | n (N)   | RR [95% CI]/<br>MD [95% CI] | I <sup>2</sup> | P value  |
|--------------------------------------------|------------------------|-----------|-------------------------------------------------------------|---------|-----------------------------|----------------|----------|
|                                            | Behaviour              | Control   |                                                             |         |                             |                |          |
| <b>Mortality</b>                           |                        |           |                                                             |         |                             |                |          |
| • RCT                                      | 15.1%                  | 10.7%     | 25, 170, 171                                                | 3(505)  | 1.47 [0.32,<br>6.78]        | 71%            | 0.62     |
| <b>mRS, RCT</b>                            |                        |           |                                                             |         |                             |                |          |
| • mRS ≥3                                   | 50.5%                  | 48.0%     | 171                                                         | 1(306)  | 1.05 [0.82,<br>1.34]        | NA             | 0.69     |
| <b>Pneumonia</b>                           |                        |           |                                                             |         |                             |                |          |
| • Overall                                  | 18.4%                  | 24.5%     | 25, 170, 171,<br>173, 183, 184                              | 6(677)  | 0.57 [0.43,<br>0.75]        | 0%             | < 0.0001 |
| • EMST, RCT                                | 11.6%                  | 19.0%     | 173, 183, 184                                               | 3(196)  | 0.58 [0.24,<br>1.41]        | 22%            | 0.23     |
| • Swallowing<br>exercises, RCT             | 21.3%                  | 26.6%     | 25, 170, 171                                                | 3(481)  | 0.56 [0.41,<br>0.76]        | 0%             | 0.0002   |
| <b>LOS</b>                                 |                        |           |                                                             |         |                             |                |          |
| • Swallowing<br>exercise, RCT              | 19.2±1.2               | 21.4±12.4 | 171                                                         | 1(306)  | -2.20 [-4.61,<br>0.21]      | NA             | 0.07     |
| <b>Tube feeding</b>                        |                        |           |                                                             |         |                             |                |          |
| • Tube removal                             | 63.6%                  | 28.6%     | 193, 194                                                    | 2(43)   | 2.16 [0.75,<br>6.17]        | 43%            | 0.15     |
| <b>Improvement in<br/>dysphagia scores</b> |                        |           |                                                             |         |                             |                |          |
| • Overall                                  | 6.4±3.6                | 4.1±3.5   | 101, 165, 172,<br>173, 175-177,<br>181, 185-190,<br>192-194 | 18(510) | 1.18 [0.78,<br>1.57]        | 70%            | <0.00001 |
| • RCT                                      | 5.0±2.9                | 3.0±2.8   | 101, 165, 172,<br>173, 175-177,<br>181, 185-190,<br>192     | 16(440) | 0.97 [0.64,<br>1.30]        | 68%            | <0.00001 |
| • EMST, RCT                                | 1.4±1.3                | 0.7±1.4   | 165, 172, 173,<br>185                                       | 4(108)  | 0.99 [0.51,<br>1.47]        | 16%            | < 0.0001 |
| • Swallowing<br>exercises, overall         | 7.6±4.2                | 5.1±4.1   | 101, 175-177,<br>181, 186-190,<br>192-194                   | 14(402) | 1.01 [0.67,<br>1.34]        | 73%            | <0.00001 |
| • Swallowing<br>exercises, RCT             | 6.1±3.4                | 3.9±3.3   | 101, 175-177,<br>181, 186-190,<br>192                       | 12(332) | 1.19 [0.68,<br>1.69]        | 73%            | <0.00001 |
| • Swallowing<br>exercises, NRCT            | 15.5±8.4               | 10.5±7.3  | 193, 194                                                    | 2(70)   | 3.11 [-0.12,<br>6.34]       | 40%            | 0.06     |

CI: Confidence intervals;  $I^2$ , p: Heterogeneity; n: Number of studies; N: Number of patients; NA: Not applicable; NRCT: Non-randomized controlled trial; p: Statistical significance value; SD: Standard Deviation; MD: Mean Difference; RR: Risk Ratio; EMST: Expiratory muscle strength training; RCT: Randomized controlled trial; NRCT: Non-Randomized Controlled Trial

**Table 10.** Effect of acupuncture on key outcomes

| Outcome                           | Mean±SD/ Incidence (%) |         | Studies                            | n (N)    | RR [95% CI]/<br>(S)MD [95% CI] | $I^2$ | p value   |
|-----------------------------------|------------------------|---------|------------------------------------|----------|--------------------------------|-------|-----------|
|                                   | Acupuncture            | Control |                                    |          |                                |       |           |
| <b>Dysphagia at end of trial</b>  | 20.0%                  | 39.6%   | 196 198-208, 210-214, 216, 218-222 | 23(2177) | 0.51 [0.41, 0.63]              | 58%   | < 0.00001 |
| <b>Dysphagia score, overall*</b>  |                        |         |                                    |          |                                |       |           |
| • Improvement                     | 4.0±0.8                | 2.8±0.9 | 197, 199, 217                      | 3(292)   | 1.05 [0.45, 1.65]              | 81%   | 0.0006    |
| • Post intervention               | 1.5±0.7                | 2.1±0.9 | 197, 199, 208, 212, 217            | 5(443)   | -0.63 [-1.12, -0.14]           | 84%   | 0.01      |
| <b>Pneumonia</b>                  | 3.3%                   | 8.3%    | 200                                | 1(120)   | 0.40 [0.08, 1.98]              | NA    | 0.26      |
| <b>SQoL</b>                       | 197±19                 | 165±20  | 200                                | 1(120)   | 32.0 [24.99, 39.01]            | NA    | <0.00001  |
| <b>Nasal feeding tube removal</b> | 89.5%                  | 50.0%   | 198                                | 1(74)    | 1.79 [1.27, 2.53]              | NA    | 0.0009    |
| <b>BI</b>                         | 78±11                  | 63±12   | 209, 217                           | 2(140)   | 7.40 [-12.39, 27.19]           | 95%   | 0.46      |
| <b>Adverse effects</b>            |                        |         |                                    |          |                                |       |           |
| • Pain                            | 1.7%                   | 0.0%    | 217                                | 1(120)   | 3.00 [0.12, 72.20]             | NA    | 0.5       |
| • Hematoma                        | 3.3%                   | 0.0%    | 217                                | 1(120)   | 5.00 [0.25, 102.00]            | NA    | 0.3       |
| • Discomfort                      | 11.7%                  | 8.3%    | 217                                | 1(120)   | 1.40 [0.47, 4.17]              | NA    | 0.55      |

\*: Standard Mean Difference; CI: Confidence intervals;  $I^2$ : Heterogeneity; n: Number of studies; N: Number of patients; NA: Not applicable; p: Statistical significance value; SD: Standard Deviation; MD: Mean Difference; SQoL: Swallowing quality of life; RR: Risk ratio; BI: Barthel Index; RCT: Randomized controlled trial; NRCT: Non-Randomized Controlled Trial

**Table 11.** Effect of early compared to late initiation of oral nutritional therapy on key outcomes

| Outcome | Incidence (%) | Studies | n (N) | RR [95% CI]/ | $I^2$ | p value |
|---------|---------------|---------|-------|--------------|-------|---------|
|---------|---------------|---------|-------|--------------|-------|---------|

|                             | Early nutrition | Late nutrition |                     |         | <i>MD [95% CI]</i> |     |      |
|-----------------------------|-----------------|----------------|---------------------|---------|--------------------|-----|------|
| <b>Mortality</b>            |                 |                |                     |         |                    |     |      |
| • RCT                       | 11.7%           | 12.6%          | <sup>223-226</sup>  | 4(4337) | 0.88 [0.57, 1.37]  | 26% | 0.57 |
| <b>Pneumonia</b>            |                 |                |                     |         |                    |     |      |
| • RCT                       | 6.4%            | 5.8%           | <sup>223</sup>      | 1(4023) | 1.12 [0.88, 1.42]  | NA  | 0.38 |
| <b>mRS, RCT</b>             |                 |                |                     |         |                    |     |      |
| <b>mRS, 0, 1</b>            | 23.4%           | 23.5%          | <sup>223</sup>      | 1(4023) | 1.00 [0.89, 1.11]  | NA  | 0.94 |
| <b>mRS, 0-2</b>             | 40.4%           | 41.1%          | <sup>223</sup>      | 1(4023) | 0.98 [0.91, 1.06]  | NA  | 0.68 |
| <b>Recurrent stroke</b>     |                 |                |                     |         |                    |     |      |
| • RCT                       | 2.5%            | 2.1%           | <sup>223</sup>      | 1(4023) | 1.16 [0.77, 1.73]  | NA  | 0.48 |
| <b>Infections</b>           |                 |                |                     |         |                    |     |      |
| • RCT                       | 8.5%            | 10.0%          | <sup>223</sup>      | 1(4023) | 0.86 [0.71, 1.04]  | NA  | 0.12 |
| <b>Pressure sores</b>       |                 |                |                     |         |                    |     |      |
| • RCT                       | 0.7%            | 1.3%           | <sup>223</sup>      | 1(4023) | 0.57 [0.31, 1.08]  | NA  | 0.09 |
| <b>GIT haemorrhage</b>      |                 |                |                     |         |                    |     |      |
| • RCT                       | 1.4%            | 0.9%           | <sup>223</sup>      | 1(4023) | 1.55 [0.86, 2.79]  | NA  | 0.15 |
| <b>Length of stay, days</b> |                 |                |                     |         |                    |     |      |
| • RCT                       | 31.1±46.5       | 31.4±43.2      | <sup>223-226</sup>  | 4(4289) | 0.93 [-1.05, 2.91] | 0%  | 0.36 |
| <b>Weight, change, kg</b>   |                 |                |                     |         |                    |     |      |
| • RCT                       | 0.0±1.7         | -1.1±2.1       | <sup>225-227</sup>  | 4(315)  | 1.03 [0.17, 1.89]  | 91% | 0.02 |
| <b>Energy, kJ/kg</b>        |                 |                |                     |         |                    |     |      |
| • RCT                       | 61.6±20.8       | 49.7±15.0      | <sup>225, 227</sup> | 5(264)  | 8.25 [1.97, 14.53] | 81% | 0.01 |
| <b>Protein intake, g/kg</b> |                 |                |                     |         |                    |     |      |
| • RCT                       | 0.9±0.3         | 0.7±0.3        | <sup>225, 227</sup> | 5(264)  | 0.21 [0.01, 0.41]  | 88% | 0.04 |

CI: Confidence intervals;  $I^2$ , p: Heterogeneity; n: Number of studies; N: Number of patients; MD: Mean difference; NA: Not applicable; p: Statistical significance value; RR: Risk Ratio; GIT: Gastrointestinal tract; RR: Risk ratio; RCT: Randomized controlled trial; NRCT: Non-Randomized Controlled Trial

**Table 12.** Effect of early compared to late or restrictive enteral or parenteral nutrition therapy on key outcomes

| Outcome                                          | Incidence (%)                     |                                                  | Studies             | n (N)   | RR [95% CI]/<br>MD [95% CI] | I <sup>2</sup> | p value |
|--------------------------------------------------|-----------------------------------|--------------------------------------------------|---------------------|---------|-----------------------------|----------------|---------|
|                                                  | Early<br>Enteral or<br>Parenteral | Late/<br>Restrictive<br>Enteral or<br>Parenteral |                     |         |                             |                |         |
| <b>Mortality</b>                                 |                                   |                                                  |                     |         |                             |                |         |
| • RCT                                            | 42.4%                             | 48.1%                                            | <sup>229</sup>      | 1(859)  | 0.88 [0.76, 1.02]           | NA             | 0.09    |
| <b>Pneumonia</b>                                 |                                   |                                                  |                     |         |                             |                |         |
| • RCT                                            | 28.4%                             | 29.5%                                            | <sup>229, 230</sup> | 2(1005) | 0.97 [0.80, 1.17]           | 0%             | 0.75    |
| <b>MRS (RCT)</b>                                 |                                   |                                                  |                     |         |                             |                |         |
| • mRS, 0, 1                                      | 5.7%                              | 7.0%                                             | <sup>229, 230</sup> | 2(981)  | 0.84 [0.36, 1.94]           | 65%            | 0.68    |
| • mRS, 0-2                                       | 9.3%                              | 10.2%                                            | <sup>229</sup>      | 1(859)  | 0.91 [0.61, 1.37]           | NA             | 0.65    |
| <b>Recurrent stroke</b>                          |                                   |                                                  |                     |         |                             |                |         |
| • RCT                                            | 3.5%                              | 5.3%                                             | <sup>229</sup>      | 1(859)  | 0.65 [0.35, 1.24]           | NA             | 0.19    |
| <b>Infections</b>                                |                                   |                                                  |                     |         |                             |                |         |
| • RCT                                            | 23.8%                             | 27.3%                                            | <sup>229, 230</sup> | 2(1005) | 0.80 [0.55, 1.18]           | 65%            | 0.27    |
| <b>Pressure sores</b>                            |                                   |                                                  |                     |         |                             |                |         |
| • RCT                                            | 2.8%                              | 2.3%                                             | <sup>229</sup>      | 1(859)  | 1.20 [0.53, 2.75]           | NA             | 0.66    |
| <b>Malnutrition</b>                              |                                   |                                                  |                     |         |                             |                |         |
| • RCT                                            | 27.1%                             | 48.3%                                            | <sup>230</sup>      | 1(128)  | 0.56 [0.35, 0.90]           | NA             | 0.02    |
| <b>GIT haemorrhage</b>                           |                                   |                                                  |                     |         |                             |                |         |
| • RCT                                            | 5.1%                              | 2.6%                                             | <sup>229</sup>      | 1(859)  | 2.00 [0.98, 4.08]           | NA             | 0.06    |
| <b>Length of stay, days</b>                      |                                   |                                                  |                     |         |                             |                |         |
| • RCT                                            | 45±58                             | 44±50                                            | <sup>229</sup>      | 1(859)  | 1.00 [-6.24, 8.24]          | NA             | 0.79    |
| <b>BI</b>                                        |                                   |                                                  |                     |         |                             |                |         |
| • RCT                                            | 46.7±8.8                          | 44.4±9.3                                         | <sup>230</sup>      | 1(146)  | 2.30 [-0.64, 5.24]          | NA             | 0.13    |
| <b>Living at home</b>                            |                                   |                                                  |                     |         |                             |                |         |
| • RCT                                            | 35.7%                             | 31.6%                                            | <sup>229</sup>      | 1(859)  | 1.13 [0.93, 1.36]           | NA             | 0.21    |
| <b>Living in Rehabilitation/<br/>institution</b> |                                   |                                                  |                     |         |                             |                |         |
| • RCT                                            | 21.9%                             | 20.0%                                            | <sup>229</sup>      | 1(859)  | 1.10 [0.84, 1.42]           | NA             | 0.49    |
| <b>Nasogastric tube</b>                          |                                   |                                                  |                     |         |                             |                |         |
| • RCT                                            | 7.0%                              | 5.3%                                             | <sup>229</sup>      | 1(859)  | 1.31 [0.77, 2.21]           | NA             | 0.32    |
| <b>PEG</b>                                       |                                   |                                                  |                     |         |                             |                |         |
| • RCT                                            | 3.3%                              | 2.3%                                             | <sup>229</sup>      | 1(859)  | 1.40 [0.63, 3.12]           | NA             | 0.41    |

CI: Confidence intervals; I<sup>2</sup>, p: Heterogeneity; n: Number of studies; N: Number of patients; MD: Mean difference; NA: Not applicable; p: Statistical significance value; RR: Risk Ratio; BI: Barthel Index; RCT: Randomized controlled trial; NRCT: Non-Randomized Controlled Trial

**Table 13.** Effects of oral health interventions on key outcomes

| Outcome                          | Incidence % |           | Studies                 | n (N)    | RR [95% CI]/<br>(S)MD [95% CI] | I <sup>2</sup> | p value  |
|----------------------------------|-------------|-----------|-------------------------|----------|--------------------------------|----------------|----------|
|                                  | Oral health | Control   |                         |          |                                |                |          |
| <b>Mortality</b>                 |             |           |                         |          |                                |                |          |
| • Overall                        | 17.4%       | 29.8%     | <sup>84, 238</sup>      | 3(349)   | 0.66 [0.45, 0.96]              | 0%             | 0.03     |
| • RCT                            | 8.7%        | 14.0%     | <sup>238</sup>          | 1(203)   | 0.62 [0.28, 1.38]              | NA             | 0.24     |
| • NRCT                           | 32.8%       | 47.7%     | <sup>84</sup>           | 2(146)   | 0.67 [0.44, 1.03]              | 0%             | 0.07     |
| <b>In-patients</b>               |             |           |                         |          |                                |                |          |
| • RCT                            | 8.7%        | 11.0%     | <sup>238</sup>          | 1(203)   | 0.79 [0.34, 1.83]              | NA             | 0.59     |
| <b>1 month</b>                   |             |           |                         |          |                                |                |          |
| • RCT                            | NR          | NR        |                         | NR       | NR                             | NR             | NR       |
| • NRCT                           | 12.1%       | 25.0%     | <sup>84</sup>           | 2(146)   | 0.48 [0.22, 1.05]              | 0%             | 0.07     |
| <b>3 months</b>                  |             |           |                         |          |                                |                |          |
| • RCT                            | 8.7%        | 14.0%     | <sup>238</sup>          | 1(203)   | 0.62 [0.28, 1.38]              | NA             | 0.24     |
| <b>6 months</b>                  |             |           |                         |          |                                |                |          |
| • RCT                            | NR          | NR        |                         | NR       | NR                             | NR             | NR       |
| • NRCT                           | 32.8%       | 47.7%     | <sup>84</sup>           | 2(146)   | 0.67 [0.44, 1.03]              | 0%             | 0.07     |
| <b>Pneumonia</b>                 |             |           |                         |          |                                |                |          |
| • Overall                        | 8.7%        | 13.9%     | <sup>84, 238-242</sup>  | 7(2110)  | 0.39 [0.17, 0.91]              | 53%            | 0.03     |
| • RCT                            | 0.6%        | 5.6%      | <sup>238-240</sup>      | 3(284)   | 0.14 [0.02, 1.11]              | NA             | 0.06     |
| • NRCT                           | 10.0%       | 15.2%     | <sup>84, 241, 242</sup> | 4(1826)  | 0.47 [0.21, 1.06]              | 51%            | 0.07     |
| <b>Tube feeding</b>              |             |           |                         |          |                                |                |          |
| • Overall                        | 18.1%       | 29.1%     | <sup>84, 237, 242</sup> | 4(1853)  | 0.62 [0.48, 0.79]              | 36%            | 0.0001   |
| • RCT                            | 41.4%       | 100.0%    | <sup>84, 237, 242</sup> | 1 (51)   | 0.43 [0.28, 0.65]              | NA             | < 0.0001 |
| • NRCT                           | 17.5%       | 27.2%     | <sup>84, 242</sup>      | 3 (1802) | 0.68 [0.57, 0.81]              | 0%             | < 0.0001 |
| <b>Length of stay</b>            |             |           |                         |          |                                |                |          |
| • RCT                            | NR          | NR        |                         | NR       | NR                             | NR             | NR       |
| • NRCT                           | 11.7±9.7    | 16.8±7.6  | <sup>84, 243</sup>      | 2(200)   | -3.21 [-5.26, -1.16]           | 0%             | 0.002    |
| • <b>Oral Health</b>             |             |           |                         |          |                                |                |          |
| • Overall*                       | NA          | NA        | <sup>237, 239-241</sup> | 6(235)   | -1.27 [-2.26, -0.28]           | 93%            | 0.01     |
| • <b>Plaque index</b>            |             |           |                         |          |                                |                |          |
| • RCT                            | 1.4±1.5     | 7.4±2.6   | <sup>239, 240</sup>     | 3(175)   | -2.98 [-4.98, -0.98]           | 98%            | 0.003    |
| • <b>Gingival bleeding index</b> |             |           |                         |          |                                |                |          |
| • RCT                            | 8.7±9.3     | 17.7±21.9 | <sup>240</sup>          | 2(81)    | -8.85 [-17.77, 0.07]           | 27%            | 0.05     |

I<sup>2</sup>: Heterogeneity; MD: Mean difference; n: Number of studies; N: Number of patients; RR: Risk ratio; RCT: Randomized controlled trial; NRCT: Non-Randomized Controlled Trial

**Table 14:** Effect of different pharmaceutical agents on key outcomes

| Outcome                                        | Incidence %    |                | Studies                                 | n (N)              | RR [95% CI],<br>MD [95% CI]                    | I <sup>2</sup> | P value        |
|------------------------------------------------|----------------|----------------|-----------------------------------------|--------------------|------------------------------------------------|----------------|----------------|
|                                                | Drugs          | Control        |                                         |                    |                                                |                |                |
| <b>Mortality</b>                               |                |                |                                         |                    |                                                |                |                |
| ACE inhibitors                                 |                |                |                                         |                    |                                                |                |                |
| • Overall                                      | 10.3%          | 10.5%          | 257, 258,<br>268, 275                   | 4(6733)            | 0.96 [0.54,<br>1.69]                           | 75%            | 0.88           |
| • RCTs: vs Control                             | 10.6%          | 11.0%          | 257, 258, 268                           | 3(6244)            | 0.97 [0.46,<br>2.04]                           | 83%            | 0.93           |
| • NRCT: vs Control                             | 4.8%           | 5.6%           | 275                                     | 1(489)             | 0.86 [0.37,<br>1.99]                           | NA             | 0.72           |
| TRPV-agonists: RCT                             | 0.0%           | 2.9%           | 254                                     | 1(70)              | 0.33 [0.01,<br>7.91]                           | NA             | 0.5            |
| Dopaminergic drugs:<br>RCT                     | 15.2%          | 42.9%          | 257                                     | 1(68)              | 0.35 [0.14,<br>0.86]                           | NA             | 0.02           |
| Antibiotics: RCTs                              | 16.1%          | 15.3%          | 250, 252,<br>255, 256,<br>263, 264, 266 | 7(4301)            | 1.05 [0.87,<br>1.26]                           | 16%            | 0.61           |
| Metoclopramide: RCT                            | 26.7%          | 40.0%          | 265                                     | 1(60)              | 0.67 [0.32,<br>1.39]                           | NA             | 0.28           |
| <b>Pneumonia</b>                               |                |                |                                         |                    |                                                |                |                |
| ACE inhibitors                                 |                |                |                                         |                    |                                                |                |                |
| • Overall                                      | 4.1%           | 7.6%           | 258, 260,<br>271-275, 278,<br>279       | 12(106<br>11)      | 0.60 [0.51,<br>0.70]                           | 61%            | < 0.00001      |
| • RCTs vs control<br>(fatal)                   | 4.4%<br>(2.2%) | 5.2%<br>(2.2%) | 258, 260                                | 2(6176)<br>2(6176) | 0.86 [0.69,<br>1.06]<br>(1.02 [0.74,<br>1.42]) | 61%<br>(79%)   | 0.16<br>(0.89) |
| • NRCTs vs control                             | 3.6%           | 11.4%          | 271, 274,<br>275, 278                   | 4(1491)            | 0.41 [0.26,<br>0.64]                           | 0%             | < 0.0001       |
| • NRCTs: vs other<br>antihypertensive<br>drugs | 3.9%           | 10.6%          | 271-274, 279                            | 6(2944)            | 0.38 [0.28,<br>0.52]                           | 0%             | < 0.00001      |
| TRPV-agonists                                  |                |                |                                         |                    |                                                |                |                |
| • Overall                                      | 9.6%           | 32.7%          | 254, 277                                | 2(104)             | 0.31 [0.15,<br>0.66]                           | 0%             | 0.002          |
| • RCT: Vs Control                              | 0.0%           | 2.9%           | 254                                     | 1(70)              | 0.33 [0.01,<br>7.91]                           | NA             | 0.50           |
| • NRCT: Vs Control                             | 29.4%          | 94.1%          | 277                                     | 1(34)              | 0.31 [0.15,<br>0.66]                           | NA             | 0.002          |

| Outcome                                                      | Incidence % |          | Studies                                         | n (N)   | RR [95% CI],<br>MD [95% CI] | I <sup>2</sup> | P value  |
|--------------------------------------------------------------|-------------|----------|-------------------------------------------------|---------|-----------------------------|----------------|----------|
|                                                              | Drugs       | Control  |                                                 |         |                             |                |          |
| Dopaminergic drugs:<br>RCT                                   | 6.0%        | 27.5%    | <sup>259</sup>                                  | 1(163)  | 0.22 [0.09,<br>0.55]        | NA             | 0.001    |
| Antibiotics: RCTs                                            | 10.3%       | 11.1%    | <sup>252, 255,<br/>256, 263,<br/>264, 266</sup> | 6(4201) | 0.93 [0.78,<br>1.10]        | 17%            | 0.40     |
| Metoclopramide: RCT                                          | 26.7%       | 86.7%    | <sup>265</sup>                                  | 1(60)   | 0.31 [0.17,<br>0.57]        | NA             | 0.0002   |
| <b>mRS</b>                                                   |             |          |                                                 |         |                             |                |          |
| Antibiotics: RCTs                                            |             |          |                                                 |         |                             |                |          |
| • mRS 0-2                                                    | 46.0%       | 45.4%    | <sup>250, 256,<br/>264, 266</sup>               | 3(3946) | 1.02 [0.83,<br>1.25]        | 56%            | 0.85     |
| • mRS 3-6                                                    | 43.3%       | 45.4%    | <sup>263, 264, 266</sup>                        | 3(2825) | 0.97 [0.91,<br>1.02]        | 31%            | 0.25     |
| <b>Length of stay in<br/>hospital, days</b>                  |             |          |                                                 |         |                             |                |          |
| • ACE inhibitor: RCT                                         | 37±22       | 51±36    | <sup>257</sup>                                  | 1(68)   | -14.00 [-<br>28.09, 0.09]   | NA             | 0.05     |
| • Dopaminergic: RCT                                          | 37±22       | 51±36    | <sup>257</sup>                                  | 1(68)   | -14.00 [-<br>28.09, 0.09]   | NA             | 0.05     |
| • Antibiotics: RCT                                           | 12.5±5.9    | 10.2±5.8 | <sup>256, 266</sup>                             | 2(3755) | 3.49 [-3.37,<br>10.35]      | 100%           | 0.32     |
| <b>Aspiration</b>                                            |             |          |                                                 |         |                             |                |          |
| • ACE inhibitors: RCT                                        | 26.2%       | 91.7%    | <sup>269</sup>                                  | 1(54)   | 0.29 [0.17,<br>0.49]        | NA             | <0.00001 |
| • Dopaminergic<br>drugs: RCT                                 | 25.9%       | 91.7%    | <sup>269</sup>                                  | 1(39)   | 0.30 [0.16,<br>0.58]        | 0%             | 0.0003   |
| <b>Latency of swallowing<br/>reflex</b>                      |             |          |                                                 |         |                             |                |          |
| • TRPV agonist                                               |             |          |                                                 |         |                             |                |          |
| • Change                                                     |             |          |                                                 |         |                             |                |          |
| • Overall                                                    | -7.4±1.2    | -0.5±7.2 | <sup>253, 254, 276</sup>                        | 3(174)  | -5.14 [-7.86,<br>-2.41]     | 100%           | 0.80     |
| • RCT                                                        | -7.9±1.5    | -0.6±9.4 | <sup>253, 254</sup>                             | 2(134)  | -6.68 [-<br>15.75, 2.39]    | 90%            | 0.15     |
| • NRCT                                                       | -5.5±0.0    | 0.0±0.01 | <sup>276</sup>                                  | 1(40)   | -5.50 [-5.50,<br>-5.50]     | NA             | <0.00001 |
| <b>Upper oesophageal<br/>sphincter opening<br/>time, sec</b> |             |          |                                                 |         |                             |                |          |

| Outcome                                                | Incidence % |          | Studies             | n (N)  | RR [95% CI],<br>MD [95% CI] | I <sup>2</sup> | P value  |
|--------------------------------------------------------|-------------|----------|---------------------|--------|-----------------------------|----------------|----------|
|                                                        | Drugs       | Control  |                     |        |                             |                |          |
| • TRPV agonist                                         | 0.9±0.1     | 1.0±0.0  | <sup>262</sup>      | 2(50)  | -0.08 [-0.13,<br>-0.04]     | 41%            | 0.0002   |
| <b>Laryngeal vestibule closure time, sec</b>           |             |          |                     |        |                             |                |          |
| • TRPV agonist                                         | 0.3±0.0     | 0.4±0.0  | <sup>121, 262</sup> | 3(116) | -0.10 [-0.12,<br>-0.08]     | 70%            | <0.00001 |
| <b>Hyoid bone maximum anterior extension time, sec</b> |             |          |                     |        |                             |                |          |
| • TRPV agonist                                         | 0.5±0.0     | 0.6±0.1  | <sup>121, 262</sup> | 3(146) | -0.15 [-0.16,<br>-0.13]     | 0%             | <0.00001 |
| <b>Latency of Swallowing reflex</b>                    |             |          |                     |        |                             |                |          |
| • Dopaminergic drugs: RCT                              | 2.9±0.8     | 8.3±1.2  | <sup>270</sup>      | 1(54)  | -5.40 [-5.94,<br>-4.86]     | NA             | <0.00001 |
| <b>Swallows/min</b>                                    |             |          |                     |        |                             |                |          |
| • TRPV agonist                                         |             |          |                     |        |                             |                |          |
| • Change: RCT                                          | 3.3±2.5     | 0.0±0.05 | <sup>254</sup>      | 1(70)  | 3.30 [2.47,<br>4.13]        | NA             | <0.00001 |

ACE: Angiotensin converting enzyme; CI: Confidence intervals; I<sup>2</sup>, p: Heterogeneity; n: Number of studies; N: Number of patients; MD: Mean difference; NA: Not applicable; NRCT: Non-Randomized Controlled Trial; p: Statistical significance value; RCT: Randomized Controlled Trial; RR: Risk ratio; TRPV: transient receptor potential vanilloid



**Table 15:** Effect of different neurostimulation modalities on key outcomes

| Outcome                               | Mean±SD     |         | Studies                                                            | n (N)   | RR [95% CI]/<br>(S)MD [95% CI] | I <sup>2</sup> | p value  |
|---------------------------------------|-------------|---------|--------------------------------------------------------------------|---------|--------------------------------|----------------|----------|
|                                       | Stimulation | Control |                                                                    |         |                                |                |          |
| <b>Improvement in dysphagia score</b> |             |         |                                                                    |         |                                |                |          |
| TES                                   |             |         |                                                                    |         |                                |                |          |
| • Overall                             | 5.8±2.7     | 3.5±2.6 | 173, 282, 284, 287, 294-296, 299, 301, 304, 307, 308, 312-317, 319 | 22(868) | 0.90 [0.62, 1.18]              | 69%            | <0.00001 |
| • RCT                                 | 6.2±2.8     | 3.7±2.7 | 173, 282, 284, 287, 294-296, 299, 301, 304, 307, 308, 312-315      | 19(746) | 0.90 [0.60, 1.19]              | 70%            | <0.00001 |
| • NRCT                                | 3.7±1.9     | 1.8±1.9 | 316, 317, 319                                                      | 3(122)  | 1.14 [-0.13, 2.41]             | 78%            | 0.08     |
| rTMS                                  |             |         |                                                                    |         |                                |                |          |
| • Overall                             | 9.6±6.1     | 4.7±5.1 |                                                                    | 11(236) | 1.33 [0.51, 2.16]              | 85%            | 0.002    |
| • RCT                                 | 10.5±6.4    | 5.3±5.5 | 285, 289-291, 295, 297, 298, 300                                   | 10(212) | 1.51 [0.60, 2.42]              | 85%            | 0.001    |
| • NRCT                                | 0.8±2.6     | 0.7±2.5 | 318                                                                | 1(24)   | 0.04 [-0.76, 0.84]             | NA             | 0.93     |
| tDCS                                  |             |         |                                                                    |         |                                |                |          |
| • Overall                             | 2.8±2.3     | 2.0±1.8 | 281, 292, 293, 303, 306, 310                                       | 8(196)  | 0.75 [0.38, 1.12]              | 26%            | <0.0001  |
| • RCT                                 | 2.8±2.3     | 2.0±1.8 | 281, 292, 293, 303, 306, 310                                       | 8(196)  | 0.75 [0.38, 1.12]              | 26%            | <0.0001  |
| PES, Non-tracheostomised              |             |         |                                                                    |         |                                |                |          |
| • Overall                             | 2.3±1.9     | 1.6±2.2 | 283, 288, 297, 302, 309                                            | 5(204)  | 0.77 [-0.06, 1.60]             | 80%            | 0.07     |
| • RCT                                 | 2.3±1.9     | 1.6±2.2 | 283, 288, 297, 302, 309                                            | 5(204)  | 0.77 [-0.06, 1.60]             | 80%            | 0.07     |
| PES, tracheostomised                  |             |         |                                                                    |         |                                |                |          |
| • Overall                             | 5.6±3.9     | 5.2±4.3 | 286, 305                                                           | 2(83)   | 0.25 [-0.19, 0.69]             | 0%             | 0.27     |
| • RCT                                 | 5.6±3.9     | 5.2±4.3 | 286, 305                                                           | 2(83)   | 0.25 [-0.19, 0.69]             | 0%             | 0.27     |
| <b>Mortality, RCT</b>                 |             |         |                                                                    |         |                                |                |          |
| • 2 weeks, PES                        | 3.5%        | 1.5%    | 283, 288                                                           | 2(154)  | 1.66 [0.22, 12.37]             | 0%             | 0.62     |

|                                         |           |           |                    |        |                       |     |           |
|-----------------------------------------|-----------|-----------|--------------------|--------|-----------------------|-----|-----------|
| • 3 months, PES                         | 13.8%     | 12.0%     | 283, 288, 309      | 3(231) | 1.10 [0.55, 2.18]     | 0%  | 0.78      |
| <b>mRS, RCT</b>                         |           |           |                    |        |                       |     |           |
| • rTMS                                  | 1.0±0.7   | 2.5±1.3   | 285                | 1(38)  | -1.50 [-2.29, -0.71]  | 0%  | 0.0002    |
| • PES                                   | 3.8±1.1   | 4.2±1.0   | 283, 286           | 2(177) | -0.33 [-0.63, -0.02]  | 0%  | 0.04      |
| <b>Pneumonia, RCT</b>                   |           |           |                    |        |                       |     |           |
| • TES                                   | 5.8%      | 8.5%      | 173, 314           | 2(99)  | 0.75 [0.19, 2.95]     | NA  | 0.68      |
| • tDCS                                  | 37.9%     | 53.3%     | 306                | 1(59)  | 0.71 [0.40, 1.26]     | NA  | 0.24      |
| • PES                                   | 7.6%      | 11.5%     | 283, 286           | 2(209) | 0.66 [0.29, 1.52]     | 0%  | 0.33      |
| <b>BI</b>                               |           |           |                    |        |                       |     |           |
| • rTMS, Overall                         | 76.8±7.9  | 52.8±14.5 | 285, 289, 290, 318 | 5(110) | 29.54 [25.82, 33.26]  | 87% | < 0.00001 |
| • rTMS, RCT                             | 79.8±5.1  | 46.9±12.7 | 285, 289, 290      | 4(86)  | 31.57 [27.75, 35.39]  | 73% | < 0.00001 |
| • rTMS, NRCT                            | 64.0±20.0 | 70.0±20.0 | 318                | 1(24)  | -6.00 [-22.00, 10.00] | NA  | 0.46      |
| • PES, RCT                              | 36.1±30.5 | 27.0±25.7 | 283, 288           | 2(154) | -0.34 [-1.19, 0.51]   | 74% | 0.43      |
| <b>LOS, Hospital (d), RCT</b>           |           |           |                    |        |                       |     |           |
| • tDCS                                  | 16.2±6.8  | 13.4±5.1  | 306                | 1(59)  | 2.80 [-0.28, 5.88]    | NA  | 0.07      |
| • PES                                   | 32.4±20.7 | 35.3±22.1 | 283, 305           | 3(192) | -4.23 [-12.11, 3.66]  | 33% | 0.29      |
| <b>LOS, ICU (d), RCT</b>                |           |           |                    |        |                       |     |           |
| • tDCS                                  | 6.7±4.4   | 7.0±3.3   | 306                | 1(59)  | -0.30 [-2.29, 1.69]   | NA  | 0.77      |
| • PES                                   | 38.2±14.9 | 38.8±19.7 | 306                | 1(59)  | -0.60 [-14.45, 13.25] | NA  | 0.93      |
| <b>Decannulation</b>                    |           |           |                    |        |                       |     |           |
| • Tracheotomised patients, PES, Overall | 59.0%     | 7.5%      | 286, 305, 320      | 3(145) | 5.43 [2.42, 12.16]    | 0%  | < 0.0001  |
| • Tracheotomised patients, PES, RCT     | 58.2%     | 11.4%     | 286, 305           | 2(99)  | 4.64 [2.00, 10.79]    | 0%  | 0.004     |
| • Tracheotomised patients, PES, NRCT    | 60.9%     | 0.0%      | 320                | 1(46)  | 29.00 [1.83, 459.04]  | NA  | 0.02      |
| <b>Feeding Tube removal</b>             |           |           |                    |        |                       |     |           |
| • TES, RCT                              | 50.0%     | 14.3%     | 294                | 1(19)  | 3.50 [0.52, NA]       | NA  | 0.2       |

|                                                   |           |          |                     |        |                      |     |          |
|---------------------------------------------------|-----------|----------|---------------------|--------|----------------------|-----|----------|
|                                                   |           |          |                     |        | 23.42]               |     |          |
| • PES, RCT                                        | 50.0%     | 28.6%    | <sup>309</sup>      | 1(30)  | 1.75 [0.67, 4.58]    | NA  | 0.25     |
| <b>Quality of Life, change from baseline, RCT</b> |           |          |                     |        |                      |     |          |
| • Swallowing QoL, TES                             | 26.2±18.2 | 7.2±17.1 | <sup>304, 312</sup> | 3(106) | 18.02 [11.41, 24.63] | 37% | <0.00001 |

CI: Confidence intervals; tDCS: transcranial Direct Current Stimulation;  $I^2$ : Heterogeneity; n: Number of studies; N: Number of patients; TES: Transcutaneous Electrical Stimulation; NRCT: RCT: Non-randomized controlled trial (Cohort, before after, case-control studies); p: Statistical significance value; PES: Pharyngeal Electrical Stimulation; RCT: Randomized controlled trial; RR: Risk ratio SD: Standard Deviation; SMD: Standard Mean Difference; rTMS: repetitive Transcranial Magnetic Stimulation; BI: Barthel Index; LOS: Length of stay; ICU: Intensive care unit; NRCT: Non-Randomized Controlled Trial; RCT: Randomized Controlled Trial;

**Table 16. Summary table of PICO-questions and recommendations**

| PICO-question                                                                                                                                                                                                                                                                                                                                                                                 | Recommendations/Expert Opinions                                                                                                                                                                                                                                                                                                                                                                                                                  |
|-----------------------------------------------------------------------------------------------------------------------------------------------------------------------------------------------------------------------------------------------------------------------------------------------------------------------------------------------------------------------------------------------|--------------------------------------------------------------------------------------------------------------------------------------------------------------------------------------------------------------------------------------------------------------------------------------------------------------------------------------------------------------------------------------------------------------------------------------------------|
| <b>Dysphagia Screening</b>                                                                                                                                                                                                                                                                                                                                                                    |                                                                                                                                                                                                                                                                                                                                                                                                                                                  |
| 1. In patients with acute stroke does screening compared to no screening for dysphagia improve functional outcome and/or survival, reduce aspiration risk, reduce length of hospital stay, reduce adverse events and complications, have an effect on nutritional status, and have an effect on quality-of-life?                                                                              | <p>Recommendation 1: In all patients with acute stroke, we recommend a formal dysphagia screening test to prevent post-stroke pneumonia and decrease risk of early mortality. We recommend to screen the patients as fast as possible after admission. For screening, either water-swallow-tests or multiple consistency tests may be used.<br/>Quality of evidence: Moderate ⊕⊕⊕<br/>Strength of recommendation: Strong for intervention ↑↑</p> |
| 2. In patients with acute stroke, does early dysphagia screening compared to no screening or late screening, improve functional outcome and/or survival, reduce aspiration risk, length of hospital stay, adverse events and complications and have an effect on nutritional status and on quality of life?                                                                                   | <p>Recommendation 2: In patients with acute stroke, we recommend no administration of any food or liquid items, including oral medication, until a dysphagia screening has been done and swallowing was judged to be safe.<br/>Quality of evidence: Moderate ⊕⊕⊕<br/>Strength of recommendation: Strong for intervention ↑↑</p>                                                                                                                  |
| 3. In patients with acute stroke does dysphagia screening with multiple consistencies compared to screening with single consistencies improve functional outcome and/or survival, reduce aspiration risk, length of hospital stay, adverse events and complications, and have an effect on nutritional status and/or quality of life?                                                         |                                                                                                                                                                                                                                                                                                                                                                                                                                                  |
| <b>Nutritional Screening</b>                                                                                                                                                                                                                                                                                                                                                                  |                                                                                                                                                                                                                                                                                                                                                                                                                                                  |
| 1. In patients with post-stroke dysphagia does nutritional screening/assessment compared to no nutritional screening/assessment improve functional outcome and/or survival, reduce aspiration risk, reduce length of hospital stay, reduce adverse events and complications, improve swallowing status/function, have an effect on nutritional status, and have an effect on quality of life? | <p>Expert opinion: There is consensus among the guideline group (15/15) that patients with acute stroke should be screened for nutritional risk within the first days after hospital admission using validated screening tools.</p>                                                                                                                                                                                                              |
| <b>Dysphagia Assessment</b>                                                                                                                                                                                                                                                                                                                                                                   |                                                                                                                                                                                                                                                                                                                                                                                                                                                  |
| 1. In patients with acute and/or subacute stroke does full clinical and instrumental assessment compared to no assessment improve functional outcome and/or survival, reduce aspiration risk, reduce length of hospital stay, reduce adverse events and complications, have an effect on nutritional status, and/or have an effect on quality                                                 | <p>Recommendation 3: We suggest a dysphagia assessment in all stroke patients failing a dysphagia screening and/or showing other clinical predictors of post-stroke dysphagia, in particular a severe facial palsy, severe dysarthria, severe aphasia or an overall severe neurological deficit (NIH-SS ≥ 10 points). Dysphagia assessment should be done as soon as possible. In addition to the clinical swallow examination,</p>              |

|                                                                                                                                                                                                                                                                                                                                                                                                                                                                                                                                                                                                                                                                                                                                                                                                                                                                                                                                                                                                                                                                                                                                                                                                                                                                                                                                                                                                                                                                                                                                                                                                                                                                                                                                                                                                                 |                                                                                                                                                                                                                                                                                                                                                                                                                                                                                                            |
|-----------------------------------------------------------------------------------------------------------------------------------------------------------------------------------------------------------------------------------------------------------------------------------------------------------------------------------------------------------------------------------------------------------------------------------------------------------------------------------------------------------------------------------------------------------------------------------------------------------------------------------------------------------------------------------------------------------------------------------------------------------------------------------------------------------------------------------------------------------------------------------------------------------------------------------------------------------------------------------------------------------------------------------------------------------------------------------------------------------------------------------------------------------------------------------------------------------------------------------------------------------------------------------------------------------------------------------------------------------------------------------------------------------------------------------------------------------------------------------------------------------------------------------------------------------------------------------------------------------------------------------------------------------------------------------------------------------------------------------------------------------------------------------------------------------------|------------------------------------------------------------------------------------------------------------------------------------------------------------------------------------------------------------------------------------------------------------------------------------------------------------------------------------------------------------------------------------------------------------------------------------------------------------------------------------------------------------|
| <p>of life?</p> <p>2. In patients with acute and /or subacute stroke does early assessment for dysphagia compared to late assessment improve functional outcome and/or survival, reduce aspiration risk, reduce length of hospital stay, reduce adverse events and complications, have an effect on nutritional status, and/or have an effect on quality of life?</p> <p>3. In patients with acute and /or subacute stroke do repeated assessments compared to single assessments improve functional outcome and/or survival, reduce aspiration risk, reduce length of hospital stay, reduce adverse events and complications, have an effect on nutritional status, and/or have an effect on quality of life?</p> <p>4. In patients with stroke does clinical bedside assessment compared to instrumental assessment improve functional outcome and/or survival, reduce aspiration risk, reduce length of hospital stay, reduce adverse events and complications, have an effect on nutritional status, and/or have an effect on quality of life?</p> <p>5. In patients with acute and/or subacute stroke does instrumental assessment with VFSS compared to FEES improve functional outcome and/or survival, reduce aspiration risk, reduce length of hospital stay, reduce adverse events and complications, have an effect on nutritional status, and/or have an effect on quality of life?</p> <p>6. In patients with acute and / or subacute stroke do complementary assessments to clinical assessments (i.e. spirometry, EMG) compared to standard clinical assessment improve functional outcome and/or survival, reduce aspiration risk, reduce length of hospital stay, reduce adverse events and complications, have an effect on nutritional status, and/or have an effect on quality of life?</p> | <p>VFSS, or, preferentially, FEES should be available.<br/> Quality of evidence: Low ⊕⊕<br/> Strength of recommendation: Weak for intervention ↑?4</p> <p>Recommendation 4: We suggest that in acute stroke patients swallowing of tablets should routinely be evaluated as part of dysphagia assessment in addition to assessing the swallowing of liquid and different food consistencies and quantities.<br/> Quality of evidence: Low ⊕⊕<br/> Strength of recommendation: Weak for intervention ↑?</p> |
| <p><b>Dysphagia Treatment</b></p>                                                                                                                                                                                                                                                                                                                                                                                                                                                                                                                                                                                                                                                                                                                                                                                                                                                                                                                                                                                                                                                                                                                                                                                                                                                                                                                                                                                                                                                                                                                                                                                                                                                                                                                                                                               |                                                                                                                                                                                                                                                                                                                                                                                                                                                                                                            |
| <p><b>a. Dietary Interventions</b></p>                                                                                                                                                                                                                                                                                                                                                                                                                                                                                                                                                                                                                                                                                                                                                                                                                                                                                                                                                                                                                                                                                                                                                                                                                                                                                                                                                                                                                                                                                                                                                                                                                                                                                                                                                                          |                                                                                                                                                                                                                                                                                                                                                                                                                                                                                                            |
| <p>1. In patients with post-stroke dysphagia does texture diet modification compared to no texture</p>                                                                                                                                                                                                                                                                                                                                                                                                                                                                                                                                                                                                                                                                                                                                                                                                                                                                                                                                                                                                                                                                                                                                                                                                                                                                                                                                                                                                                                                                                                                                                                                                                                                                                                          | <p>Recommendations 5: In patients with post-stroke dysphagia, we suggest that texture modified diets and/or</p>                                                                                                                                                                                                                                                                                                                                                                                            |

|                                                                                                                                                                                                                                                                                                                                                                                                                                                                                                                                                                                                                                                               |                                                                                                                                                                                                                                                                                                                                                                                                                                                                                                                                                                                                                                                                                                                                                                                                                                                                                                                        |
|---------------------------------------------------------------------------------------------------------------------------------------------------------------------------------------------------------------------------------------------------------------------------------------------------------------------------------------------------------------------------------------------------------------------------------------------------------------------------------------------------------------------------------------------------------------------------------------------------------------------------------------------------------------|------------------------------------------------------------------------------------------------------------------------------------------------------------------------------------------------------------------------------------------------------------------------------------------------------------------------------------------------------------------------------------------------------------------------------------------------------------------------------------------------------------------------------------------------------------------------------------------------------------------------------------------------------------------------------------------------------------------------------------------------------------------------------------------------------------------------------------------------------------------------------------------------------------------------|
| <p>diet modification improve functional outcome and/or survival, reduce aspiration risk, reduce length of hospital stay, reduce adverse events and complications, improve swallowing status/ ability, have an effect on nutritional status, and have an effect on quality of life?</p> <p>2. In patients with post-stroke dysphagia, does fluid thickening compared to no fluid thickening, improve functional outcome and/or survival, reduce aspiration risk, reduce length of hospital stay, reduce adverse events and complications, improve swallowing status/ ability, have an effect on nutritional status, and have an effect on quality of life?</p> | <p>thickened liquids may be used to reduce the risk of pneumonia. Quality of evidence: Low ⊕⊕<br/>Strength of recommendation: Weak for intervention ↑?</p> <p>Recommendation 6: In patients with post-stroke dysphagia we recommend that texture modified diets and/or thickened liquids are prescribed only based on an appropriate assessment of swallowing.<br/>Quality of evidence: Low ⊕⊕<br/>Strength of recommendation: Strong for intervention ↑↑</p> <p>Recommendation 7: In stroke patients put on texture modified diet and/or thickened liquids we recommend to monitor fluid balance and nutritional intake.<br/>Quality of evidence: Moderate ⊕⊕⊕<br/>Strength of recommendation: Strong for intervention ↑↑</p>                                                                                                                                                                                         |
| <p><b>b. Behavioural interventions</b></p>                                                                                                                                                                                                                                                                                                                                                                                                                                                                                                                                                                                                                    |                                                                                                                                                                                                                                                                                                                                                                                                                                                                                                                                                                                                                                                                                                                                                                                                                                                                                                                        |
| <p>1. In patients with post-stroke dysphagia do behavioural swallowing exercises compared to no treatment improve functional outcome and/or survival, reduce aspiration risk, reduce length of hospital stay, reduce adverse events and complications, improve swallowing status/ ability, have an effect on nutritional status, and have an effect on quality of life?</p>                                                                                                                                                                                                                                                                                   | <p>Recommendation 8: In patients with post-stroke dysphagia, we suggest behavioural swallowing exercises to rehabilitate swallowing function.<br/>Quality of evidence: Moderate ⊕⊕⊕<br/>Strength of recommendation: Weak for intervention ↑?</p> <p>Recommendation 9: In patients with post-stroke dysphagia, we suggest that behavioural interventions should not be limited to one specific manoeuvre or training, but the treatment should be tailored to the specific swallowing impairment of the individual patient based on a careful assessment of dysphagia.<br/>Quality of evidence: Moderate ⊕⊕⊕<br/>Strength of recommendation: Weak for intervention ↑?</p> <p>Recommendation 10: In patients with post-stroke dysphagia, we suggest that acupuncture may be used to rehabilitate swallowing function.<br/>Quality of evidence: Moderate ⊕⊕⊕<br/>Strength of recommendation: Weak for intervention ↑?</p> |
|                                                                                                                                                                                                                                                                                                                                                                                                                                                                                                                                                                                                                                                               |                                                                                                                                                                                                                                                                                                                                                                                                                                                                                                                                                                                                                                                                                                                                                                                                                                                                                                                        |
| <p><b>c. Nutritional Interventions</b></p>                                                                                                                                                                                                                                                                                                                                                                                                                                                                                                                                                                                                                    |                                                                                                                                                                                                                                                                                                                                                                                                                                                                                                                                                                                                                                                                                                                                                                                                                                                                                                                        |
| <p>1. In patients with post-stroke dysphagia does early initiation of oral nutritional therapy compared to late initiation of nutritional therapy improve functional outcome and/or survival, reduce</p>                                                                                                                                                                                                                                                                                                                                                                                                                                                      | <p>Recommendation 11: In unselected stroke patients, we suggest to avoid routine use of oral nutritional supplementation.<br/>Quality of evidence: Moderate ⊕⊕⊕</p>                                                                                                                                                                                                                                                                                                                                                                                                                                                                                                                                                                                                                                                                                                                                                    |

|                                                                                                                                                                                                                                                                                                                                                                                                                                                                                                                                                                                                                                        |                                                                                                                                                                                                                                                                                                                                                                                                                                                                                                                                                                                                                                                                                                                                                                                                                                           |
|----------------------------------------------------------------------------------------------------------------------------------------------------------------------------------------------------------------------------------------------------------------------------------------------------------------------------------------------------------------------------------------------------------------------------------------------------------------------------------------------------------------------------------------------------------------------------------------------------------------------------------------|-------------------------------------------------------------------------------------------------------------------------------------------------------------------------------------------------------------------------------------------------------------------------------------------------------------------------------------------------------------------------------------------------------------------------------------------------------------------------------------------------------------------------------------------------------------------------------------------------------------------------------------------------------------------------------------------------------------------------------------------------------------------------------------------------------------------------------------------|
| <p>aspiration risk, reduce length of hospital stay, reduce adverse events and complications, improve swallowing status/function, have an effect on nutritional status, and have an effect on quality of life?</p> <p>2. In patients with post-stroke dysphagia does early enteral or parenteral feeding compared to late or restrictive enteral or parenteral feeding improve functional outcome and/or survival, reduce aspiration risk, reduce length of hospital stay, reduce adverse events and complications, improve swallowing status/ability, have an effect on nutritional status, and have an effect on quality of life?</p> | <p>Strength of recommendation: Weak against intervention ↓?</p> <p>Recommendation 12: In stroke patients who tolerate an oral diet and present with a risk of malnutrition or with manifest malnutrition, we suggest to consider the use of oral nutritional supplementation.<br/>Quality of evidence: Low ⊕⊕<br/>Strength of recommendation: Weak for intervention ↑?</p> <p>Recommendation 13: In patients with post-stroke dysphagia and insufficient oral intake we suggest an early enteral nutrition via a nasogastric tube.<br/>Quality of evidence: Moderate ⊕⊕⊕<br/>Strength of recommendation: Weak for intervention ↑?</p>                                                                                                                                                                                                     |
| <p><b>d. Interventions to improve oral health</b></p>                                                                                                                                                                                                                                                                                                                                                                                                                                                                                                                                                                                  |                                                                                                                                                                                                                                                                                                                                                                                                                                                                                                                                                                                                                                                                                                                                                                                                                                           |
| <p>1. In patients with post-stroke dysphagia does specific oral health care compared to standard care improve functional outcome and/or survival, reduce aspiration risk, reduce length of hospital stay, reduce adverse events and complications, improve swallowing status/ ability, have an effect on nutritional status, and have an effect on quality of life?</p>                                                                                                                                                                                                                                                                | <p>Recommendation 14: In stroke patients we suggest to implement oral health care interventions to reduce the risk of pneumonia.<br/>Quality of evidence: Low ⊕⊕<br/>Strength of recommendation: Weak for intervention ↑?</p>                                                                                                                                                                                                                                                                                                                                                                                                                                                                                                                                                                                                             |
| <p><b>e. Pharmacological treatment</b></p>                                                                                                                                                                                                                                                                                                                                                                                                                                                                                                                                                                                             |                                                                                                                                                                                                                                                                                                                                                                                                                                                                                                                                                                                                                                                                                                                                                                                                                                           |
| <p>1. In patients with post-stroke dysphagia, does pharmacological treatment compared to no treatment improve functional outcome and/or survival, reduce aspiration risk, reduce length of hospital stay, reduce adverse events and complications, improve swallowing status/ ability, have an effect on nutritional status, and have an effect on quality of life?</p>                                                                                                                                                                                                                                                                | <p>Recommendation 15: We recommend that due to the limited evidence available with regards to clinical endpoints, pharmacological treatment of post-stroke dysphagia should be preferably used within clinical trial settings.<br/>Quality of evidence: Low ⊕⊕<br/>Strength of recommendation: Strong for intervention ↑↑</p> <p>Recommendation 16: We recommend that preventive antimicrobial treatment is not used in stroke patients.<br/>Quality of evidence: High ⊕⊕⊕⊕<br/>Strength of recommendation: Strong against intervention ↓↓</p> <p>Recommendation 17: In stroke patients with post-stroke dysphagia and an impaired swallow response, we suggest to consider TRPV1 agonists and dopaminergic agents to improve swallowing safety. Quality of evidence: Low ⊕⊕<br/>Strength of recommendation: Weak for intervention ↑?</p> |

|                                                                                                                                                                                                                                                                                                                                                                                                                                                                                                                                                                                                                                                                                                                                                            |                                                                                                                                                                                                                                                                                                                                                                                                                                                                                                                                                                                                                                                                                                                                                                                                                                                         |
|------------------------------------------------------------------------------------------------------------------------------------------------------------------------------------------------------------------------------------------------------------------------------------------------------------------------------------------------------------------------------------------------------------------------------------------------------------------------------------------------------------------------------------------------------------------------------------------------------------------------------------------------------------------------------------------------------------------------------------------------------------|---------------------------------------------------------------------------------------------------------------------------------------------------------------------------------------------------------------------------------------------------------------------------------------------------------------------------------------------------------------------------------------------------------------------------------------------------------------------------------------------------------------------------------------------------------------------------------------------------------------------------------------------------------------------------------------------------------------------------------------------------------------------------------------------------------------------------------------------------------|
|                                                                                                                                                                                                                                                                                                                                                                                                                                                                                                                                                                                                                                                                                                                                                            | <p>Recommendation 18: In stroke patients fed via a nasogastric tube, we suggest to use metoclopramide to promote gastric emptying and reduce the risk of esophago-pharyngeal regurgitation with subsequent aspiration.</p> <p>Quality of evidence: Low ⊕⊕</p> <p>Strength of recommendation: Weak for intervention ↑?</p>                                                                                                                                                                                                                                                                                                                                                                                                                                                                                                                               |
| <p><b>f. Neurostimulation treatment</b></p>                                                                                                                                                                                                                                                                                                                                                                                                                                                                                                                                                                                                                                                                                                                |                                                                                                                                                                                                                                                                                                                                                                                                                                                                                                                                                                                                                                                                                                                                                                                                                                                         |
| <p>1. In patients with post-stroke dysphagia, do neurostimulation techniques compared to no treatment, improve functional outcome and/or survival, reduce aspiration risk, reduce length of hospital stay, reduce adverse events and complications, improve swallowing status/ ability, have an effect on nutritional status, and have an effect on quality of life?</p> <p>2. In patients with post-stroke dysphagia, do neurostimulation techniques compared to behavioural treatments improve functional outcome and/or survival, reduce aspiration risk, reduce length of hospital stay, reduce adverse events and complications, improve swallowing status/ ability, have an effect on nutritional status, and have an effect on quality of life?</p> | <p>Recommendation 19: In patients with post-stroke dysphagia, we recommend that treatment with neurostimulation techniques should preferably be conducted within a clinical trial setting.</p> <p>Quality of evidence: Low ⊕⊕</p> <p>Strength of recommendation: Strong for intervention ↑↑</p> <p>Recommendation 20: In patients with post-stroke dysphagia, we suggest treatment with rTMS, TES, tDCS and PES as adjunct to conventional dysphagia treatments.</p> <p>Quality of evidence: Moderate ⊕⊕⊕</p> <p>Strength of recommendation: Weak for intervention ↑?</p> <p>Recommendation 21: In tracheotomized stroke patients with severe dysphagia, we suggest treatment with pharyngeal electrical stimulation to accelerate decannulation.</p> <p>Quality of evidence: High ⊕⊕⊕⊕</p> <p>Strength of recommendation: Weak for intervention ↑?</p> |



## Supplement 2: Search Strategies

### Epidemiology

1. ((stroke) OR (transient ischemic attack\*) OR (TIA) OR (mild stroke) OR (minimal stroke) OR (brain hypoxia) OR (brain infarct\*) OR (brain haemorrhage) OR (brain ischemia) OR (brain isch?emi\*) OR (basal ganglia cerebrovascular disease) OR (cardioembolic stroke) OR (cerebral embolism) OR (cerebral haemorrhage) OR (cerebral infarct\*) OR (cerebrovascular accident\*) OR (CVA) OR (cerebrovascular apoplexy) OR (cerebrovascular infarct\*) OR (cerebrovascular embolism) OR (cerebrovascular disorder) OR (acute isch?emi\* stroke) OR (Ischemic stroke) OR (Ischemic apoplexy) OR (intracranial embolism) OR (Intracranial thrombosis) OR (hemiparesis) OR (hemiplegia)).tw,ti,ab.
2. ((anterior cerebral artery infarction) OR (middle cerebral artery infarction) OR (posterior cerebral artery infarction) OR (lacunar stroke) OR (wind stroke) OR (anterior circulation occlusion) OR (Post-stroke) OR (Apoplexy)).tw,ti,ab.
3. #1 OR #2
4. ((dysphagia) OR (deglutition) OR Swallowing OR (swallowing disorders) OR (deglutition disorders) OR (impaired swallowing) OR (pneumonia OR aspiration) OR (respiratory aspiration) OR (inhalation) OR (cough) OR (gastric motility) OR (odynophagia)).tw,ti,ab.
5. oropharynx\$ or trachea\$ or lung\$ or pulmon\$ adj5 aspirat\$
6. #4 OR #5
7. (Outcomes OR complication OR (quality of life) OR hospitalization OR (Length of stay) OR mortality OR morbidity OR (adverse events) OR (adverse effects) OR (nutritional status) OR nutrition OR survival)
8. #3 AND #6 AND #7

## Dysphagia Screening

1. ((stroke) OR (transient ischemic attack\*) OR (TIA) OR (mild stroke) OR (minimal stroke) OR (brain hypoxia) OR (brain infarct\*) OR (brain haemorrhage) OR (brain ischemia) OR (brain isch?emi\*) OR (basal ganglia cerebrovascular disease) OR (cardioembolic stroke) OR (cerebral embolism) OR (cerebral haemorrhage) OR (cerebral infarct\*) OR (cerebrovascular accident\*) OR (CVA) OR (cerebrovascular apoplexy) OR (cerebrovascular infarct\*) OR (cerebrovascular embolism) OR (cerebrovascular disorder) OR (acute isch?emi\* stroke) OR (Ischemic stroke) OR (Ischemic apoplexy) OR (intracranial embolism) OR (Intracranial thrombosis) OR (hemiparesis) OR (hemiplegia)).tw,ti,ab.
2. ((anterior cerebral artery infarction) OR (middle cerebral artery infarction) OR (posterior cerebral artery infarction) OR (lacunar stroke) OR (wind stroke) OR (anterior circulation occlusion) OR (Post-stroke) OR (Apoplexy)).tw,ti,ab.
3. #1 OR #2
4. ((dysphagia) OR (deglutition) OR Swallowing OR (swallowing disorders) OR (deglutition disorders) OR (impaired swallowing) OR (pneumonia OR aspiration) OR (respiratory aspiration) OR (inhalation) OR (cough) OR (gastric motility) OR (odynophagia)).tw,ti,ab.
5. oropharynx\$ or trachea\$ or lung\$ or pulmon\$ adj5 aspirat\$
6. #4 OR #5
7. (Screening OR Diagnosis OR Sensitivity OR Specificity OR Questionnaire OR test OR Evaluation OR tool OR appraisal OR (predictive value)).tw,ti,ab.
8. #3 AND #6 AND #7

## Dysphagia Assessment

1. ((stroke) OR (transient ischemic attack\*) OR (TIA) OR (mild stroke) OR (minimal stroke) OR (brain hypoxia) OR (brain infarct\*) OR (brain haemorrhage) OR (brain ischemia) OR (brain isch?emi\*) OR (basal ganglia cerebrovascular disease) OR (cardioembolic stroke) OR (cerebral embolism) OR (cerebral haemorrhage) OR (cerebral infarct\*) OR (cerebrovascular accident\*) OR (CVA) OR (cerebrovascular apoplexy) OR (cerebrovascular infarct\*) OR (cerebrovascular embolism) OR (cerebrovascular disorder) OR (acute isch?emi\* stroke) OR (Ischemic stroke) OR (Ischemic apoplexy) OR (intracranial embolism) OR (Intracranial thrombosis) OR (hemiparesis) OR (hemiplegia)).tw,ti,ab.
2. ((anterior cerebral artery infarction) OR (middle cerebral artery infarction) OR (posterior cerebral artery infarction) OR (lacunar stroke) OR (wind stroke) OR (anterior circulation occlusion) OR (Post-stroke) OR (Apoplexy)).tw,ti,ab.
3. #1 OR #2
4. ((dysphagia) OR (deglutition) OR Swallowing OR (swallowing disorders) OR (deglutition disorders) OR (impaired swallowing) OR (pneumonia OR aspiration) OR (respiratory aspiration) OR (inhalation) OR (cough) OR (gastric motility) OR (odynophagia)).tw,ti,ab.
5. oropharynx\$ or trachea\$ or lung\$ or pulmon\$ adj5 aspirat\$
6. #4 OR #5
7. ((clinical assessment) OR (medical history taking) OR (symptoms assessment) OR (physical examination) OR (clinical swallowing Evaluation) OR (CSE) OR (Questionnaire) OR (auscultation methods) OR (respiratory sounds) OR (diagnostic self-evaluation) OR (Clinical medicine) OR (mass screening) OR (Bedside screening tests) OR (Toronto Bedside Swallowing Screening Test) OR (Nursing Bedside Swallowing Screen tool) OR (NBSS tool) OR (TOR-BSST) OR (TOR-BSST) OR (fluoroscopy) OR (videofluoroscopy) OR (VFS) OR (VFSS) OR (Videofluoroscopic swallow study) OR (instrumental assessment) OR (instrument assessment) OR (fibreoptic endoscopic evaluation) OR (Fiberoptic endoscopic evaluation of swallowing) OR (FEES) OR (Swallowing accelerometry) OR (TOR-BSST) OR (RADAVE) OR (Watian Swallowing Test) OR (Swallowing Functional Assessment) OR (Swallowing Disorder Integral) OR (Gugging Swallowing Screen) OR (Swallowing screening) OR (Royal Brisbane and Women's Hospital dysphagia screening tool) OR (RBWH) OR (I-RBWH) OR (Mann assessment of swallowing ability) OR (MASA) OR (Acoustic analysis) OR (Acoustic\*) OR (Burks Dysphagia Screening Test) OR (BDST) OR (modified barium swallow) OR (MBS) OR (flexible endoscopic evaluation of swallowing) OR (FEES)).tw,ti,ab.
8. ((electromyography) OR (Surface electromyography) OR (EMG) OR (sEMG) OR (Neuromuscular Disease Swallowing Status Scale) OR (NdSSS) OR (Sydney Swallow Questionnaire) OR (SSQ) OR (spirometry) OR (Lung function test)).tw,ti,ab.
9. (Dysphagia assessment) adj5 instrument
10. #7 OR #8 OR #9
11. #3 AND #6 AND #12

## Dysphagia Treatment

1. ((stroke) OR (transient ischemic attack\*) OR (TIA) OR (mild stroke) OR (minimal stroke) OR (brain hypoxia) OR (brain infarct\*) OR (brain haemorrhage) OR (brain ischemia) OR (brain isch?emi\*) OR (basal ganglia cerebrovascular disease) OR (cardioembolic stroke) OR (cerebral embolism) OR (cerebral haemorrhage) OR (cerebral infarct\*) OR (cerebrovascular accident\*) OR (CVA) OR (cerebrovascular apoplexy) OR (cerebrovascular infarct\*) OR (cerebrovascular embolism) OR (cerebrovascular disorder) OR (acute isch?emi\* stroke) OR (Ischemic stroke) OR (Ischemic apoplexy) OR (intracranial embolism) OR (Intracranial thrombosis) OR (hemiparesis) OR (hemiplegia)).tw,ti,ab.
2. ((anterior cerebral artery infarction) OR (middle cerebral artery infarction) OR (posterior cerebral artery infarction) OR (lacunar stroke) OR (wind stroke) OR (anterior circulation occlusion) OR (Post-stroke) OR (Apoplexy)).tw,ti,ab.
3. #1 OR #2
4. ((dysphagia) OR (deglutition) OR Swallowing OR (swallowing disorders) OR (deglutition disorders) OR (impaired swallowing) OR (pneumonia OR aspiration) OR (respiratory aspiration) OR (inhalation) OR (cough) OR (gastric motility) OR (odynophagia)).tw,ti,ab.
5. oropharynx\$ or trachea\$ or lung\$ or pulmon\$ adj5 aspirat\$
6. #4 OR #5
7. (Stimulation OR Electrical OR Vitalstim OR vocastim OR stimulation OR neurostimulation OR (neuromuscular stimulation) OR (Electrical stimulation) OR (Neuromuscular electrical stimulation) OR (NMES) OR (Pharyngeal electrical stimulation) OR (PES) OR (Physical stimulation) OR (Transcranial Direct Current Stimulation) OR (TDCS) OR (transcranial magnetic stimulation) OR (brain stimulation) OR (cortical stimulation) OR (non-invasive brain stimulation) OR (repetitive transcranial magnetic stimulation) OR RTMS OR (Evoked potential) OR (motor cortex stimulation) OR (cortex stimulation) OR (alternate therapy) OR (Physical stimulation) OR (thermal OR tactile)).tw,ti,ab.
8. ((acupuncture) OR (Acupressure) OR (needle therapy) OR (acupuncture therapy) OR (acupuncture treatment) OR (acupuncture methods)).tw,ti,ab.
9. ((Behaviour treatment) OR (Swallowing exercises) OR (Behavior change techniques) OR rehabilitation OR exercise OR behavio\* OR (swallowing training) OR (swallowing exercise\*) OR (Neuromuscular exercises) OR (Myofunctional Therapy) OR intervention OR exercise OR (therapeutic exercise\*) OR (Tongue resistance Effortful swallow) OR gargling OR (Jaw exercise) OR (Therabite stretch) OR (terabite swallow) OR (Effortful swallow) OR (Mendelsohn Masako) OR Positioning OR posture).tw,ti,ab.
10. ((Oral nutrition) OR diet OR nutrition OR (fortified food) OR (diet therapy) OR (diet modification) OR (texture modified) OR (pureed diet) OR (thickened drinks) OR dysphagia diet OR consistency OR mashed OR chopped OR liquid OR fork OR (Liquidized diet) OR (modified diet) OR (Nutritional supplement) OR (oral supplement) OR (nutrition support) OR (artificial feeding) OR (Enteral nutrition) OR (Enteral feeding) OR (Tube feeding) OR (Gastric tube feeding) OR (Nasoenteric feeding) OR (Nasogastric feeding) OR (Nasojunal feeding) OR (Nasoduodenal feeding) OR (Artificial feeding) OR (Gastrostomy) OR (Percutaneous endoscopic gastrostomy) OR (sip feeding) OR (feeding route) OR (nasogastric tube) OR Nasogastric OR (nasojunal tube) OR NJT OR (gastrointestinal intubation) OR (oral intake)

OR (tube feeding) OR sham OR (sham feeding) OR (sham stimulation) OR (restrictive enteral) OR (late enteral)).tw,ti,ab.

11. (Liquids) OR (thin liquid) OR (thickened liquid) OR (thickened drinks) OR (viscosity) OR (pureed diet) OR (puree consistency) OR (mashed) OR (chopped) OR (soft solid food) OR (solid diet) OR (dysphagia diet) OR (consistency) OR (varibar) OR (Minimal Eating Observation Form) OR (Minimal Eating Form) OR (diet modification) OR (non-thickened liquid) OR (Texture modified diet) OR (texture diet) OR (dietary protein) OR (oral nutrition) OR (solid regular-texture diet)).tw,ti,ab.
12. (Medication OR Therapy OR therapeutics OR Treatment OR Drugs OR (pharmacological agents) OR nifedipine OR (Calcium antagonist) OR (Calcium channel blocker) OR (antibacterial oral gel) OR (drug treatment) OR (angiotensin converting enzyme inhibitor) OR (angiotensin converting enzyme) OR (Levodopa)).tw,ti,ab.
13. ((Malnutrition) OR (under nutrition) OR (poor nutrition) OR (Nutrition Disorders) OR (Nutritional Deficiency) OR (Subnutrition OR Sub-nutrition) OR (Nutritional status) OR (health status) OR nutrition).tw,ti,ab.
14. ((Nutrition therapy) OR (Diet therapy) OR (treatment OR management OR intervention OR supplementation) OR (feeding or nutrition) OR (nutritional supplementation) OR (swallowing therapy) OR (tube feeding) OR fluid OR (fluid supplementation) OR (sip feeding) OR (feeding route) OR timing OR diet OR hydration).tw,ti,ab.
15. ((Parenteral nutrition) OR (Parenteral feeding) OR (parenteral feed) OR (parenteral food) OR (parenteral nutrition) OR (total parenteral nutrition) OR TPN OR (total nutrient admixture) OR (partial parenteral nutrition) OR (peripheral parenteral nutrition) OR (central venous nutrition) OR (intravenous nutrition) OR (IV nutrition) OR (subcutaneous nutrition) OR (SC nutrition) OR (SC feed)).tw,ti,ab.
16. (Consistency OR (Liquids) OR (thin liquid) OR (thickened liquid) OR (thickened drinks) OR (viscosity) OR (pureed diet) OR (puree consistency) OR (mashed) OR (chopped) OR (soft solid food) OR (solid diet) OR (dysphagia diet) OR (consistency) OR (varibar) OR (E-Z-EM's Varibar) OR (Minimal Eating Observation Form) OR (Minimal Eating Form) OR (MEOF) OR (Oral nutrition) OR (texture modified diet) OR (diet modification)).tw,ti,ab.
17. ((Oral health) OR (oral mucositis) OR (oral candidiasis) OR (dental health) OR (oral dental care) OR (dental caries) OR (oral care) OR (gum)).tw,ti,ab.
18. #7 OR #8 OR #9 OR #10 OR #11 OR #12 OR #13 OR #14 OR #15 OR #16 OR #17
19. #3 AND #6 AND #18

Supplement 3: PRISMA Diagrams

Figure 1: Epidemiology

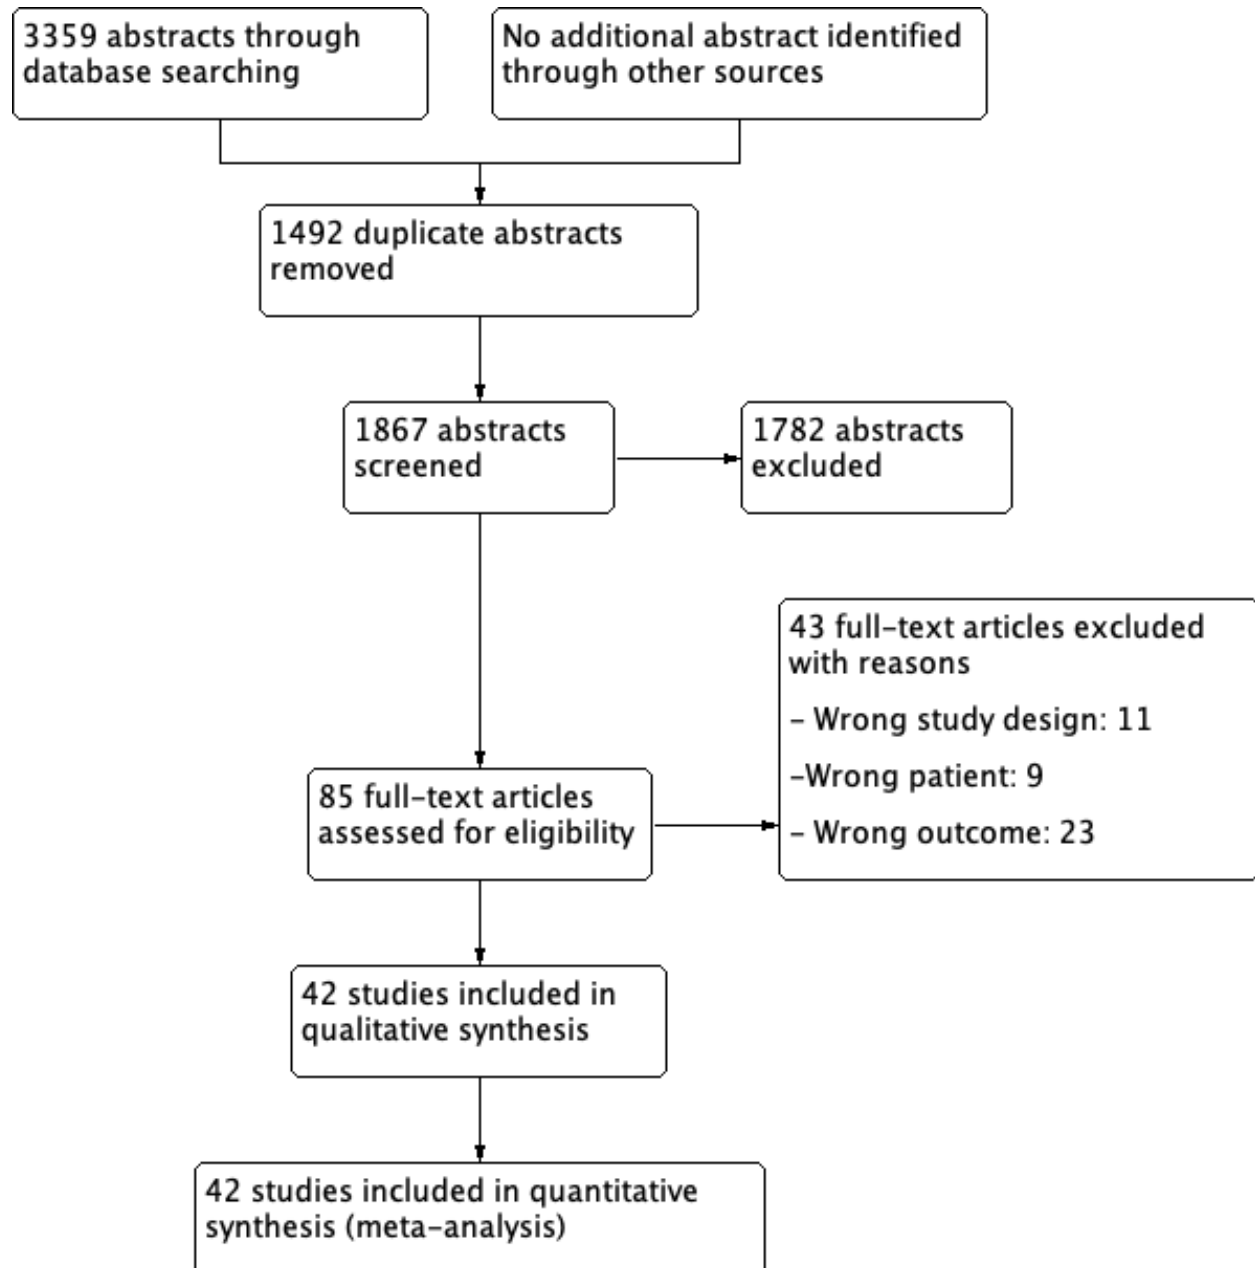

Figure 2: Screening

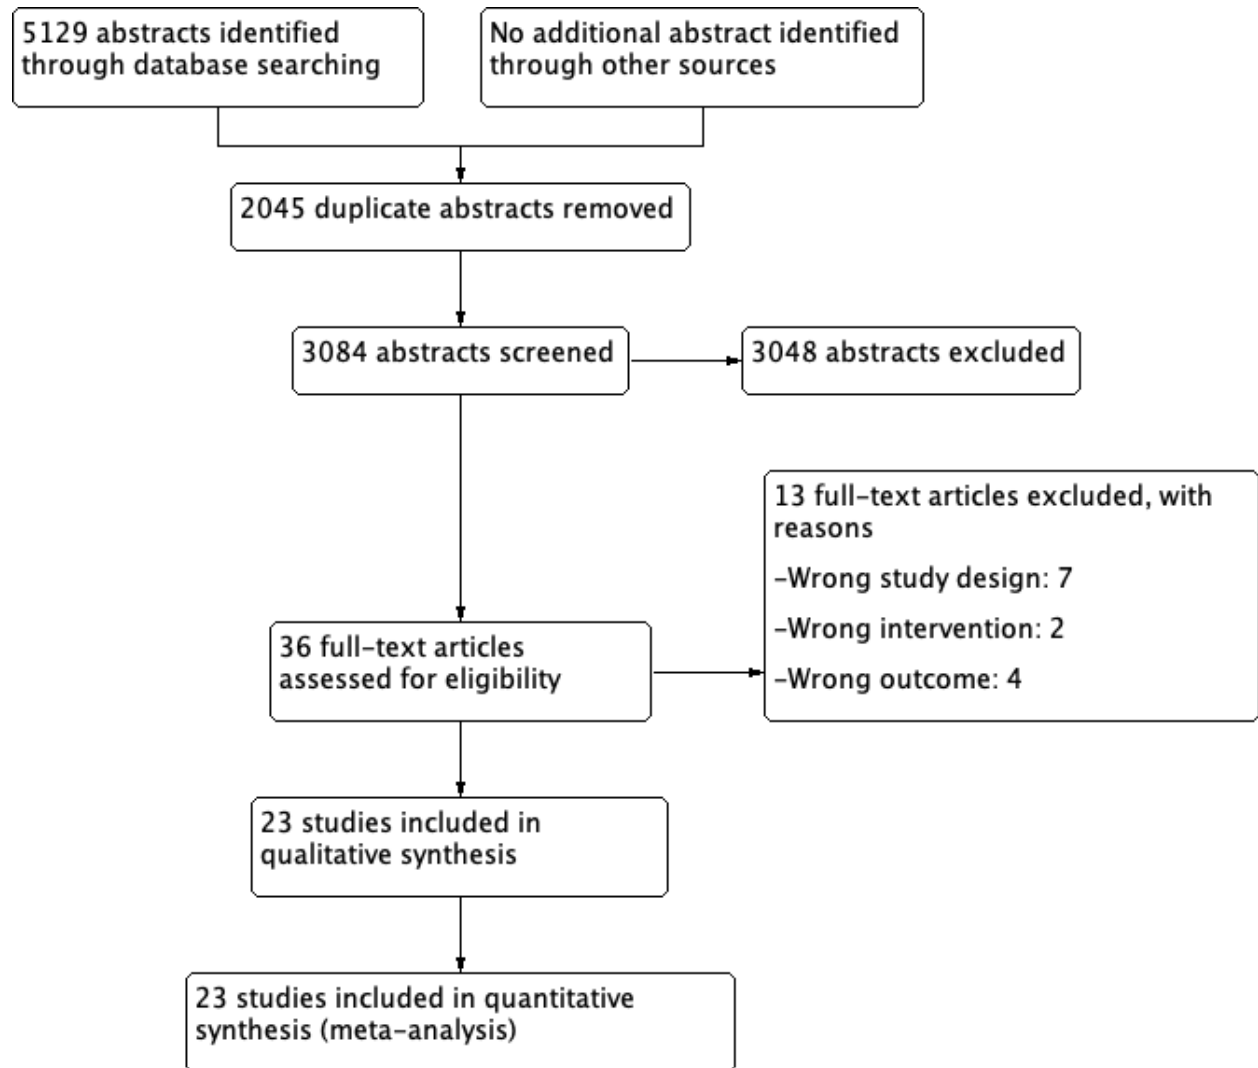

Figure 3: Assessment

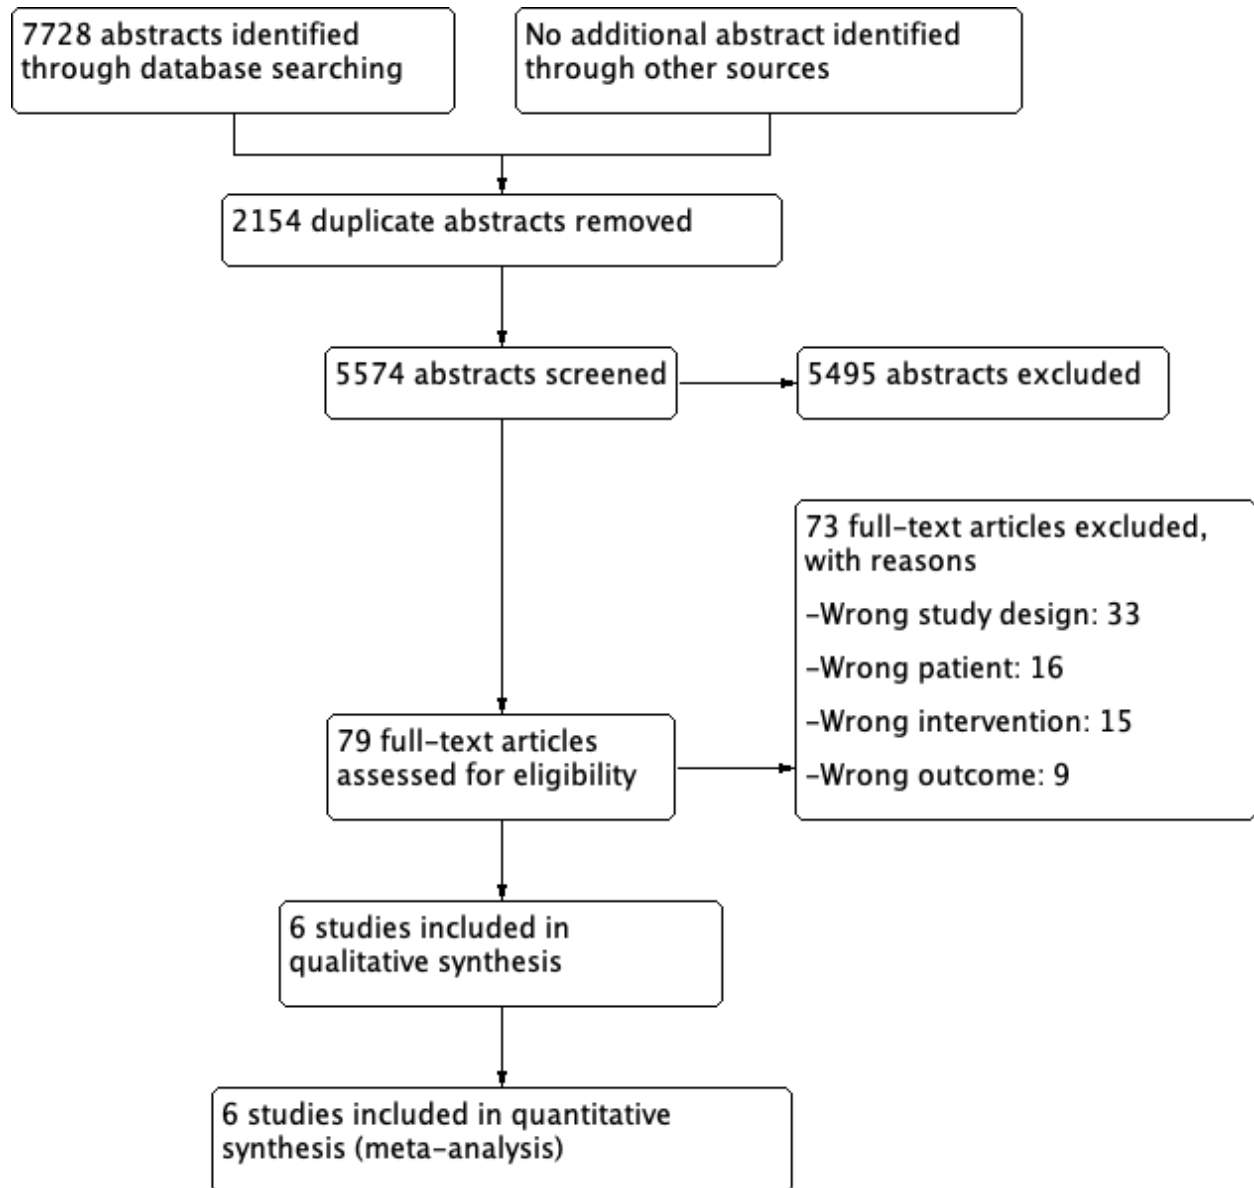



Figure 4: Treatments

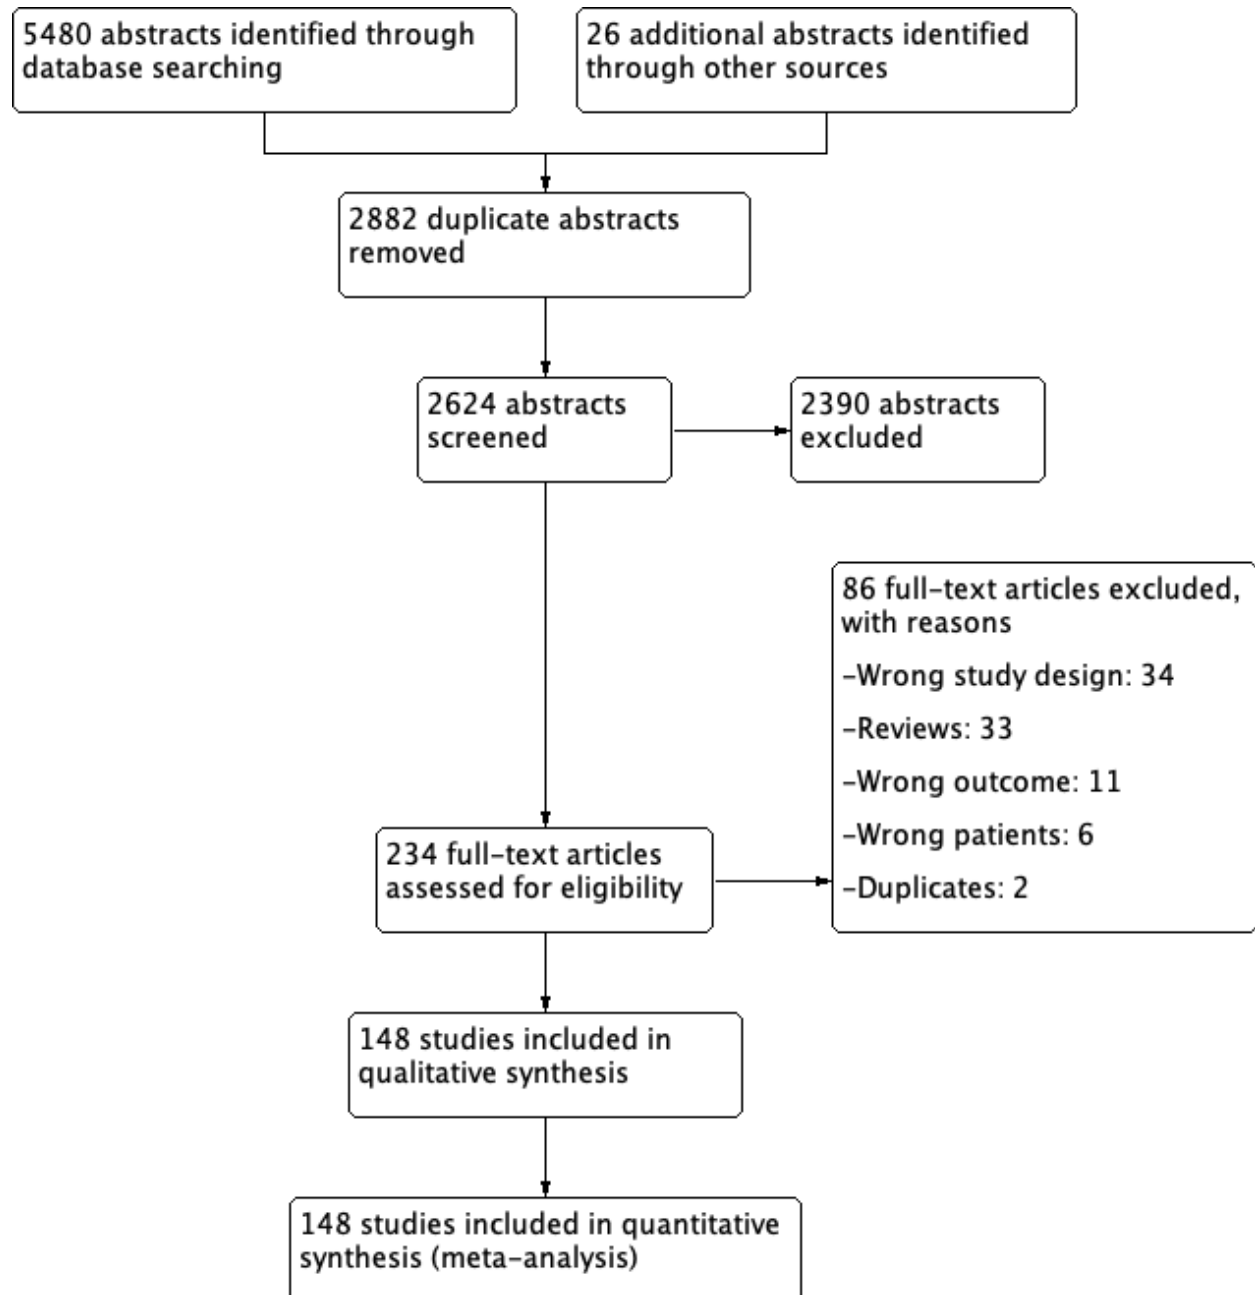

## Supplement 4: Meta-Analyses

## Epidemiology

## PICO 1

Table 1: Effect of dysphagia compared to no dysphagia on mortality, pneumonia, aspiration risk, and length of stay in hospital in patients with stroke

| Outcome                     | Incidence (%)/ Mean±SD |              | n (N)      | OR [95% CI]/<br>MD [95% CI] | I <sup>2</sup> | P value   |
|-----------------------------|------------------------|--------------|------------|-----------------------------|----------------|-----------|
|                             | Dysphagia              | No dysphagia |            |                             |                |           |
| <b>Mortality</b>            |                        |              |            |                             |                |           |
| • Mortality, hospital       | 19%                    | 1%           | 10(682884) | 9.77 [5.45, 17.50]          | 96%            | < 0.00001 |
| • Mortality, 1 month        | 21%                    | 3%           | 4(5600)    | 9.78 [7.67, 12.46]          | 0%             | < 0.00001 |
| • Mortality, 2 months       | 53%                    | 8%           | 2(314)     | 10.54 [0.92, 120.85]        | 93%            | 0.06      |
| • Mortality, 3 months       | 16%                    | 1%           | 5(13546)   | 9.02 [4.50, 18.09]          | 73%            | < 0.00001 |
| • Mortality, 6 months       | 33%                    | 10%          | 3(803)     | 8.64 [1.76, 42.41]          | 87%            | 0.008     |
| • Mortality, 1 year         | 42%                    | 32%          | 7(10737)   | 8.82 [3.56, 21.85]          | 98%            | < 0.00001 |
| • Mortality, 4 years        | 74%                    | 40%          | 1(1188)    | 4.28 [3.34, 5.47]           | NA             | < 0.00001 |
| <b>Pneumonia</b>            | 22%                    | 3%           | 31(767179) | 7.45 [6.01, 9.24]           | 94%            | < 0.00001 |
| <b>Tubing</b>               |                        |              |            |                             |                |           |
| • Nasogastric tube          | 41%                    | 1%           | 2(8171)    | 93.74 [24.33, 361.14]       | 35%            | < 0.00001 |
| • Percutaneous feeding tube | 9%                     | 0.1%         | 4(8446)    | 71.60 [34.38, 149.11]       | 0%             | < 0.00001 |
| <b>mRS</b>                  |                        |              |            |                             |                |           |
| • mRS 0, 1                  | 6%                     | 30%          | 2(5582)    | 0.20 [0.11, 0.35]           | 83%            | < 0.00001 |
| • mRS ≥2                    | 76%                    | 55%          | 3(17858)   | 2.34 [1.24, 4.40]           | 98%            | 0.08      |
| • mRS 4,5                   | 52%                    | 18%          | 1(5012)    | 5.03 [4.43, 5.72]           | NA             | < 0.00001 |
| <b>LOS</b>                  |                        |              |            |                             |                |           |
| • LOS, days                 | 12.1±9.7               | 8.4±6.2      | 14(697614) | 4.72 [3.53, 5.91]           | 99%            | < 0.00001 |
| • LOS, stroke unit          | 4.4±3.0                | 2.7±2.4      | 1(570)     | 1.70 [1.12, 2.28]           | NA             | < 0.00001 |
| <b>Swallowing</b>           |                        |              |            |                             |                |           |
| • Mann Score                | 135.3                  | 193.6        | 2(130)     | -57.35 [-77.04, -37.67]     | 97%            | < 0.0001  |
| • FOIS                      | 3.2                    | 6.8          | 2(172)     | -3.63 [-4.23, -3.03]        | 97%            | < 0.0001  |
| <b>Discharge status</b>     |                        |              |            |                             |                |           |
| • Discharged home           | 17%                    | 67%          | 8(678519)  | 0.17 [0.09, 0.35]           | 100%           | < 0.00001 |
| • Discharged to             | 49%                    | 26%          | 7(665094)  | 3.90 [2.93, 5.21]           | 81%            | < 0.00001 |

| <b>Institution/Palliative</b>         |     |     |           |                   |      |      |
|---------------------------------------|-----|-----|-----------|-------------------|------|------|
| • <b>Discharged to long term care</b> | 15% | 5%  | 2(663721) | 1.95 [0.71, 5.32] | 100% | 0.19 |
| • <b>Readmission, 1 year</b>          | 42% | 54% | 1(395)    | 0.62 [0.42, 0.93] | NA   | 0.02 |

CI: Confidence intervals; FOIS: Functional oral intake scale;  $I^2$ : Heterogeneity; LOS, Length of stay in hospital; MD: Mean difference; n: Number of studies; N: Number of patients; NIHSS: National Institute of Health Stroke Scale; p: Statistical significance value; OR: Odds Ratio; SD: Standard deviation

Figure: Effect of dysphagia compared to no dysphagia on mortality in patients with stroke

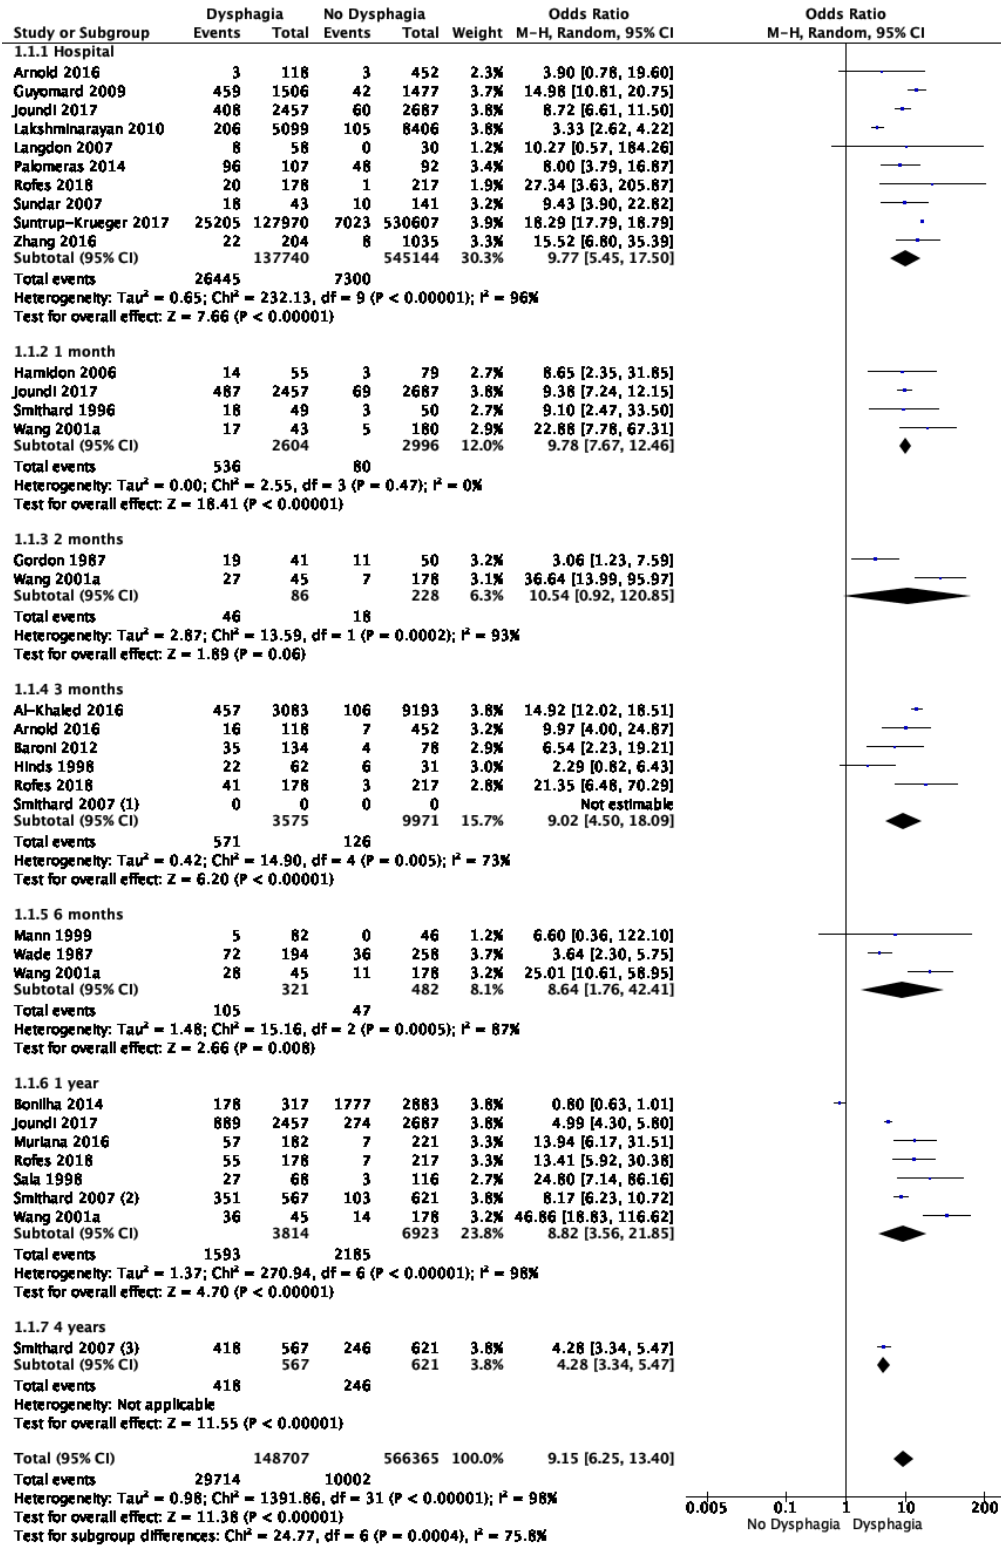

Footnotes

- (1) Dysphagia vs no dysphagia, OR 2.03, 95% CI (1.12–3.67)
- (2) Dysphagia vs no dysphagia, OR 1.60, 95% CI (0.98–2.63)
- (3) Dysphagia vs no dysphagia, OR 1.60, 95% CI (0.98–2.63)

Figure: Effect of dysphagia compared to no dysphagia on pneumonia in patients with stroke

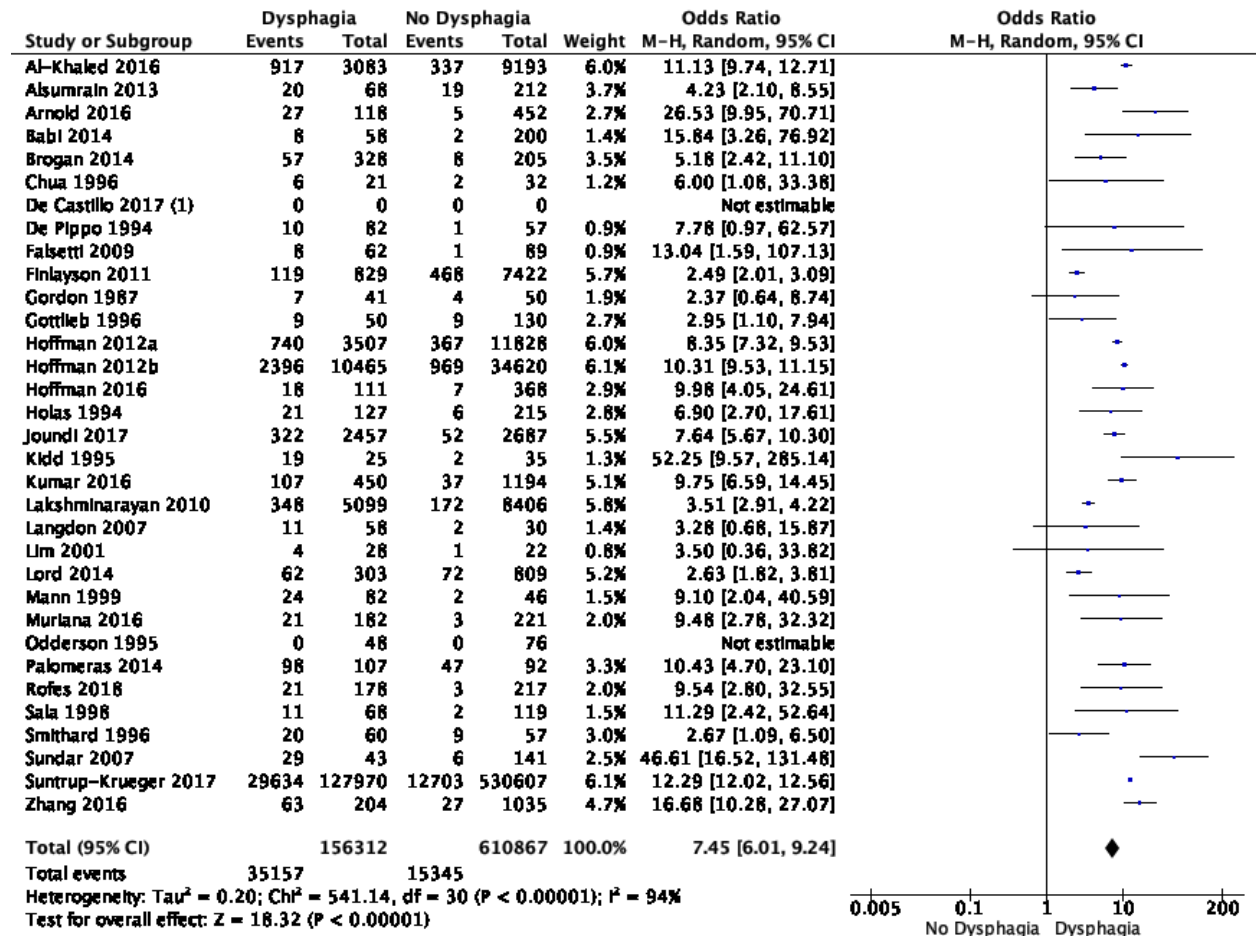

Footnotes

(1) Multivariate logistic regression analysis: Association of pneumonia with dysphagia OR = 5.20

Figure: Effect of dysphagia compared to no dysphagia on tubing in patients with stroke

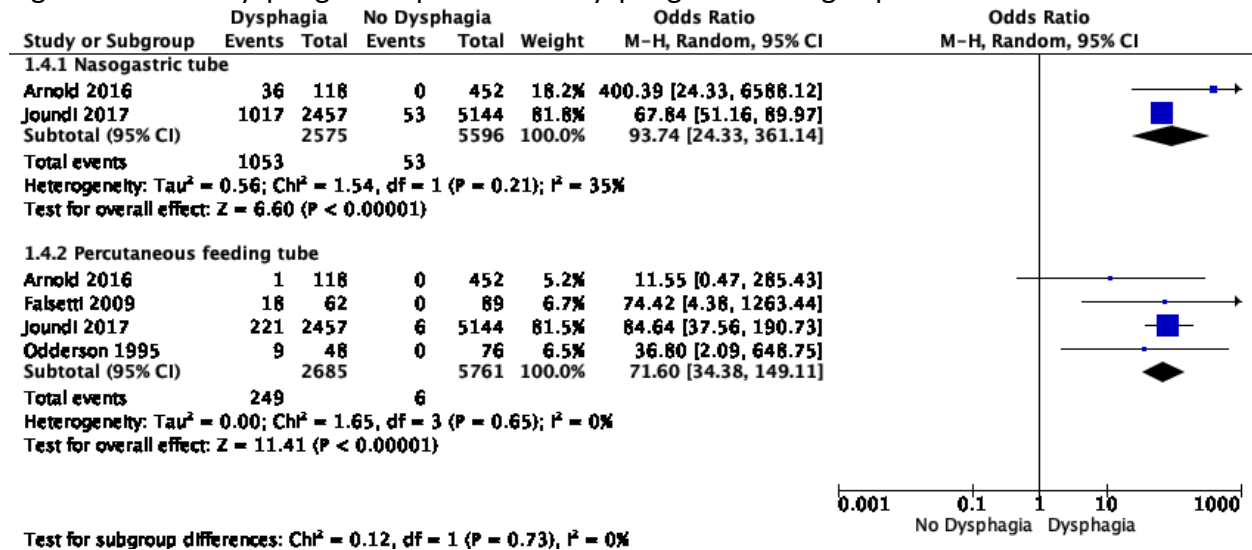

Figure: Effect of dysphagia compared to no dysphagia on mRS in patients with stroke

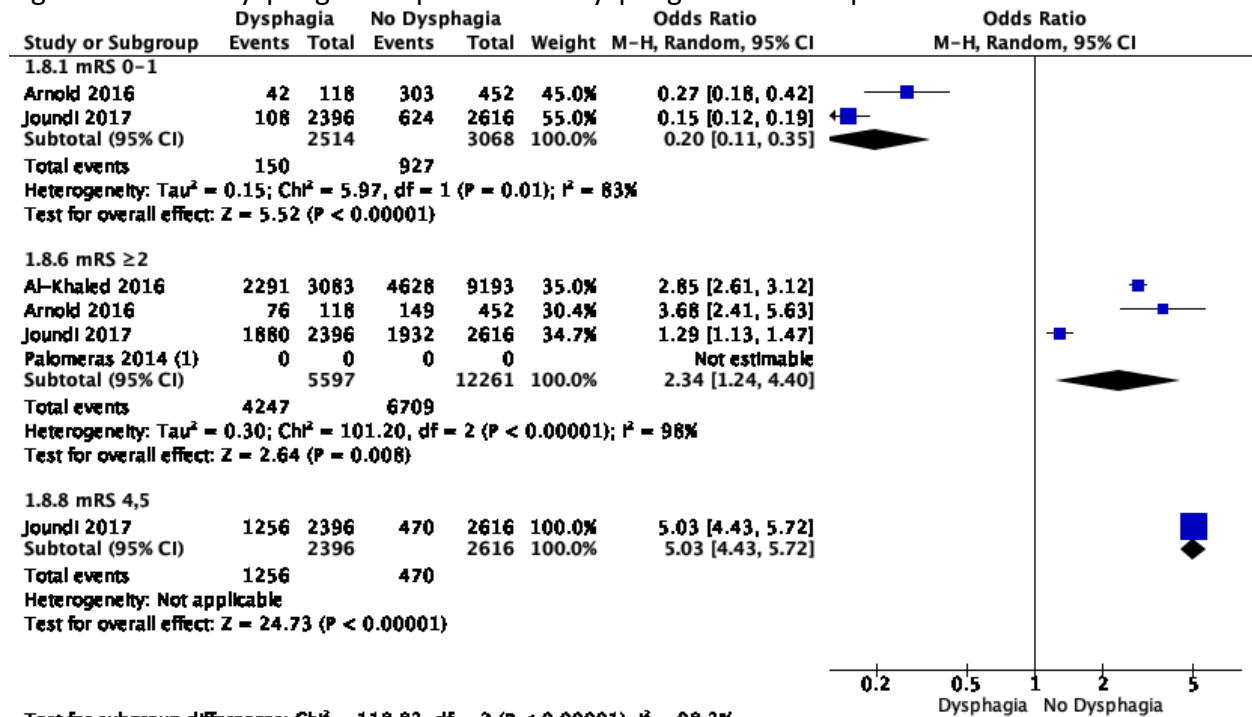

Footnotes

(1) Dysphagia vs dysphagia, p < 0.001

Figure: Effect of dysphagia compared to no dysphagia on length of stay in hospital or stroke unit in patients with stroke

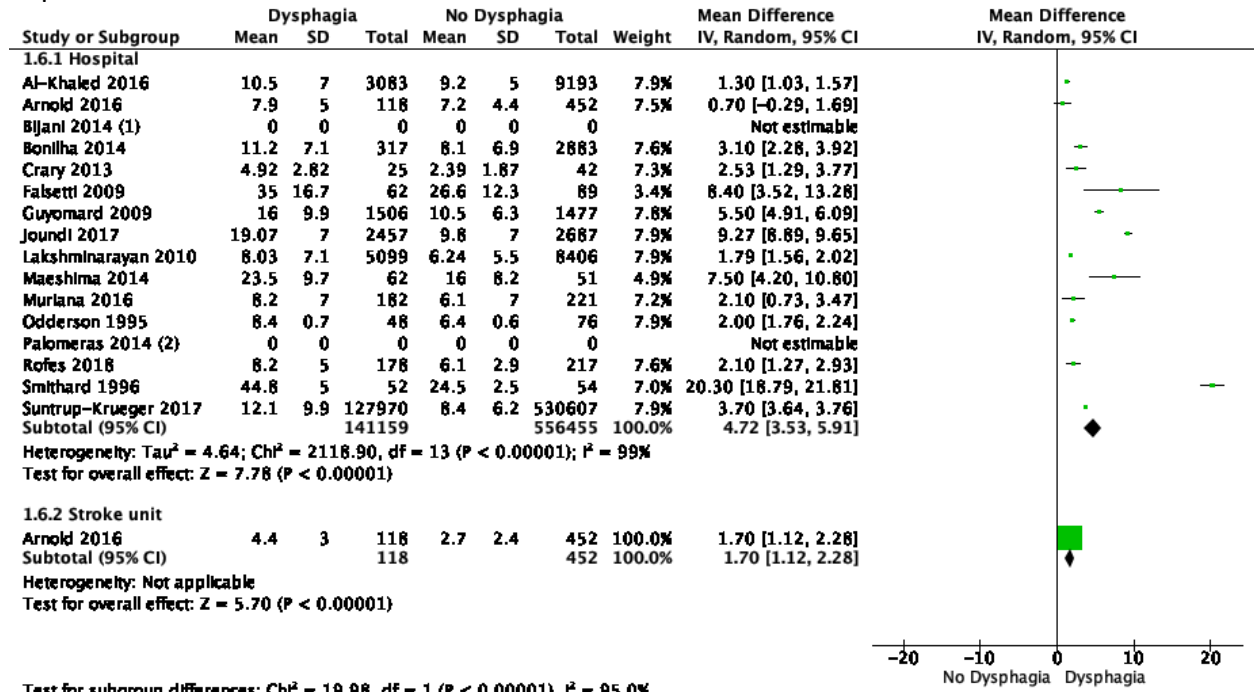

Test for subgroup differences:  $Chi^2 = 19.98$ ,  $df = 1$  ( $P < 0.00001$ ),  $I^2 = 95.0%$

**Footnotes**

- (1) Prolonged LOS and swallowing disorders: OR 6.69, 95% CI (3.73-12.01);  $p < 0.001$
- (2) Dysphagia vs dysphagia, longer stay in hospital,  $p = 0.016$

Figure: Effect of dysphagia compared to no dysphagia on swallowing functions in patients with stroke

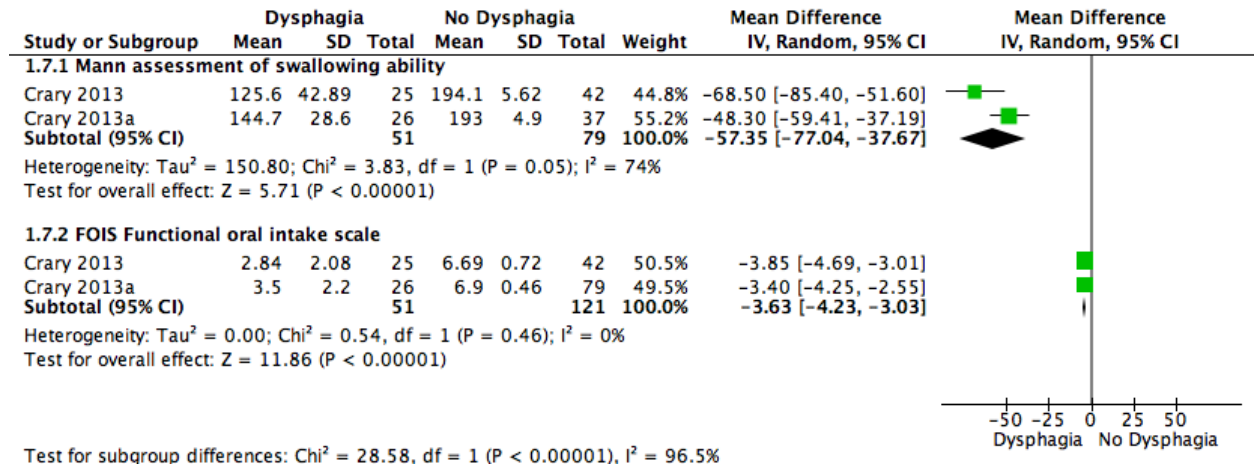

Test for subgroup differences:  $Chi^2 = 28.58$ ,  $df = 1$  ( $P < 0.00001$ ),  $I^2 = 96.5%$

Figure: Effect of dysphagia compared to no dysphagia on discharge status in patients with stroke

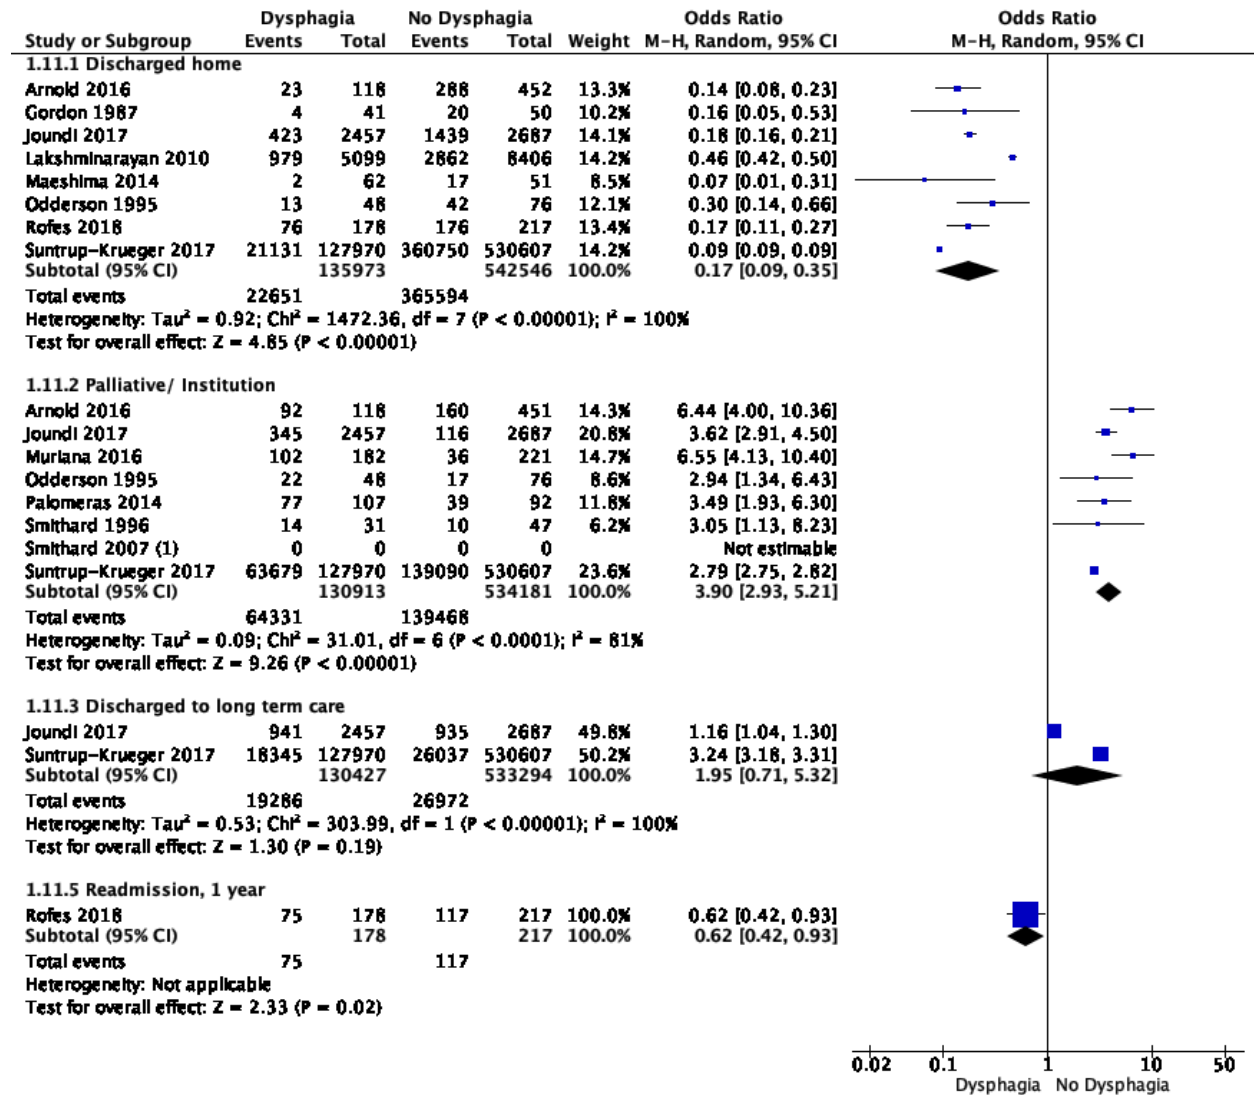

Footnotes

(1) Dysphagia vs no dysphagia, OR 1.73, 95% CI (1.02-2.95)



**Table 2:** Effect of dysphagia compared to no dysphagia on adverse effects and quality of life in patients with stroke

| Outcome                                          | Incidence (%) / Mean $\pm$ SD |                 | n (N)    | OR [95% CI] / MD [95% CI] | I <sup>2</sup> | P value  |
|--------------------------------------------------|-------------------------------|-----------------|----------|---------------------------|----------------|----------|
|                                                  | Dysphagia                     | No dysphagia    |          |                           |                |          |
| <b>Neurological worsening</b>                    | 25%                           | 7.0%            | 2(5774)  | 4.81 [2.94, 7.87]         | 51%            | <0.00001 |
| <b>Seizure</b>                                   | 2.9%                          | 0.9%            | 1(5144)  | 3.45 [2.15, 5.53]         | NA             | <0.00001 |
| <b>Depression</b>                                | 3.3%                          | 1.2%            | 1(5144)  | 2.86 [1.90, 4.33]         | NA             | <0.00001 |
| <b>Deep vein thrombosis</b>                      | 1.5%                          | 0.4%            | 1(5144)  | 3.62 [1.84, 7.12]         | NA             | 0.0002   |
| <b>Myocardial infarction</b>                     | 2.6%                          | 1.0%            | 1(5144)  | 2.54 [1.62, 3.97]         | NA             | <0.00001 |
| <b>Cardiac arrest</b>                            | 4.4%                          | 0.7%            | 1(5144)  | 6.75 [4.09, 11.16]        | NA             | <0.00001 |
| <b>Decubitus ulcer</b>                           | 1.9%                          | 0.2%            | 1(5144)  | 8.53 [3.63, 20.00]        | NA             | <0.00001 |
| <b>UTI</b>                                       | 6.7%                          | 0.9%            | 1(395)   | 7.77 [1.72, 35.20]        | NA             | 0.008    |
| <b>Gastrointestinal bleeding</b>                 | 2.4%                          | 0.6%            | 1(5144)  | 4.46 [2.53, 7.87]         | NA             | <0.00001 |
| <b>Ambulation, 2 days</b>                        | 24%                           | 38%             | 1(13505) | 0.53 [0.49, 0.57]         | NA             | <0.00001 |
| <b>Ambulation, discharge</b>                     | 27%                           | 46%             | 1(13505) | 0.43 [0.40, 0.46]         | NA             | <0.00001 |
| <b>Charlson comorbidity score</b>                | 3.5 $\pm$ 1.7                 | 3.3 $\pm$ 1.8   | 1(3200)  | 0.20 [0.00, 0.40]         | NA             | 0.05     |
| <b>Functional independence measure</b>           | 41.1 $\pm$ 18.6               | 71.3 $\pm$ 18.6 | 2(264)   | -37.01 [-75.23, 1.21]     | 99%            | 0.06     |
| <b>Functional independence measure-motor</b>     | 26.8 $\pm$ 11.9               | 40.1 $\pm$ 26.8 | 1(290)   | -13.30 [-17.75, -8.85]    | NA             | <0.00001 |
| <b>Functional independence measure-cognitive</b> | 15 $\pm$ 7.4                  | 22.7 $\pm$ 7.9  | 1(290)   | -7.70 [-9.59, -5.81]      | NA             | <0.00001 |

CI: Confidence intervals; I<sup>2</sup>: Heterogeneity; MD: Mean difference; n: Number of studies; N: Number of patients; p: Statistical significance value; OR: Odds Ratio; SD: Standard deviation; UTI: Urinary tract infections

Figure: Effect of dysphagia compared to no dysphagia on adverse events in patients with stroke

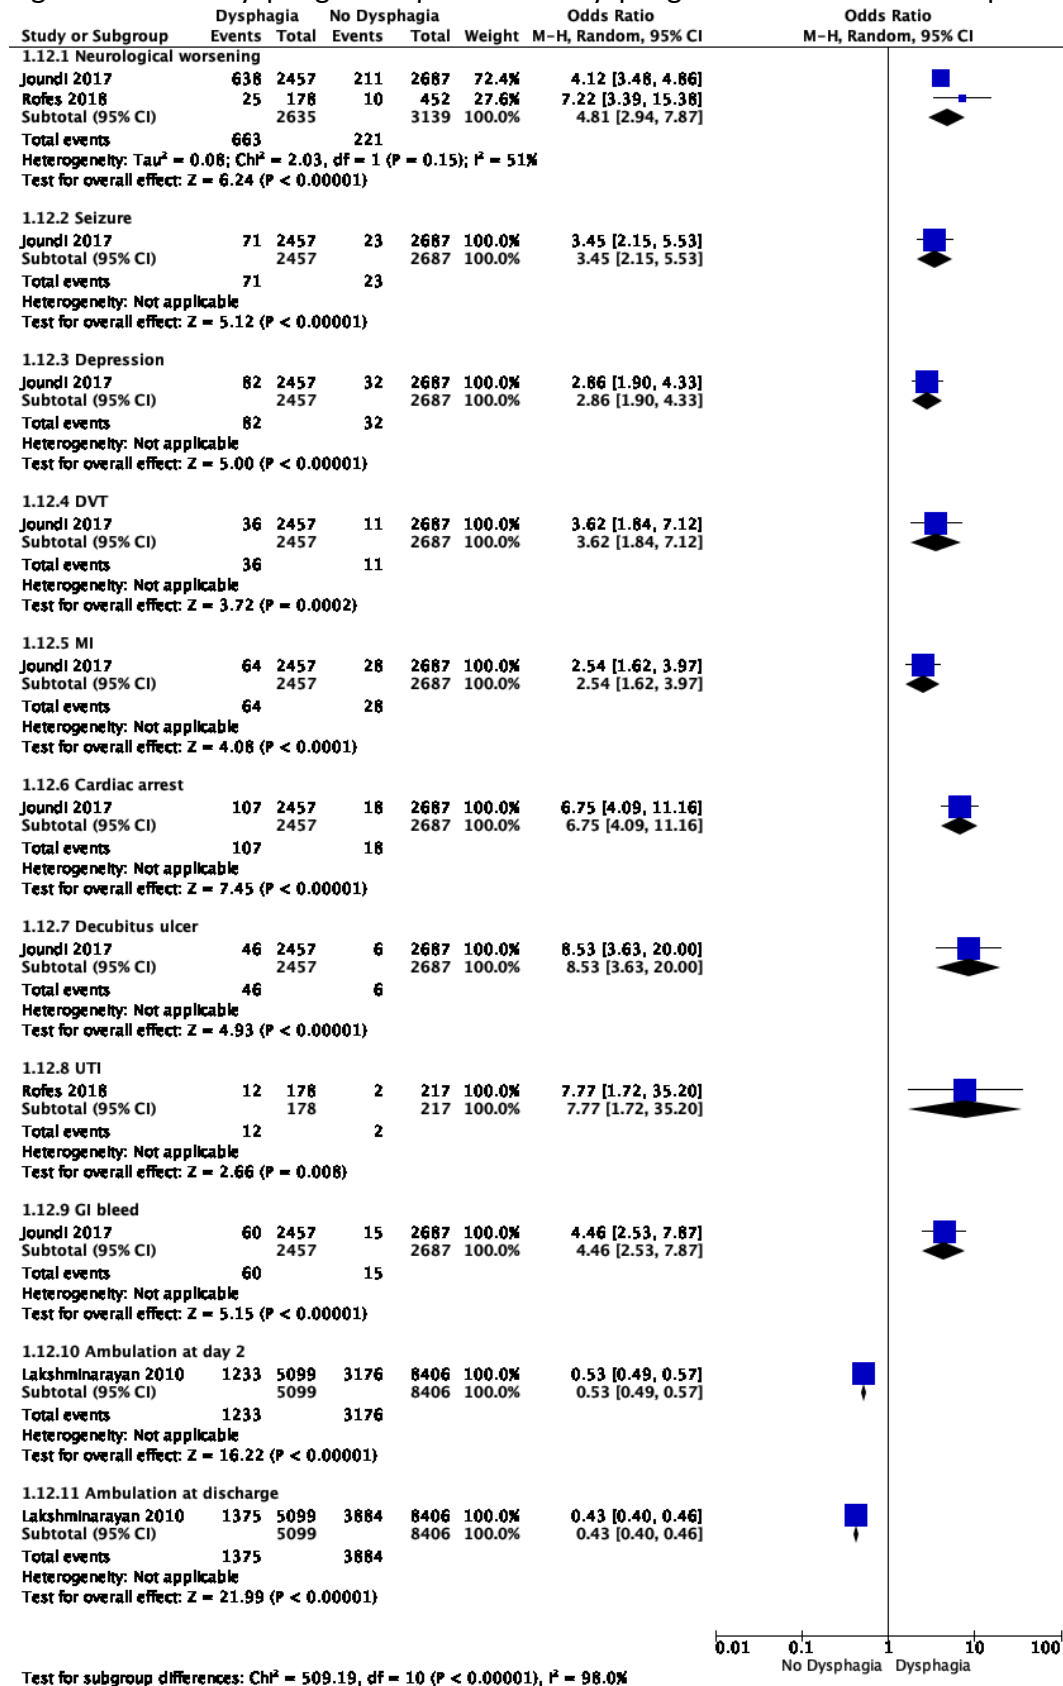

Figure: Effect of dysphagia compared to no dysphagia on Charlson comorbidity and quality of life in patients with stroke

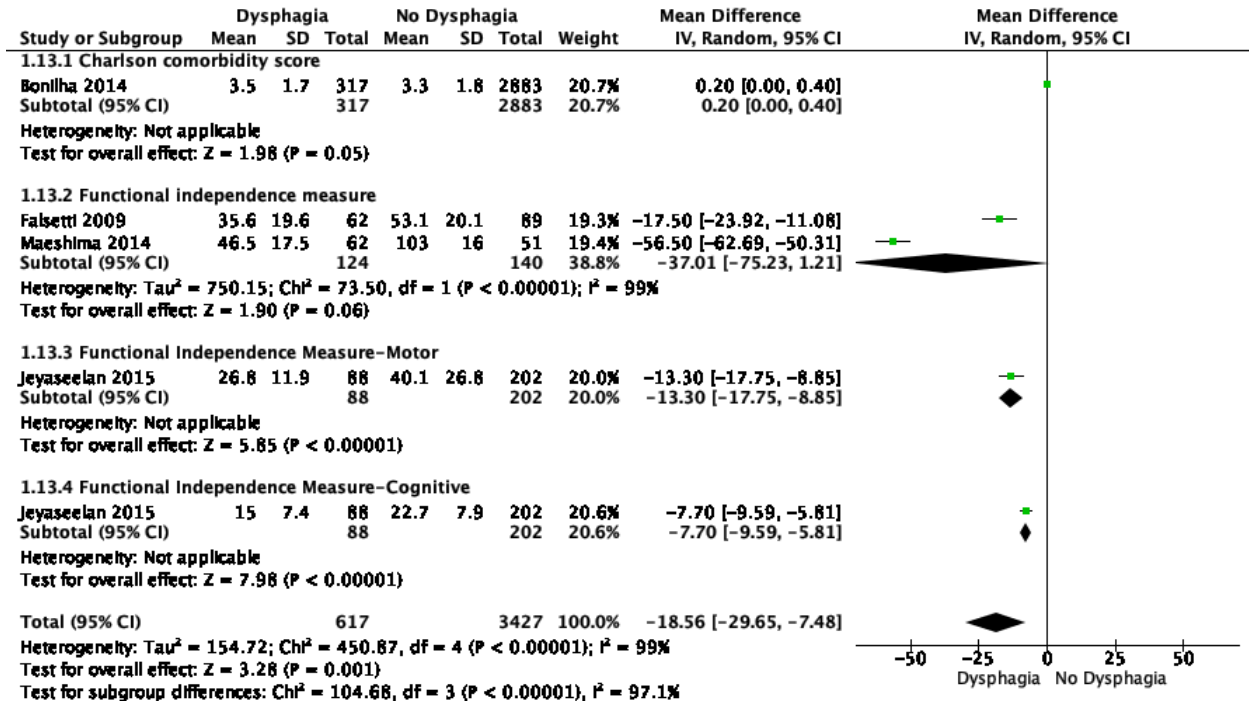

## Screening

**Table 1: Effect of screening compared to no screening on mortality, pneumonia, length of stay in hospital and discharge in patients with stroke**

| Outcome                            | Incidence (%)/ Mean±SD |              | n (N)      | OR [95% CI]/<br>MD [95% CI] | I <sup>2</sup> | P value      |
|------------------------------------|------------------------|--------------|------------|-----------------------------|----------------|--------------|
|                                    | Screening              | No Screening |            |                             |                |              |
| <b>Mortality</b>                   |                        |              |            |                             |                |              |
| • <b>Mortality, hospital</b>       | 2%                     | 4%           | 4(20806)   | 0.67 [0.45, 1.02]           | 57%            | 0.06         |
| • <b>Mortality, 1 month</b>        | 10%                    | 31%          | 3(66162)   | 0.57 [0.12, 2.80]           | 99%            | 0.49         |
| <b>Pneumonia</b>                   | 7%                     | 10%          | 11(536650) | 0.55 [0.36, 0.83]           | 99%            | 0.004        |
| <b>Nasogastric tube, insertion</b> | 44%                    | 53%          | 3(459)     | 0.86 [0.51, 1.45]           | 0%             | 0.58         |
| <b>Endotracheal tube insertion</b> | 7%                     | 9%           | 2(260)     | 0.66 [0.27, 1.63]           | 0%             | 0.37         |
| <b>LOS, days</b>                   | 7.2±6.4                | 6.2±5.3      | 5(21005)   | 0.02 [-2.22, 2.26]          | 99%            | 0.99         |
| <b>Barthel Index Score</b>         | 19.74±29.9             | 12.89±23.6   | 1(84)      | 6.85 [-4.79, 18.49]         | NA             | 0.25         |
| <b>Adverse effects</b>             |                        |              |            |                             |                |              |
| • <b>UTI</b>                       | 5%                     | 6%           | 1(67672)   | 0.79 [0.60, 1.05]           | NA             | 0.10         |
| • <b>Temperature ≥ 38</b>          | 43%                    | 41%          | 1(176)     | 1.11 [0.61, 2.04]           | NA             | 0.73         |
| <b>Discharge</b>                   |                        |              |            |                             |                |              |
| • <b>Discharged home</b>           | 29%                    | 33%          | 2(20348)   | 0.84 [0.79, 0.90]           | 0%             | <<br>0.00001 |
| • <b>Discharged to Institution</b> | 20%                    | 19%          | 1(2334)    | 1.08 [0.86, 1.35]           | NA             | 0.53         |
| • <b>Skilled nursing facility</b>  | 14%                    | 11%          | 1(2334)    | 1.27 [0.97, 1.66]           | NA             | 0.09         |
| • <b>Hospice</b>                   | 2%                     | 3%           | 1(2334)    | 0.78 [0.43, 1.39]           | NA             | 0.39         |
| • <b>Other hospitals</b>           | 6%                     | 5%           | 1(2334)    | 1.28 [0.86, 1.92]           | NA             | 0.23         |
| • <b>Ambulation, 2 days</b>        | 33%                    | 44%          | 1(18014)   | 0.61 [0.57, 0.66]           | NA             | <<br>0.00001 |
| • <b>Ambulation, at discharge</b>  | 39%                    | 42%          | 1(18014)   | 0.88 [0.82, 0.94]           | NA             | 0.0002       |

CI: Confidence intervals; I<sup>2</sup>: Heterogeneity; LOS, Length of stay in hospital; MD: Mean difference; n: Number of studies; N: Number of patients; p: Statistical significance value; OR: Odds Ratio; SD: Standard deviation

**Figure 1: Effect of screening compared to no screening on mortality in patients with stroke**

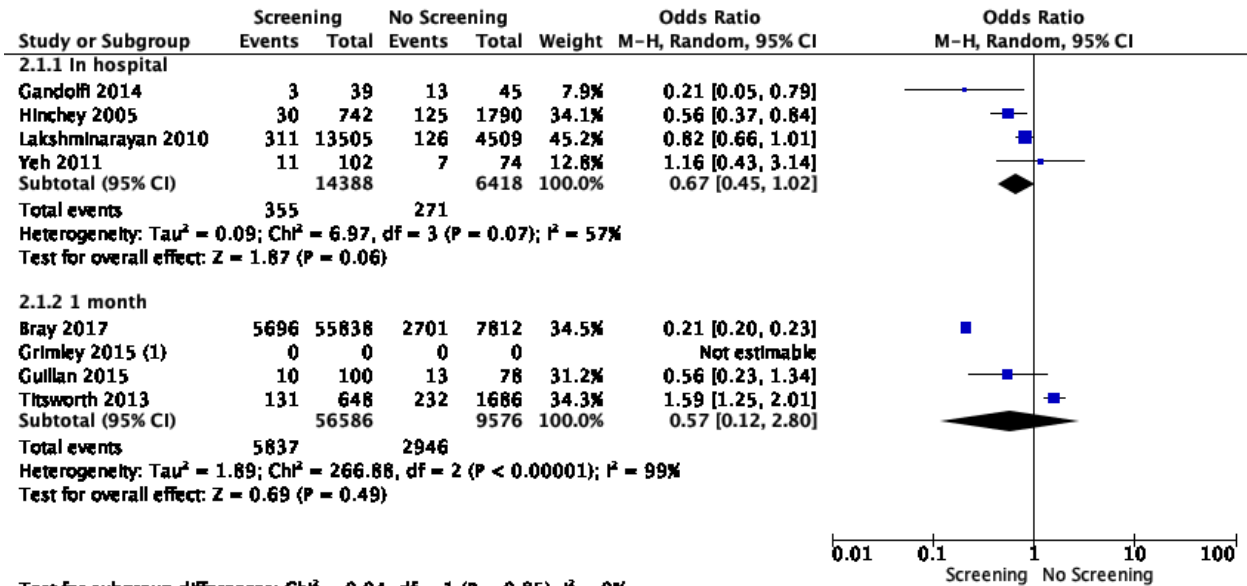

Figure 2: Effect of screening compared to no screening on pneumonia in patients with stroke

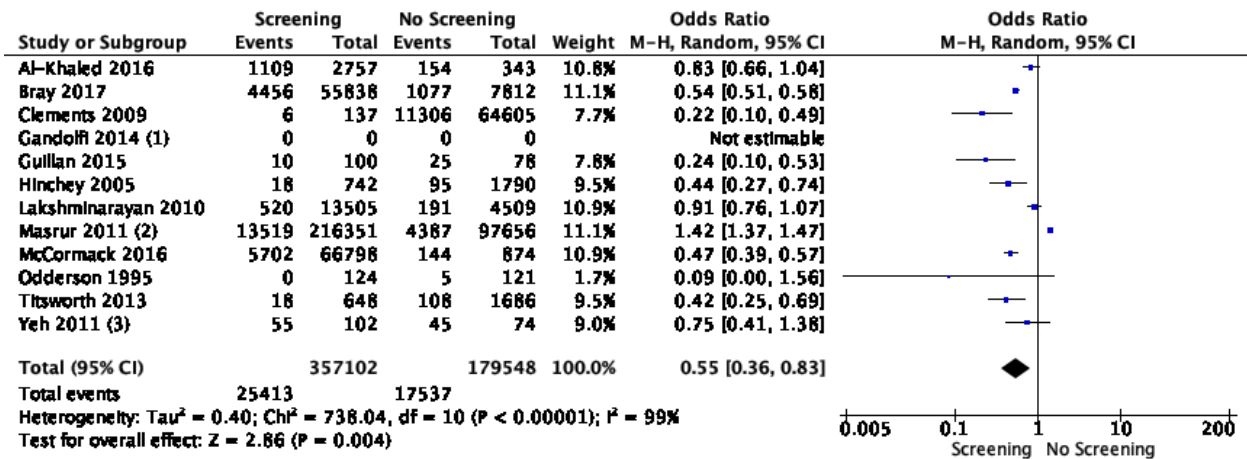

Figure 3: Effect of screening compared to no screening on intubation and requirement of oxygen in patients with stroke

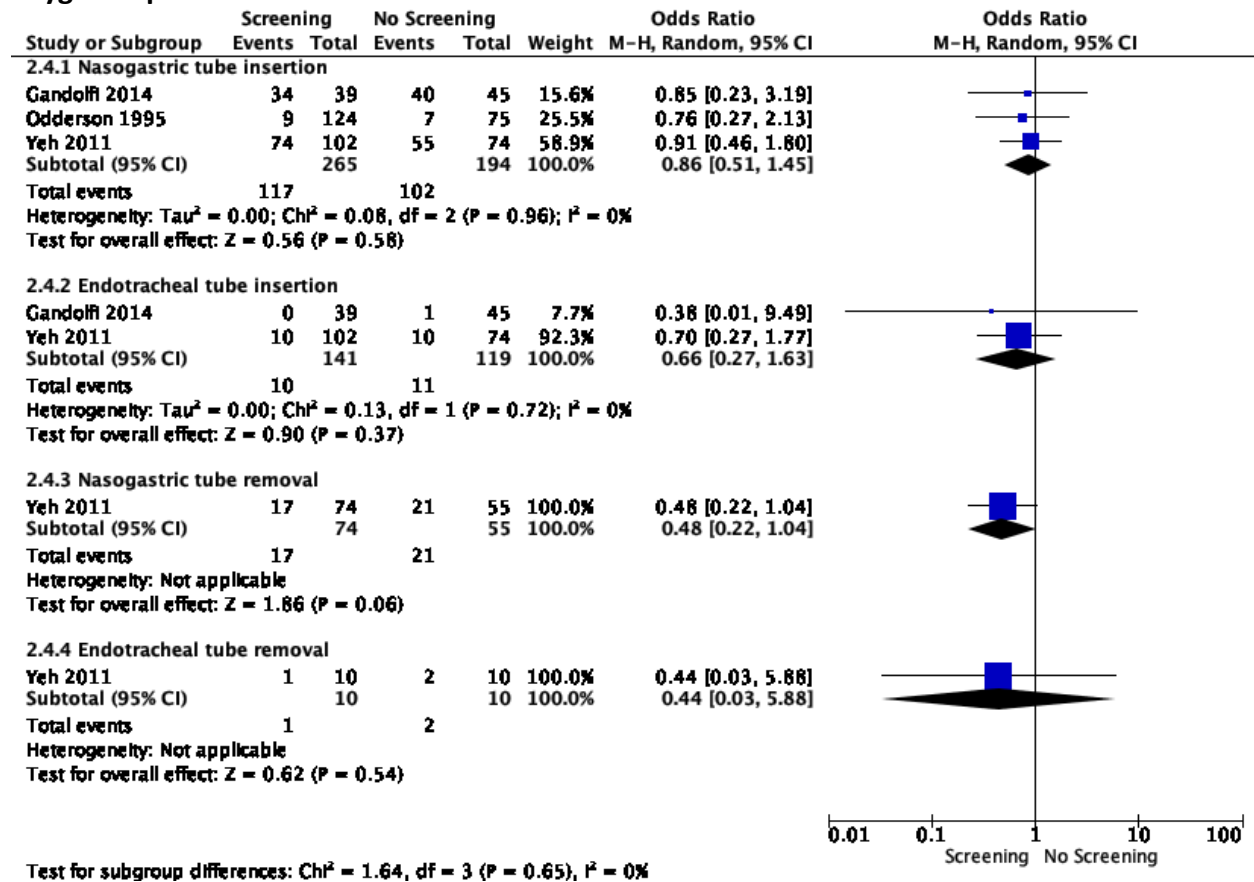

Figure 4: Effect of screening compared to no screening on length of stay in hospital in patients with stroke

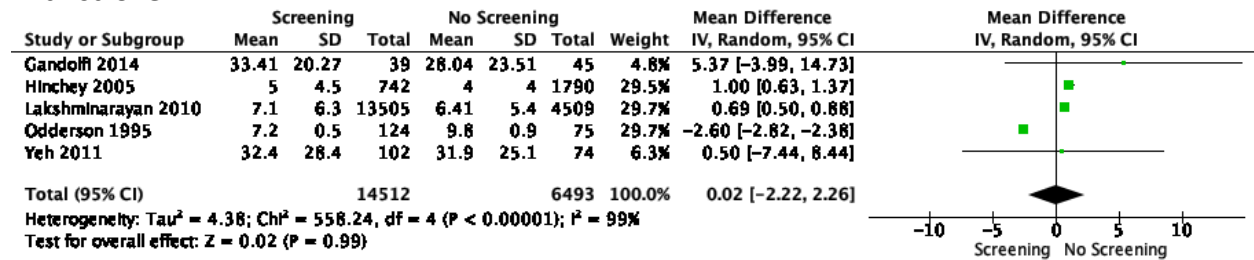

**Figure 5: Screening vs no screening and intubation and Barthel index and Rankin score in patients with stroke**

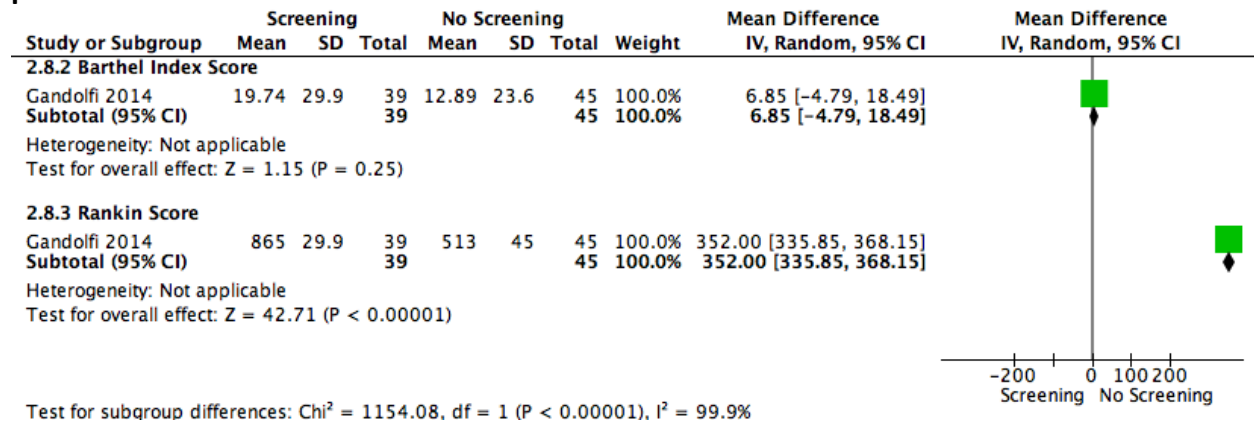

**Figure 6: Effect of screening compared to no screening on urinary tract infection and temperature in patients with stroke**

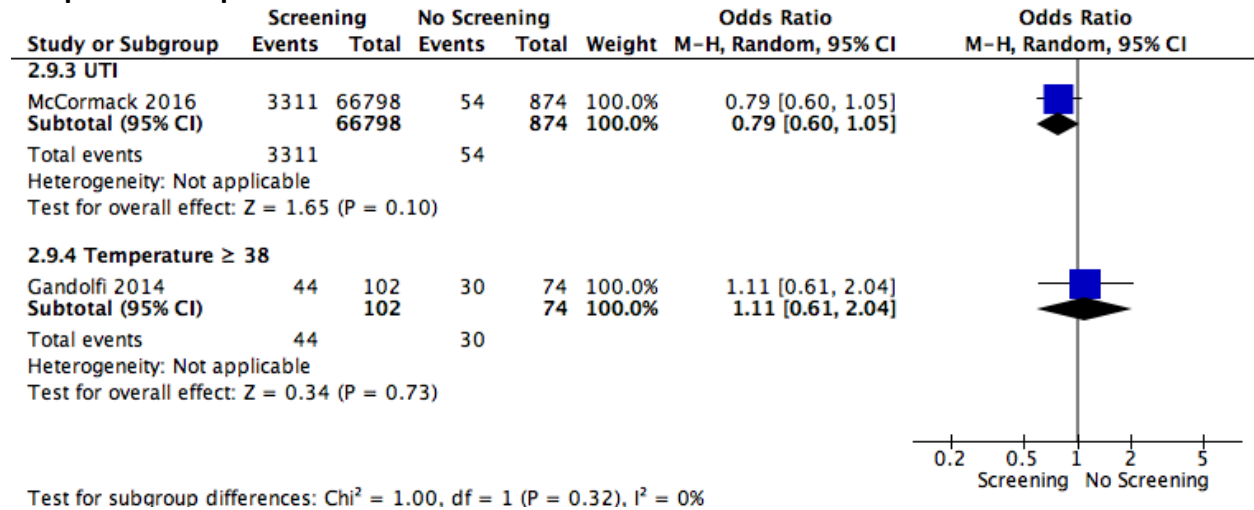

Figure 7: Effect of screening compared to no screening on discharge and ambulation in patients with stroke

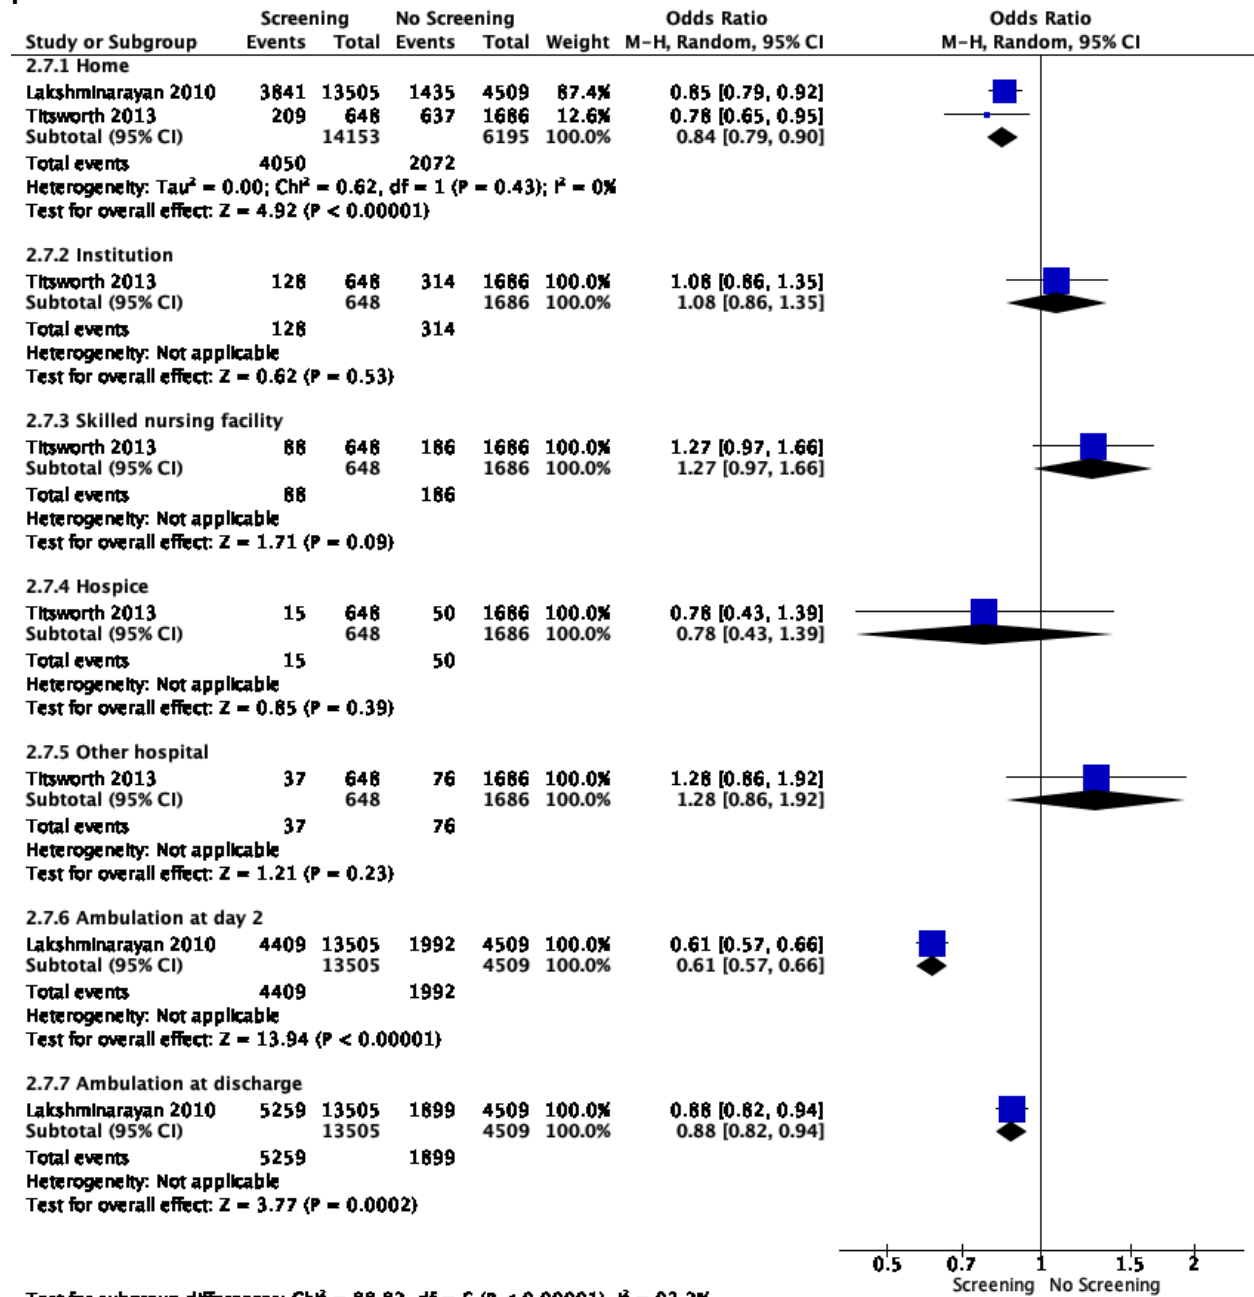



**Table 1: Effect of early screening compared to late screening on mortality, pneumonia, length of stay in hospital and discharge in patients with stroke**

| Outcome                               | Incidence (%)/ Mean±SD |                | n (N)     | OR [95% CI]/<br>MD [95% CI] | I <sup>2</sup> | P value   |
|---------------------------------------|------------------------|----------------|-----------|-----------------------------|----------------|-----------|
|                                       | Early Screening        | Late Screening |           |                             |                |           |
| <b>Mortality</b>                      |                        |                |           |                             |                |           |
| • Overall                             | 15%                    | 23%            | 7(144307) | 0.62 [0.43, 0.91]           | 99%            | 0.01      |
| • Mortality, hospital/ 7 days         | 5%                     | 6%             | 4(55969)  | 0.74 [0.61, 0.89]           | 75%            | 0.002     |
| • Mortality, 1 month                  | 11%                    | 16%            | 5(140614) | 0.66 [0.42, 1.02]           | 99%            | 0.06      |
| • Mortality, 6 months                 | 33%                    | 48%            | 1(146)    | 0.51 [0.26, 1.03]           | 0%             | 0.06      |
| • Mortality, 1 year                   | 26%                    | 27%            | 2(52276)  | 0.94 [0.90, 0.97]           | 0%             | 0.0009    |
| <b>Pneumonia</b>                      | 9%                     | 15%            | 10(96367) | 0.45 [0.35, 0.58]           | 83%            | < 0.00001 |
| <b>Feeding tube</b>                   |                        |                |           |                             |                |           |
| • Nasogastric tube feeding            | 38%                    | 52%            | 2(146)    | 0.52 [0.26, 1.04]           | 0%             | 0.07      |
| • PEG                                 | 14%                    | 9%             | 2(146)    | 1.70 [0.51, 5.74]           | 8%             | 0.39      |
| <b>LOS, days</b>                      | 23.8±9.5               | 27.6±9.2       | 6(56085)  | -2.27 [-3.12, -1.43]        | 92%            | < 0.00001 |
| <b>Barthel Index Score, 1 week</b>    | 15±36                  | 7±18           | 1(116)    | 8.00 [-2.36, 18.36]         | NA             | 0.13      |
| <b>Barthel Index Score, discharge</b> | 17±43                  | 12±28          | 1(116)    | 5.00 [-8.21, 18.21]         | NA             | 0.46      |
| <b>ADR</b>                            |                        |                |           |                             |                |           |
| • UTI                                 | 0%                     | 0%             | 1(116)    | 1.15 [0.55, 2.40]           | NA             | 0.71      |
| <b>Discharge</b>                      |                        |                |           |                             |                |           |
| • Discharged home                     | 57%                    | 53%            | 2(52276)  | 1.16 [1.08, 1.26]           | 79%            | < 0.0001  |
| • Readmission                         | 2%                     | 6%             | 1(138)    | 0.35 [0.06, 2.19]           | NA             | 0.69      |
| <b>mRS</b>                            |                        |                |           |                             |                |           |
| • mRS, 4-5                            | 28%                    | 39%            | 1(3309)   | 0.59 [0.50, 0.71]           | NA             | 0.00001   |

CI: Confidence intervals; I<sup>2</sup>: Heterogeneity; LOS, Length of stay in hospital; MD: Mean difference; n: Number of studies; N: Number of patients; p: Statistical significance value; PEG: Percutaneous endoscopic gastrostomy; OR: Odds Ratio; SD: Standard deviation

Figure 1: Effect of early vs late screening for dysphagia on mortality in patients with stroke

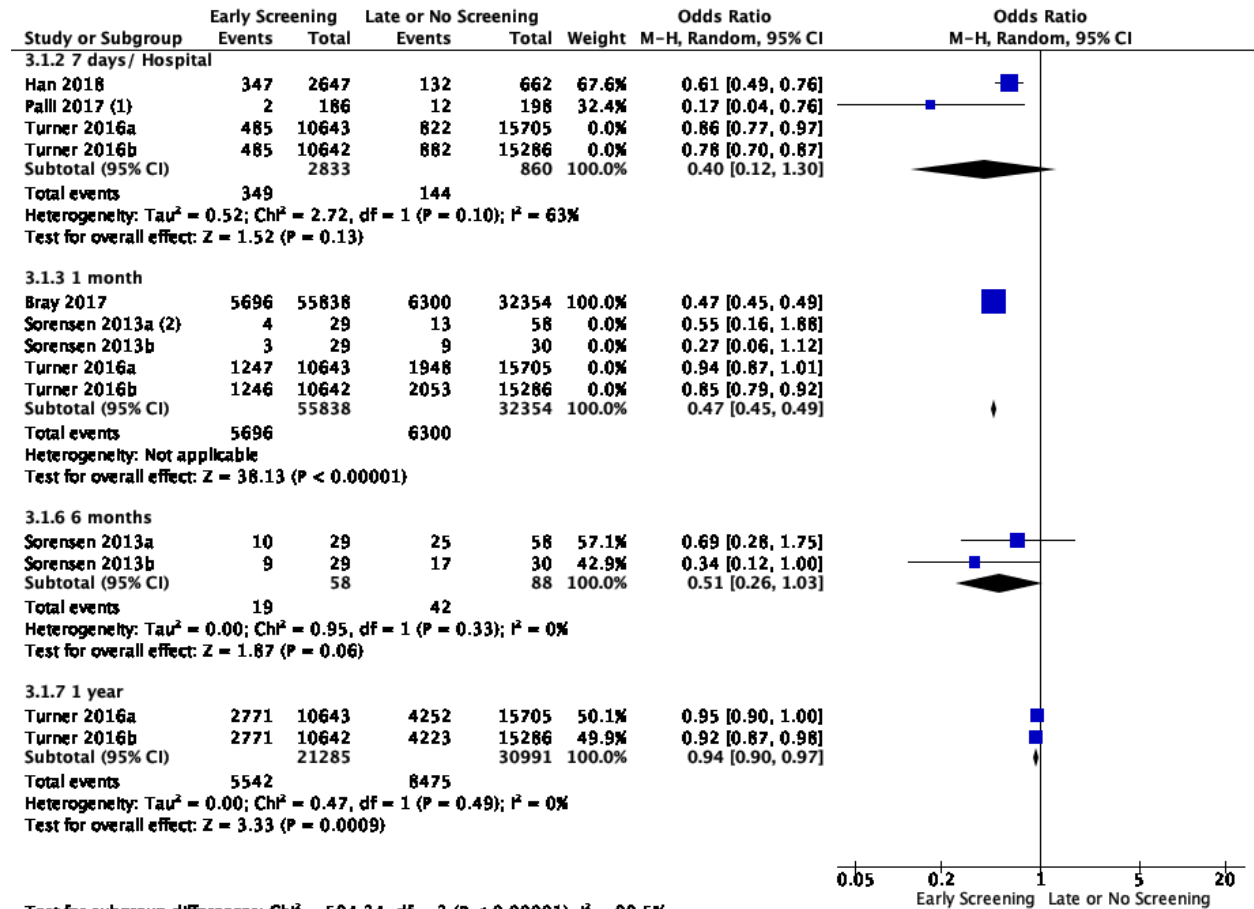

Footnotes

- (1) Gugging Swallowing Screen 24/7 dysphagia screening vs speech-language therapists during regular working hours
- (2) Dysphagia screening within 24 hours 98% vs 72%

Figure 2: Effect of early vs late screening for dysphagia on pneumonia in patients with stroke

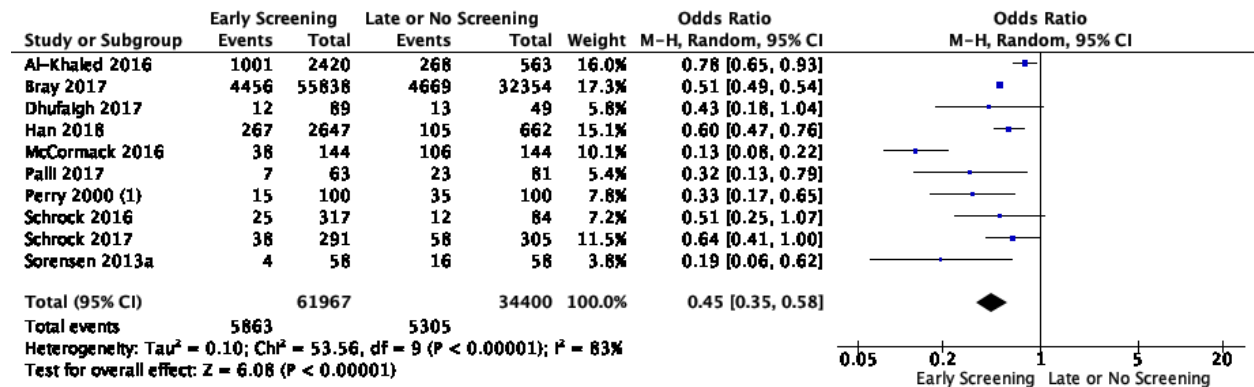

Footnotes

- (1) Following the guideline of early screening for dysphagia vs no (3 vs 4 days)

**Figure 3: Effect of early vs late screening for dysphagia on nasogastric tubing or percutaneous gastroscopy in patients with stroke**

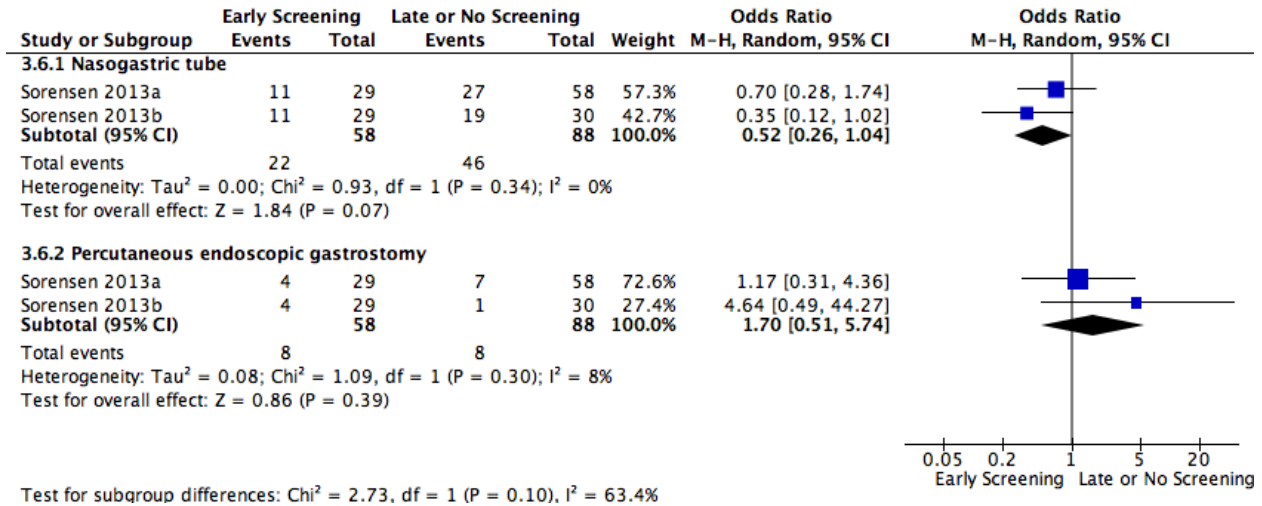

**Figure 4: Effect of early vs late screening for dysphagia on length of stay in patients with stroke**

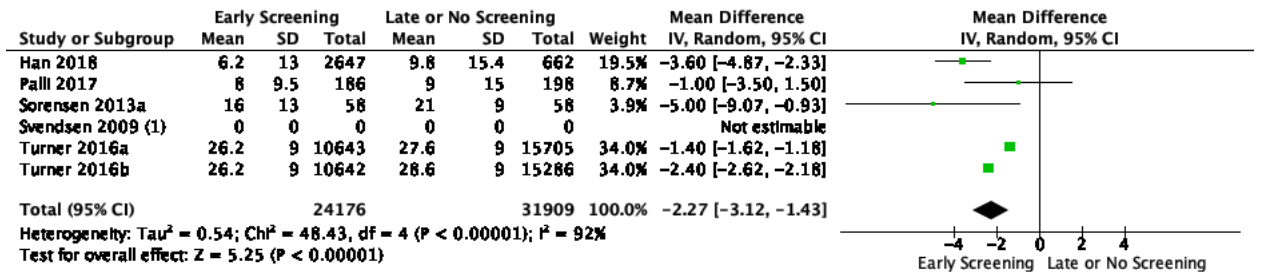

**Footnotes**

(1) Higher quality of care (Screening and other interventions) are associated with shorter LOS

**Figure 5: Effect of early vs late screening for dysphagia on Barthel score in patients with stroke**

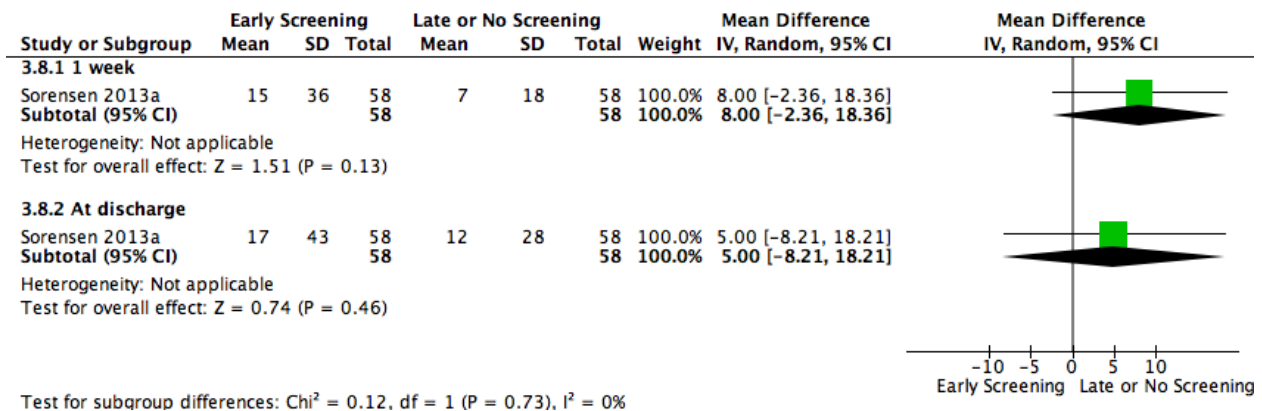

**Figure 6: Effect of early vs late screening for dysphagia on urinary tract infections in patients with stroke**

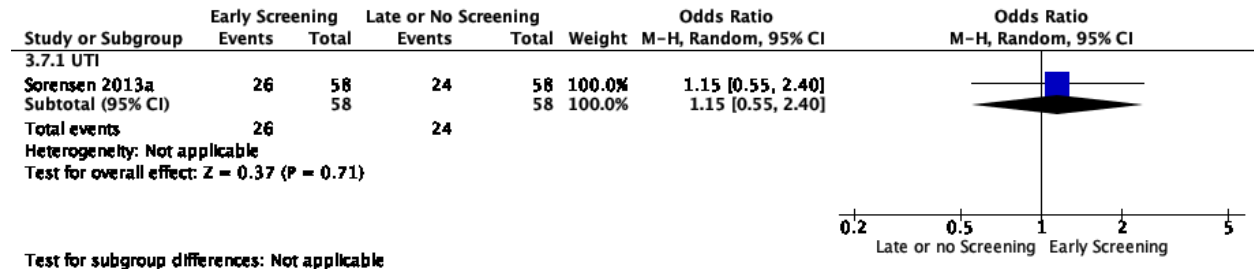

**Figure 7: Effect of early vs late screening for dysphagia on discharge and readmission in patients with stroke**

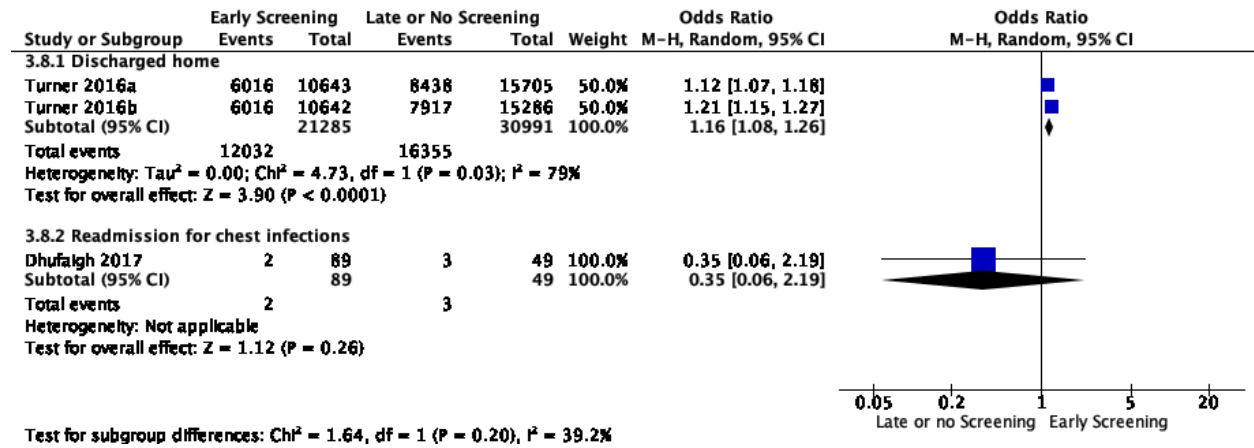

**Figure 8: Effect of early vs late screening for dysphagia on mRS in patients with stroke**

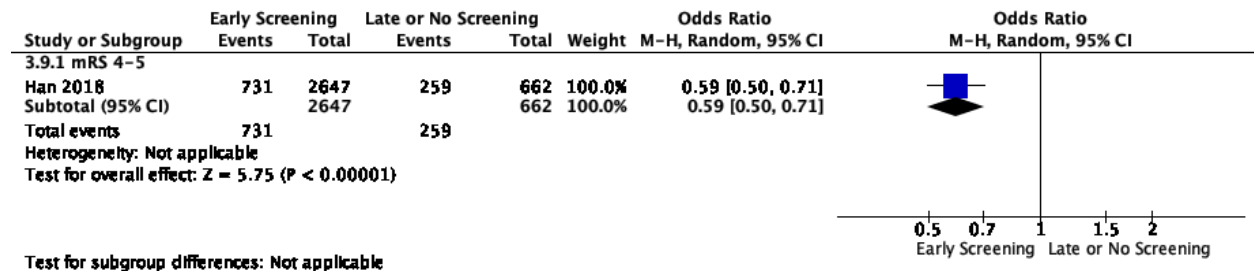

Assessment

**Table 1: Effect of early assessment compared to late assessment on pneumonia and discharge in patients with stroke**

| Outcome                  | Incidence (%)/ Mean±SD |                                 | n (N)    | OR [95% CI]/ MD [95% CI]                                                        | I <sup>2</sup> | P value |
|--------------------------|------------------------|---------------------------------|----------|---------------------------------------------------------------------------------|----------------|---------|
|                          | Early assessment       | Late assessment                 |          |                                                                                 |                |         |
| Pneumonia                | NR*                    | 40%-100% more compared to early | 1(24542) | 0.60 (0.40-0.78) at < 6 hr vs 2-24 hr<br>0.40 (0.16-0.59) at < 6 hr vs 24-48 hr | NA             | <0.0001 |
|                          | 12.8%**                | 26.5%                           | 1(135)   | 0.41 [0.17, 0.99]                                                               | NA             | 0.05    |
| Improvement of dysphagia | 1.5                    | 0.6                             | 1(135)   | Not reported                                                                    | NA             | NA      |

\*: Bray 2017; \*\*: Dhufaigh 2017; CI: Confidence intervals; I<sup>2</sup>: Heterogeneity; MD: Mean difference; n: Number of studies; N: Number of patients; NA: Not applicable; p: Statistical significance value; OR: Odds Ratio; SD: Standard deviation

**Figure 1: Pneumonia with early or late assessment of dysphagia in patients with acute or subacute stroke**

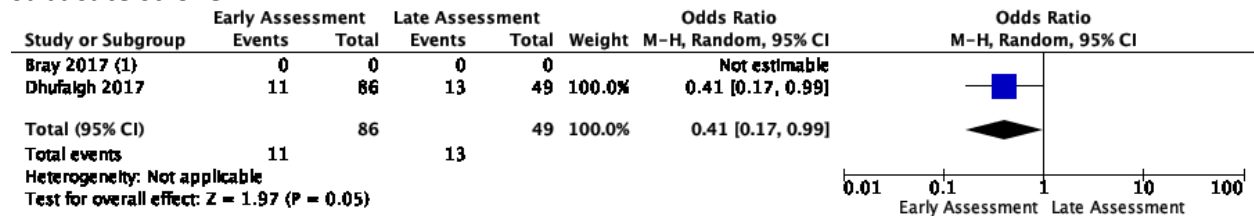

Footnotes

(1) Early vs late: OR: 0.60 (0.40-0.78) at < 6 hr vs 6-24 hr; OR: 0.40 (0.16-0.59) at < 6 hr vs 24-48 hr

**Figure 2: Improvement in Dysphagia with early or late assessment of dysphagia in patients with acute or subacute stroke**

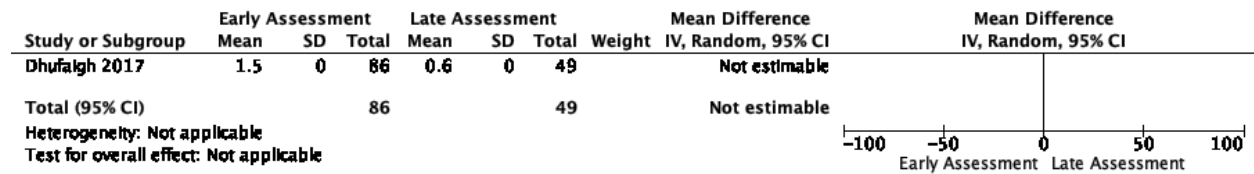

**Table 2: Effect of clinical bedside assessment compared to instrumental assessment on mortality, pneumonia tube removal, discharge and LOS in patients with stroke**

| Outcome                           | Incidence (%)               |                         | n (N)  | OR [95% CI]          | I <sup>2</sup> | P value |
|-----------------------------------|-----------------------------|-------------------------|--------|----------------------|----------------|---------|
|                                   | Clinical bedside assessment | Instrumental assessment |        |                      |                |         |
| Mortality                         | 10.5%                       | 7.3%                    | 1(440) | 1.49 [0.76, 2.90]    | NA             | 0.24    |
| Pneumonia                         | 12.3%                       | 6.4%                    | 1(440) | 2.06 [1.05, 4.04]    | NA             | 0.04    |
| Correct judgement in Tube removal | 62.5.0%                     | 100%                    | 1(32)  | 0.05 [0.00, 0.96]    | NA             | 0.05    |
| Discharge, home                   | 43.6%                       | 46.4%                   | 1(440) | 0.90 [0.62, 1.30]    | NA             | 0.57    |
| Discharge, on standard diet       | 51.1%                       | 65.6%                   | 1(378) | 0.47 [0.31, 0.71]    | NA             | 0.004   |
| LOS, days                         | 17.3±15.2                   | 23.7±20.2               | 1(440) | -6.33 [-9.67, -2.99] | NA             | 0.0002  |

CI: Confidence intervals; I<sup>2</sup>: Heterogeneity; n: Number of studies; N: Number of patients; NA: Not applicable; p: Statistical significance value; OR: Odds Ratio

**Figure 3: Effect of clinical bedside assessment compared to instrumental assessment on mortality in patients with stroke**

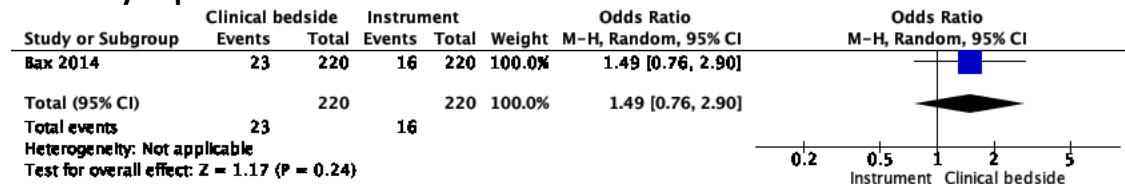

**Figure 4: Effect of clinical bedside assessment compared to instrumental assessment on pneumonia in patients with stroke**

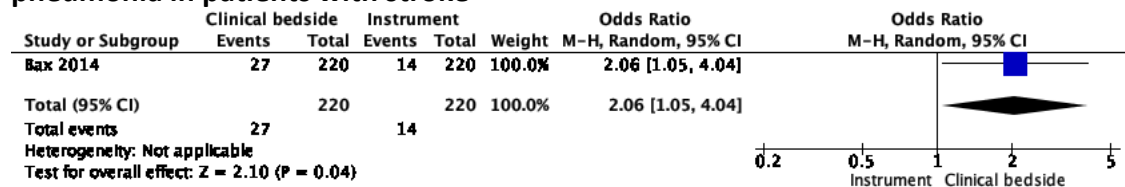

**Figure 5: Effect of clinical bedside assessment compared to instrumental assessment on discharge in patients with stroke**

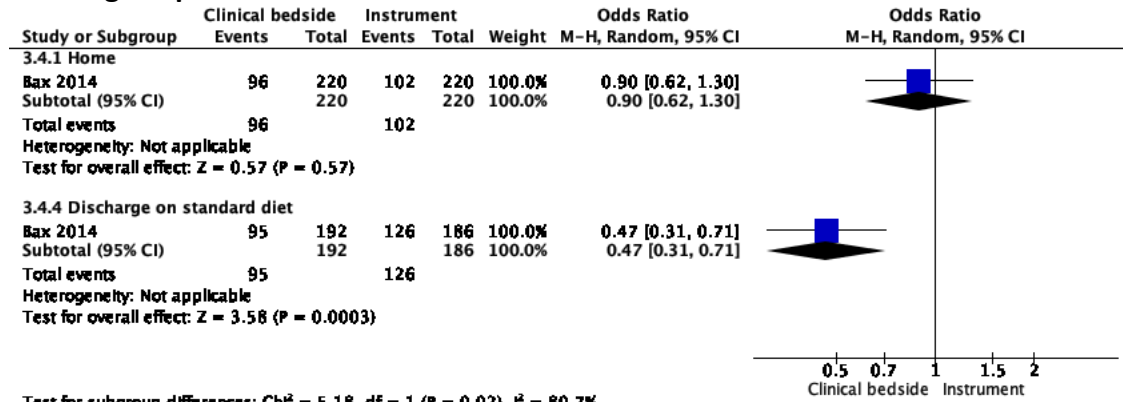

**Figure 6: Effect of clinical bedside assessment compared to instrumental assessment on length of stay in hospital in patients with stroke**

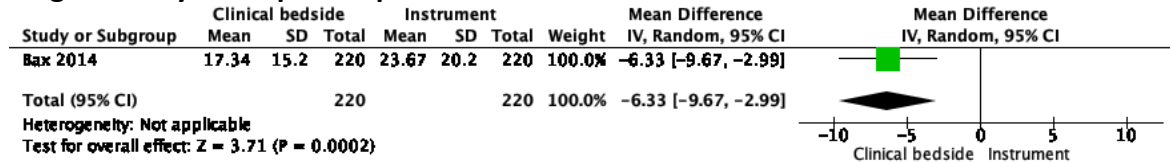

**Table 3: Effect of clinical bedside assessment compared to instrumental assessment in patients with stroke**

| Outcome   | Incidence (%)                     |       | n (N) | OR [95% CI]        | I <sup>2</sup> | P value |
|-----------|-----------------------------------|-------|-------|--------------------|----------------|---------|
|           | Instrumental assessment with VFSS | FEES  |       |                    |                |         |
| Pneumonia | 29.2%                             | 4.8%  | 1(45) | 8.24 [0.92, 73.79] | NA             | 0.06    |
| PEG       | 2.6%                              | 23.8% | 1(99) | 0.08 [0.01, 0.47]  | NA             | 0.005   |

CI: Confidence intervals; Diet: Non-oral feeding: 1-3; FEES: fiberoptic endoscopic evaluation of swallowing; Oral diets: 4-7; I<sup>2</sup>: Heterogeneity; n: Number of studies; N: Number of patients; NA: Not applicable; p: Statistical significance value; PEG: Percutaneous endoscopic gastrostomy; OR: Odds Ratio

**Figure 8: Pneumonia with videofluoroscopy (VFSS) compared to fiberoptic endoscopic evaluation of swallowing (FEES) in patients with stroke**

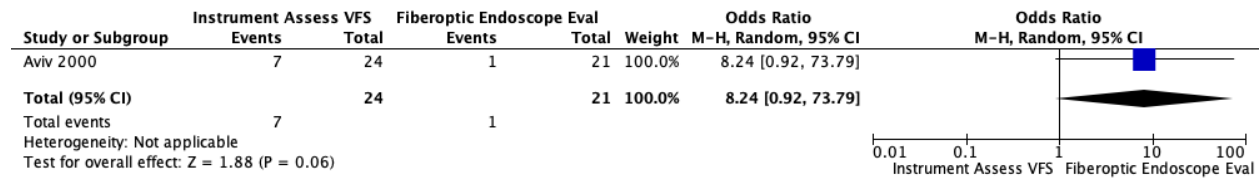

**Figure 9: Percutaneous endoscopic gastrostomy with videofluoroscopy (VFSS) compared to fiberoptic endoscopic evaluation of swallowing (FEES) in patients with stroke**

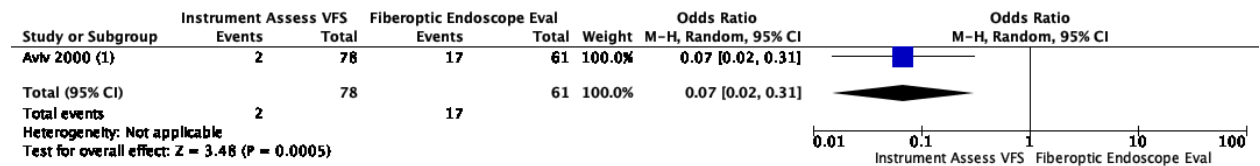

**Footnotes**

(1) Intrument group was all patients



**Table 4: Effect of Complementary and standard assessment in patients with acute or subacute stroke**

| Outcome               | Incidence (%)/ Mean±SD                |                     | n (N)  | OR [95% CI]/ MD [95% CI] | I <sup>2</sup> | P value |
|-----------------------|---------------------------------------|---------------------|--------|--------------------------|----------------|---------|
|                       | Complementary and standard assessment | Standard assessment |        |                          |                |         |
| Mortality             | 13.5%                                 | 19.6%               | 1(311) | 0.64 [0.35, 1.18]        | NA             | 0.15    |
| Pneumonia             | 25.7%                                 | 21.5%               | 1(311) | 1.26 [0.75, 2.14]        | NA             | 0.38    |
| Independence          |                                       |                     |        |                          |                |         |
| • At home             | 48.6%                                 | 44.8%               | 1(311) | 1.17 [0.75, 1.83]        | NA             | 0.50    |
| • At residential care | 43.2%                                 | 45.4%               | 1(311) | 0.92 [0.59, 1.43]        | NA             | 0.70    |
| • At public hospital  | 8.1%                                  | 9.8%                | 1(311) | 0.81 [0.37, 1.78]        | NA             | 0.60    |
| Length of stay        | 7±5.2                                 | 6±5.2               | 1(311) | 1.00 [-0.16, 2.16]       | NA             | 0.09    |
| FOIS                  | 6.2±1.2                               | 6±1.3               | 1(311) | 0.20 [-0.08, 0.48]       | NA             | 0.16    |

CI: Confidence intervals; Diet: Non-oral feeding: 1-3; Oral diets: 4-7; I<sup>2</sup>: Heterogeneity; MD: Mean difference; n: Number of studies; N: Number of patients; NA: Not applicable; p: Statistical significance value; OR: Odds Ratio; SD: Standard deviation

**Figure 10: Mortality with full clinical and instrumental assessment compared to no assessment in patients with acute or subacute stroke**

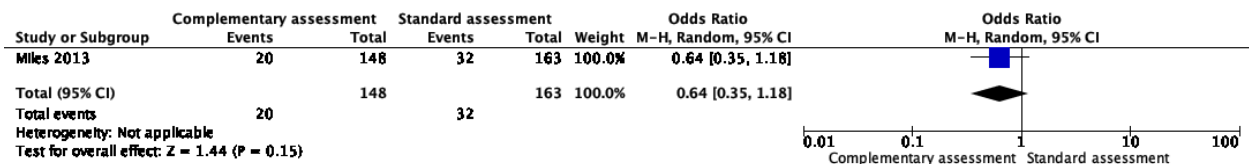

**Figure 11: Pneumonia with full clinical and instrumental assessment compared to no assessment in patients with acute or subacute stroke**

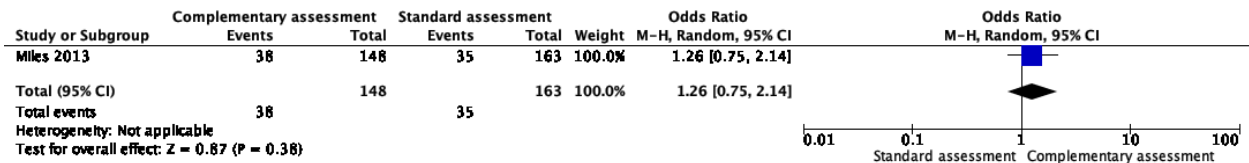

**Figure 12: Independence at home, residential or hospital with full clinical and instrumental assessment compared to no assessment in patients with acute or subacute stroke**

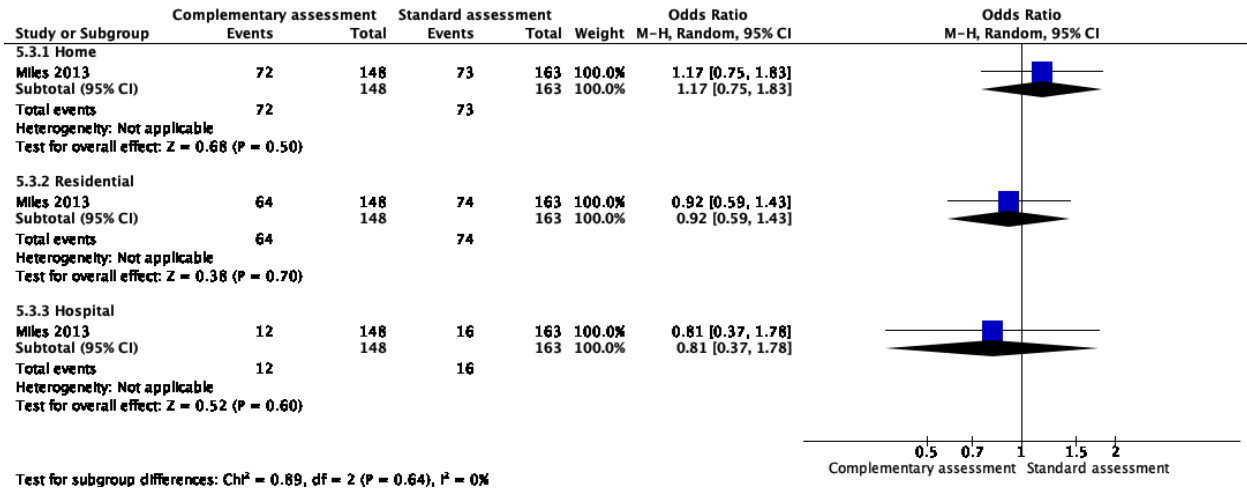

**Figure 13: Length of stay and diet with full clinical and instrumental assessment compared to no assessment in patients with acute or subacute stroke**

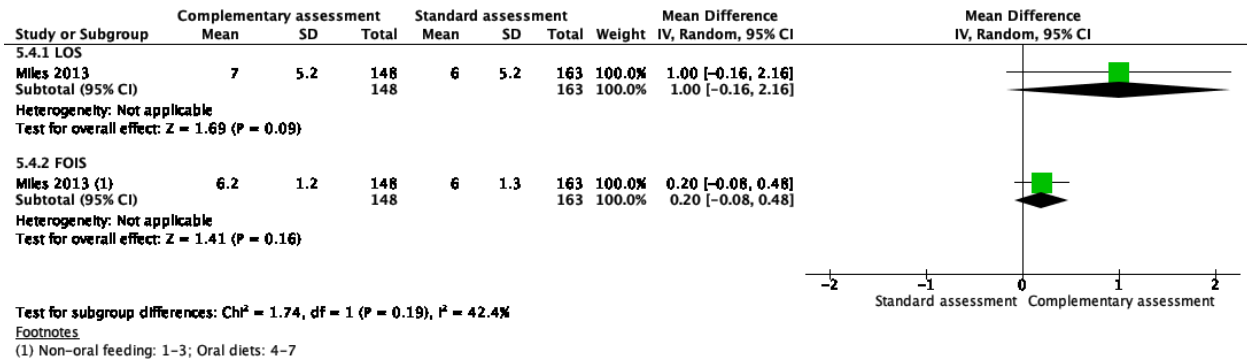

Treatment 1 – Dietary Interventions

Table 1: Effect of consistency modification on pneumonia, dysphagia at end, penetration, UTI and satisfaction in patients with dysphagia after stroke

| Outcome                 | Incidence %              |         | n (N)  | RR [95% CI]/      | I <sup>2</sup> | P value |
|-------------------------|--------------------------|---------|--------|-------------------|----------------|---------|
|                         | Consistency modification | Control |        |                   |                |         |
| <b>Pneumonia</b>        |                          |         |        |                   |                |         |
| • RCT                   | 0.0%                     | 20.0%   | 4(100) | 0.19 [0.03, 1.40] | 0%             | 0.1     |
| <b>Dysphagia at end</b> |                          |         |        |                   |                |         |
| • RCT                   | 33.3%                    | 84.8%   | 64     | 0.40 [0.20, 0.77] | 0%             | 0.006   |
| <b>Penetration</b>      |                          |         |        |                   |                |         |
| • RCT                   | 0.0%                     | 13.1%   | 1(122) | 0.06 [0.00, 1.00] | NA             | 0.05    |
| <b>UTI*</b>             |                          |         |        |                   |                |         |
| • RCT                   | NR                       | NR      | NR     | NR                | NR             | .024    |
| <b>Aspiration</b>       |                          |         |        |                   |                |         |
| • RCT                   | 21.3%                    | 45.7%   | 188    | 0.51 [0.14, 1.77] | 90%            | 0.29    |
| <b>Satisfaction**</b>   |                          |         |        |                   |                |         |
| • RCT                   | NR                       | NR      | NR     | NR                | NR             | 0.414   |

\*: Higher proportion in thickened compared to water protocol; \*\*: Water protocol vs thickened; CI: Confidence intervals; I<sup>2</sup>, p: Heterogeneity; n: Number of studies; N: Number of patients; p: Statistical significance value

Figure 1: Pneumonia (Data from RCTs)

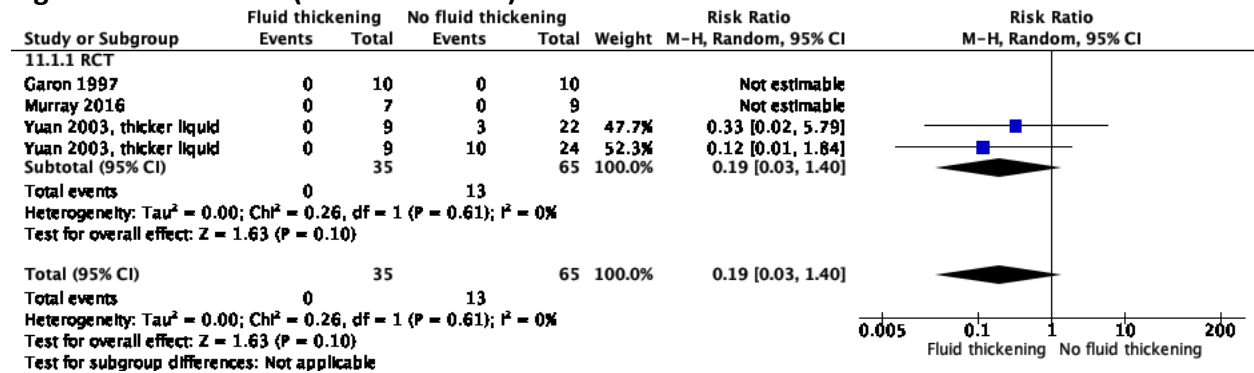

Figure 2: Dysphagia and penetration with thick fluid in patients with stroke and dysphagia (Data from RCTs)

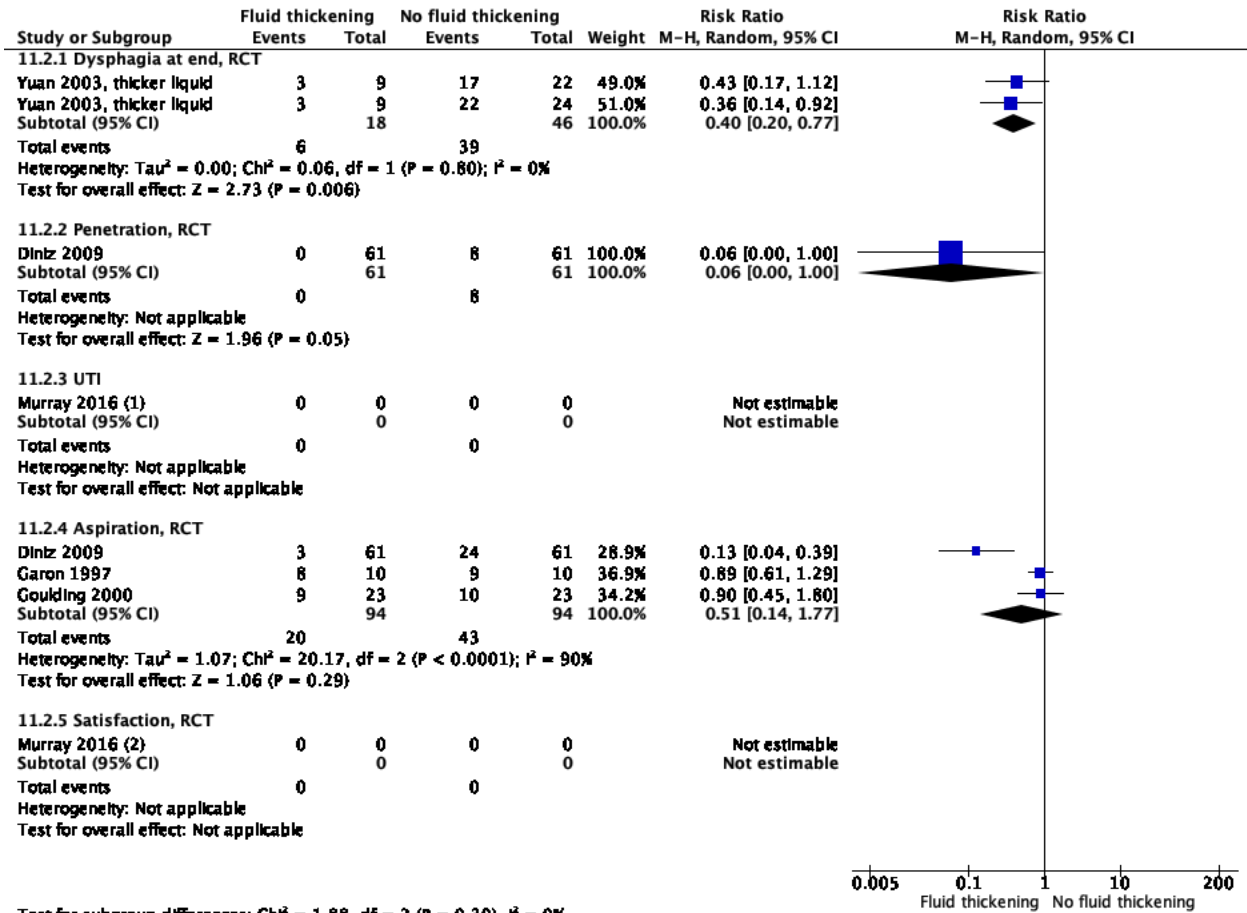

**Table 2: Length of stay in hospital, time to resolution of dysphagia and length of days of no aspiration with thick fluid in patients with stroke and dysphagia**

| Outcome                                | Mean±SD          |         | n (N) | MD [95% CI]           | I <sup>2</sup> | P value |
|----------------------------------------|------------------|---------|-------|-----------------------|----------------|---------|
|                                        | Fluid thickening | Control |       |                       |                |         |
| <b>LOS in hospital, days</b>           |                  |         |       |                       |                |         |
| • RCT                                  | 24±9             | 34±12   | 1(64) | -9.58 [-15.41, -3.76] | 19%            | 0.001   |
| <b>Time to resolution of dysphagia</b> |                  |         |       |                       |                |         |
|                                        | 38±29            | 27±13   | 1(14) | 11.00 [-13.89, 35.89] | NA             | 0.39    |
| <b>Days of no aspiration</b>           |                  |         |       |                       |                |         |
| • RCT                                  | 39±19            | 33±11   | 1(20) | 6.10 [-7.17, 19.37]   | NA             | 0.37    |

CI: Confidence intervals; I<sup>2</sup>, p: Heterogeneity; LOS: Length of stay; MD: Mean difference; n: Number of studies; N: Number of patients; p: Statistical significance value; SD: Standard Deviation

**Figure 3: Length of stay in hospital, time to resolution of dysphagia and length of days of no aspiration with thick fluid in patients with stroke and dysphagia**

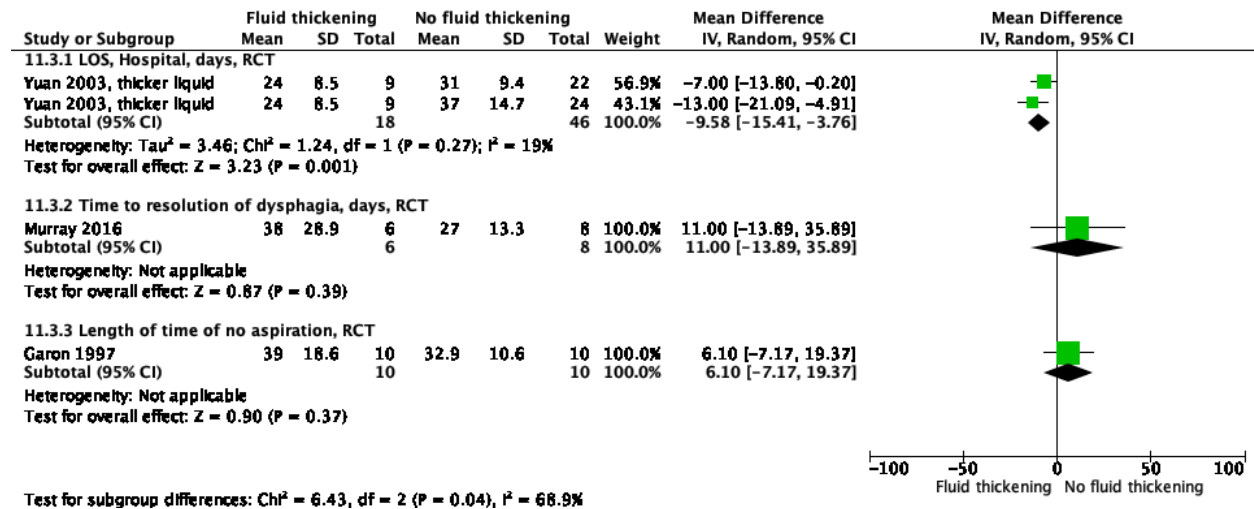

**Table 3: Effect of fluid thickening on albumin in patients with dysphagia after stroke**

| Outcome                       | Mean±SD          |           | n (N) | MD [95% CI]                 | I <sup>2</sup> | P value  |
|-------------------------------|------------------|-----------|-------|-----------------------------|----------------|----------|
|                               | Fluid thickening | Control   |       |                             |                |          |
| <b>Albumin</b>                |                  |           |       |                             |                |          |
| • RCT                         | 37.0±6.7         | 36.7±10.0 | 1(64) | 0.30 [-3.94, 4.55]          | 0%             | 0.89     |
| <b>BUN/Cr ratio</b>           |                  |           |       |                             |                |          |
| RCT                           | 25±13            | 20±4      | 1(14) | 5.00 [-5.76, 15.76]         | NA             | 0.36     |
| <b>Fluid intake</b>           |                  |           |       |                             |                |          |
| <b>Oral thickened fluid</b>   |                  |           |       |                             |                |          |
| • Overall                     | 1004±486         | 785±162   | 2(27) | 225.22 [-52.84, 503.28]     | 0%             | 0.11     |
| • RCT                         | 1028±486         | 807±162   | 1(14) | 221.00 [-183.75, 625.75]    | NA             | 0.28     |
| • NRCT                        | 984±486          | 755±162   | 1(13) | 229.00 [-153.65, 611.65]    | NA             | 0.24     |
| • <b>Enteral + oral fluid</b> |                  |           |       |                             |                |          |
| • NRCT                        | 4142±486         | 755±162   | 1(13) | 3387.00 [3004.35, 3769.65]  | NA             | <0.00001 |
| <b>Water/ thin liquid</b>     |                  |           |       |                             |                |          |
| • Overall                     | 698±255          | 1100±602  | 2(53) | -324.95 [-578.81, -71.08]   | 44%            | 0.01     |
| • RCT                         | 71±70            | 299±274   | 1(14) | -228.00 [-425.96, -30.04]   | NA             | 0.02     |
| • NRCT                        | 907±317          | 1405±727  | 1(39) | -498.00 [-841.70, -154.30]  | NA             | 0.005    |
| <b>Fluid intake</b>           |                  |           |       |                             |                |          |
| • Overall                     | 1179±235         | 1612±455  | 3(77) | -133.22 [-541.90, 275.46]   | 94%            | 0.52     |
| • RCT                         | 745±164          | 649±172   | 2(38) | 140.48 [-41.56, 322.51]     | 68%            | 0.13     |
| • NRCT                        | 1589±302         | 2575±737  | 1(39) | -986.00 [-1330.71, -641.29] | NA             | <0.0001  |

CI: Confidence intervals; I<sup>2</sup>, p: Heterogeneity; LOS: Length of stay; MD: Mean difference; n: Number of studies; N: Number of patients; p: Statistical significance value; SD: Standard Deviation

Figure 4: Effect of thickened fluid on albumin and BUN/Cr ratio in patients with stroke and dysphagia

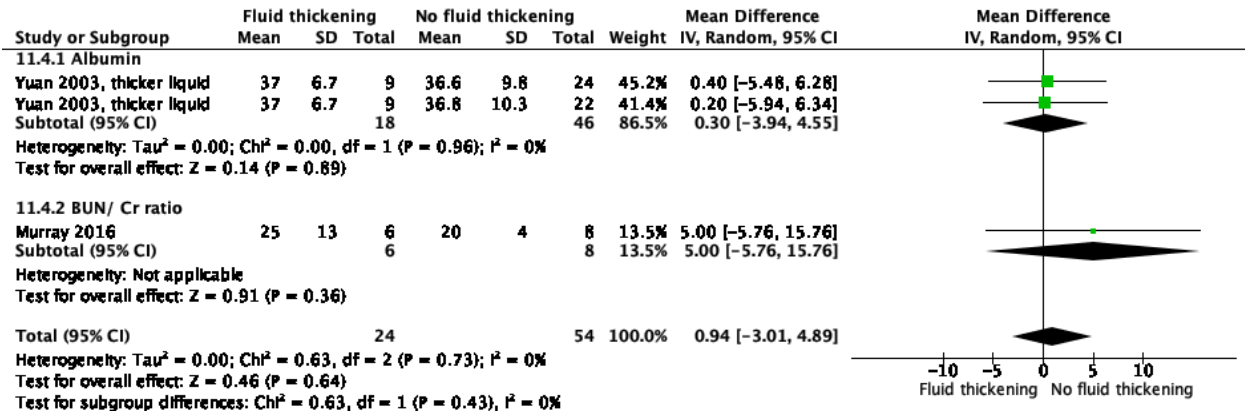

Figure 5: Effect of thickened fluid on fluid intake in patients with stroke and dysphagia

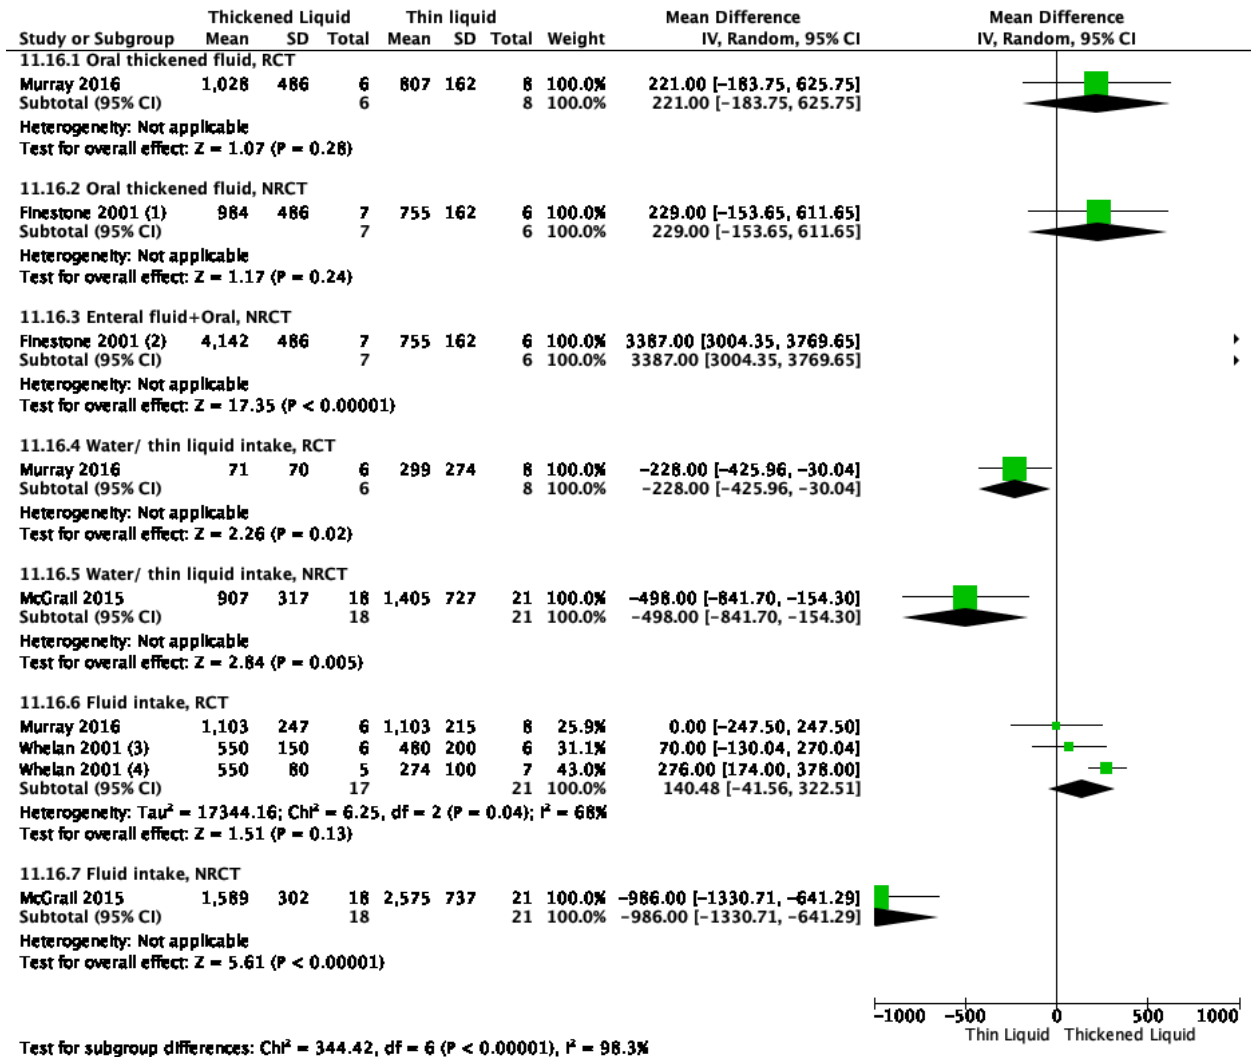

Footnotes

- (1) Intervention group also received 3158 mL of enteral fluid
- (2) Intervention group also received 3158 mL of enteral fluid
- (3) Stroke unit, Prethickened vs powdered thickened
- (4) Non-specialist ward, Prethickened vs powdered thickened



**Table 4: Effect of Dysphagia/texture modified diet on energy and protein intake in patients with post-stroke dysphagia**

| Outcome                          | Mean ± SD                           |                                      | n (N) | MD [95% CI]          | I <sup>2</sup> | P value |
|----------------------------------|-------------------------------------|--------------------------------------|-------|----------------------|----------------|---------|
|                                  | Dysphagia diet/Texture modification | Regular diet/No Texture modification |       |                      |                |         |
| <b>Energy intake, Kcl/kg/day</b> |                                     |                                      |       |                      |                |         |
| • NRCT                           | 19.4±6.2                            | 22.3±9.0                             | 1(52) | -2.90 [-7.09, 1.29]  | NA             | 0.18    |
| <b>Protein intake, g/kg/day</b>  |                                     |                                      |       |                      |                |         |
| • NRCT                           | 0.71±0.29                           | 0.90±0.31                            | 1(68) | -0.19 [-0.34, -0.04] | NA             | 0.02    |

CI: Confidence intervals; I<sup>2</sup>, p: Heterogeneity; MD: Mean differences; n: Number of studies; N: Number of patients; NA: Not applicable; p: Statistical significance value; RR: Risk Ratio; SD: Standard deviation

**Figure 6: Energy intake (Kcl/kg/day) with texture modified diet in patients with post-stroke dysphagia**

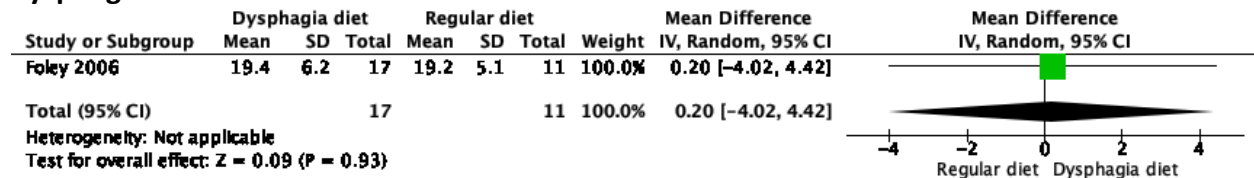

**Figure 7: Protein intake (g/kg/day), with texture modified diet in patients with post-stroke dysphagia**

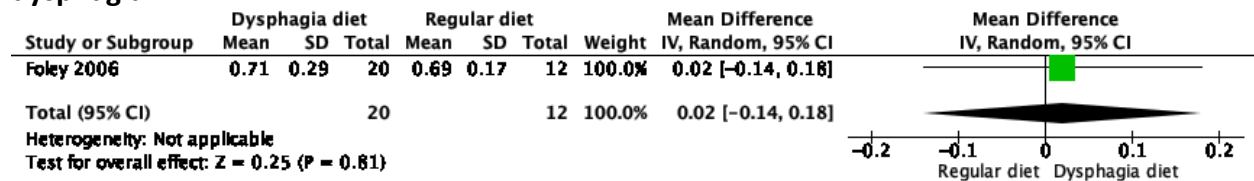

## Treatment 2a – Behavioural Interventions

Table 1: Effect of behavioural therapy on dysphagia scores in patients with dysphagia after stroke

| Outcome                                    | Mean±SD  |          | n (N)   | MD [95% CI]          | I <sup>2</sup> | P value  |
|--------------------------------------------|----------|----------|---------|----------------------|----------------|----------|
|                                            | Behavior | Control  |         |                      |                |          |
| <b>Improvement in dysphagia scores</b>     |          |          |         |                      |                |          |
| • Overall                                  | 6.4±3.6  | 4.1±3.5  | 18(510) | 1.18 [0.78, 1.57]    | 70%            | <0.00001 |
| • RCT                                      | 5.0±2.9  | 3.0±2.8  | 16(440) | 0.97 [0.64, 1.30]    | 68%            | <0.00001 |
| • EMST, RCT                                | 1.4±1.3  | 0.7±1.4  | 4(108)  | 0.99 [0.51, 1.47]    | 16%            | < 0.0001 |
| • Swallowing exercises, overall            | 7.6±4.2  | 5.1±4.1  | 14(402) | 1.01 [0.67, 1.34]    | 73%            | <0.00001 |
| • Swallowing exercises, RCT                | 6.1±3.4  | 3.9±3.3  | 12(332) | 1.19 [0.68, 1.69]    | 73%            | <0.00001 |
| • Swallowing exercises, NRCT               | 15.5±8.4 | 10.5±7.3 | 2(70)   | 3.11 [-0.12, 6.34]   | 40%            | 0.06     |
|                                            |          |          |         |                      |                |          |
| <b>Post intervention, dysphagia scores</b> |          |          |         |                      |                |          |
| • Overall                                  | 11.3±4.1 | 14.2±4.2 | 19(555) | -1.44 [-2.28, -0.60] | 90%            | 0.0008   |
| • RCT                                      | 8.8±3.5  | 11.1±3.7 | 17(485) | -0.82 [-1.05, -0.59] | 0%             | <0.00001 |
| • EMST, RCT                                | 3.8±1.3  | 4.6±1.4  | 4(109)  | -0.81 [-1.22, -0.39] | 14%            | 0.0001   |
| • Swallowing exercises, overall            | 13.0±4.7 | 16.7±4.9 | 15(485) | -1.66 [-2.87, -0.45] | 92%            | 0.007    |
| • Swallowing exercises, RCT                | 10.2±4.1 | 13.2±4.4 | 13(376) | -0.84 [-1.14, -0.54] | 0%             | <0.00001 |
| • Swallowing exercises, NRCT               | 29.4±8.2 | 34.1±7.2 | 2(70)   | -6.71 [-8.51, -4.91] | 14%            | <0.00001 |

CI: Confidence intervals; I<sup>2</sup>, p: Heterogeneity; n: Number of studies; N: Number of patients; NA: Not applicable; NRCT: Non-randomized controlled trial; p: Statistical significance value; SD: Standard Deviation; MD: Mean Difference; RCT: Randomized controlled trial

Figure 1: Improvement in dysphagia scores with behavior therapy in patients with dysphagia after stroke

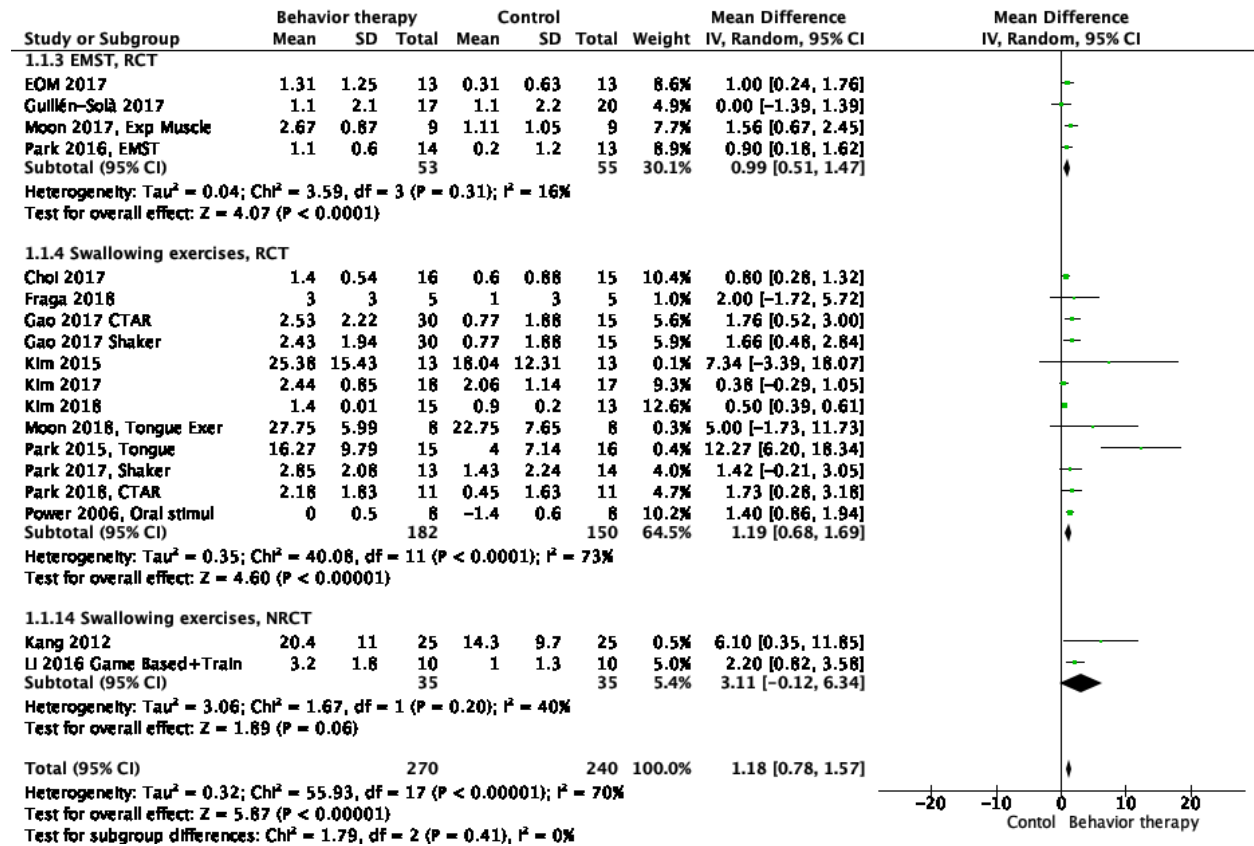

Figure 2: Improvement in dysphagia scores with different kinds of behavior therapy in patients with dysphagia after stroke

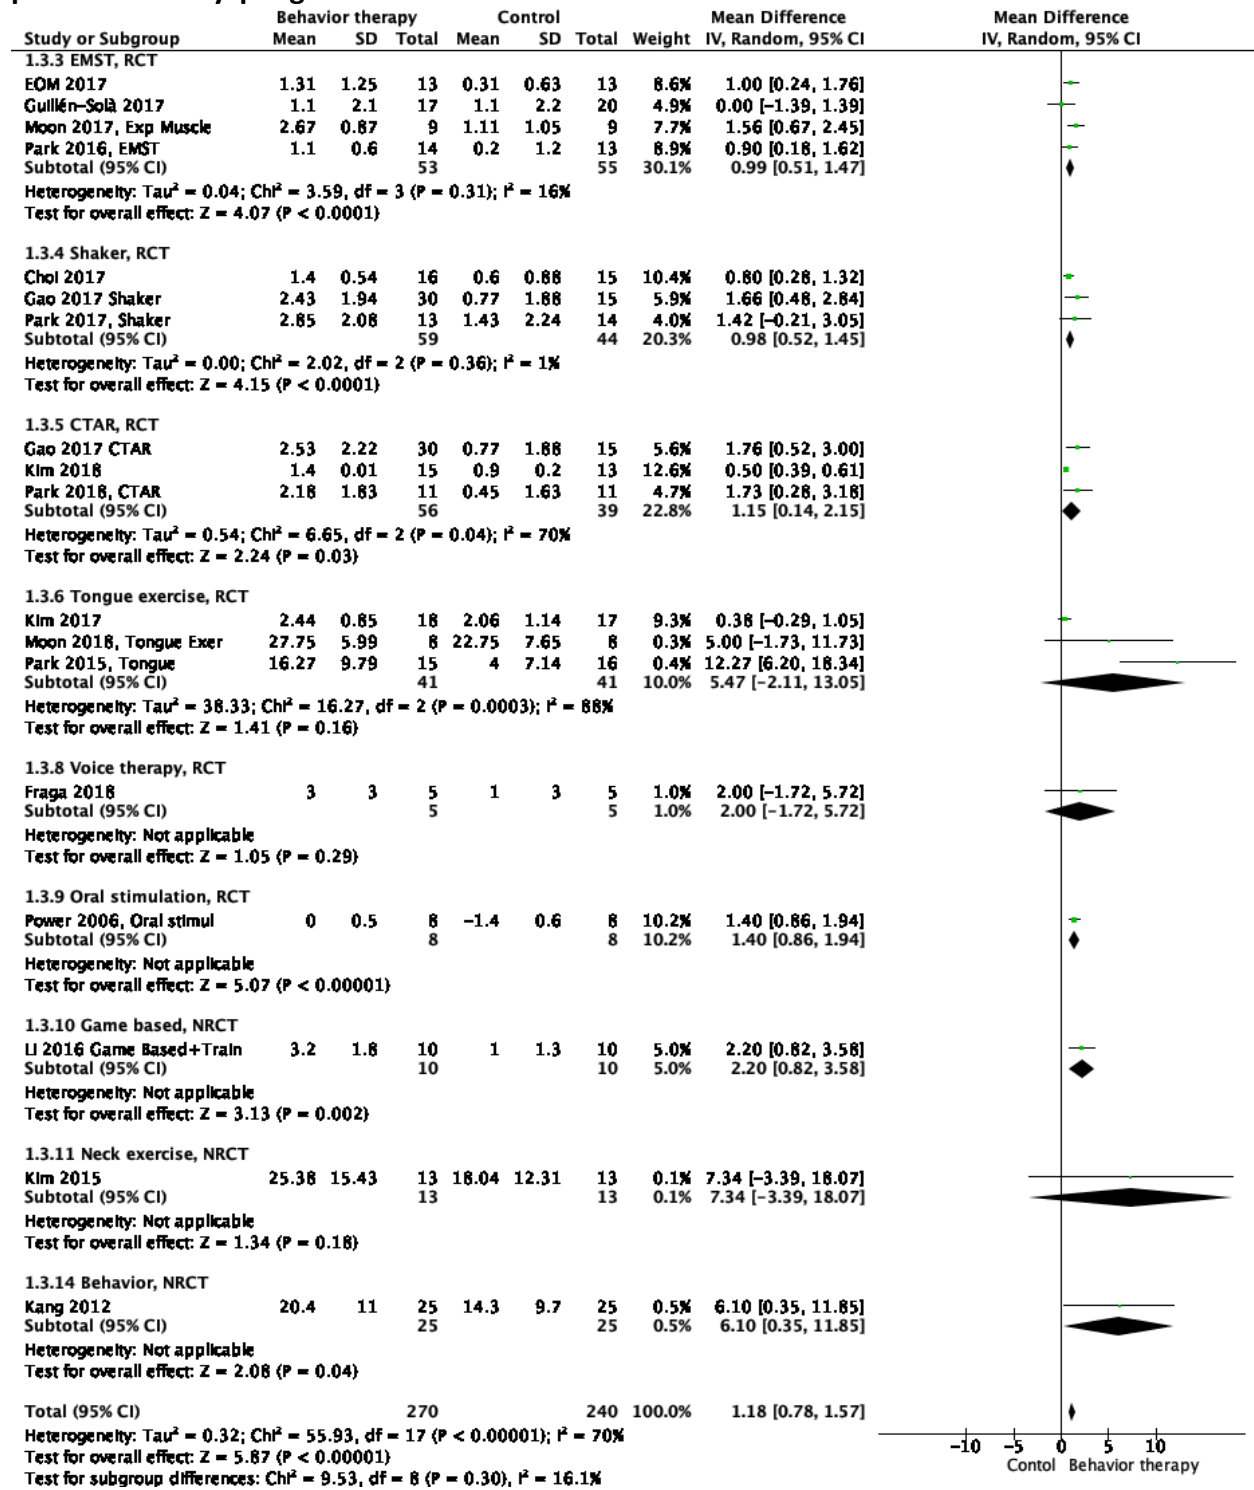

Figure 3: Dysphagia scores after different behavior therapies in patients with dysphagia after stroke

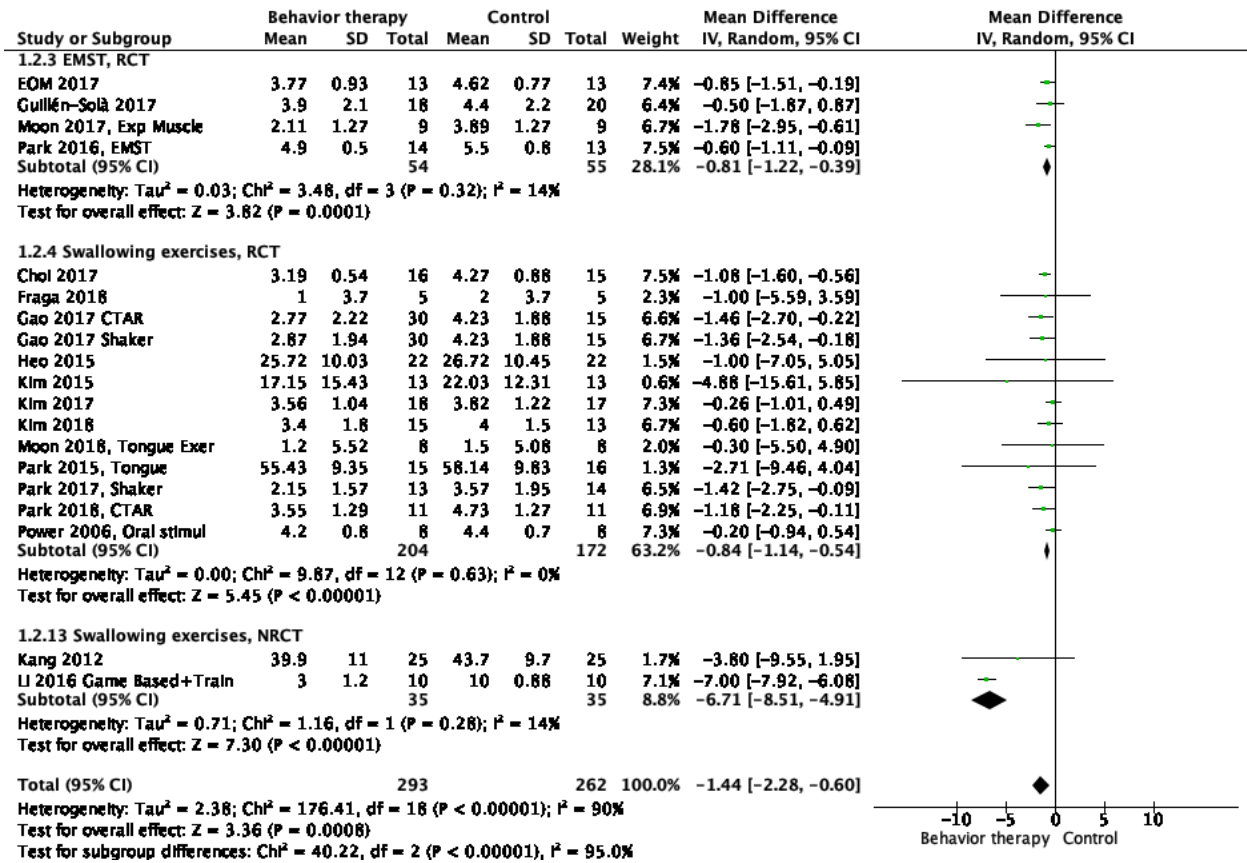

Figure 4: Dysphagia scores after different kinds of behavior therapies in patients with dysphagia after stroke

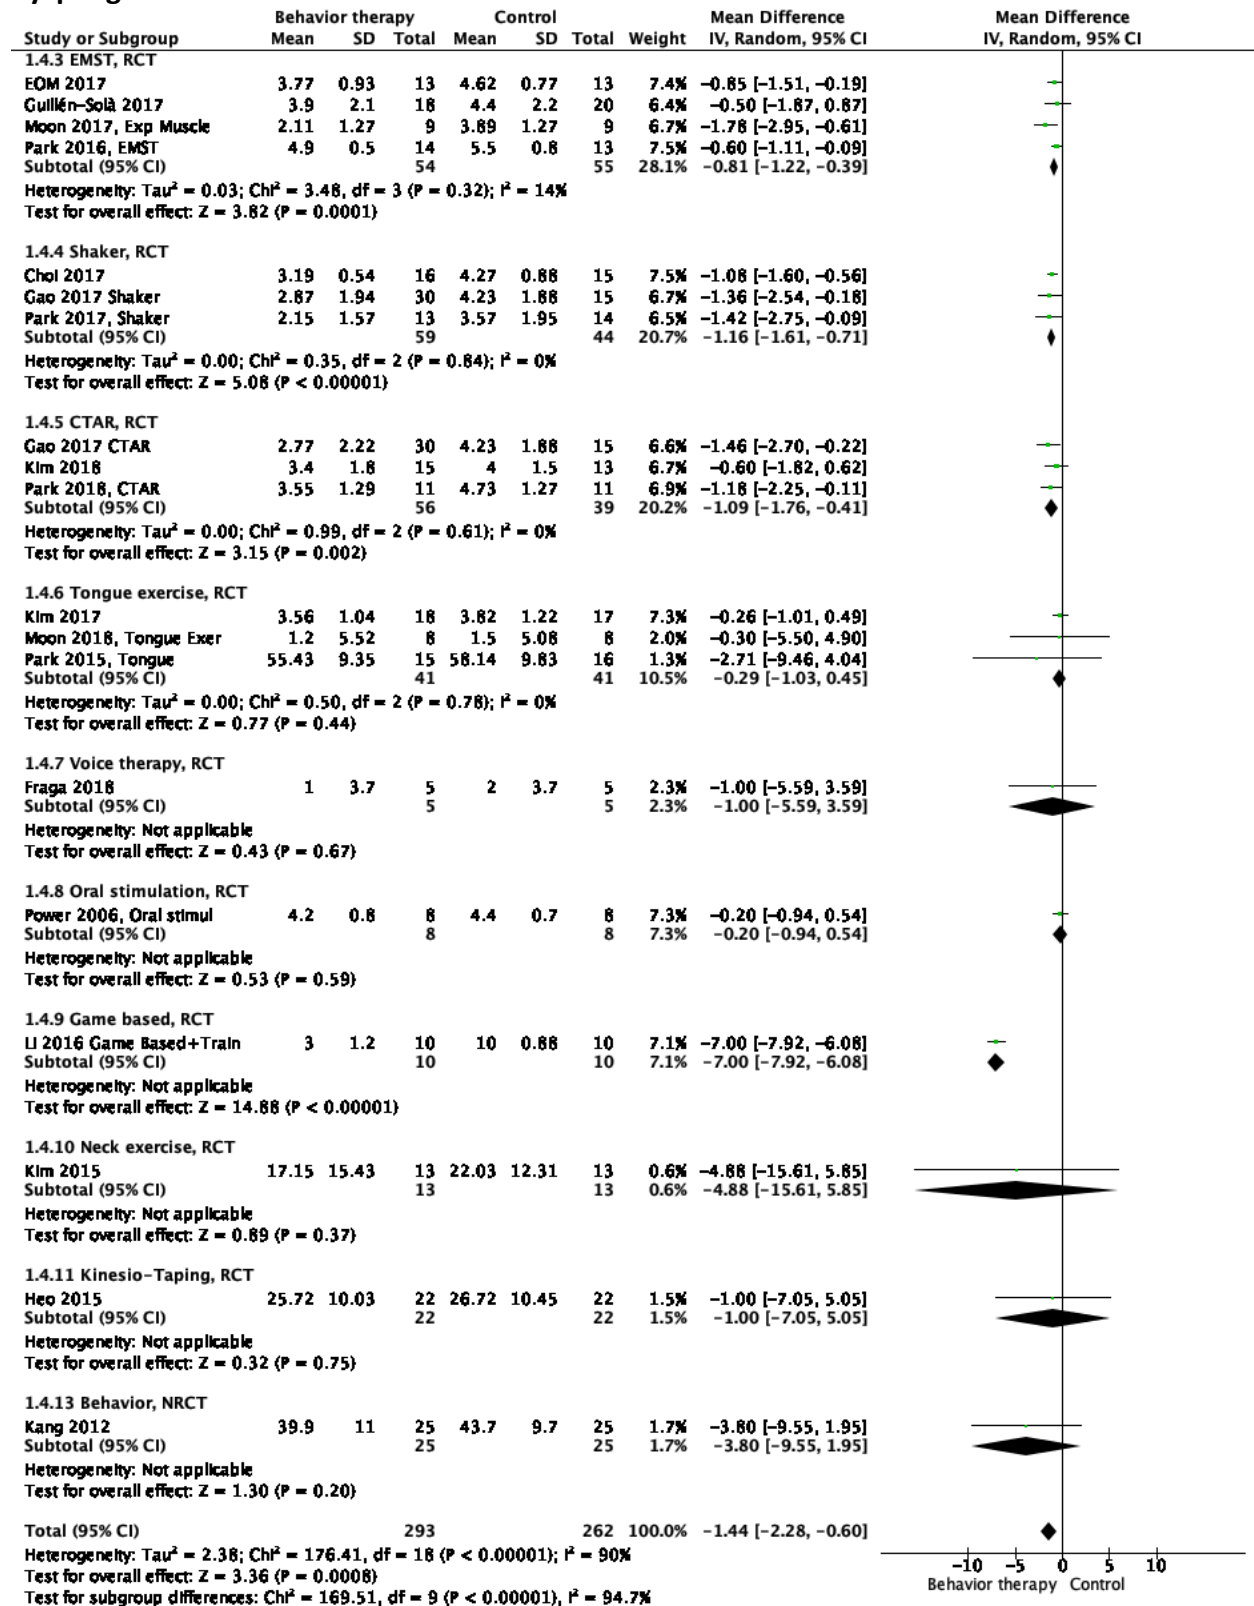

**Table 2: Effect of behavior therapy on different types of dysphagia scores in patients with dysphagia after stroke**

| Outcome                       | Mean±SD    |           | n (N)   | MD [95% CI]           | I <sup>2</sup> | P value  |
|-------------------------------|------------|-----------|---------|-----------------------|----------------|----------|
|                               | Behavior   | Control   |         |                       |                |          |
| <b>PAS-Change</b>             |            |           |         |                       |                |          |
| • RCT                         | -1.9±1.4   | -0.8±1.4  | 12(358) | -0.98 [-1.30, -0.65]  | 62%            | <0.00001 |
| <b>PAS-Post intervention</b>  |            |           |         |                       |                |          |
| • RCT                         | 3.3±1.5    | 4.3±1.4   | 12(358) | -0.82 [-1.08, -0.57]  | 12%            | <0.00001 |
| <b>VDS-Change</b>             |            |           |         |                       |                |          |
| • Overall                     | -10.9±5.7  | -7.1±4.9  | 8(260)  | -4.24 [-6.09, -2.38]  | 76%            | <0.00001 |
| • RCT                         | -8.9±4.6   | -5.0±3.5  | 7(210)  | -4.08 [-6.01, -2.16]  | 79%            | <0.0001  |
| • NRCT                        | -20.4±11.0 | -14.3±9.7 | 1(50)   | -6.10 [-11.85, -0.35] | NA             | 0.004    |
| <b>VDS-Post intervention</b>  |            |           |         |                       |                |          |
| • Overall                     | 31.8±9.4   | 43.2±8.0  | 8(241)  | -5.31 [-8.20, -2.42]  | 82%            | 0.0003   |
| • RCT                         | 29.9±9.0   | 43.1±7.5  | 7(191)  | -5.60 [-8.75, -2.45]  | 85%            | 0.005    |
| • NRCT                        | 39.9±11.0  | 43.7±9.7  | 1(50)   | -3.80 [-9.55, 1.95]   | NA             | 0.20     |
| <b>FDS-Change</b>             |            |           |         |                       |                |          |
| • RCT                         | -13.3±6.6  | -5.8±5.8  | 2(40)   | -6.37 [-12.05, -0.70] | 56%            | 0.03     |
| <b>FDS-Post intervention</b>  |            |           |         |                       |                |          |
| • RCT                         | 23.3±9.5   | 25.8±10.5 | 3(84)   | -2.72 [-6.49, 1.05]   | 0%             | 0.16     |
| <b>FOIS-Change</b>            |            |           |         |                       |                |          |
| • Overall                     | 2.4±1.5    | 0.8±1.3   | 5(138)  | 1.58 [1.15, 2.00]     | 0%             | <0.00001 |
| • RCT                         | 1.9±1.7    | 0.6±1.4   | 3(68)   | 1.19 [0.55, 1.84]     | 0%             | 0.0003   |
| • NRCT                        | 2.9±1.2    | 1.0±1.2   | 2(70)   | 1.87 [1.31, 2.43]     | 0%             | <0.00001 |
| <b>FOIS-Post intervention</b> |            |           |         |                       |                |          |
| • Overall                     | 5.0±1.4    | 3.8±1.4   | 5(138)  | 1.20 [0.70, 1.70]     | 20%            | <0.0001  |
| • RCT                         | 5.3±1.7    | 4.3±1.4   | 3(68)   | 1.01 [0.39, 1.63]     | 0%             | 0.001    |
| • NRCT                        | 4.7±1.1    | 3.3±1.4   | 2(70)   | 1.69 [0.13, 3.24]     | 78%            | 0.03     |
| <b>MASA-Change</b>            |            |           |         |                       |                |          |
| • RCT                         | 27.8±6.0   | 22.8±7.7  | 1(16)   | 5.00 [-1.73, 11.73]   | NA             | 0.15     |
| <b>MASA-Post intervention</b> |            |           |         |                       |                |          |
| • RCT                         | 173.3±5.5  | 166.9±5.1 | 1(16)   | 6.37 [1.17, 11.57]    | NA             | 0.02     |
| <b>ASHA-Change</b>            |            |           |         |                       |                |          |
| • RCT                         | 2.3±4.5    | 2.8±1.4   | 1(26)   | -0.53 [-3.09, 2.03]   | NA             | 0.69     |
| <b>ASHA-Post intervention</b> |            |           |         |                       |                |          |
| • RCT                         | 4.5±4.5    | 4.8±1.4   | 1(26)   | -0.38 [-2.94, 2.18]   | NA             | 0.77     |

CI: Confidence intervals; I<sup>2</sup>, p: Heterogeneity; n: Number of studies; N: Number of patients; NA: Not applicable; NRCT: Non-randomized controlled trial; p: Statistical significance value; SD: Standard Deviation; MD: Mean Difference; RCT: Randomized controlled trial

Figure 5: Effect of behavior therapy on PAS scores in patients with dysphagia after stroke

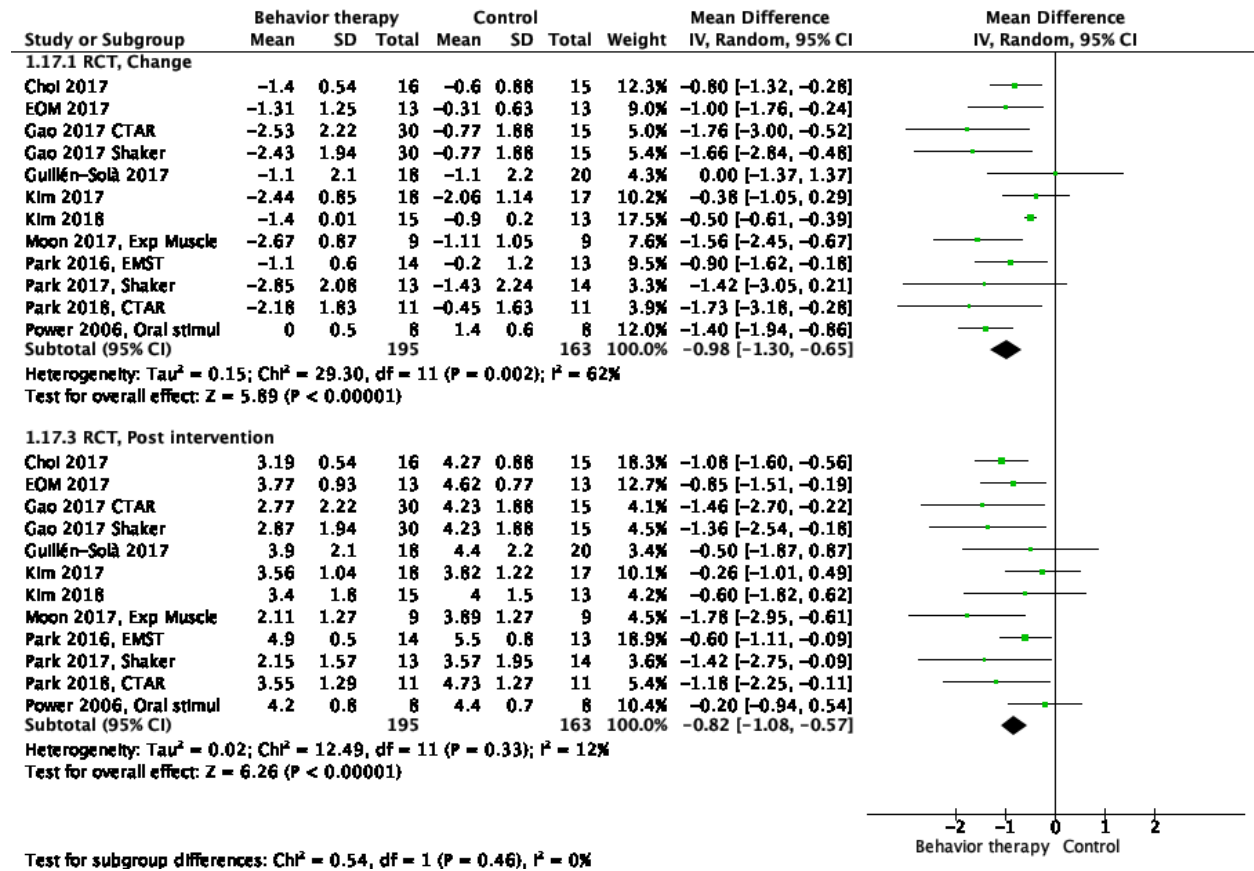



Figure 6: Effect of behavior therapy on VDS scores in patients with dysphagia after stroke

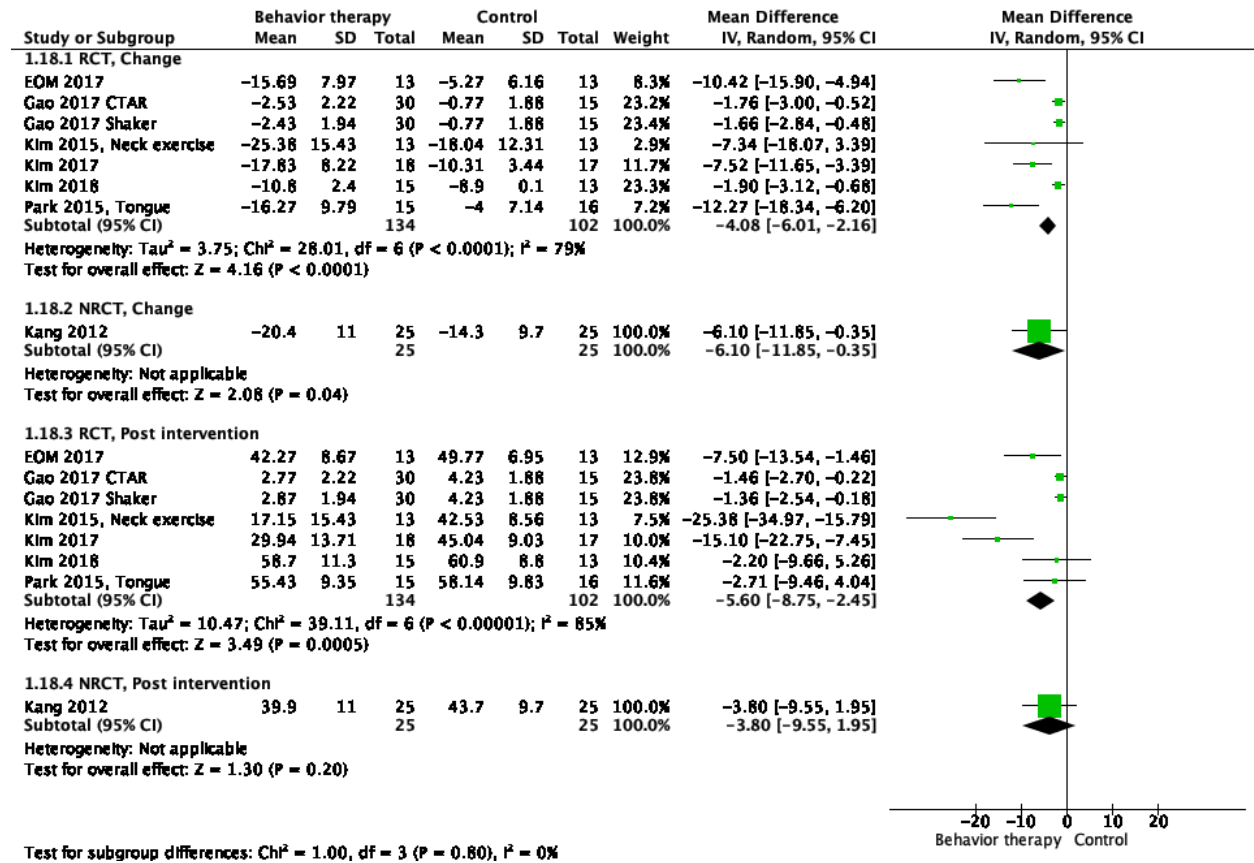

Figure 7: Effect of behavior therapy on FDS scores in patients with dysphagia after stroke

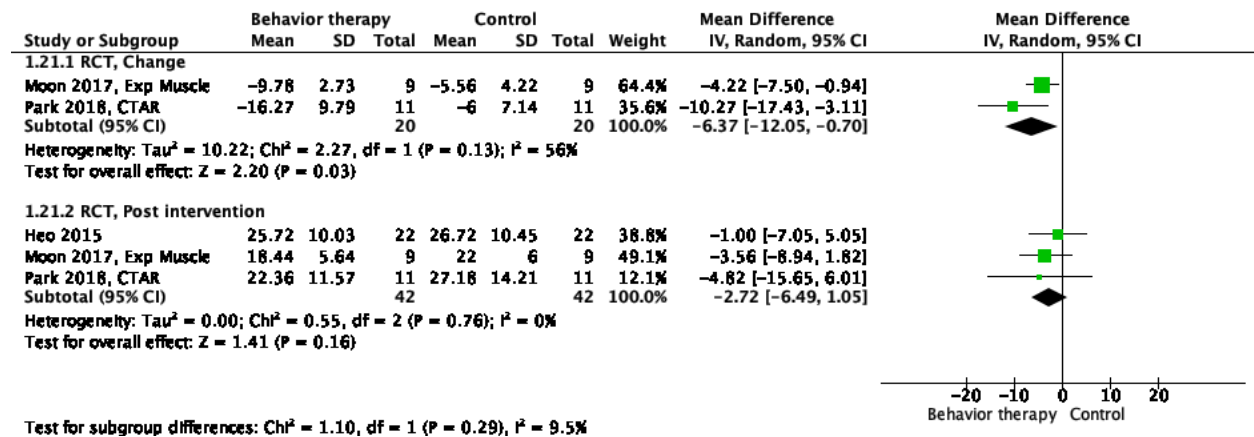

Figure 8: Effect of behavior therapy on FOIS scores in patients with dysphagia after stroke

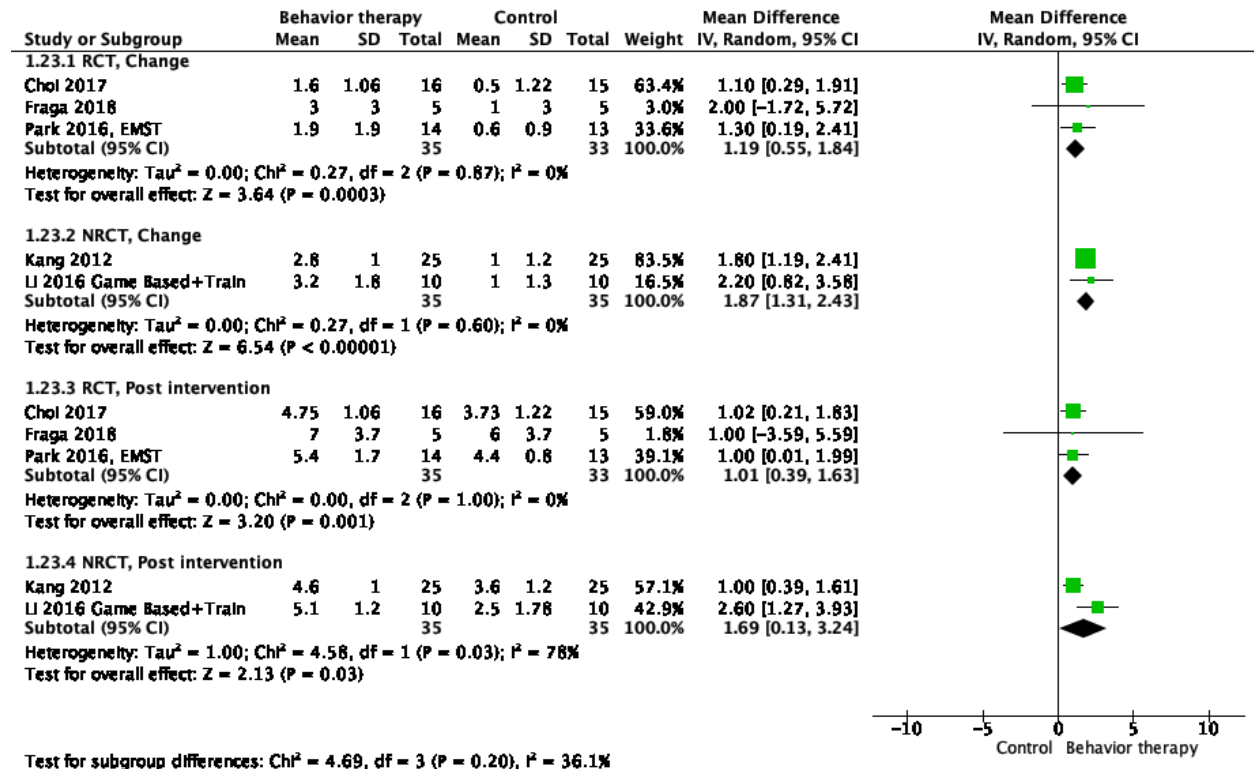

Figure 9: Effect of behavior therapy on MASA scores in patients with dysphagia after stroke

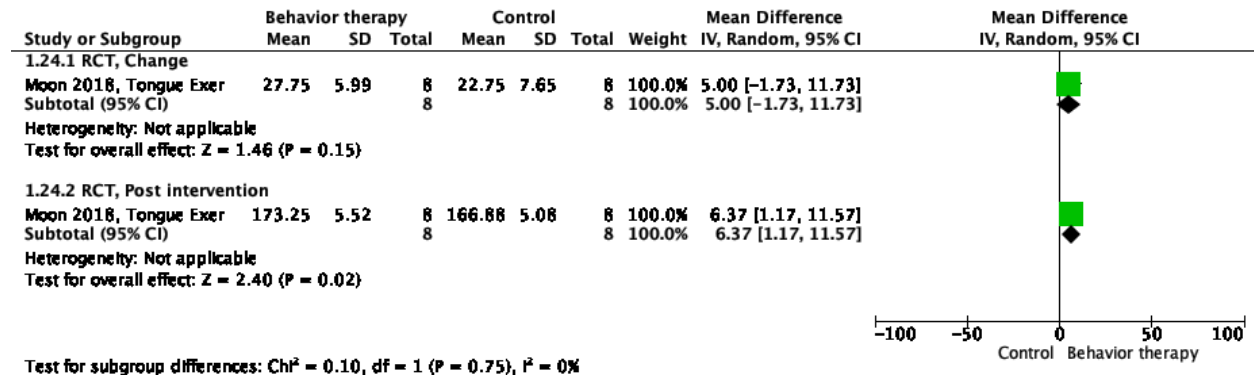

Figure 10: Effect of behavior therapy on ASHA scores in patients with dysphagia after stroke

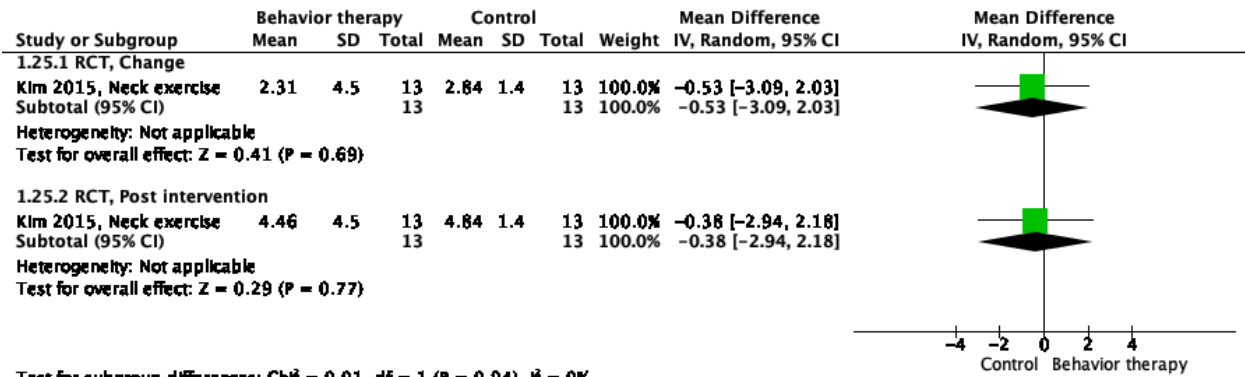

**Table 3: Effect of behaviour therapy on different outcomes in patients with dysphagia after stroke**

| Outcome                     | Mean±SD/ Incidence (%) |           | n (N)  | MD/ RR [95% CI]     | I <sup>2</sup> | P value  |
|-----------------------------|------------------------|-----------|--------|---------------------|----------------|----------|
|                             | Behavior               | Control   |        |                     |                |          |
| <b>Mortality</b>            |                        |           |        |                     |                |          |
| • RCT                       | 15.1%                  | 10.7%     | 3(505) | 1.47 [0.32, 6.78]   | 71%            | 0.62     |
| <b>mRS, RCT</b>             |                        |           |        |                     |                |          |
| • mRS ≥3                    | 50.5%                  | 48.0%     | 1(306) | 1.05 [0.82, 1.34]   | NA             | 0.69     |
| <b>Pneumonia</b>            |                        |           |        |                     |                |          |
| • Overall                   | 18.4%                  | 24.5%     | 6(677) | 0.57 [0.43, 0.75]   | 0%             | < 0.0001 |
| • EMST, RCT                 | 11.6%                  | 19.0%     | 3(196) | 0.58 [0.24, 1.41]   | 22%            | 0.23     |
| • Swallowing exercises, RCT | 21.3%                  | 26.6%     | 3(481) | 0.56 [0.41, 0.76]   | 0%             | 0.0002   |
| <b>LOS</b>                  |                        |           |        |                     |                |          |
| • Swallowing exercise, RCT  | 19.2±1.2               | 21.4±12.4 | 1(306) | -2.20 [-4.61, 0.21] | NA             | 0.07     |
| <b>Tubing</b>               |                        |           |        |                     |                |          |
| • Tube removal              | 63.6%                  | 28.6%     | 2(43)  | 2.16 [0.75, 6.17]   | 43%            | 0.15     |

CI: Confidence intervals; I<sup>2</sup>, p: Heterogeneity; LOS: Length of Stay; MD: Mean difference; n: Number of studies; N: Number of patients; NA: Not applicable; NRCT: Non-randomized controlled trial; p: Statistical significance value; RCT: Randomized controlled trial; RR: Risk Ratio; SD: Standard deviation

**Figure 11: Effect of behavior therapy on Mortality scores in patients with dysphagia after stroke**

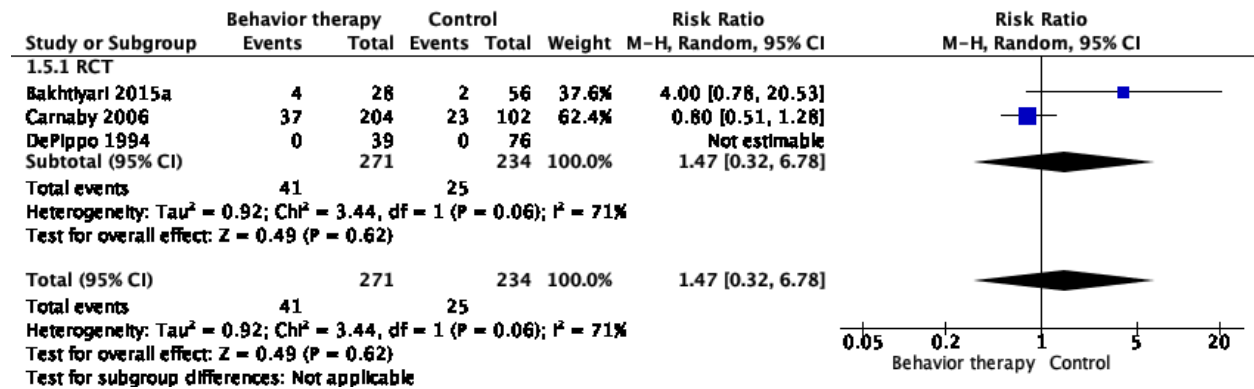

Figure 12: Effect of behavior therapy on mRS scores in patients with dysphagia after stroke

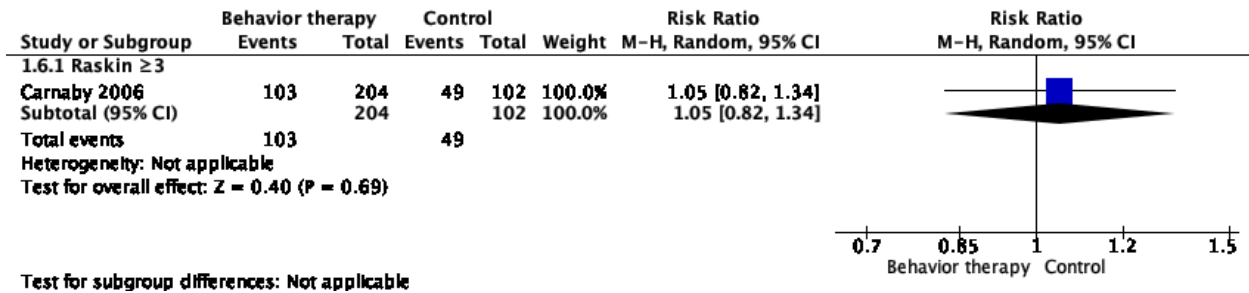

Figure 13: Effect of behavior therapy on Pneumonia scores in patients with dysphagia after stroke

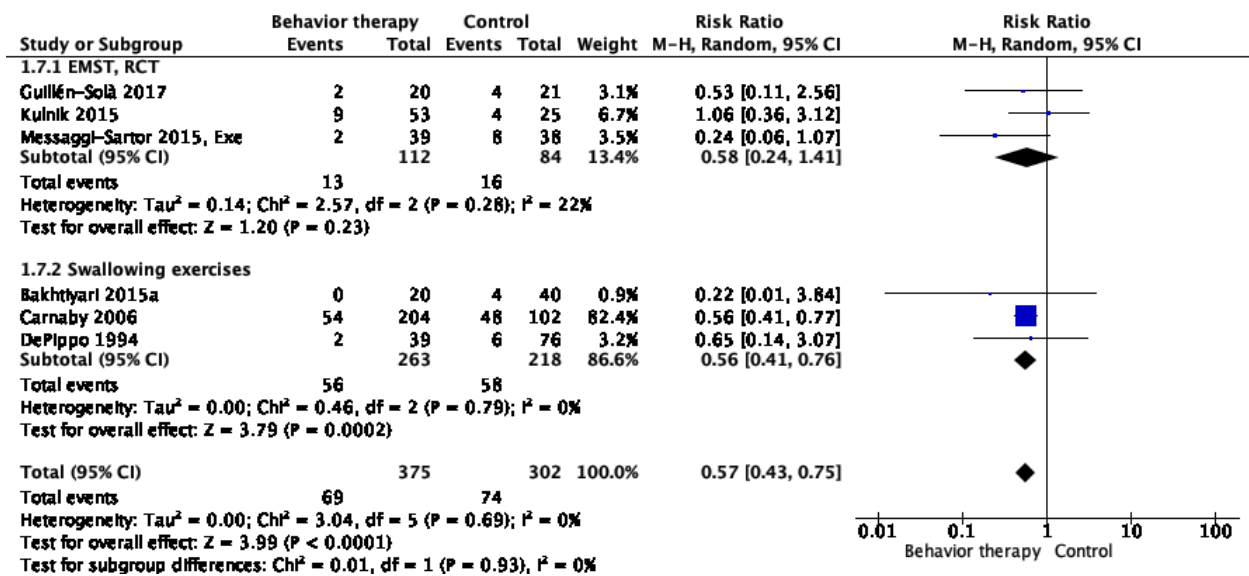

Figure 14: Effect of behavior therapy on Length of study, days scores in patients with dysphagia after stroke

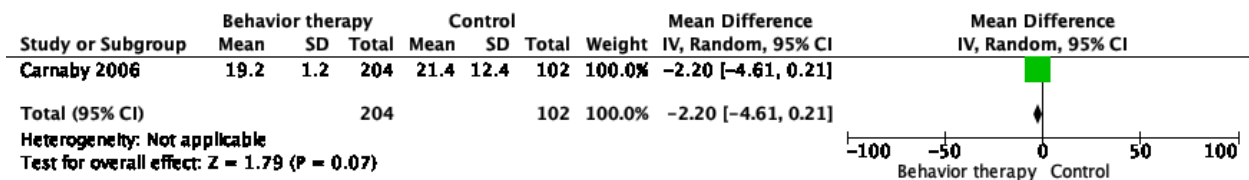

Figure 15: Effect of behavior therapy on tube removal scores in patients with dysphagia after stroke

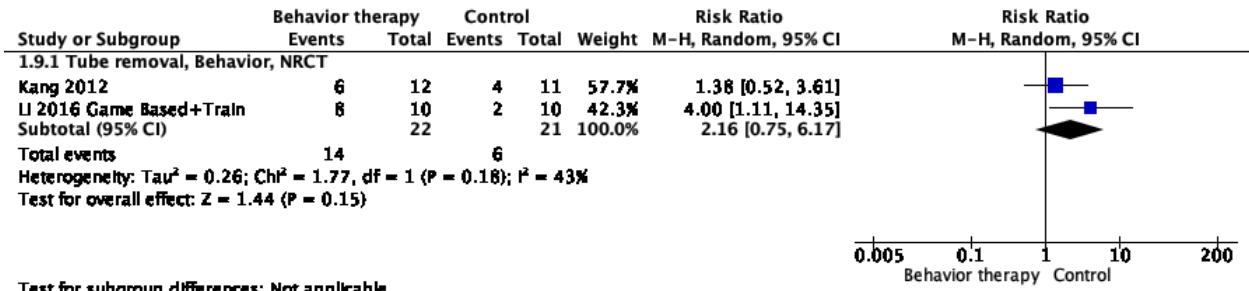

**Table 4: Effect of behaviour therapy on different outcomes in patients with dysphagia after stroke**

| Outcome                                                  | Mean±SD    |            | n (N)  | MD [95% CI]          | I <sup>2</sup> | P value  |
|----------------------------------------------------------|------------|------------|--------|----------------------|----------------|----------|
|                                                          | Behavior   | Control    |        |                      |                |          |
| <b>QoL-Change</b>                                        |            |            |        |                      |                |          |
| • Overall                                                | 25.8±13.1  | 18.5±7.0   | 2(66)  | 0.68 [0.18, 1.17]    | 0%             | 0.008    |
| • RCT                                                    | 36.9±13.3  | 30.4±7.1   | 1(16)  | 0.58 [-0.43, 1.58]   | NA             | 0.26     |
| • NRCT                                                   | 22.2±13.0  | 14.7±7.0   | 1(50)  | 0.71 [0.13, 1.28]    | NA             | 0.02     |
| <b>QoL-Post intervention</b>                             |            |            |        |                      |                |          |
| • Overall                                                | 151.8±18.6 | 148.1±21.0 | 2(66)  | 0.25 [-0.24, 0.74]   | 0%             | 0.31     |
| • RCT                                                    | 164.5±5.3  | 159.3±9.5  | 1(16)  | 0.64 [-0.37, 1.66]   | NA             | 0.21     |
| • NRCT                                                   | 147±22.9   | 144.5±24.7 | 1(50)  | 0.13 [-0.42, 0.69]   | NA             | 0.64     |
| <b>Depression scale-Change</b>                           |            |            |        |                      |                |          |
| Overall                                                  | -5.3±4.9   | -0.7±5.5   | 3(140) | -0.84 [-1.20, -0.48] | 0%             | <0.00001 |
| RCT                                                      | -5.6±4.4   | -0.7±6.6   | 2(90)  | -0.90 [-1.37, -0.44] | 1%             | 0.0001   |
| NRCT                                                     | -4.7±6.0   | -0.8±4.2   | 1(50)  | -0.74 [-1.32, -0.17] | NA             | 0.01     |
| <b>Depression scale-Post intervention</b>                |            |            |        |                      |                |          |
| • Overall                                                | 38.7±4.9   | 39.6±5.5   | 3(140) | -0.69 [-1.06, -0.32] | 8%             | 0.0002   |
| • RCT                                                    | 43.6±4.4   | 48.2±6.6   | 2(90)  | -0.85 [-1.32, -0.38] | 4%             | 0.0004   |
| • NRCT                                                   | 26.8±6.0   | 29.2±4.2   | 1(50)  | -0.46 [-1.02, 0.11]  | NA             | 0.11     |
| <b>Functional independence measure-Change</b>            |            |            |        |                      |                |          |
| • NRCT                                                   | 5.8±7.5    | 5.2±9.9    | 1(50)  | 0.60 [-4.27, 5.47]   | NA             | 0.81     |
| <b>Functional independence measure-Post intervention</b> |            |            |        |                      |                |          |
| • NRCT                                                   | 74.2±7.5   | 72.9±9.9   | 1(50)  | 1.30 [-3.57, 6.17]   | NA             | 0.60     |

CI: Confidence intervals; ICU: Intensive care unit; I<sup>2</sup>, p: Heterogeneity; n: Number of studies; N: Number of patients; NA: Not applicable; NRCT: Non-randomized controlled trial; p: Statistical significance value; QoL: Quality of life; SD: Standard Deviation; MD: Mean Difference; RCT: Randomized controlled trial

Figure 16: Effect of behaviour therapy on QoL scores in patients with dysphagia after stroke

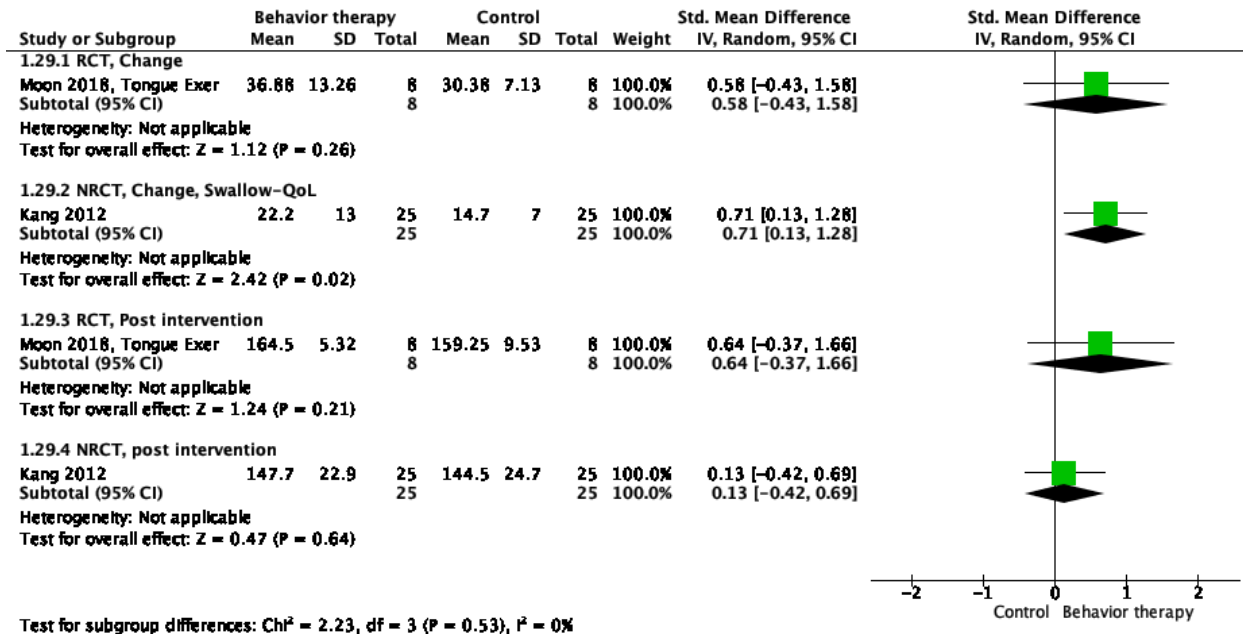

Figure 17: Effect of behavior therapy on Depression scores in patients with dysphagia after stroke

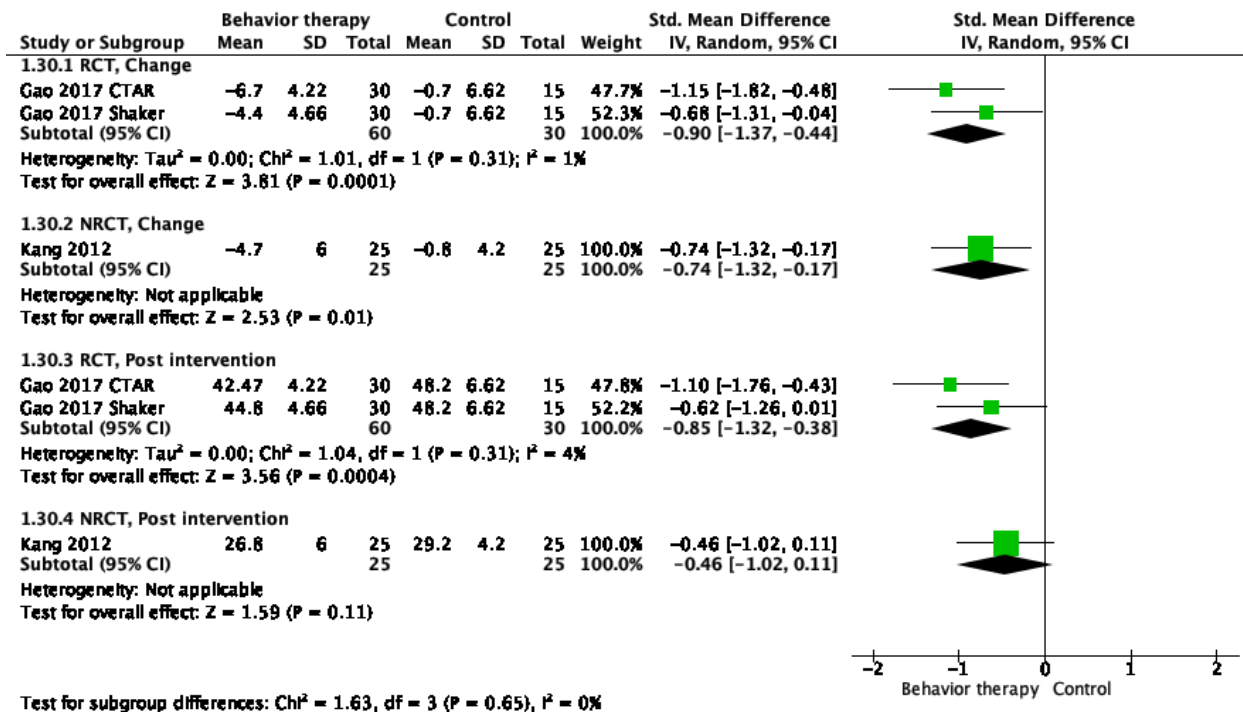



Figure 18: Effect of behaviour therapy on Functional independence measure scores in patients with dysphagia after stroke

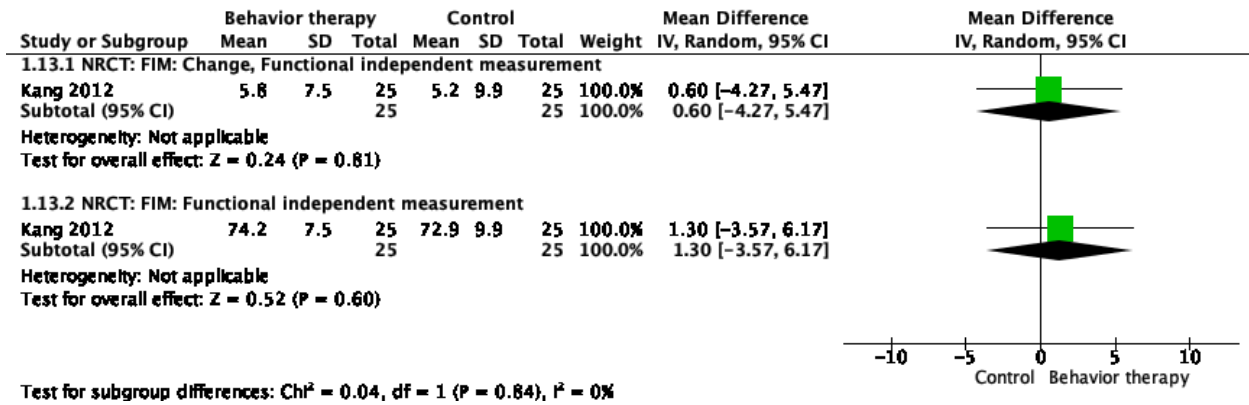

**Table 5: Effect of behaviour therapy on different outcomes in patients with dysphagia after stroke**

| Outcome                          | Incidence (%) |         | n (N)  | RR [95% CI]        | I <sup>2</sup> | P value |
|----------------------------------|---------------|---------|--------|--------------------|----------------|---------|
|                                  | Behavior      | Control |        |                    |                |         |
| <b>Efficacy parameters</b>       |               |         |        |                    |                |         |
| Dysphagia at end                 | 40.1%         | 57.5%   | 5(537) | 0.72 [0.61, 0.86]  | 21%            | 0.0002  |
| Recovery, RCT                    | 41.3%         | 18.9%   | 3(178) | 2.29 [1.38, 3.82]  | 0%             | 0.001   |
| Total effective rate, RCT        | 81.7%         | 40.0%   | 2(90)  | 2.04 [1.30, 3.22]  | 0%             | 0.04    |
| Normal diet, RCT                 | 66.7%         | 55.9%   | 1(306) | 1.19 [0.98, 1.45]  | NA             | 0.08    |
| Functional swallowing, RCT       | 45.6%         | 32.4%   | 1(306) | 1.41 [1.03, 1.94]  | NA             | 0.03    |
| <b>Adverse effects in RCTs</b>   |               |         |        |                    |                |         |
| • Stroke, RCT                    | 3.7%          | 6.4%    | 1(101) | 0.58 [0.10, 3.33]  | NA             | 0.54    |
| • Pulmonary thromboembolism, RCT | 0.0%          | 2.1%    | 1(101) | 0.29 [0.01, 6.98]  | NA             | 0.45    |
| • Airway obstruction, RCT        | 0%            | 1%      | 1(115) | 0.64 [0.03, 15.40] | NA             | 0.78    |
| • Depression, RCT                | 13.3%         | 33.3%   | 1(90)  | 0.41 [0.18, 0.93]  | 0%             | 0.03    |
| • Dehydration, RCT               | 36.3%         | 47.0%   | 1(437) | 0.57 [0.27, 1.20]  | NA             | 0.7     |
| • Hip fracture, RCT              | 1.9%          | 2.1%    | 1(101) | 0.87 [0.06, 13.53] | NA             | 0.92    |
| • Complications, RCT             | 36.3%         | 47.0%   | 3(437) | 0.57 [0.27, 1.20]  | 62%            | 0.14    |
| • Institutionalization           | 17.6%         | 25.5%   | 1(306) | 0.69 [0.44, 1.08]  | NA             | 0.11    |

CI: Confidence intervals; I<sup>2</sup>, p: Heterogeneity; n: Number of studies; N: Number of patients; NA: Not applicable; p: Statistical significance value; RR: Risk Ratio

Figure 19: Effect of behavior therapy on Efficacy scores in patients with dysphagia after stroke

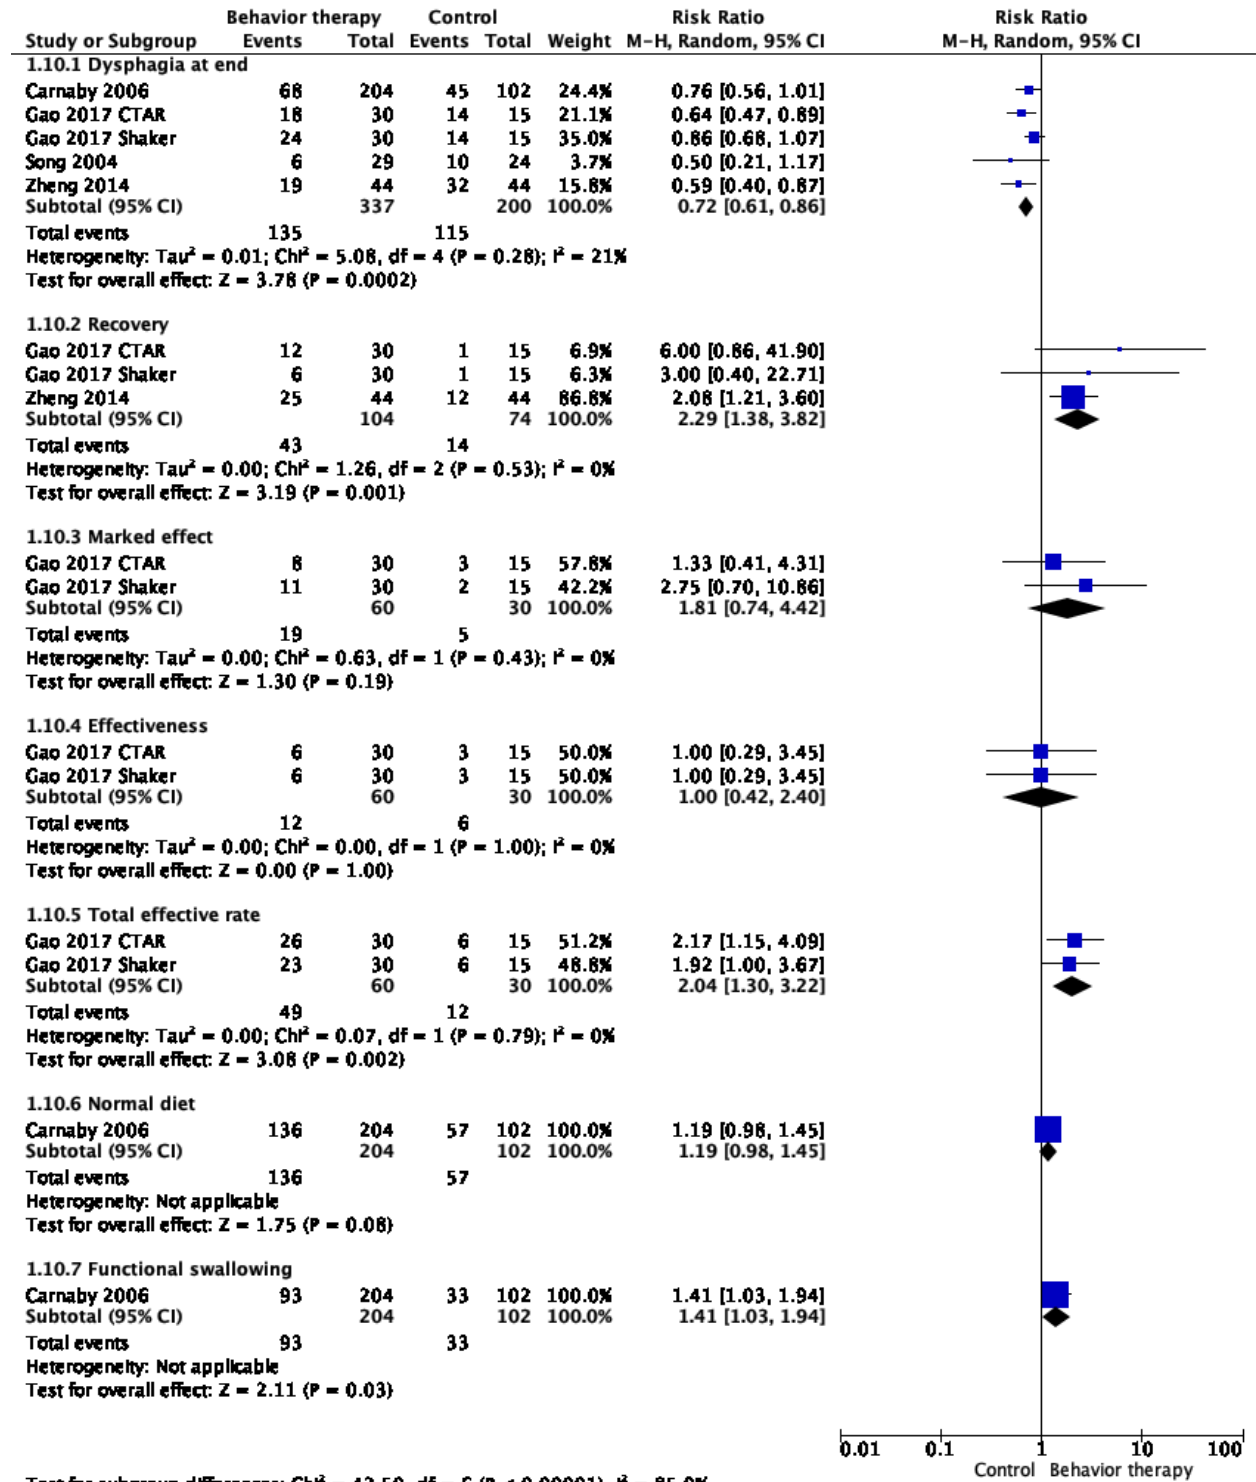

Figure 20: Effect of behaviour therapy on Adverse effects scores in patients with dysphagia after stroke

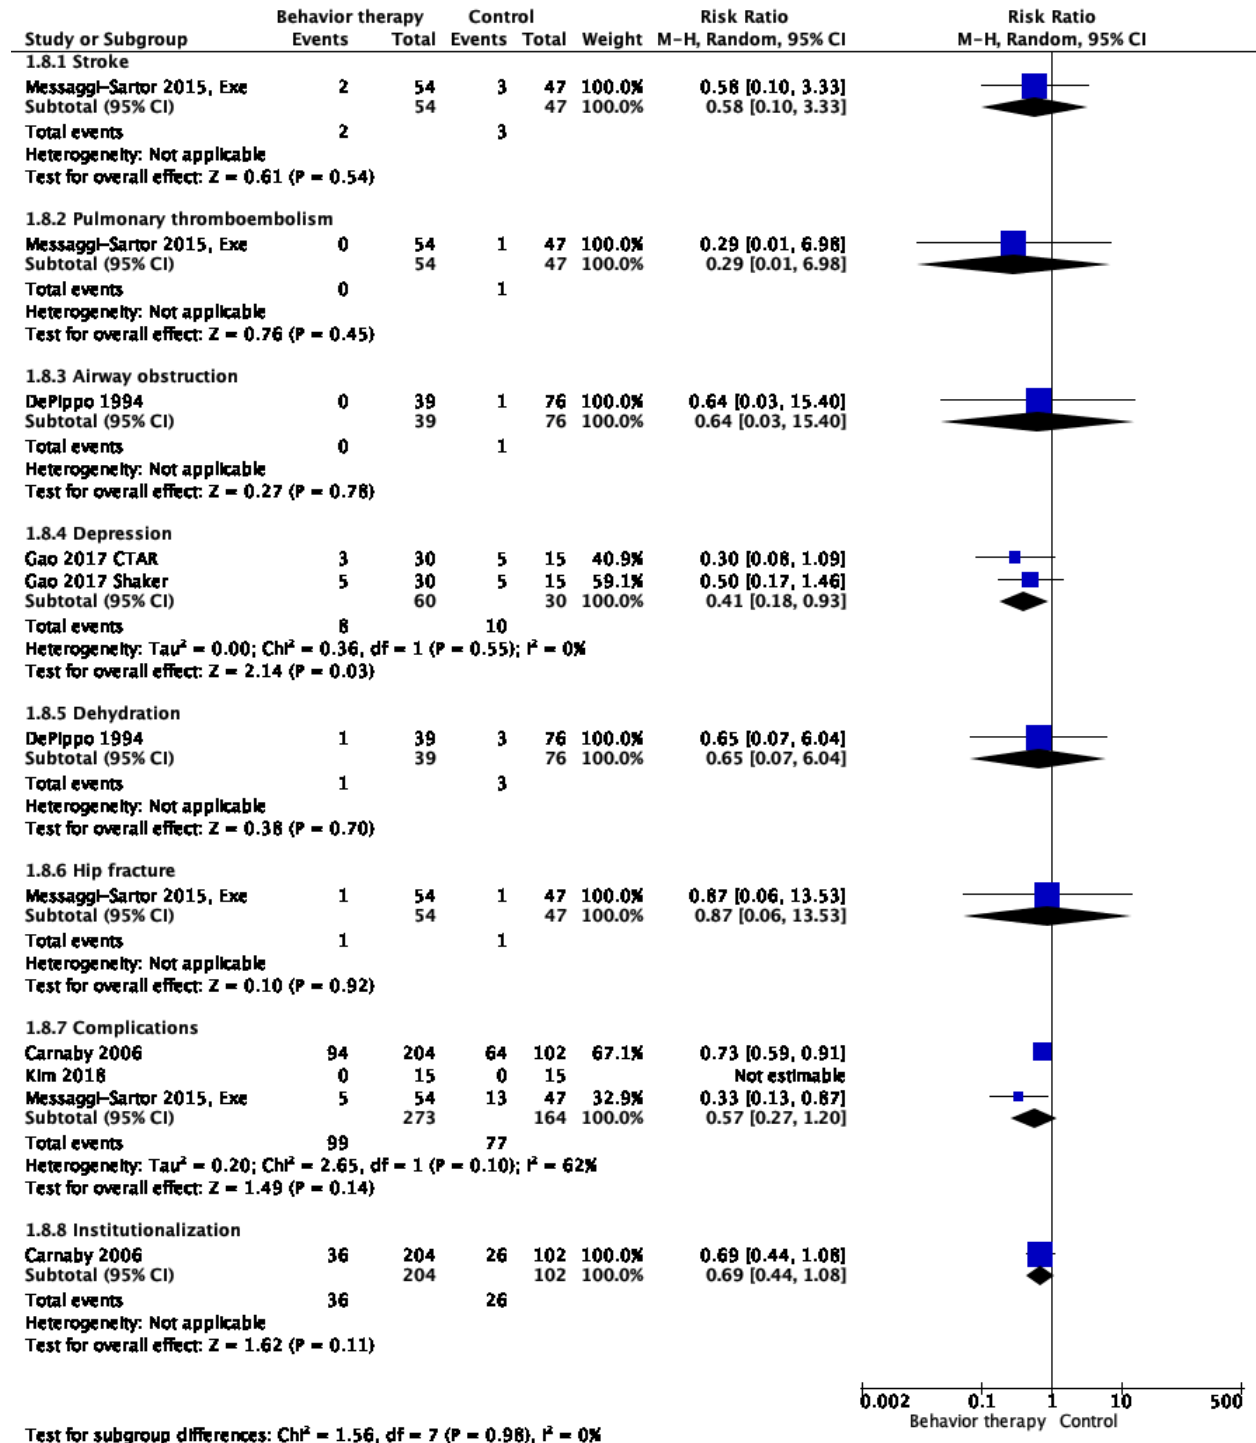

**Table 6: Effect of behaviour therapy (tongue exercises) on tongue pressure in patients with dysphagia after stroke**

| Outcome                        | Mean±SD  |          | n (N) | MD [95% CI]         | I <sup>2</sup> | P value |
|--------------------------------|----------|----------|-------|---------------------|----------------|---------|
|                                | Behavior | Control  |       |                     |                |         |
| <b>Tongue pressures, RCT</b>   |          |          |       |                     |                |         |
| <b>Anterior pressure, RCT</b>  |          |          |       |                     |                |         |
| • Change                       | 7.6±5.7  | 1.7±4.7  | 2(47) | 8.08 [-5.83, 21.98] | 96%            | 0.25    |
| • Post intervention            | 35.7±7.6 | 29.3±7.6 | 3(82) | 7.00 [-3.56, 17.56] | 91%            | 0.19    |
| <b>Posterior pressure, RCT</b> |          |          |       |                     |                |         |
| • Change                       | 18.8±5.4 | 12.1±6.3 | 3(58) | 8.73 [-6.50, 23.96] | 97%            | 0.26    |
| • Post intervention            | 35.0±6.7 | 25.8±6.9 | 4(93) | 11.42 [1.06, 21.78] | 94%            | 0.03    |

CI: Confidence intervals; I<sup>2</sup>, p: Heterogeneity; n: Number of studies; N: Number of patients; NA: Not applicable; p: Statistical significance value; SD: Standard Deviation; MD: Mean Difference

Figure 21: Effect of tongue exercises on tongue pressures scores in patients with dysphagia after stroke

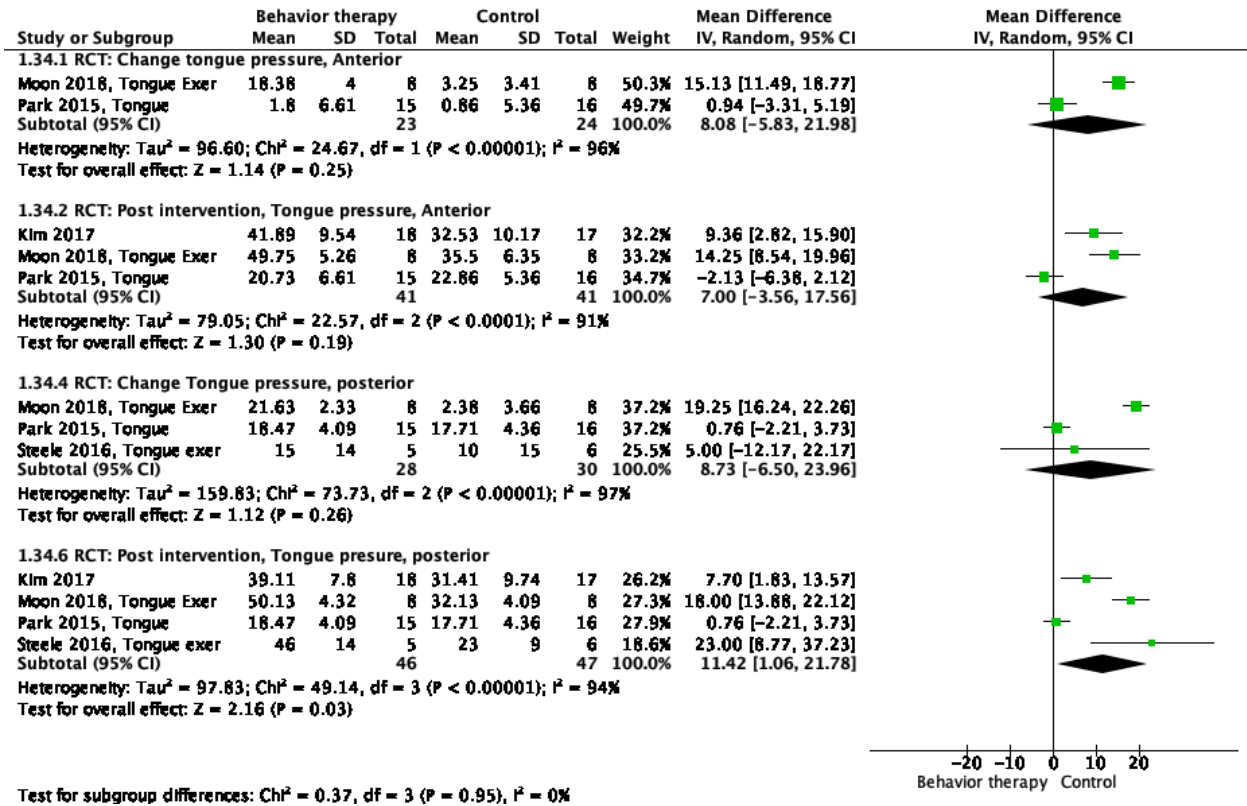

**Table 7: Effect of behaviour therapy on pharyngeal outcomes in patients with dysphagia after stroke**

| Outcome                                        | Mean±SD/ % |           | n (N) | MD/ RR [95% CI]        | I <sup>2</sup> | P value   |
|------------------------------------------------|------------|-----------|-------|------------------------|----------------|-----------|
|                                                | Behavior   | Control   |       |                        |                |           |
| <b>Pharyngeal outcomes</b>                     |            |           |       |                        |                |           |
| <b>Swallowing exercises</b>                    |            |           |       |                        |                |           |
| <b>Pharyngeal residue, Vallecular, RCT</b>     |            |           |       |                        |                |           |
| • Change, RCT                                  | 22.2%      | 13.9%     | 1(72) | 1.60 [0.58, 4.43]      | NA             | 0.37      |
| • Post intervention, RCT                       | 44.4%      | 47.2%     | 1(72) | 0.94 [0.57, 1.56]      | NA             | 0.81      |
| <b>Pharyngeal residue, Piriform sinus, RCT</b> |            |           |       |                        |                |           |
| • Change, RCT                                  | 38.9%      | 16.7%     | 1(72) | 2.33 [1.01, 5.39]      | NA             | 0.05      |
| • Post intervention- RCT                       | 27.8%      | 61.1%     | 1(72) | 0.45 [0.25, 0.82]      | NA             | 0.009     |
| <b>Pharyngeal remnant</b>                      |            |           |       |                        |                |           |
| • Change, RCT                                  | -20.9±8.1  | -10.4±1.6 | 1(28) | -10.50 [-14.69, -6.31] | NA             | < 0.00001 |
| • Post intervention, RCT                       | 22.4±13.3  | 33.8±11.6 | 1(28) | -11.40 [-20.62, -2.18] | NA             | 0.02      |
| <b>With EMST</b>                               |            |           |       |                        |                |           |
| <b>Vesicular residue</b>                       |            |           |       |                        |                |           |
| • Change, RCT                                  | -1.1±0.3   | -0.6±0.5  | 1(18) | -0.55 [-0.96, -0.14]   | NA             | 0.008     |
| • Post intervention, RCT                       | 0.3±0.5    | 1.1±0.6   | 1(18) | -0.78 [-1.29, -0.27]   | NA             | 0.003     |
| <b>Piriform sinus residue</b>                  |            |           |       |                        |                |           |
| • Change, RCT                                  | -0.6±0.5   | -0.2±0.4  | 1(18) | -0.34 [-0.79, 0.11]    | NA             | 0.14      |
| • Post intervention, RCT                       | 0.6±0.5    | 0.9±0.6   | 1(18) | -0.33 [-0.85, 0.19]    | NA             | 0.22      |

CI: Confidence intervals; I<sup>2</sup>, p: Heterogeneity; n: Number of studies; N: Number of patients; NA: Not applicable; p: Statistical significance value; SD: Standard Deviation; MD: Mean Difference; RR: Risk Ratio

**Fig 22: Effect of behaviour therapy on Pharyngeal outcomes scores in patients with dysphagia after stroke**

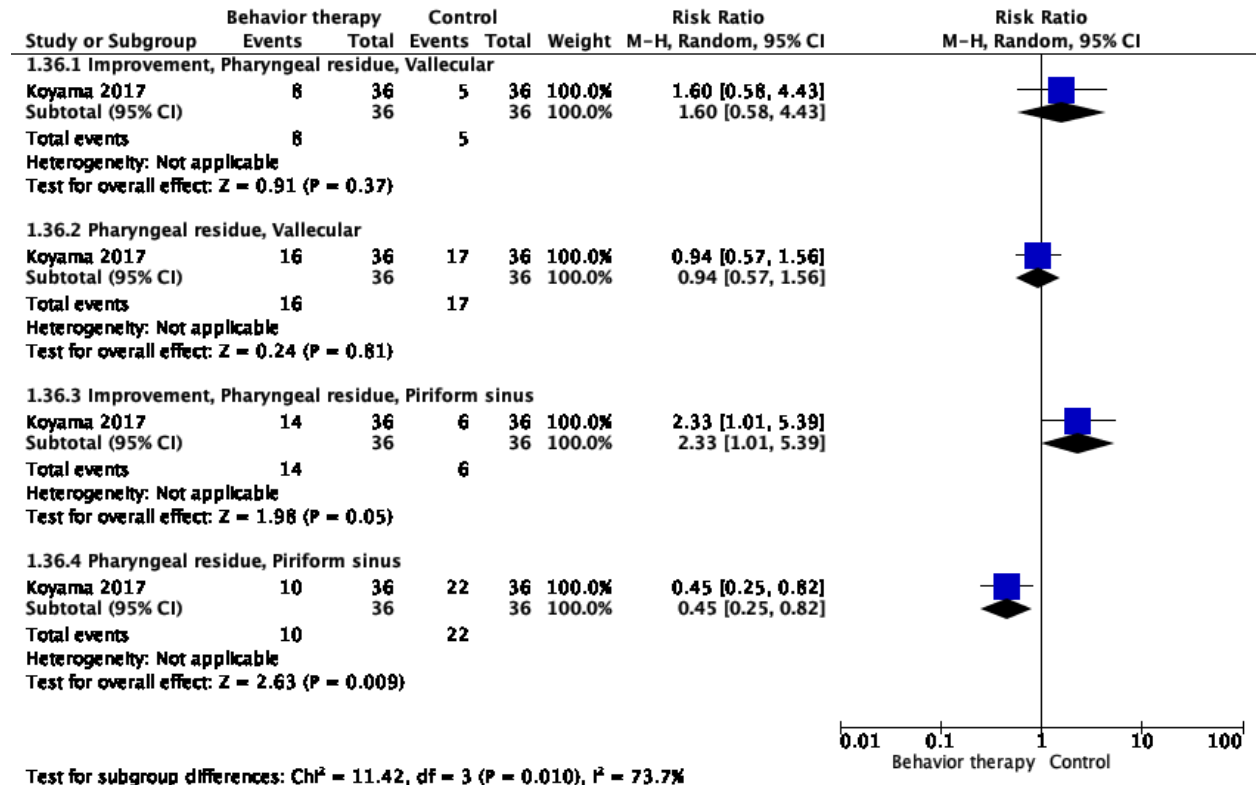



**Fig 23: Effect of behaviour therapy on pharyngeal outcomes scores in patients with dysphagia after stroke**

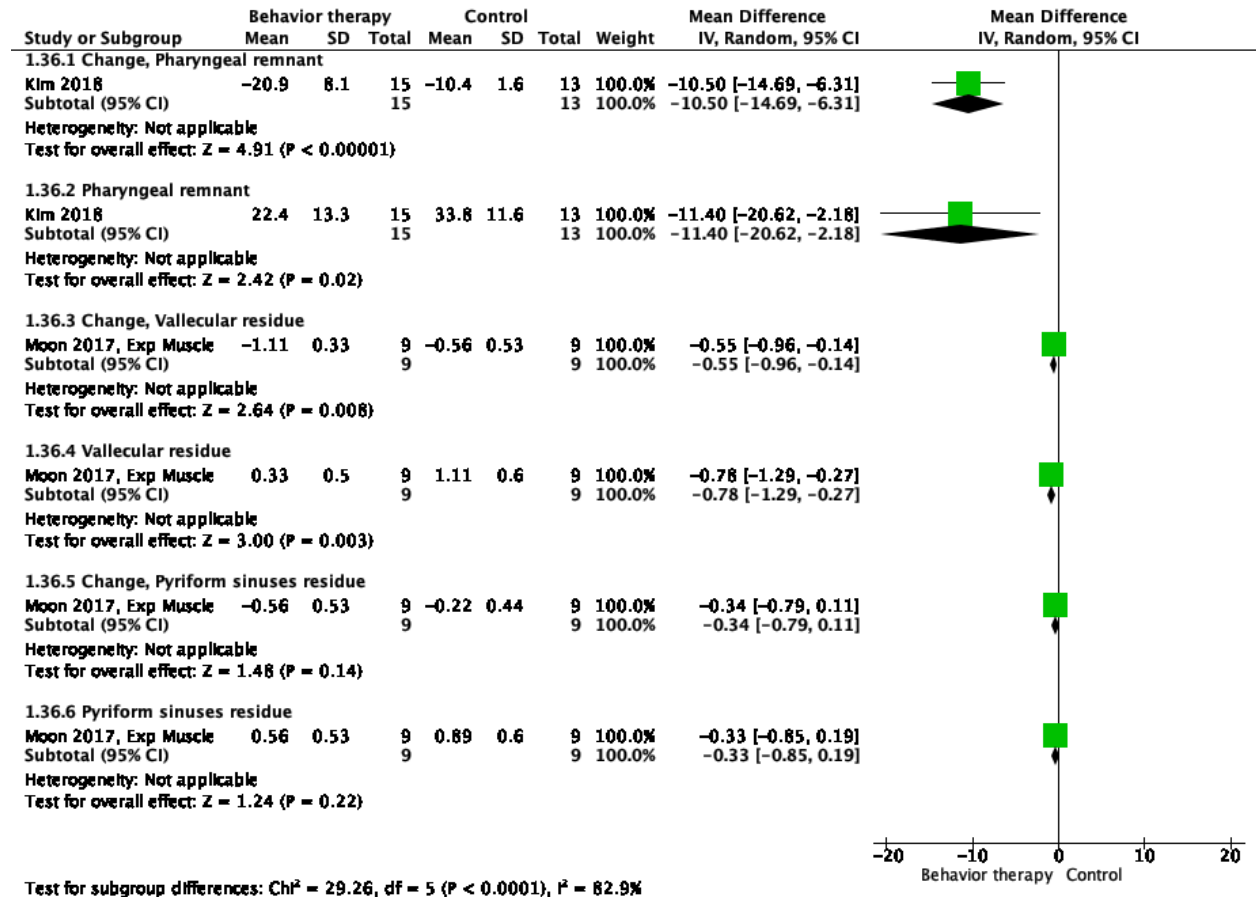

**Table 8: Effect of behaviour therapy on pharyngeal timings in patients with dysphagia after stroke**

| Outcome                                 | Mean±SD  |         | n (N) | MD [95% CI]          | I <sup>2</sup> | P value  |
|-----------------------------------------|----------|---------|-------|----------------------|----------------|----------|
|                                         | Behavior | Control |       |                      |                |          |
| <b>Pharyngeal transit time</b>          |          |         |       |                      |                |          |
| • RCT                                   | 3.5±1.3  | 3.9±2.3 | 2(44) | -0.19 [-0.24, -0.14] | 0%             | < 0.0001 |
| <b>Swallow response time</b>            |          |         |       |                      |                |          |
| • RCT                                   | 0.8±0.3  | 0.6±0.2 | 1(16) | 0.27 [-0.00, 0.54]   | NA             | 0.05     |
| <b>Oral transit time</b>                |          |         |       |                      |                |          |
| • RCT                                   | 0.4±0.0  | 0.4±0.1 | 1(16) | -0.02 [-0.08, 0.04]  | NA             | 0.53     |
| <b>Laryngeal closure time</b>           |          |         |       |                      |                |          |
| • RCT                                   | 0.8±0.1  | 0.9±0.2 | 1(16) | -0.16 [-0.29, -0.03] | NA             | 0.02     |
| <b>Cricopharyngeal opening duration</b> |          |         |       |                      |                |          |
| • RCT                                   | 0.6±0.2  | 0.6±0.0 | 1(16) | -0.04 [-0.18, 0.10]  | NA             | 0.57     |
| <b>Duration of stage transition</b>     |          |         |       |                      |                |          |
| • RCT                                   | 0.9±1.2  | 1.3±1.5 | 1(20) | -0.36 [-1.55, 0.83]  | NA             | 0.55     |
| <b>Total swallow duration</b>           |          |         |       |                      |                |          |
| • RCT                                   | 2.4±1.3  | 3.0±1.6 | 1(20) | -0.52 [-1.77, 0.73]  | NA             | 0.42     |

CI: Confidence intervals; I<sup>2</sup>, p: Heterogeneity; n: Number of studies; N: Number of patients; NA: Not applicable; p: Statistical significance value; SD: Standard Deviation; MD: Mean Difference

Figure 24: Effect of behaviour therapy on Pharyngeal timings scores in patients with dysphagia after stroke

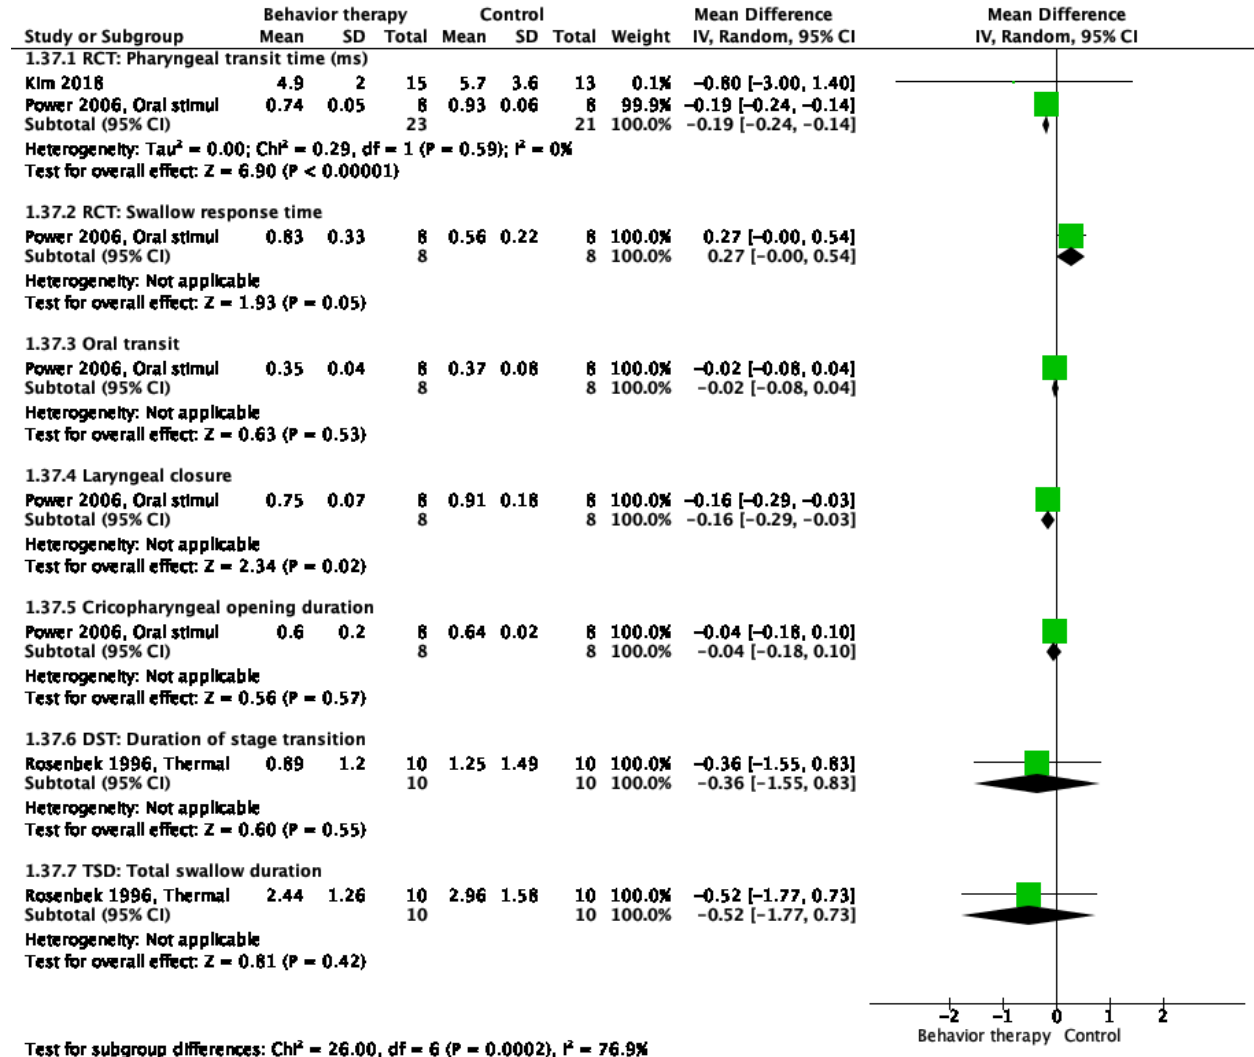

**Table 9: Effect of behaviour therapy on hyoid bone, laryngeal and epiglottis movements in patients with dysphagia after stroke**

| Outcome                                | Mean±SD   |           | n (N) | MD [95% CI]          | I <sup>2</sup> | P value |
|----------------------------------------|-----------|-----------|-------|----------------------|----------------|---------|
|                                        | Behavior  | Control   |       |                      |                |         |
| <b>Larynx</b>                          |           |           |       |                      |                |         |
| <b>Larynx, horizontal displacement</b> |           |           |       |                      |                |         |
| • RCT                                  | 0.9±0.4   | 0.9±0.5   | 1(27) | 0.01 [-0.31, 0.33]   | NA             | 0.95    |
| <b>Larynx, vertical displacement</b>   |           |           |       |                      |                |         |
| • RCT                                  | 2.1±0.7   | 2.2±0.6   | 1(27) | -0.02 [-0.49, 0.45]  | NA             | 0.93    |
| <b>Hyoid bone</b>                      |           |           |       |                      |                |         |
| <b>Horizontal excursion (cm)</b>       |           |           |       |                      |                |         |
| • RCT                                  | 1.9±0.6   | 1.7±0.5   | 1(71) | 0.13 [-0.12, 0.37]   | 0%             | 0.31    |
| <b>Horizontal excursion (cm)</b>       |           |           |       |                      |                |         |
| • RCT                                  | 2.3±0.7   | 1.9±0.6   | 1(71) | 0.41 [0.12, 0.70]    | 0%             | 0.05    |
| <b>Superior displacement</b>           |           |           |       |                      |                |         |
| • RCT                                  | 1.7±0.6   | 1.2±0.3   | 1(12) | 0.46 [-0.02, 0.94]   | NA             | 0.06    |
| <b>Anterior displacement</b>           |           |           |       |                      |                |         |
| • RCT                                  | 1.4±0.2   | 1.3±0.3   | 1(12) | 0.06 [-0.21, 0.33]   | NA             | 0.66    |
| <b>Epiglottis</b>                      |           |           |       |                      |                |         |
| <b>Rotation</b>                        |           |           |       |                      |                |         |
| • RCT                                  | 51.0±17.8 | 41.0±20.2 | 1(24) | 10.00 [-1.24, 21.24] | NA             | 0.08    |

CI: Confidence intervals; ICU: Intensive care unit; I<sup>2</sup>, p: Heterogeneity; n: Number of studies; N: Number of patients; NA: Not applicable; p: Statistical significance value; SD: Standard Deviation; MD: Mean Difference

Fig 25: Effect of behaviour therapy on Hyoid bone, larynx and epiglottis movements scores in patients with dysphagia after stroke

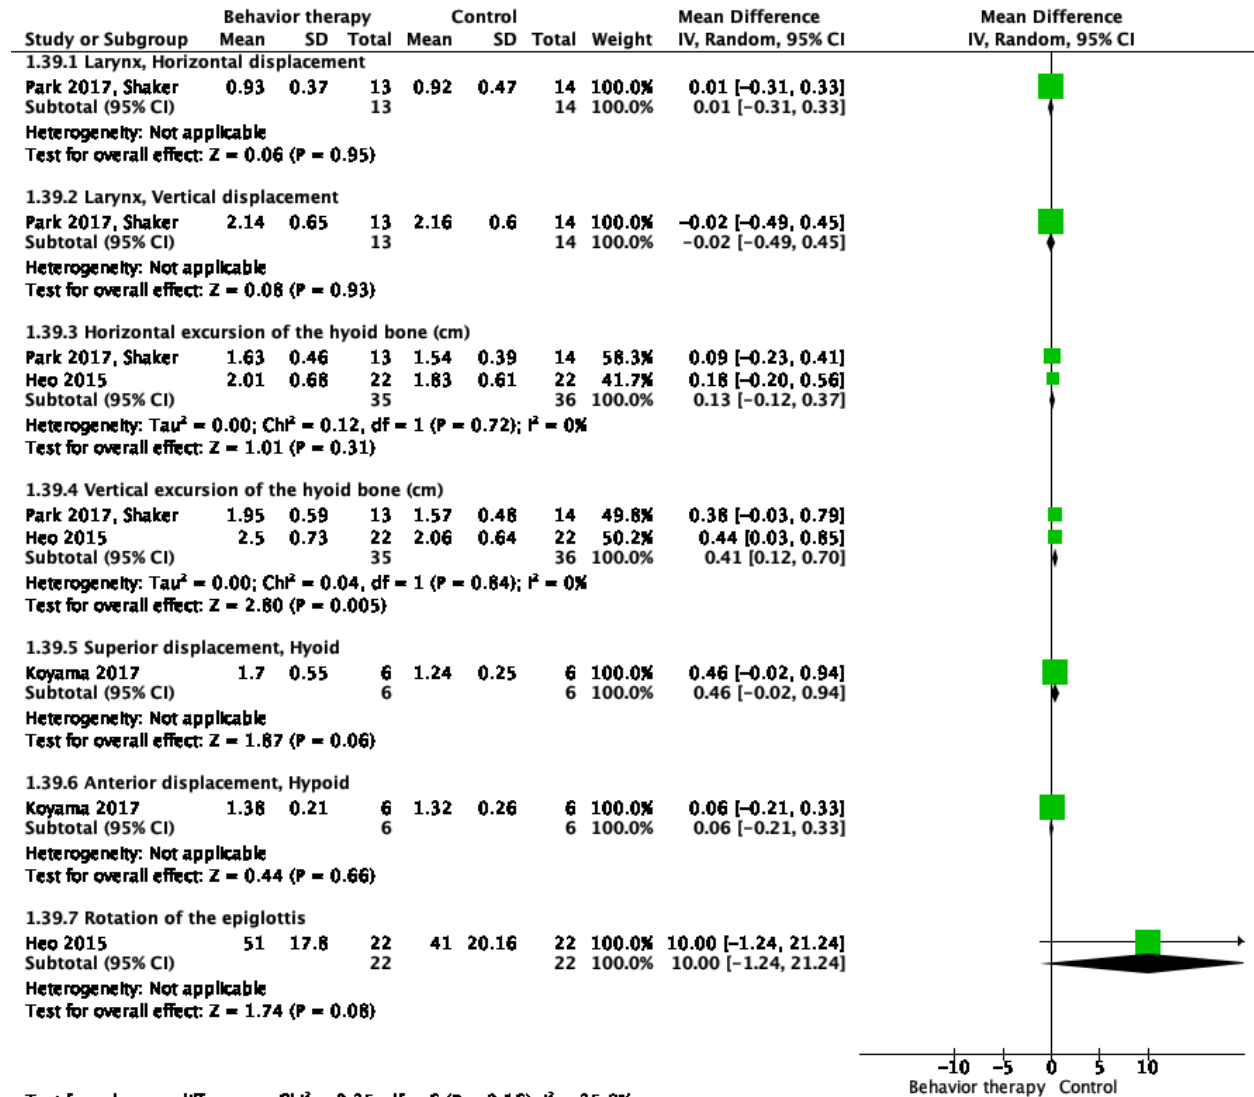

**Table 10: Effect of behaviour therapy on hyoid bone, laryngeal and epiglottis movements in patients with dysphagia after stroke**

| Outcome                  | Mean±SD  |          | n (N) | MD [95% CI]       | I <sup>2</sup> | P value |
|--------------------------|----------|----------|-------|-------------------|----------------|---------|
|                          | Behavior | Control  |       |                   |                |         |
| <b>sEMG with ESMT</b>    |          |          |       |                   |                |         |
| <b>Change</b>            |          |          |       |                   |                |         |
| • RCT                    | 0.9±1.0  | -0.1±0.7 | 1(27) | 1.12 [0.30, 1.94] | NA             | 0.002   |
| <b>Post-intervention</b> |          |          |       |                   |                |         |
| • RCT                    | 5.6±0.9  | 4.8±0.8  | 1(27) | 0.91 [0.11, 1.71] | NA             | 0.01    |

CI: Confidence intervals; ICU: Intensive care unit; I<sup>2</sup>: Heterogeneity; n: Number of studies; N: Number of patients; NA: Not applicable; p: Statistical significance value; SD: Standard Deviation; SMD: Standard Mean Difference

**Figure 26: Effect of behavior therapy on sEMG scores in patients with dysphagia after stroke**

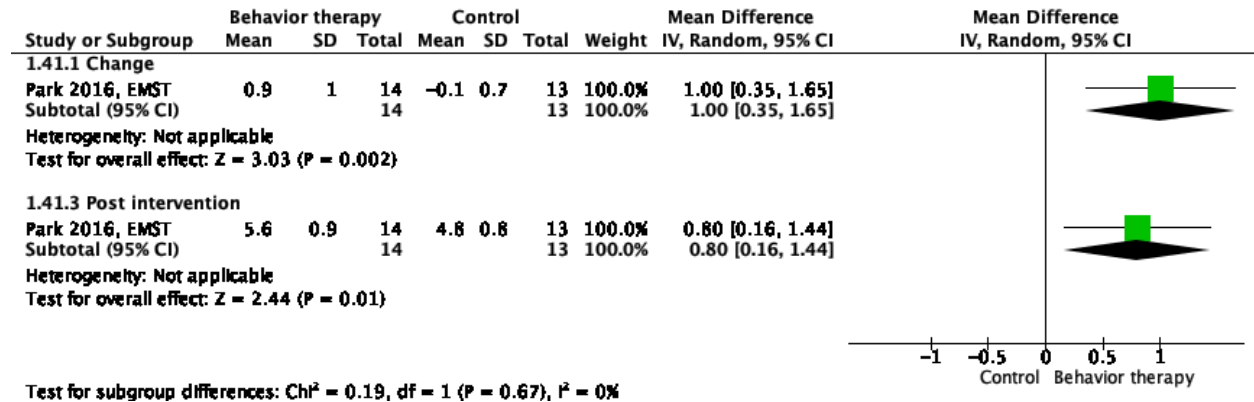

**Table 11: Effect of behaviour therapy on neurological examination, Hb, arm circumference scores in patients with dysphagia after stroke**

| Outcome                         | Mean±SD  |          | n (N) | MD [95% CI]          | I <sup>2</sup> | P value |
|---------------------------------|----------|----------|-------|----------------------|----------------|---------|
|                                 | Behavior | Control  |       |                      |                |         |
| <b>Neurological examination</b> |          |          |       |                      |                |         |
| • Change, NRCT                  | -1.8±1.8 | -0.5±2.1 | 1(49) | -1.33 [-2.58, -0.08] | NA             | 0.04    |
| <b>Hb</b>                       |          |          |       |                      |                |         |
| • Change, NRCT                  | -0.3±1.0 | -0.1±0.8 | 1(49) | -0.11 [-0.63, 0.41]  | NA             | 0.68    |
| <b>Mid-arm circumference</b>    |          |          |       |                      |                |         |
| • Change, NRCT                  | 0.7±1.8  | 0.9±2.1  | 1(49) | 1.53 [0.26, 2.80]    | NA             | 0.02    |

CI: Confidence intervals; I<sup>2</sup>, p: Heterogeneity; n: Number of studies; N: Number of patients; NA: Not applicable; p: Statistical significance value; SD: Standard Deviation; MD: Mean Difference

**Figure 27: Effect of behavior therapy on Neurological examination, Hb, arm circumference**

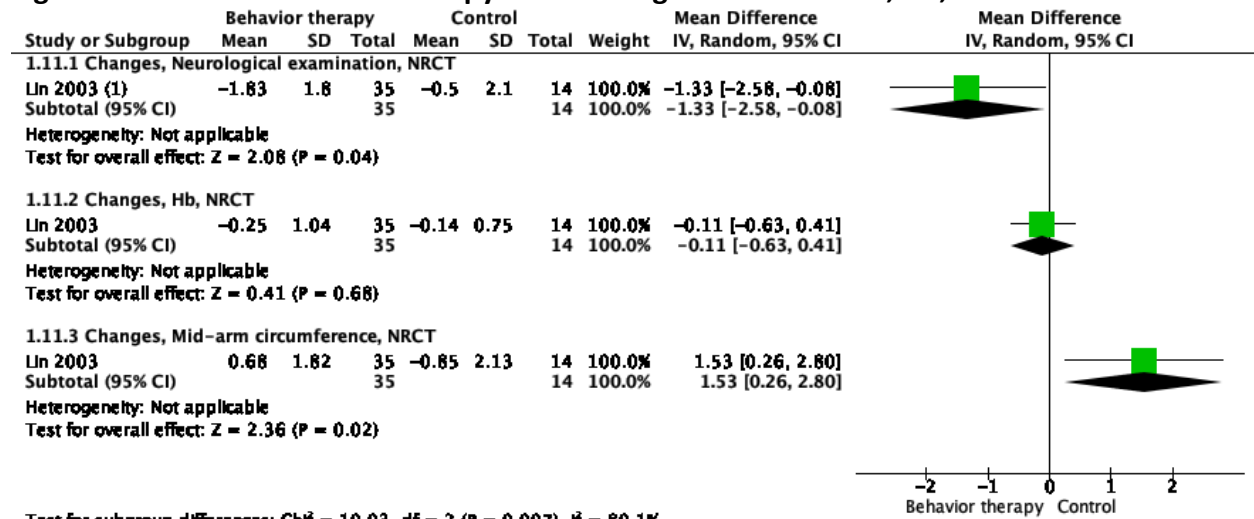

**Table 12: Effect of behaviour therapy on swallowing functions scores in patients with dysphagia after stroke**

| Outcome                                     | Mean±SD  |          | n (N) | MD [95% CI]           | I <sup>2</sup> | P value |
|---------------------------------------------|----------|----------|-------|-----------------------|----------------|---------|
|                                             | Behavior | Control  |       |                       |                |         |
| <b>Swallow vol/ sec</b>                     |          |          |       |                       |                |         |
| • Change, NRCT                              | 1.6±3.8  | -1.4±4.3 | 1(49) | 2.97 [0.39, 5.55]     | NA             | 0.02    |
| <b>Volume/swallow</b>                       |          |          |       |                       |                |         |
| • Change, NRCT                              | 4.2±8.8  | -1.6±8.7 | 1(49) | 5.75 [0.34, 11.16]    | NA             | 0.04    |
| <b>Cough/ Choking at timed swallow test</b> |          |          |       |                       |                |         |
| • Change, NRCT                              | -0.2±0.6 | 0.0±0.4  | 1(49) | -0.24 [-0.53, 0.05]   | NA             | 0.10    |
| <b>Coughing/ Choking at meals</b>           |          |          |       |                       |                |         |
| • Change, NRCT                              | -5.3±8.6 | 2.4±6.8  | 1(49) | -7.72 [-12.30, -3.14] | NA             | 0.009   |
| <b>Swallow questionnaire</b>                |          |          |       |                       |                |         |
| • Change, NRCT                              | -0.5±1.6 | 0.3±0.7  | 1(49) | -0.80 [-1.46, -0.14]  | NA             | 0.02    |

CI: Confidence intervals; I<sup>2</sup>, p: Heterogeneity; n: Number of studies; N: Number of patients; NA: Not applicable; p: Statistical significance value; SD: Standard Deviation; MD: Mean Difference

**Figure 28: Effect of behaviour therapy on swallowing functions scores in patients with dysphagia after stroke**

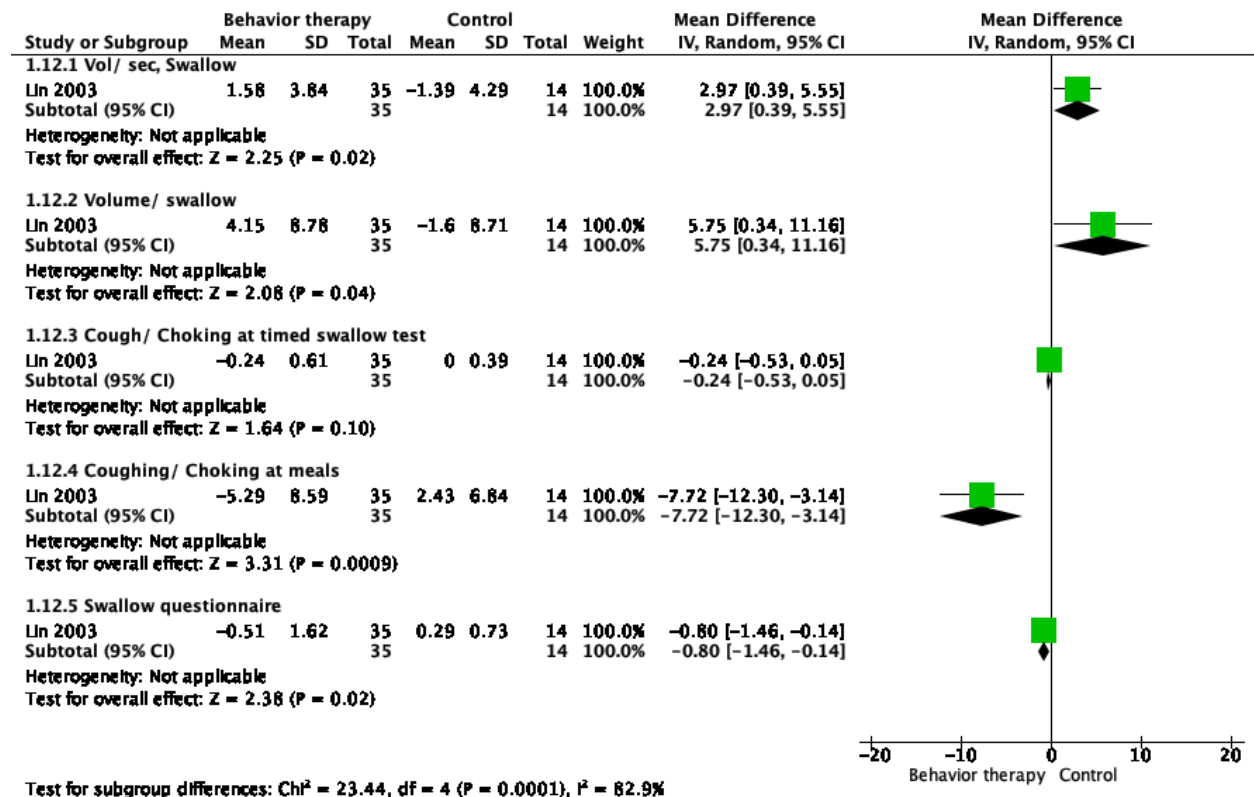



**Table 13: Effect of early compared to late initiation of behavioural therapy on mRS and swallowing in patients with post-stroke dysphagia**

| Outcome                                               | Incidence (%)   |                | n (N)   | RR [95% CI]       | I <sup>2</sup> | P value |
|-------------------------------------------------------|-----------------|----------------|---------|-------------------|----------------|---------|
|                                                       | Early nutrition | Late nutrition |         |                   |                |         |
| <b>Oral stage of swallowing problem, NWDPCS</b>       |                 |                |         |                   |                |         |
| • RCT                                                 | 0.0%            | 15.0%          | 1(60)   | 0.13 [0.02, 1.13] | 0%             | 0.07    |
| <b>Pharyngeal stage of swallowing problem, NWDPCS</b> |                 |                |         |                   |                |         |
| • RCT                                                 | 10.0%           | 25.0%          | 1(60)   | 0.42 [0.10, 1.77] | 18%            | 0.24    |
| <b>Aspiration risk, NWDPCS</b>                        |                 |                |         |                   |                |         |
| • RCT                                                 | 12.5%           | 30.0%          | 1(60)   | 0.43 [0.12, 1.55] | 18%            | 0.2     |
| <b>Pharyngeal delay</b>                               |                 |                |         |                   |                |         |
| • RCT                                                 | 12.5%           | 25.0%          | 1(60)   | 0.48 [0.08, 2.72] | 45%            | 0.41    |
| <b>Infections</b>                                     |                 |                |         |                   |                |         |
| • RCT                                                 | 33.3%           | 52.1%          | 1(146)  | 0.64 [0.43, 0.94] | NA             | 0.02    |
| <b>Pressure sores</b>                                 |                 |                |         |                   |                |         |
| • RCT                                                 | 0.7%            | 1.3%           | 1(4023) | 0.57 [0.31, 1.08] | NA             | 0.09    |
| <b>GIT hemorrhage</b>                                 |                 |                |         |                   |                |         |
| • RCT                                                 | 5.1%            | 2.6%           | 1(859)  | 2.00 [0.98, 4.08] | NA             | 0.06    |
| <b>Malnutrition</b>                                   |                 |                |         |                   |                |         |
| • RCT                                                 | 27.1%           | 48.3%          | 1(128)  | 0.56 [0.35, 0.90] | NA             | 0.02    |

CI: Confidence intervals; GIT: Gastrointestinal; I<sup>2</sup>, p: Heterogeneity; n: Number of studies; N: Number of patients; NA: Not applicable; NWDPCS: North-Western dysphagia patients check sheet; p: Statistical significance value; RR: Risk Ratio

Figure 29: Effect of early compared to late initiation of behavioural therapy on swallowing functions in patients with post-stroke dysphagia

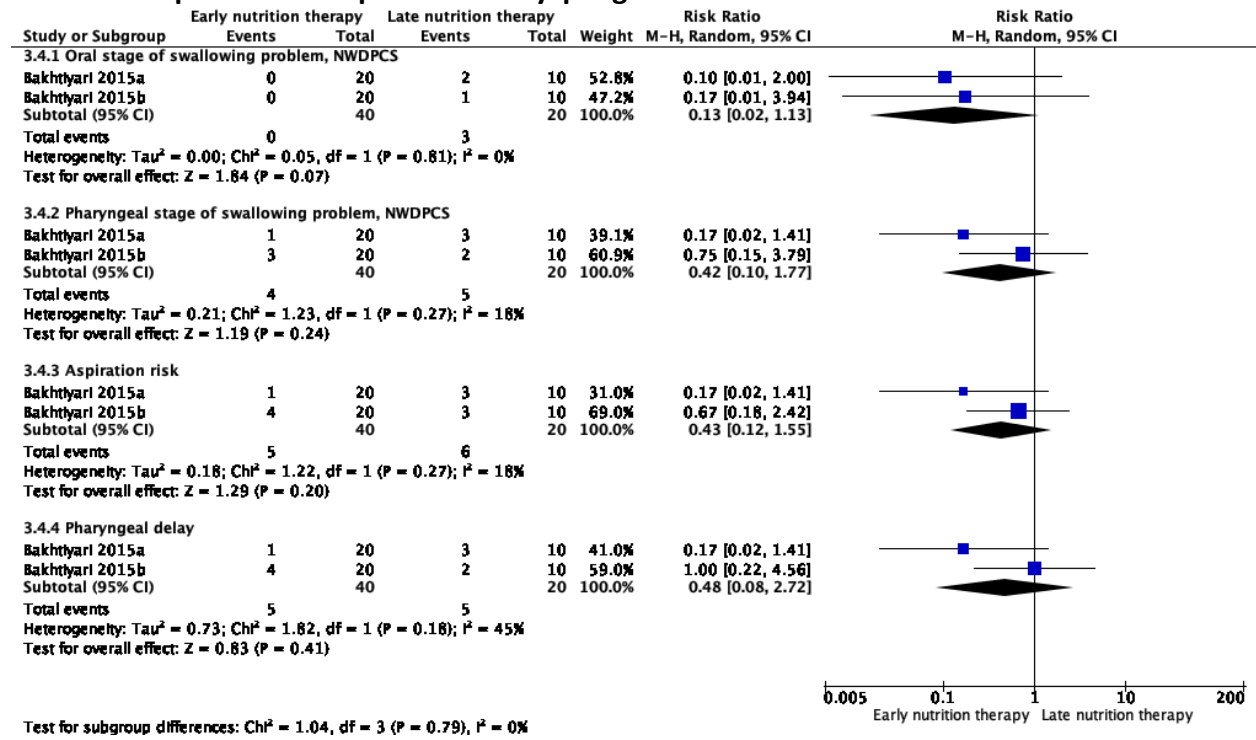

## Treatment 2b - Acupuncture

Table 1: Effect of acupuncture on dysphagia in patients with dysphagia after stroke

| Outcome                                 | Mean±SD/ Incidence (%) |         | n (N)    | MD/OR [95% CI]       | I <sup>2</sup> | P value   |
|-----------------------------------------|------------------------|---------|----------|----------------------|----------------|-----------|
|                                         | Acupuncture            | Control |          |                      |                |           |
| <b>Dysphagia at end</b>                 | 20.0%                  | 39.6%   | 23(2177) | 0.51 [0.41, 0.63]    | 58%            | < 0.00001 |
| <b>Dysphagia score, overall*</b>        |                        |         |          |                      |                |           |
| • Improvement                           | 4.0±0.8                | 2.8±0.9 | 3(292)   | 1.05 [0.45, 1.65]    | 81%            | 0.0006    |
| • Post intervention                     | 1.5±0.7                | 2.1±0.9 | 5(443)   | -0.63 [-1.12, -0.14] | 84%            | 0.01      |
| <b>DOSS</b>                             |                        |         |          |                      |                |           |
| • Change                                | 4.0±1.3                | 2.1±1.1 | 1(120)   | 1.90 [1.47, 2.33]    | NA             | < 0.00001 |
| • Post intervention                     | 5.8±1.3                | 3.7±1.1 | 1(120)   | 2.10 [1.67, 2.53]    | NA             | < 0.00001 |
| <b>VFSS</b>                             |                        |         |          |                      |                |           |
| • Change                                | 4.5±0.5                | 3.8±0.8 | 1(133)   | 0.71 [0.49, 0.93]    | NA             | < 0.00001 |
| • Post intervention                     | 9.8±0.5                | 9.4±0.8 | 1(133)   | 0.42 [0.20, 0.64]    | NA             | < 0.0001  |
| <b>RBHOMS</b>                           |                        |         |          |                      |                |           |
| • Change                                | 2.1±0.6                | 1.9±0.6 | 1(39)    | 0.20 [-0.18, 0.58]   | NA             | 0.30      |
| • Post intervention                     | 7.4±0.6                | 7.2±0.6 | 1(39)    | 0.20 [-0.18, 0.58]   | NA             | 0.30      |
| <b>WST</b>                              |                        |         |          |                      |                |           |
| • Change                                | NR                     | NR      | NA       | NA                   | NA             | NA        |
| • Post intervention                     | 2.4±0.6                | 2.9±0.9 | 2(151)   | -0.60 [-0.84, -0.36] | 0%             | < 0.00001 |
| <b>Latent time in swallowing reflux</b> |                        |         |          |                      |                |           |
| • Post intervention                     | 1.6±0.3                | 4.6±1.6 | 2(52)    | -3.43 [-8.32, 1.47]  | 97%            | 0.17      |

\*: Standard Mean Difference; CI: Confidence intervals; I<sup>2</sup>: Heterogeneity; n: Number of studies; N: Number of patients; NA: Not applicable; NR: Not reported; p: Statistical significance value; SD: Standard Deviation;; WST: Water swallow test

Figure 1: Effect of acupuncture on dysphagia at end in patients with dysphagia with stroke

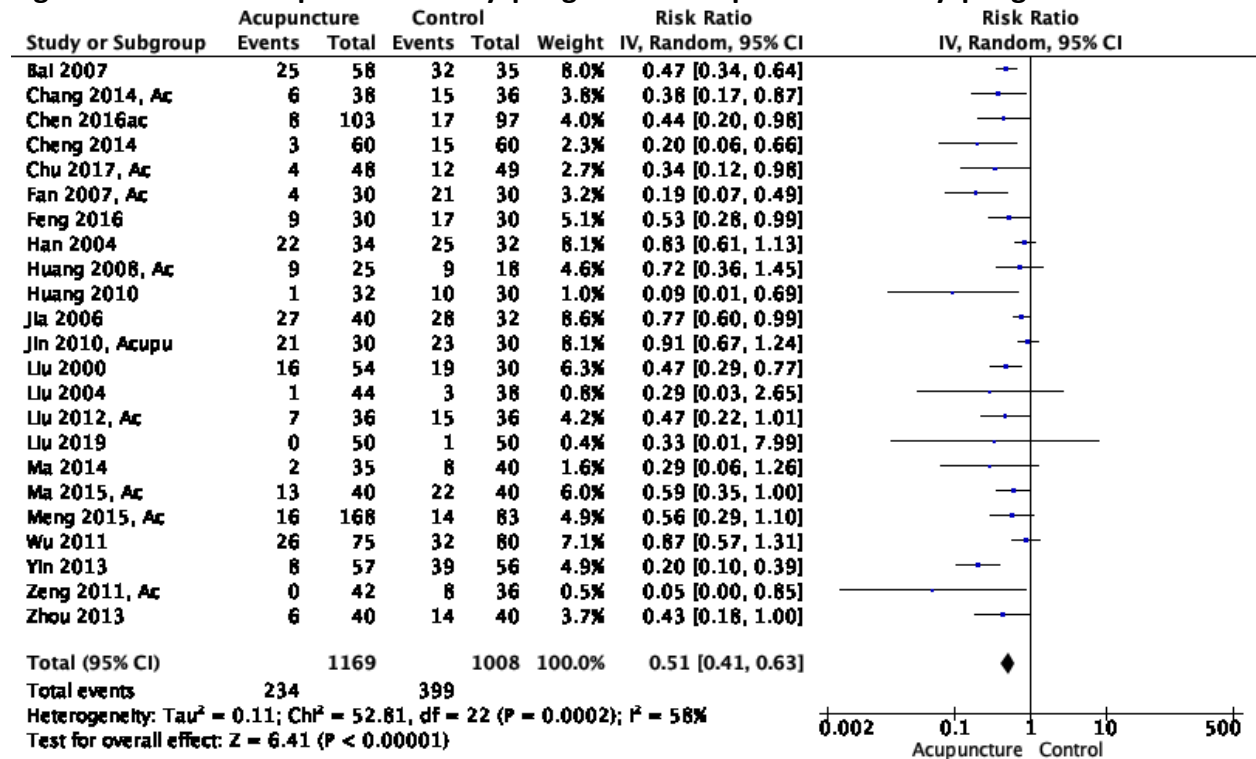

Figure 2: Effect of acupuncture on overall change in dysphagia score in patients with dysphagia with stroke

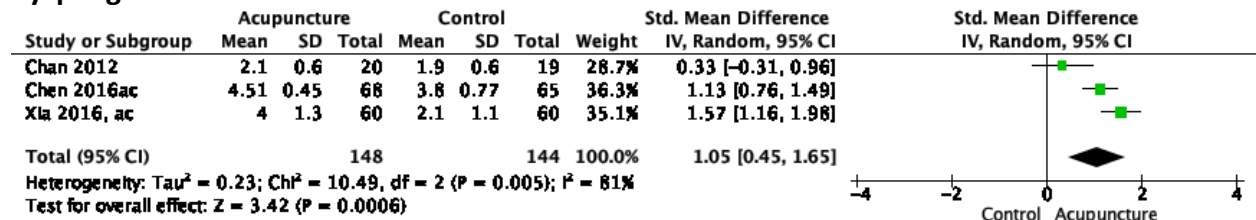

Figure 3: Effect of acupuncture on overall dysphagia score in patients with dysphagia with stroke

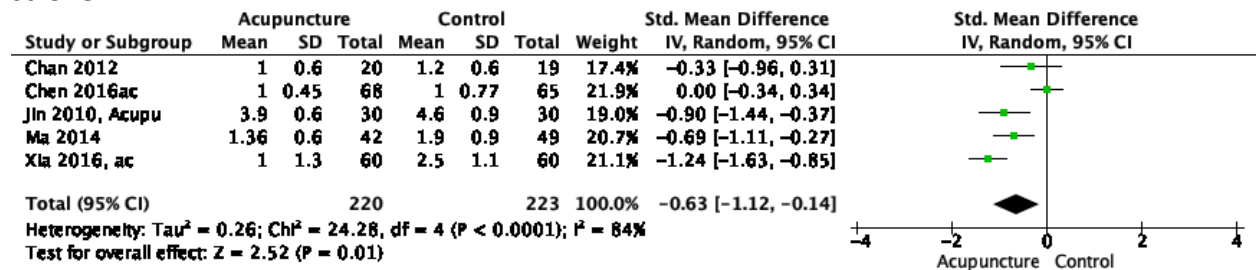

Figure 4: Effect of acupuncture on DOSS in patients with dysphagia with stroke

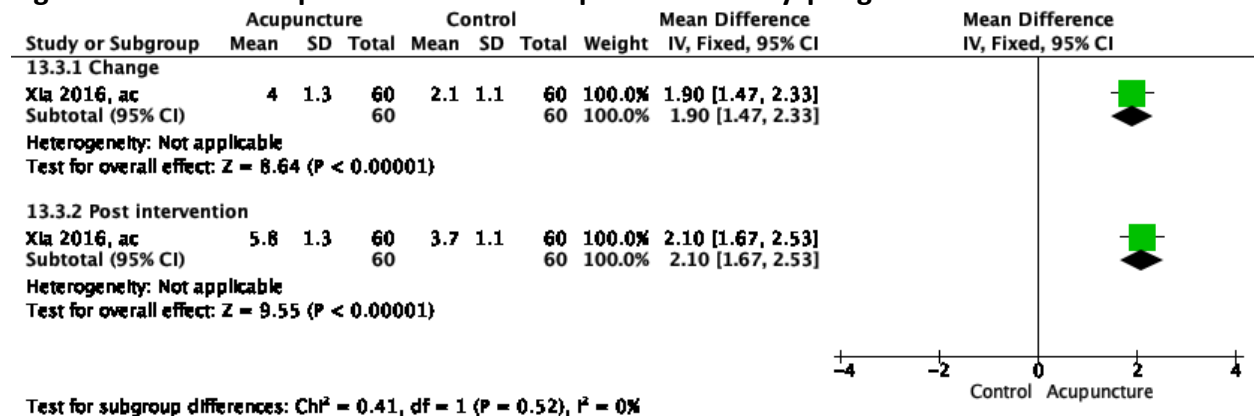

Figure 5: Effect of acupuncture on VFSS in patients with dysphagia with stroke

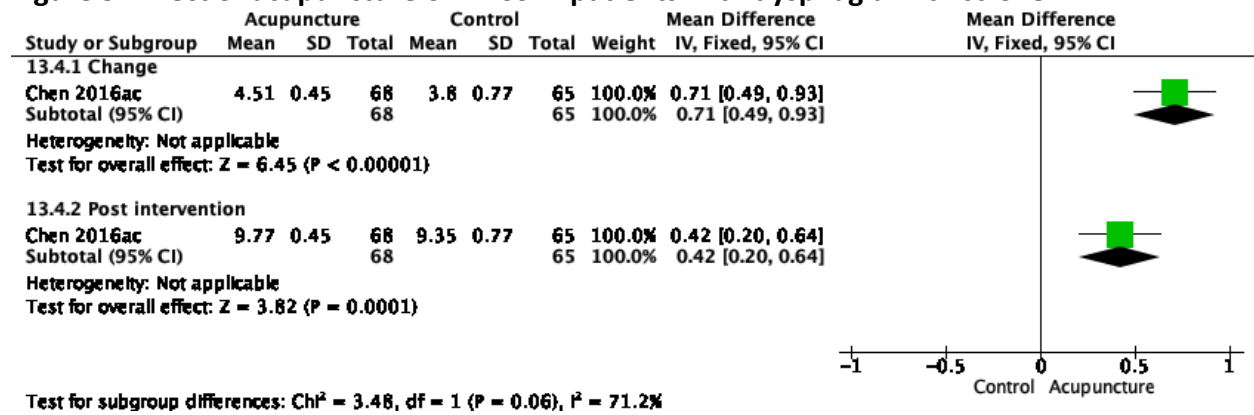

Figure 6: Effect of acupuncture on RBHOMS in patients with dysphagia with stroke

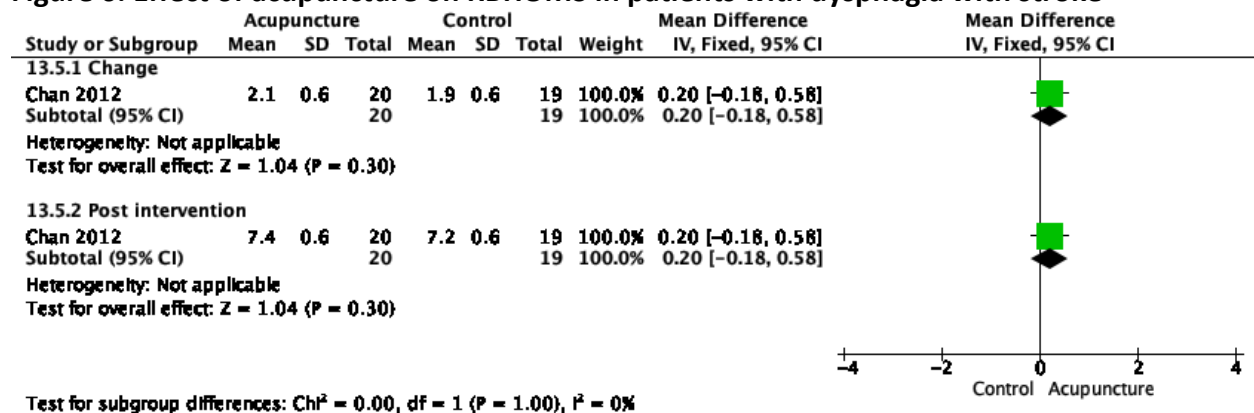

Figure 7: Effect of acupuncture on water swallow test in patients with dysphagia with stroke

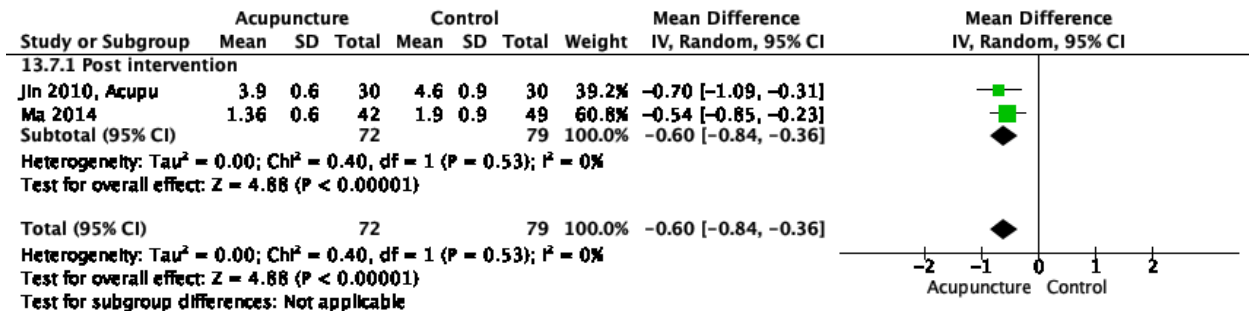

Figure 8: Effect of acupuncture on latent time in swallowing reflux in patients with dysphagia with stroke

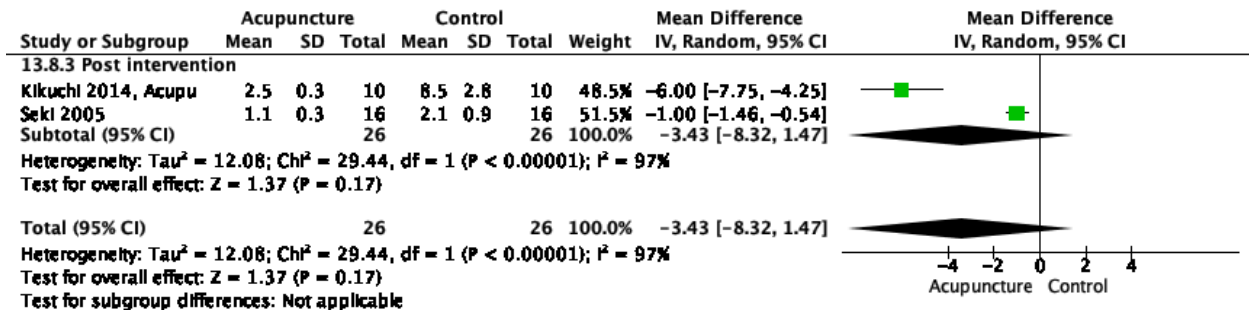

**Table 2: Effect of acupuncture on dysphagia in patients with dysphagia after stroke**

| Outcome                    | Mean±SD/ Incidence (%) |           | n (N)  | MD/OR [95% CI]       | I <sup>2</sup> | P value  |
|----------------------------|------------------------|-----------|--------|----------------------|----------------|----------|
|                            | Acupuncture            | Control   |        |                      |                |          |
| Pneumonia                  | 3.3%                   | 8.3%      | 1(120) | 0.40 [0.08, 1.98]    | NA             | 0.26     |
| SQoL                       | 197±19                 | 165±20    | 1(120) | 32.0 [24.99, 39.01]  | NA             | <0.00001 |
| MMSE                       | 8.3±2.9                | 6.1±2.9   | 1(20)  | 2.20 [-0.34, 4.74]   | NA             | 0.09     |
| Nasal feeding tube removal | 89.5%                  | 50.0%     | 1(74)  | 1.79 [1.27, 2.53]    | NA             | 0.0009   |
| BI                         | 78±11                  | 63±12     | 2(140) | 7.40 [-12.39, 27.19] | 95%            | 0.46     |
| FMA                        |                        |           |        |                      |                |          |
| • Change                   | 18.2±14.2              | 16.6±16.5 | 1(241) | 1.61 [-2.27, 5.49]   | NA             | 0.42     |
| • Post intervention        | 64.4±14.2              | 66.9±16.5 | 1(241) | -2.44 [-6.32, 1.44]  | NA             | 0.22     |
| Adverse effects            |                        |           |        |                      |                |          |
| • Pain                     | 1.7%                   | 0.0%      | 1(120) | 3.00 [0.12, 72.20]   | NA             | 0.5      |
| • Hematoma                 | 3.3%                   | 0.0%      | 1(120) | 5.00 [0.25, 102.00]  | NA             | 0.3      |
| • Discomfort               | 11.7%                  | 8.3%      | 1(120) | 1.40 [0.47, 4.17]    | NA             | 0.55     |

CI: Confidence intervals; FMA: Fugl-Meyer Assessment; I<sup>2</sup>: Heterogeneity; MMSE: Mini Mental State Examination; n: Number of studies; N: Number of patients; NA: Not applicable; p: Statistical significance value; SD: Standard Deviation; MD: Mean Difference; SQoL: Swallowing quality of life

**Figure 9: Effect of acupuncture on pneumonia in patients with dysphagia with stroke**

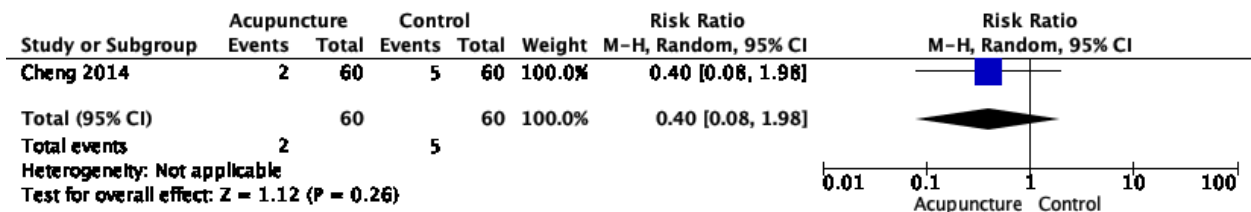

**Figure 10: Effect of acupuncture on swallowing quality of life in patients with dysphagia with stroke**

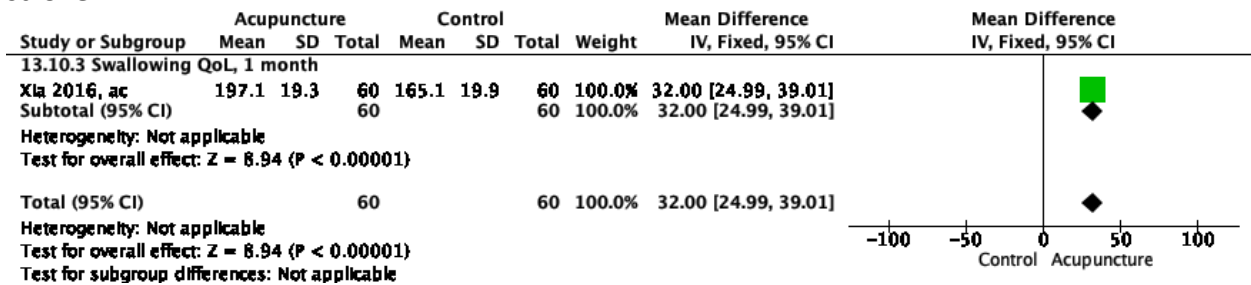

**Figure 11: Effect of acupuncture on Mini-Mental State Examination in patients with dysphagia with stroke**

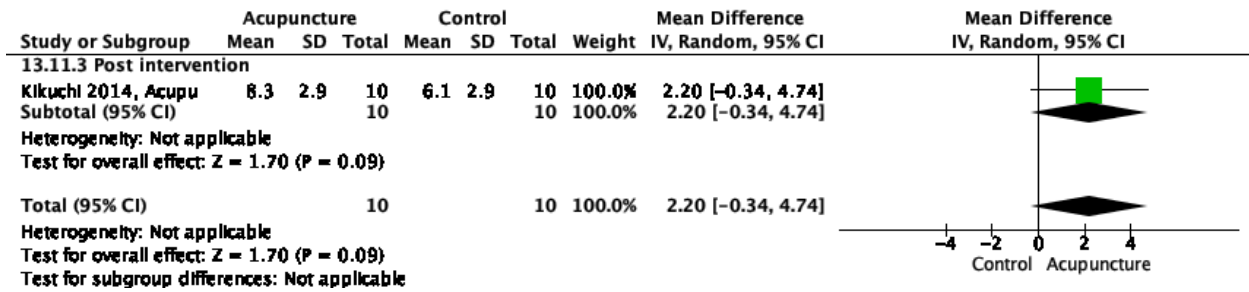

Figure 12: Effect of acupuncture on Nasal Feeding Tube Removal in patients with dysphagia with stroke

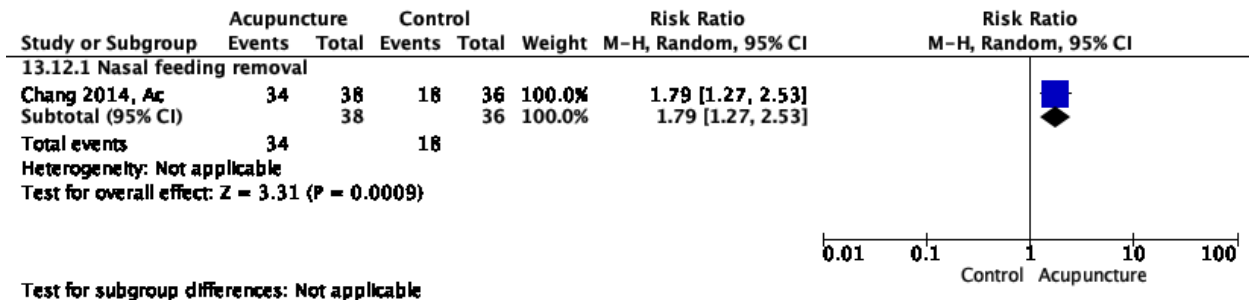

Figure 13: Effect of acupuncture on BI in patients with dysphagia with stroke

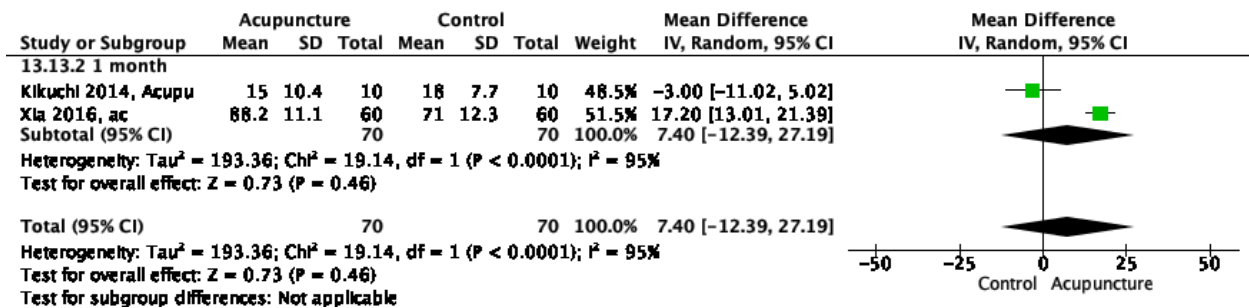

Figure 14: Effect of acupuncture on FM Assessment in patients with dysphagia with stroke

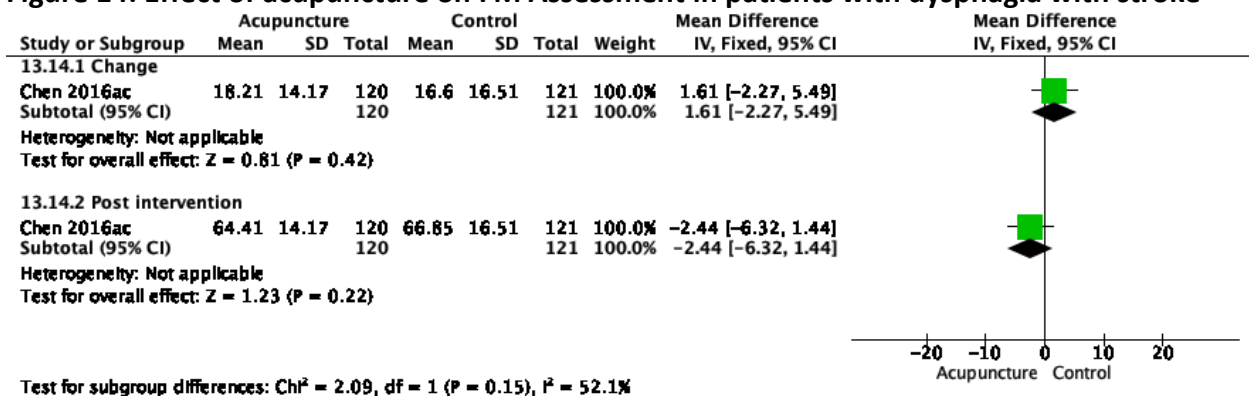



Figure 14: Effect of acupuncture on adverse effects in patients with dysphagia with stroke

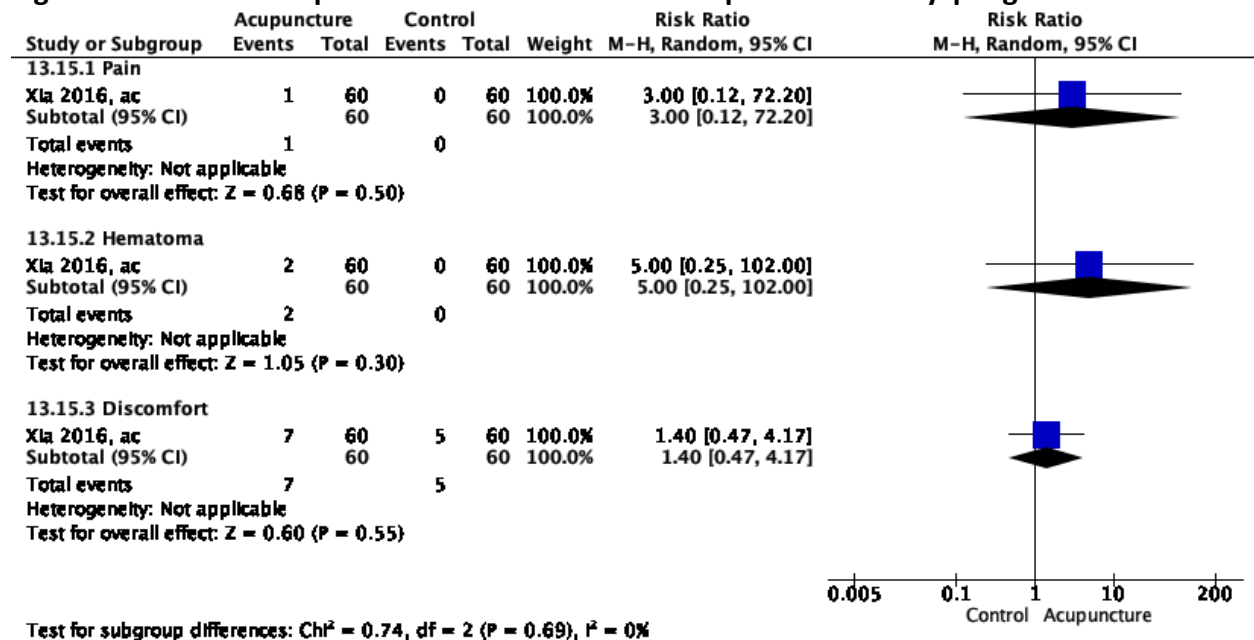

Treatment 3 – Nutritional Therapy

Table 1: Effect of early compared to late initiation of oral nutrition therapy on mortality and pneumonia in patients with post-stroke dysphagia

| Outcome          | Incidence (%)   |                | n (N)   | RR [95% CI]       | I <sup>2</sup> | P value |
|------------------|-----------------|----------------|---------|-------------------|----------------|---------|
|                  | Early nutrition | Late nutrition |         |                   |                |         |
| <b>Mortality</b> |                 |                |         |                   |                |         |
| • RCT            | 11.7%           | 12.6%          | 4(4337) | 0.88 [0.57, 1.37] | 26%            | 0.57    |
| <b>Pneumonia</b> |                 |                |         |                   |                |         |
| • RCT            | 6.4%            | 5.8%           | 1(4023) | 1.12 [0.88, 1.42] | NA             | 0.38    |

CI: Confidence intervals; I<sup>2</sup>, p: Heterogeneity; n: Number of studies; N: Number of patients; NA: Not applicable; p: Statistical significance value; RR: Risk Ratio

Figure 1: Effect of early compared to late initiation of nutrition therapy on mortality in patients with post-stroke dysphagia

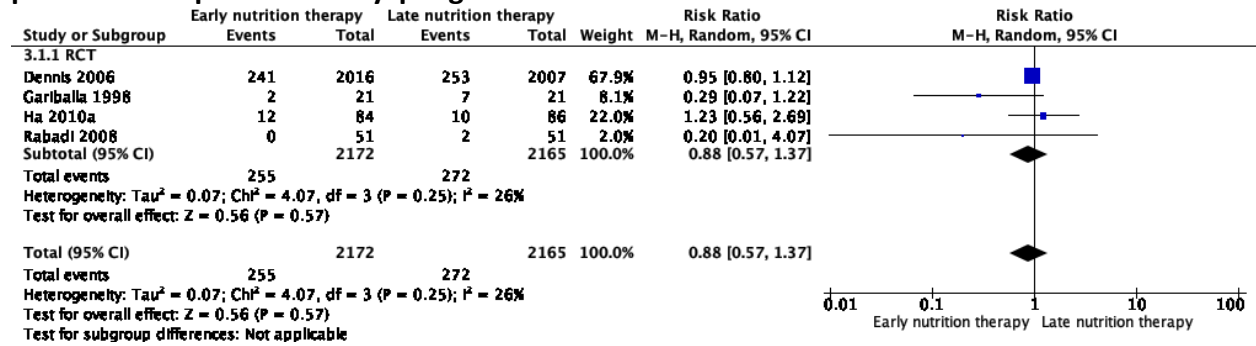

Figure 2: Effect of early compared to late initiation of nutrition therapy on pneumonia in patients with post-stroke dysphagia

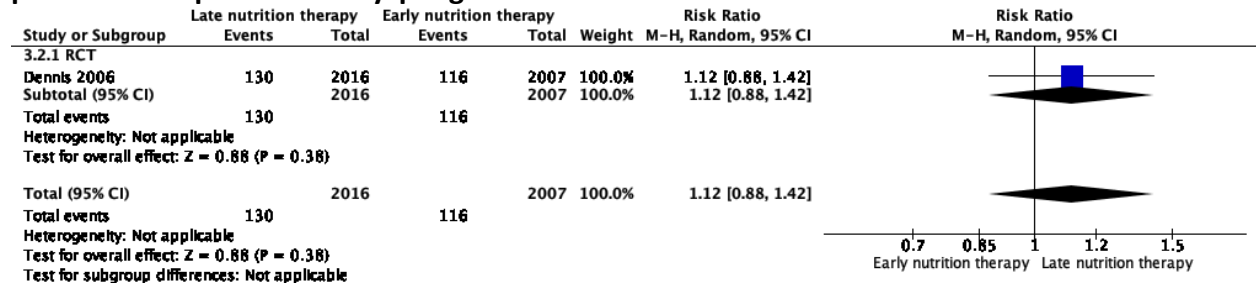

**Table 2: Effect of early compared to late initiation of oral nutrition therapy on mRS and swallowing in patients with post-stroke dysphagia**

| Outcome                 | Incidence (%)   |                | n (N)   | RR [95% CI]       | I <sup>2</sup> | P value |
|-------------------------|-----------------|----------------|---------|-------------------|----------------|---------|
|                         | Early nutrition | Late nutrition |         |                   |                |         |
| <b>MRS, RCT</b>         |                 |                |         |                   |                |         |
| • mRS, 0, 1             | 23.4%           | 23.5%          | 1(4023) | 1.00 [0.89, 1.11] | NA             | 0.94    |
| • mRS, 0-2              | 40.4%           | 41.1%          | 1(4023) | 0.98 [0.91, 1.06] | NA             | 0.68    |
| <b>Complications</b>    |                 |                |         |                   |                |         |
| <b>Recurrent stroke</b> |                 |                |         |                   |                |         |
| • RCT                   | 2.5%            | 2.1%           | 1(4023) | 1.16 [0.77, 1.73] | NA             | 0.48    |
| <b>Infections</b>       |                 |                |         |                   |                |         |
| • RCT                   | 8.5%            | 10.0%          | 1(4023) | 0.86 [0.71, 1.04] | NA             | 0.12    |
| <b>Pressure sores</b>   |                 |                |         |                   |                |         |
| • RCT                   | 0.7%            | 1.3%           | 1(4023) | 0.57 [0.31, 1.08] | NA             | 0.09    |
| <b>GIT hemorrhage</b>   |                 |                |         |                   |                |         |
| • RCT                   | 1.4%            | 0.9%           | 1(4023) | 1.55 [0.86, 2.79] | NA             | 0.15    |

CI: Confidence intervals; GIT: Gastrointestinal; I<sup>2</sup>: Heterogeneity; n: Number of studies; N: Number of patients; NA: Not applicable; p: Statistical significance value; RR: Risk Ratio

**Figure 3: Effect of early compared to late initiation of nutrition therapy on mRS in patients with post-stroke dysphagia**

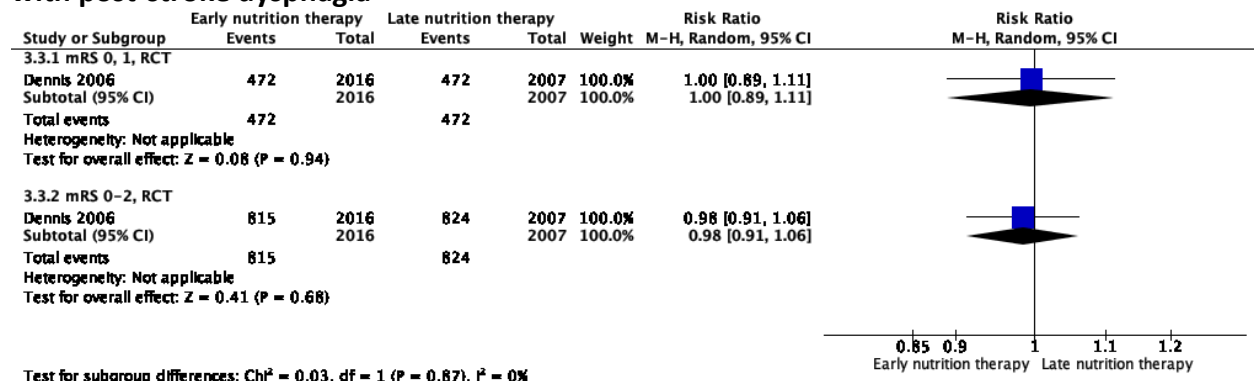

**Figure 4: Effect of early compared to late initiation of oral nutrition therapy on complications in patients with post-stroke dysphagia**

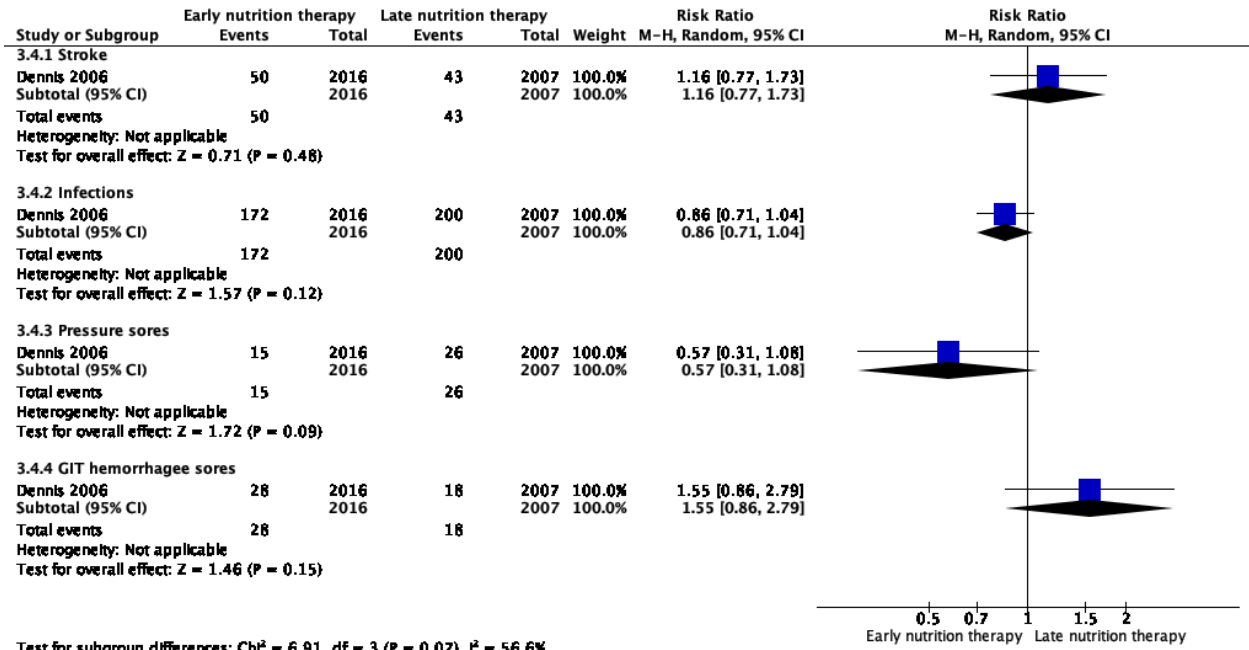

**Table 3: Effect of early compared to late initiation of oral nutrition therapy on length of stay, living and tubing in patients with post-stroke dysphagia**

| Outcome                      | Incidence (%)/<br>Mean±SD |                   | n (N)   | RR [95% CI]/<br>MD [95% CI] | I <sup>2</sup> | P value |
|------------------------------|---------------------------|-------------------|---------|-----------------------------|----------------|---------|
|                              | Early<br>nutrition        | Late<br>nutrition |         |                             |                |         |
| <b>Length of stay, days</b>  |                           |                   |         |                             |                |         |
| • RCT                        | 31.1±46.5                 | 31.4±43.2         | 4(4289) | 0.93 [-1.05, 2.91]          | 0%             | 0.36    |
| <b>BI</b>                    |                           |                   |         |                             |                |         |
| • RCT                        | 45±25                     | 35±30             | 1(40)   | 10.00 [-7.11, 27.11]        | NA             | 0.25    |
| <b>Living at home</b>        |                           |                   |         |                             |                |         |
| • RCT                        | 20.2%                     | 18.4%             | 3(4165) | 1.20 [0.95, 1.52]           | 38%            | 0.13    |
| <b>Living in institution</b> |                           |                   |         |                             |                |         |
| • RCT                        | 6.7%                      | 7.0%              | 2(4063) | 0.96 [0.77, 1.21]           | 0%             | 0.73    |

CI: Confidence intervals; I<sup>2</sup>, p: Heterogeneity; MD: Mean difference; n: Number of studies; N: Number of patients; NA: Not applicable; p: Statistical significance value; RR: Risk Ratio; SD: Standard deviation

**Figure 5: Effect of early compared to late initiation of nutrition therapy on length of stay in hospital in patients with post-stroke dysphagia**

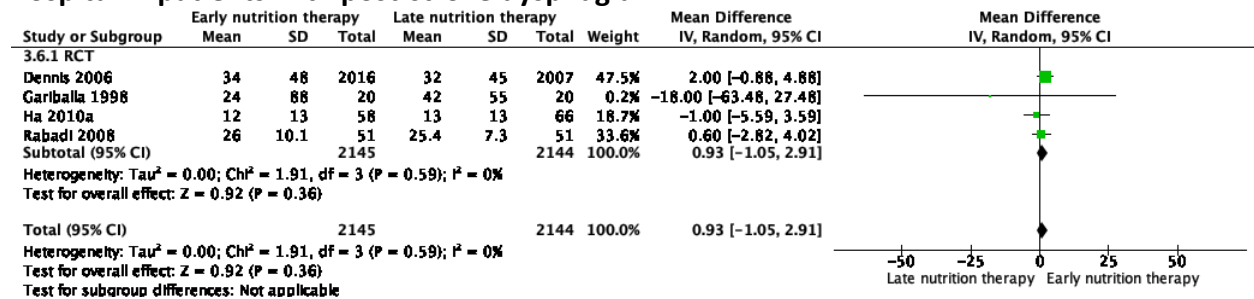

**Figure 6: Effect of early compared to late initiation of nutrition therapy on activities of daily living Barthel index (ADLBI) in patients with post-stroke dysphagia**

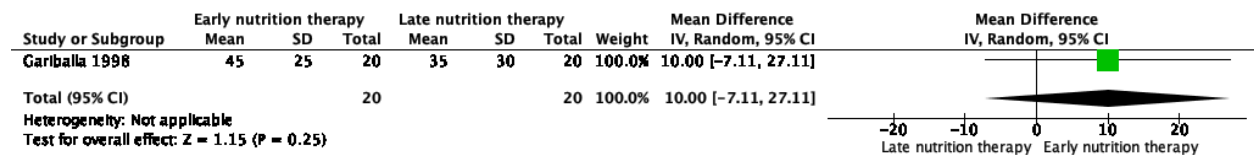

**Figure 7: Effect of early compared to late initiation of nutrition therapy on home or institution living in patients with post-stroke dysphagia**

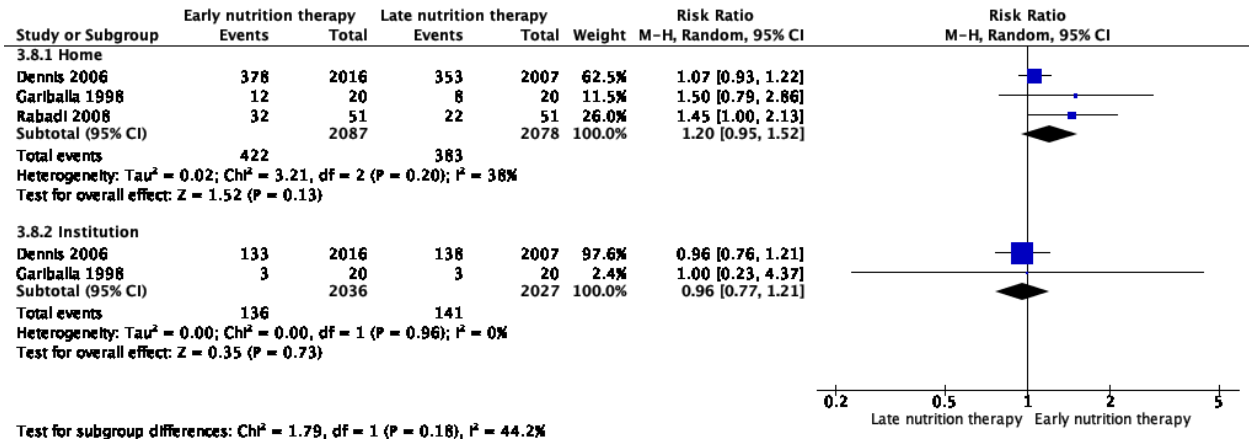

**Table 4: Effect of early compared to late initiation of oral nutrition therapy on change in weight functional independence score, hand grip strength, energy and protein intake, energy and protein intake in patients with post-stroke dysphagia**

| Outcome                                        | Incidence (%)/<br>Mean±SD |                   | n (N)  | RR [95% CI]/<br>MD [95% CI] | I <sup>2</sup> | P value      |
|------------------------------------------------|---------------------------|-------------------|--------|-----------------------------|----------------|--------------|
|                                                | Early<br>nutrition        | Late<br>nutrition |        |                             |                |              |
| <b>Weight, change, kg</b>                      |                           |                   |        |                             |                |              |
| • RCT                                          | 0.0±1.7                   | -1.1±2.1          | 4(315) | 1.03 [0.17, 1.89]           | 91%            | 0.02         |
| <b>Arm circumference</b>                       |                           |                   |        |                             |                |              |
| RCT                                            | -0.3±2.1                  | -0.3±2.9          | 1(36)  | 0.00 [-1.65, 1.65]          | NA             | 1.00         |
| <b>Triceps skin fold thickness</b>             |                           |                   |        |                             |                |              |
| RCT                                            | -0.9±1.7                  | -0.6±1.8          | 1(36)  | -0.30 [-1.44, 0.84]         | NA             | 0.61         |
| <b>Functional independence measure, change</b> |                           |                   |        |                             |                |              |
| • RCT                                          | 31.5±14.3                 | 22.9±11.8         | 1(102) | 8.60 [3.51, 13.69]          | NA             | 0.0009       |
| <b>Handgrip strength, change</b>               |                           |                   |        |                             |                |              |
| • RCT                                          | 2.3±3.7                   | -0.3±4.9          | 1(121) | 2.60 [1.06, 4.14]           | NA             | 0.00009      |
| <b>Mini Mental State Examination</b>           |                           |                   |        |                             |                |              |
| • RCT                                          | 3.9±3.3                   | 0.6±1.2           | 1(48)  | 3.30 [1.90, 4.70]           | NA             | <<br>0.00001 |
| <b>Energy, kj/kg</b>                           |                           |                   |        |                             |                |              |
| • RCT                                          | 61.6±20.8                 | 49.7±15.0         | 5(264) | 8.25 [1.97, 14.53]          | 81%            | 0.01         |
| <b>Protein intake, g/kg</b>                    |                           |                   |        |                             |                |              |
| • RCT                                          | 0.9±0.3                   | 0.7±0.3           | 5(264) | 0.21 [0.01, 0.41]           | 88%            | 0.04         |

CI: Confidence intervals; I<sup>2</sup>, p: Heterogeneity; MD: Mean difference; n: Number of studies; N: Number of patients; NA: Not applicable; p: Statistical significance value; RR: Risk Ratio; SD: Standard deviation

Figure 8: Effect of early compared to late initiation of nutrition therapy on change in weight functional independence score and hand grip strength in patients with post-stroke dysphagia

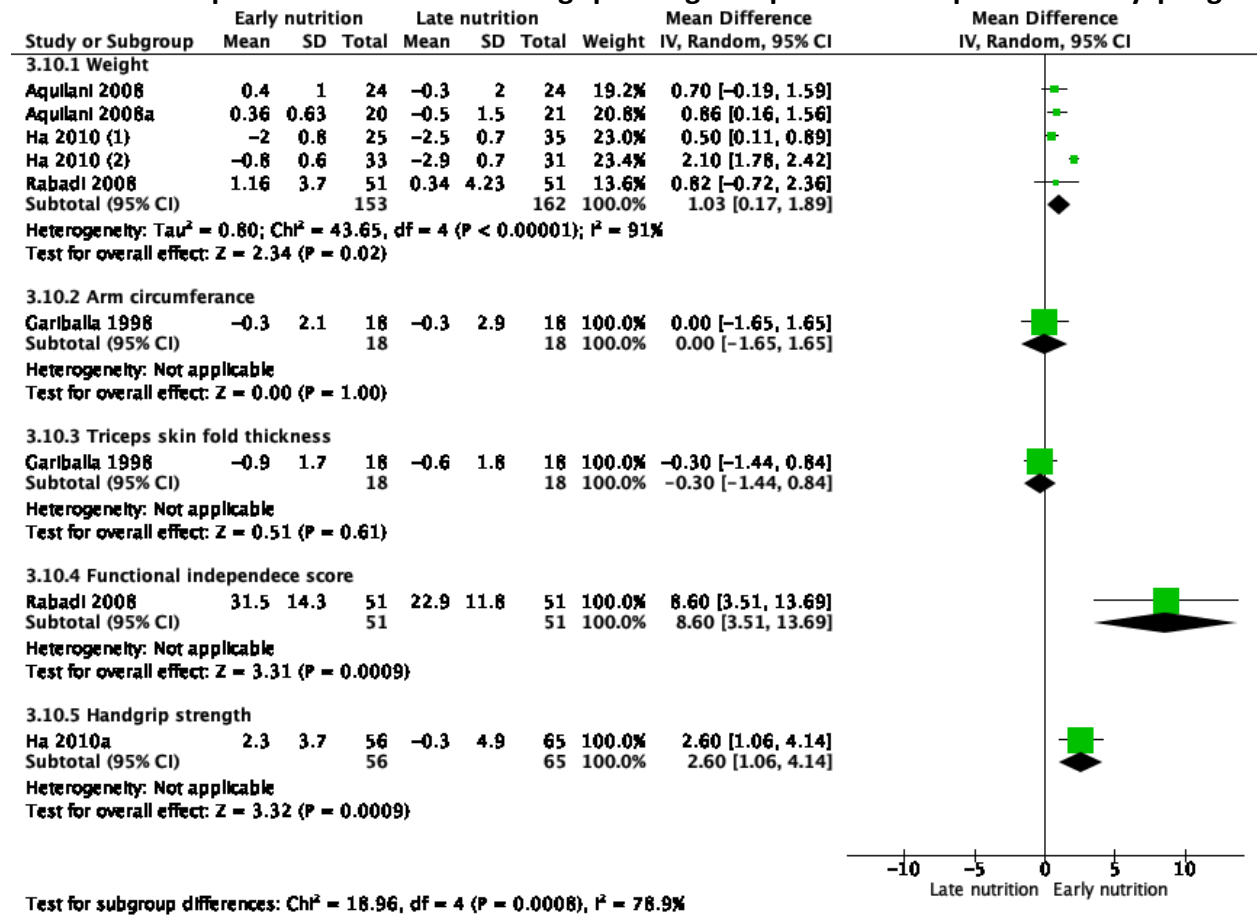

Footnotes

- (1) Male
- (2) Female

Figure 9: Effect of early compared to late initiation of nutrition therapy on Mini-mental state examination in patients with post-stroke dysphagia

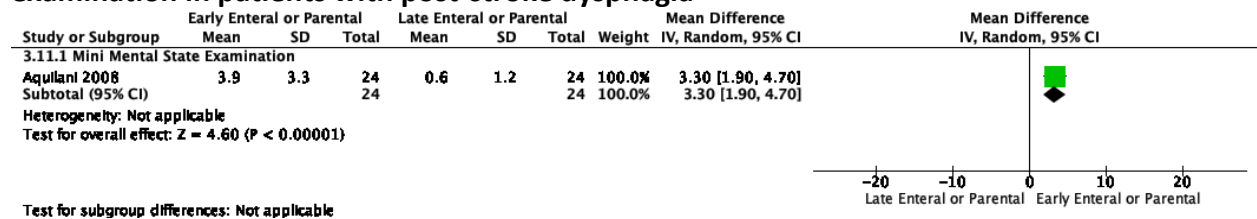



**Figure 10: Effect of early compared to late initiation of nutrition therapy on energy and protein intake in patients with post-stroke dysphagia**

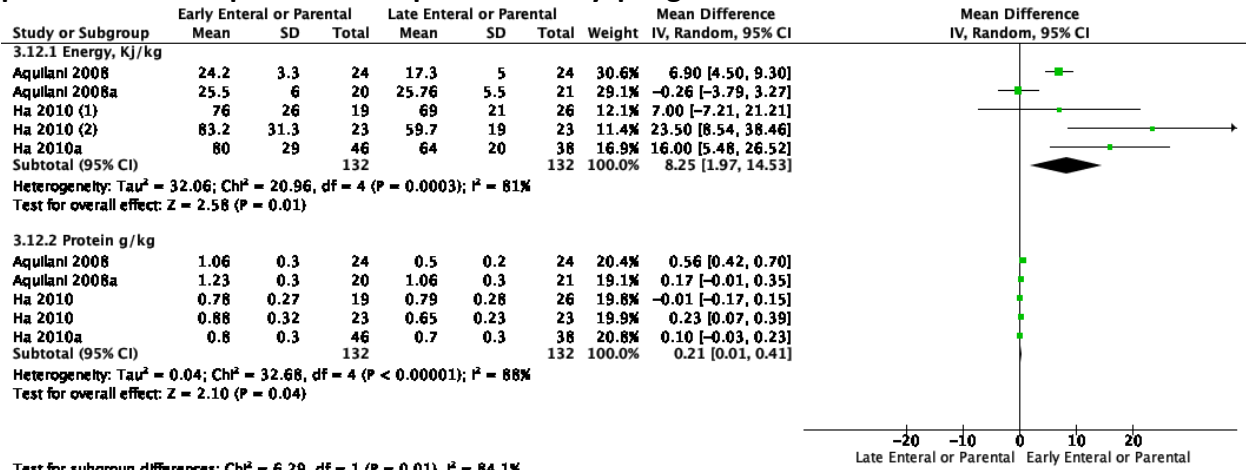

**Table 1: Effect of early compared to late or restrictive enteral or parenteral nutrition therapy on mortality and pneumonia in patients with post-stroke dysphagia**

| Outcome          | Incidence (%)               |                                         | n (N)   | RR [95% CI]       | I <sup>2</sup> | P value |
|------------------|-----------------------------|-----------------------------------------|---------|-------------------|----------------|---------|
|                  | Early Enteral or Parenteral | Late/ Restrictive Enteral or Parenteral |         |                   |                |         |
| <b>Mortality</b> |                             |                                         |         |                   |                |         |
| • RCT            | 42.4%                       | 48.1%                                   | 1(859)  | 0.88 [0.76, 1.02] | NA             | 0.09    |
| <b>Pneumonia</b> |                             |                                         |         |                   |                |         |
| • NRCT           | 28.4%                       | 29.5%                                   | 2(1005) | 0.97 [0.80, 1.17] | 0%             | 0.75    |

CI: Confidence intervals; I<sup>2</sup>, p: Heterogeneity; n: Number of studies; N: Number of patients; NA: Not applicable; p: Statistical significance value; RR: Risk Ratio

**Figure 1: Effect of early compared to late or restrictive enteral or parenteral nutrition therapy on mortality in patients with post-stroke dysphagia**

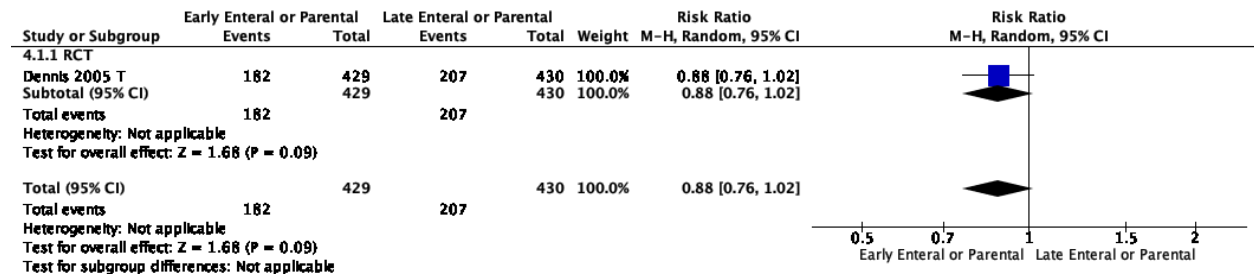

**Figure 2: Effect of early compared to late or restrictive enteral or parenteral nutrition therapy on pneumonia in patients with post-stroke dysphagia**

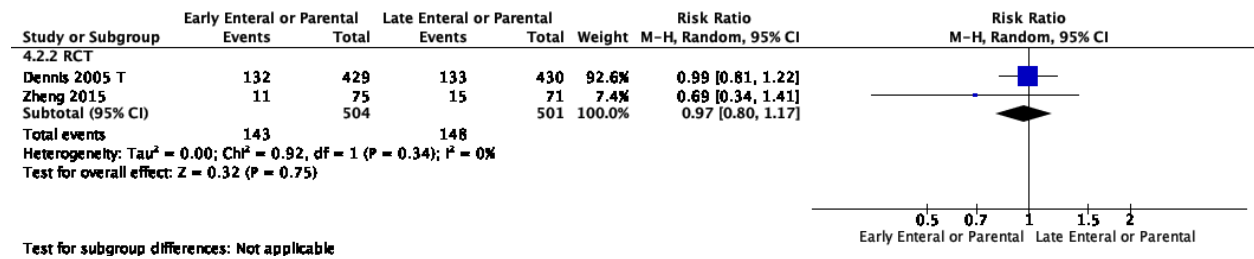

**Table 2: Effect of early compared to late or restrictive enteral or parenteral nutrition therapy on mRS in patients with post-stroke dysphagia**

| Outcome                 | Incidence (%)               |                                         | n (N)   | RR [95% CI]       | I <sup>2</sup> | P value |
|-------------------------|-----------------------------|-----------------------------------------|---------|-------------------|----------------|---------|
|                         | Early Enteral or Parenteral | Late/ Restrictive Enteral or Parenteral |         |                   |                |         |
| <b>MRS</b>              |                             |                                         |         |                   |                |         |
| <b>mRS, 0, 1</b>        | 5.7%                        | 7.0%                                    | 2(981)  | 0.84 [0.36, 1.94] | 65%            | 0.68    |
| • RCT                   |                             |                                         |         |                   |                |         |
| <b>mRS, 0-2</b>         | 9.3%                        | 10.2%                                   | 1(859)  | 0.91 [0.61, 1.37] | NA             | 0.65    |
| • RCT                   |                             |                                         |         |                   |                |         |
| <b>Complications</b>    |                             |                                         |         |                   |                |         |
| <b>Recurrent stroke</b> |                             |                                         |         |                   |                |         |
| • RCT                   | 3.5%                        | 5.3%                                    | 1(859)  | 0.65 [0.35, 1.24] | NA             | 0.19    |
| <b>Infections</b>       |                             |                                         |         |                   |                |         |
| • RCT                   | 23.8%                       | 27.3%                                   | 2(1005) | 0.80 [0.55, 1.18] | 65%            | 0.27    |
| <b>Pressure sores</b>   |                             |                                         |         |                   |                |         |
| • RCT                   | 2.8%                        | 2.3%                                    | 1(859)  | 1.20 [0.53, 2.75] | NA             | 0.66    |
| <b>Malnutrition</b>     |                             |                                         |         |                   |                |         |
| • RCT                   | 27.1%                       | 48.3%                                   | 1(128)  | 0.56 [0.35, 0.90] | NA             | 0.02    |
| <b>GIT hemorrhage</b>   |                             |                                         |         |                   |                |         |
| • RCT                   | 5.1%                        | 2.6%                                    | 1(859)  | 2.00 [0.98, 4.08] | NA             | 0.06    |

CI: Confidence intervals; GIT: Gastrointestinal; I<sup>2</sup>, p: Heterogeneity; n: Number of studies; N: Number of patients; NA: Not applicable; p: Statistical significance value; RR: Risk Ratio

**Figure 3: Effect of early compared to late or restrictive enteral or parenteral nutrition therapy on mRS in patients with post-stroke dysphagia**

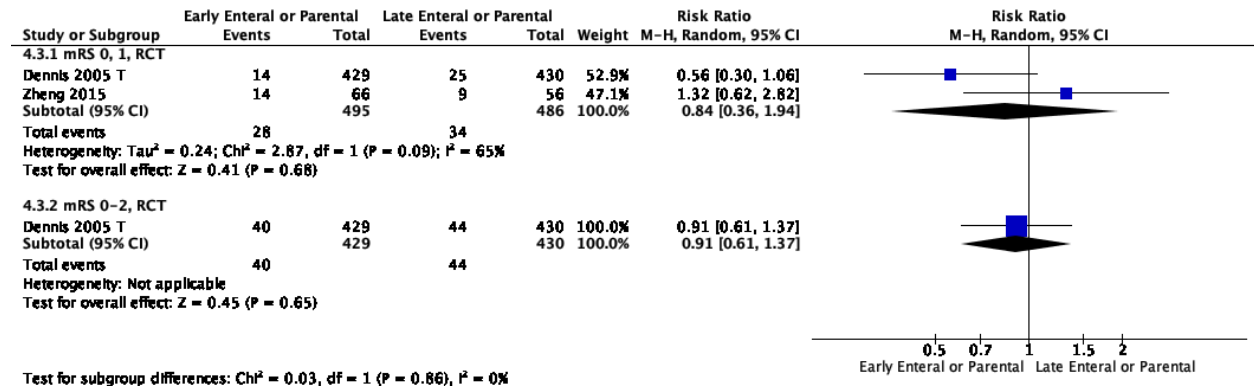

**Figure 4: Effect of early compared to late or restrictive enteral or parenteral nutrition therapy on complication in patients with post-stroke dysphagia**

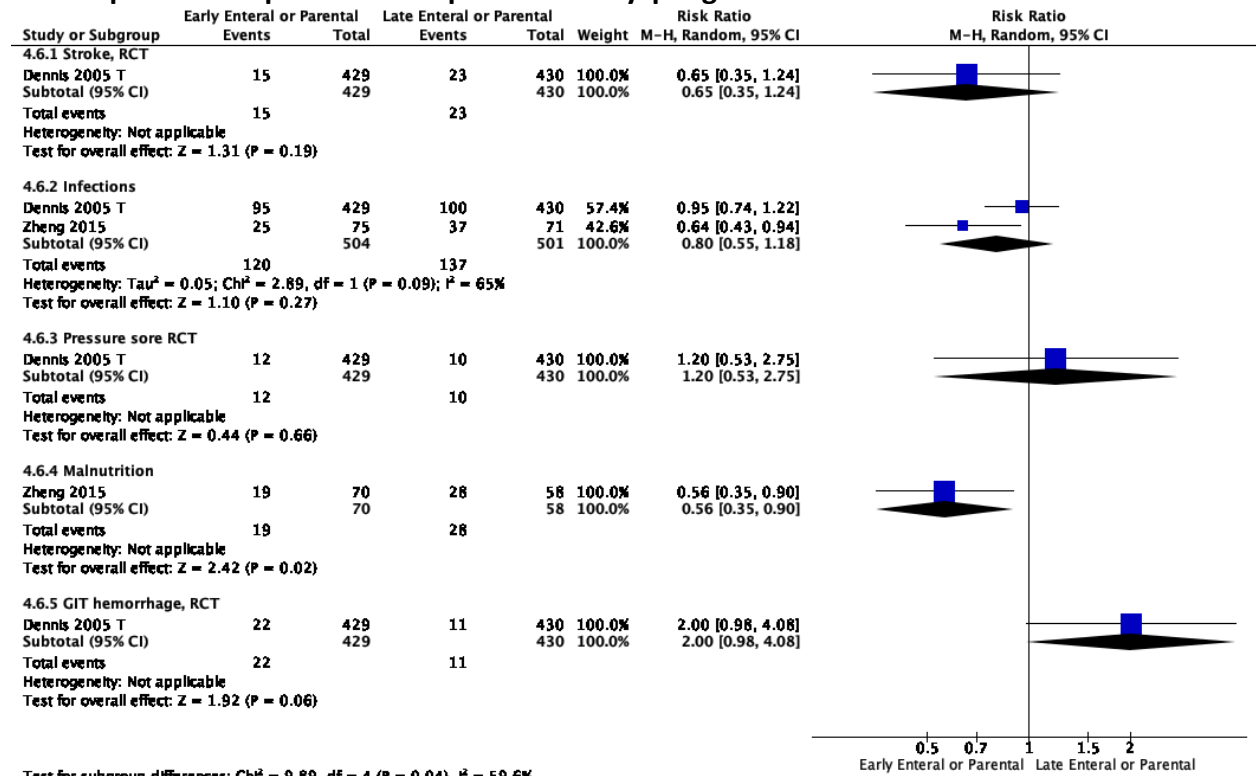

**Table 3: Effect of early compared to late or restrictive enteral or parenteral nutrition therapy on length of stay, living and tubing and Quality of life in patients with post-stroke dysphagia**

| Outcome                                          | Incidence (%)/<br>Mean±SD         |                                                  | n (N)  | RR [95% CI]/<br>MD [95% CI] | I <sup>2</sup> | P value |
|--------------------------------------------------|-----------------------------------|--------------------------------------------------|--------|-----------------------------|----------------|---------|
|                                                  | Early<br>Enteral or<br>Parenteral | Late/<br>Restrictive<br>Enteral or<br>Parenteral |        |                             |                |         |
| <b>Length of stay, days</b>                      |                                   |                                                  |        |                             |                |         |
| • RCT                                            | 45±58                             | 44±50                                            | 1(859) | 1.00 [-6.24, 8.24]          | NA             | 0.79    |
| <b>BI</b>                                        |                                   |                                                  |        |                             |                |         |
| • RCT                                            | 46.7±8.8                          | 44.4±9.3                                         | 1(146) | 2.30 [-0.64, 5.24]          | NA             | 0.13    |
| <b>Living at home</b>                            |                                   |                                                  |        |                             |                |         |
| • RCT                                            | 35.7%                             | 31.6%                                            | 1(859) | 1.13 [0.93, 1.36]           | NA             | 0.21    |
| <b>Living in Rehabilitation/<br/>institution</b> |                                   |                                                  |        |                             |                |         |
| • RCT                                            | 21.9%                             | 20.0%                                            | 1(859) | 1.10 [0.84, 1.42]           | NA             | 0.49    |
| <b>Nasogastric tube</b>                          |                                   |                                                  |        |                             |                |         |
| • RCT                                            | 7.0%                              | 5.3%                                             | 1(859) | 1.31 [0.77, 2.21]           | NA             | 0.32    |
| <b>PEG</b>                                       |                                   |                                                  |        |                             |                |         |
| • RCT                                            | 3.3%                              | 2.3%                                             | 1(859) | 1.40 [0.63, 3.12]           | NA             | 0.41    |
| • <b>Quality of life</b>                         |                                   |                                                  |        |                             |                |         |
| • <b>Utilities</b>                               |                                   |                                                  |        |                             |                |         |
| • RCT (Dennis 2005 T)                            | NR                                | NR                                               | 1(859) | 0.013                       | NA             | 0.76    |

CI: Confidence intervals; I<sup>2</sup>, p: Heterogeneity; MD: Mean difference; n: Number of studies; N: Number of patients; NA: Not applicable; p: Statistical significance value; RR: Risk Ratio; SD: Standard deviation

**Figure 5: Effect of early compared to late or restrictive enteral or parenteral nutrition therapy on length of stay in patients with post-stroke dysphagia**

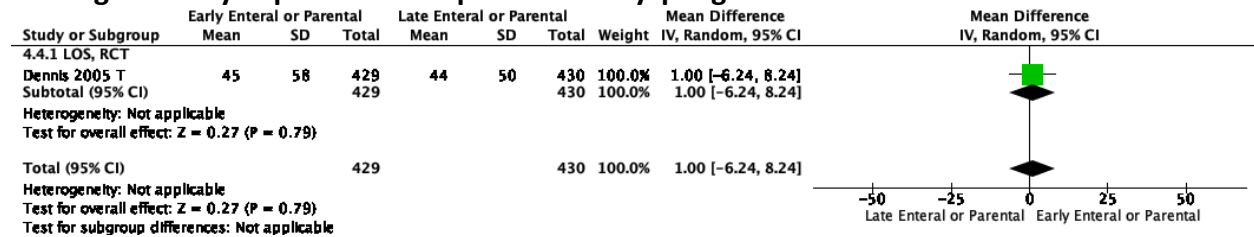

**Figure 6: Effect of early compared to late or restrictive enteral or parenteral nutrition therapy on activities of daily living Barthel index (ADLBI) in patients with post-stroke dysphagia**

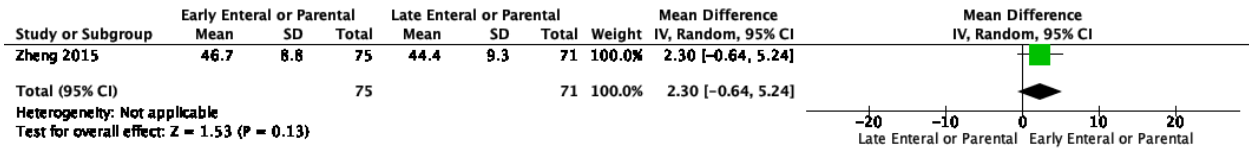

**Figure 7: Effect of early compared to late or restrictive enteral or parenteral nutrition therapy on living or discharge in patients with post-stroke dysphagia**

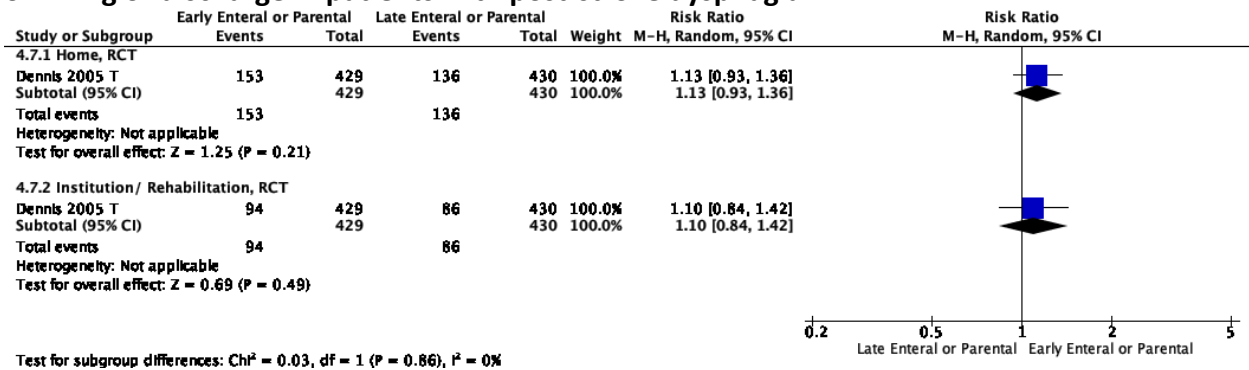

**Figure 8: Effect of early compared to late or restrictive enteral or parenteral nutrition therapy on tubing in patients with post-stroke dysphagia**

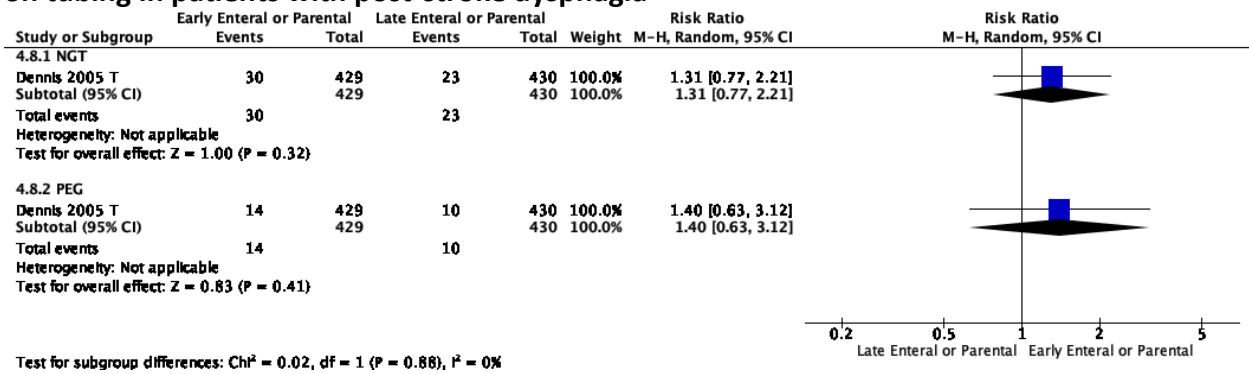

## Treatment 4 – Oral Health Interventions

Table 1: Effect of oral health on mortality in patients with dysphagia after stroke

| Outcome            | Incidence % |         | n (N)  | OR [95% CI]       | I <sup>2</sup> | P value     |
|--------------------|-------------|---------|--------|-------------------|----------------|-------------|
|                    | Oral health | Control |        |                   |                |             |
| <b>Mortality</b>   |             |         |        |                   |                |             |
| • Overall          | 17.4%       | 29.8%   | 3(349) | 0.66 [0.45, 0.96] | 0%             | <b>0.03</b> |
| • RCT              | 8.7%        | 14.0%   | 1(203) | 0.62 [0.28, 1.38] | NA             | 0.24        |
| • NRCT             | 32.8%       | 47.7%   | 2(146) | 0.67 [0.44, 1.03] | 0%             | 0.07        |
| <b>In-patients</b> |             |         |        |                   |                |             |
| • RCT              | 8.7%        | 11.0%   | 1(203) | 0.79 [0.34, 1.83] | NA             | 0.59        |
| <b>1 month</b>     |             |         |        |                   |                |             |
| • RCT              | NR          | NR      | NR     | NR                | NR             | NR          |
| • NRCT             | 12.1%       | 25.0%   | 2(146) | 0.48 [0.22, 1.05] | 0%             | 0.07        |
| <b>3 months</b>    |             |         |        |                   |                |             |
| • RCT              | 8.7%        | 14.0%   | 1(203) | 0.62 [0.28, 1.38] | NA             | 0.24        |
| <b>6 months</b>    |             |         |        |                   |                |             |
| • RCT              | NR          | NR      | NR     | NR                | NR             | NR          |
| • NRCT             | 32.8%       | 47.7%   | 2(146) | 0.67 [0.44, 1.03] | 0%             | 0.07        |

CI: Confidence intervals; I<sup>2</sup>: Heterogeneity; n: Number of studies; N: Number of patients; NR: Not reported; p: Statistical significance value; OR: Odds ratio

Figure 1: Effect of oral health on mortality in patients with dysphagia after stroke

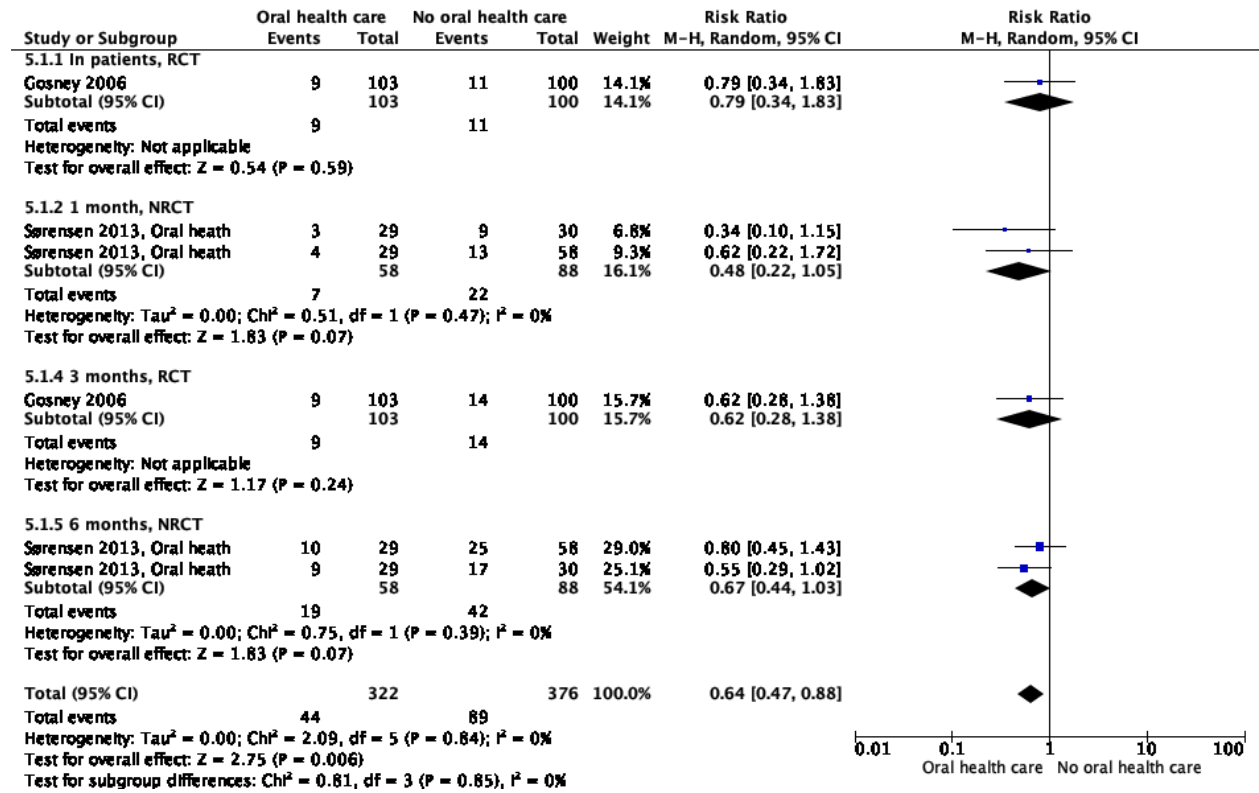



**Table 2: Effect of oral health on pneumonia in patients with dysphagia after stroke**

| Outcome                | Incidence % |         | n (N)   | OR [95% CI]         | I <sup>2</sup> | P value |
|------------------------|-------------|---------|---------|---------------------|----------------|---------|
|                        | Oral health | Control |         |                     |                |         |
| <b>Pneumonia</b>       |             |         |         |                     |                |         |
| • Overall              | 8.7%        | 13.9%   | 7(2110) | 0.39 [0.17, 0.91]   | 53%            | 0.03    |
| • RCT                  | 0.6%        | 5.6%    | 3(284)  | 0.14 [0.02, 1.11]   | NA             | 0.06    |
| • NRCT                 | 10.0%       | 15.2%   | 4(1826) | 0.47 [0.21, 1.06]   | 51%            | 0.07    |
| <b>Symptoms of RTI</b> |             |         |         |                     |                |         |
| • RCT                  | 0.4±0.7     | 0.6±0.7 | 1(94)   | -0.20 [-0.48, 0.08] | NA             | 0.17    |

CI: Confidence intervals; I<sup>2</sup>: Heterogeneity; n: Number of studies; N: Number of patients; NR: Not reported; p: Statistical significance value; RTI: respiratory tract infection; OR: Odds ratio

**Figure 2: Effect of oral health on pneumonia in patients with dysphagia after stroke**

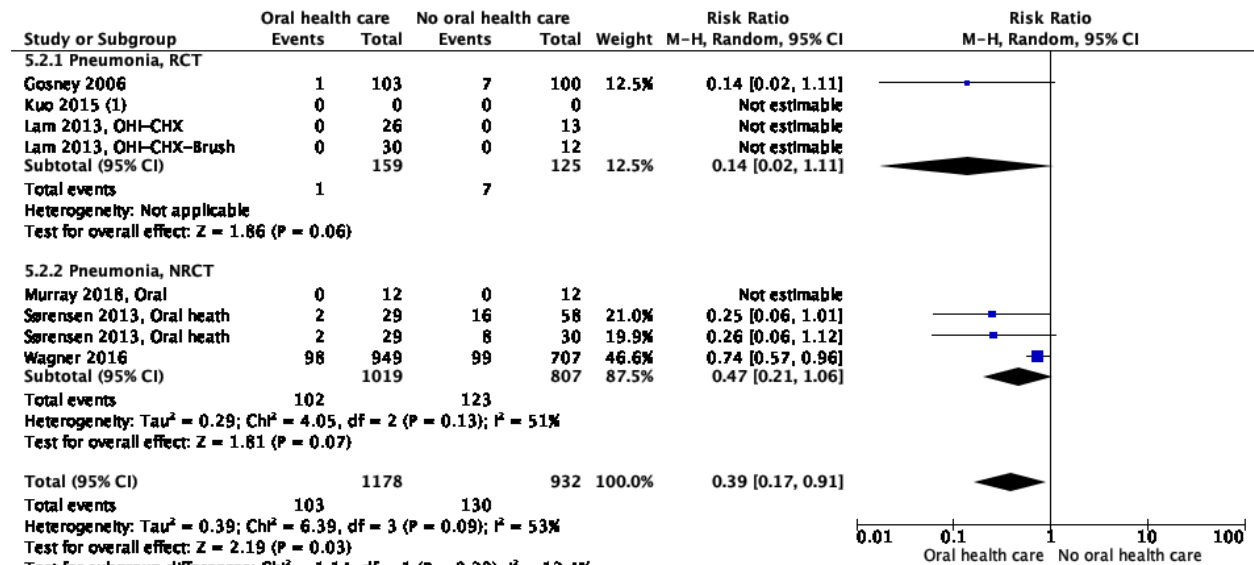

**Footnotes**

(1) Symptoms of respiratory tract infections (0-7), 0.4±0.7 vs 0.6±0.7, MD (-0.20 (-0.48, 0.08))

**Table 3: Effect of oral health on oral index in patients with dysphagia after stroke**

| Outcome                        | Mean±SD     |           | n (N)  | MD [95% CI]          | I <sup>2</sup> | P value  |
|--------------------------------|-------------|-----------|--------|----------------------|----------------|----------|
|                                | Oral health | Control   |        |                      |                |          |
| <b>Oral Health</b>             |             |           |        |                      |                |          |
| • Overall*                     | NA          | NA        | 6(235) | -1.27 [-2.26, -0.28] | 93%            | 0.01     |
| <b>OHAT</b>                    |             |           |        |                      |                |          |
| • RCT                          | NR          | NR        | NR     | NR                   | NR             | NR       |
| • NRCT                         | 3.0±1.3     | 4.0±2.5   | 1(24)  | -1.00 [-2.59, 0.59]  | NA             | 0.22     |
| <b>Oral index</b>              |             |           |        |                      |                |          |
| <b>Plaque index</b>            |             |           |        |                      |                |          |
| • RCT                          | 1.4±1.5     | 7.4±2.6   | 3(175) | -2.98 [-4.98, -0.98] | 98%            | 0.003    |
| <b>Tongue coating, WTCI</b>    |             |           |        |                      |                |          |
| • RCT                          | 1.8±2.1     | 9.0±2.7   | 1(94)  | -7.20 [-8.18, -6.22] | NA             | <0.00001 |
| <b>Gingival bleeding index</b> |             |           |        |                      |                |          |
| • RCT                          | 8.7±9.3     | 17.7±21.9 | 2(81)  | -8.85 [-17.77, 0.07] | 27%            | 0.05     |
| <b>R-Throat</b>                |             |           |        |                      |                |          |
| • RCT                          | 10.1±2.6    | 10.9±2.1  | 1(42)  | -0.80 [-2.23, 0.63]  | NA             | 0.27     |

I<sup>2</sup>: Heterogeneity; MD: Mean difference; n: Number of studies; N: Number of patients; p: Statistical significance value; OHAT: Scores on oral health assessment tool; SD: Standard Deviation; WTCI: Winkel Tongue Coating Index; \*: SMD

Figure 3: Effect of oral health on Oral Health Assessment Tool (OHAT) and R-throat and oral index in patients with dysphagia after stroke

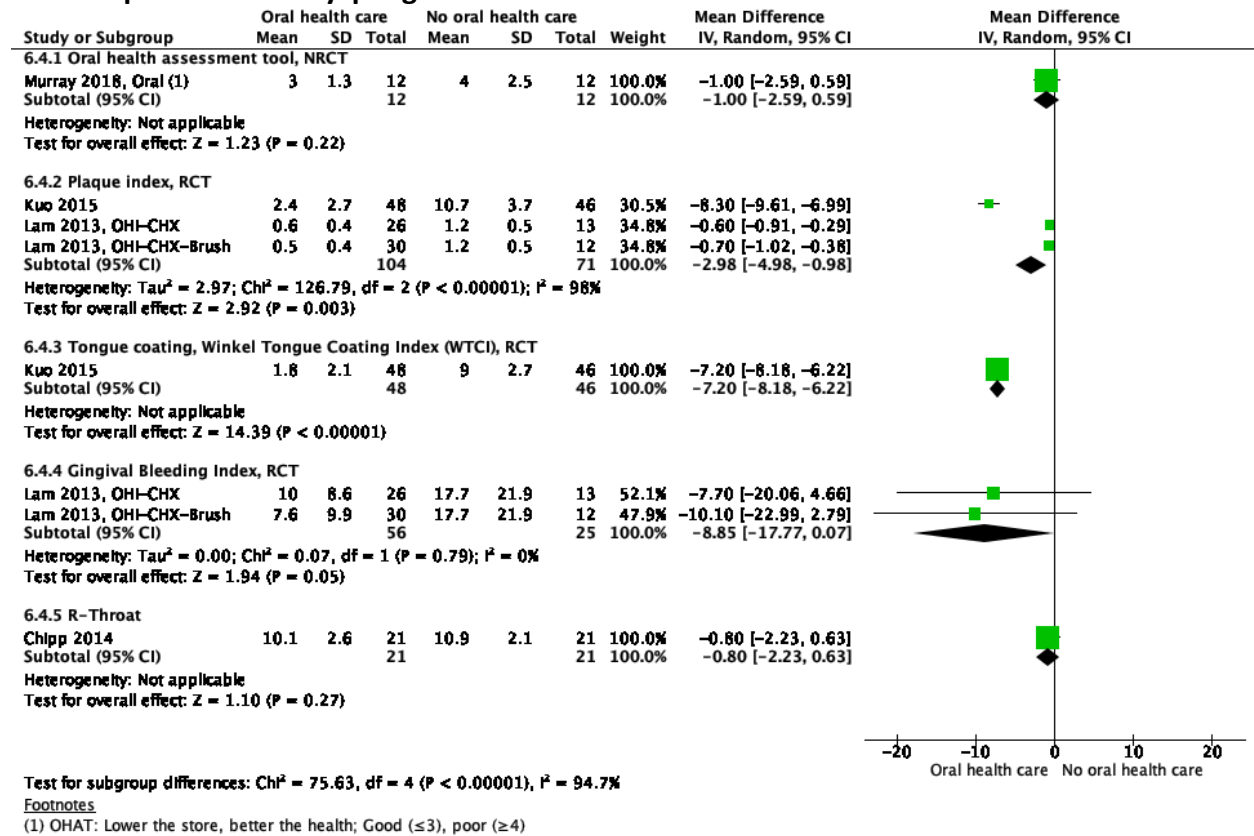

**Table 4: Effect of oral health on outcomes in patients with dysphagia after stroke**

| Outcome                        | Incidence %<br>Mean±SD |          | n (N)    | OR/ MD [95% CI]      | I <sup>2</sup> | P value  |
|--------------------------------|------------------------|----------|----------|----------------------|----------------|----------|
|                                | Oral health            | Control  |          |                      |                |          |
| <b>FOIS</b>                    |                        |          |          |                      |                |          |
| <b>Change</b>                  |                        |          |          |                      |                |          |
| • RCT                          | 2.9±1.2                | 0.6±0.8  | 1(43)    | 2.30 [1.70, 2.90]    | NA             | <0.00001 |
| <b>Post intervention</b>       |                        |          |          |                      |                |          |
| • RCT                          | 5.8±1.1                | 3.6±2.1  | 1(43)    | 2.20 [1.14, 3.26]    | NA             | <0.001   |
| <b>Tubing</b>                  |                        |          |          |                      |                |          |
| <b>Overall</b>                 | 18.1%                  | 29.1%    | 4(1853)  | 0.62 [0.48, 0.79]    | 36%            | 0.0001   |
| • RCT                          | 41.4%                  | 100.0%   | 51 (1)   | 0.43 [0.28, 0.65]    | NA             | < 0.0001 |
| • NRCT                         | 17.5%                  | 27.2%    | 1802 (3) | 0.68 [0.57, 0.81]    | 0%             | < 0.0001 |
| <b>NPO</b>                     |                        |          |          |                      |                |          |
| • RCT                          | NR                     | NR       | NR       | NR                   | NR             | NR       |
| • NRCT                         | 3.9%                   | 24.2%    | 1(84)    | 0.16 [0.04, 0.72]    | NA             | 0.02     |
| <b>PEG</b>                     |                        |          |          |                      |                |          |
| • RCT                          | NR                     | NR       | NR       | NR                   | NR             | NR       |
| • NRCT                         | 12.1%                  | 9.1%     | 2(146)   | 1.41 [0.51, 3.90]    | 0%             | 0.5      |
| <b>Unintended oral feeding</b> |                        |          |          |                      |                |          |
| • RCT                          | NR                     | NR       | NR       | NR                   | NR             | NR       |
| • NRCT                         | 31.8%                  | 54.5%    | 1(44)    | 0.58 [0.28, 1.20]    | NA             | 0.14     |
| <b>Length of stay</b>          |                        |          |          |                      |                |          |
| • RCT                          | NR                     | NR       | NR       | NR                   | NR             | NR       |
| • NRCT                         | 11.7±9.7               | 16.8±7.6 | 2(200)   | -3.21 [-5.26, -1.16] | 0%             | 0.002    |

CI: Confidence intervals; I<sup>2</sup>: Heterogeneity; MD: Mean difference; n: Number of studies; N: Number of patients; NPO: Nil per oral; p: Statistical significance value; PEG: Percutaneous endoscopic gastrostomy; OR: Odds ratio; SD: Standard Deviation; WTCl: Winkel Tongue Coating Index

**Figure 4: Effect of oral health on FOIS in patients with dysphagia after stroke**

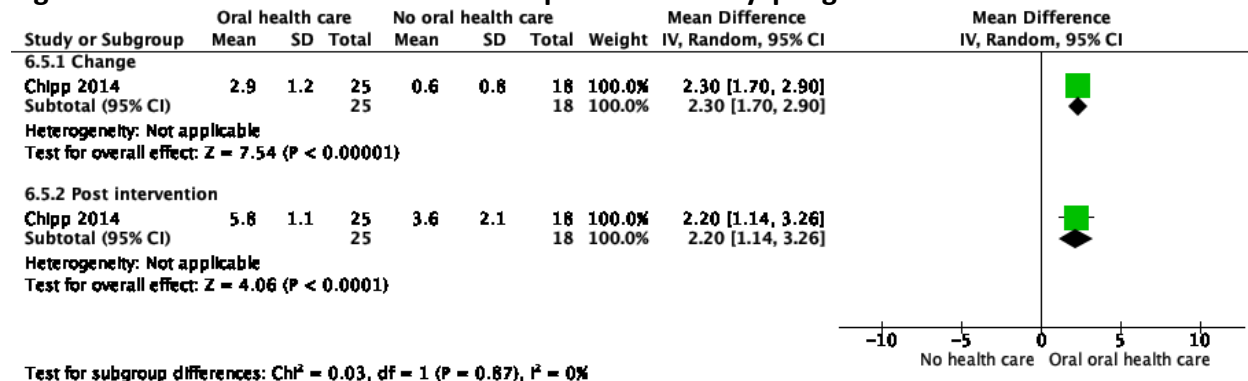

Figure 5: Effect of oral health on tubing, NPO, PEG and unintended oral feeding in patients with dysphagia after stroke

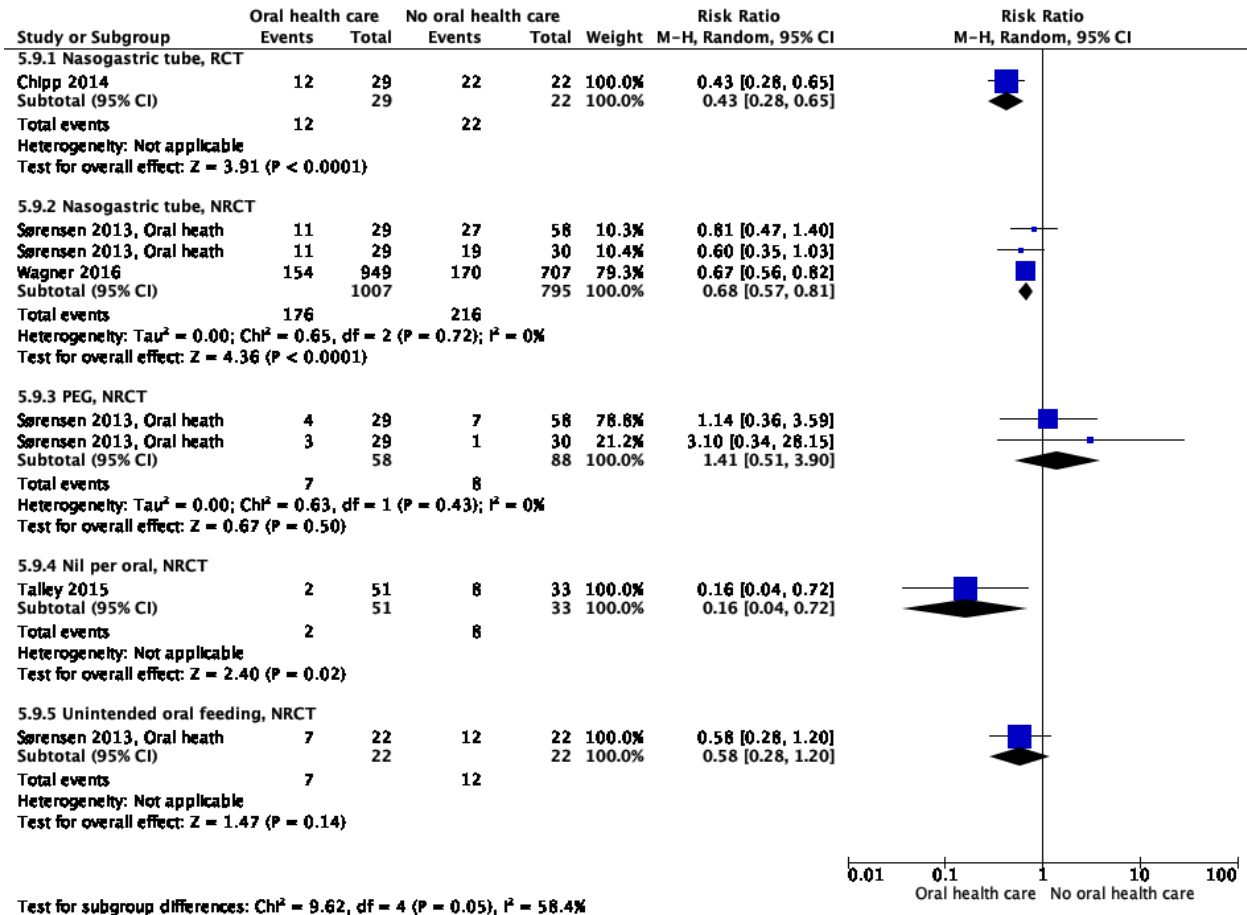

Figure 6: Effect of oral health on length of stay in hospital in patients with dysphagia after stroke

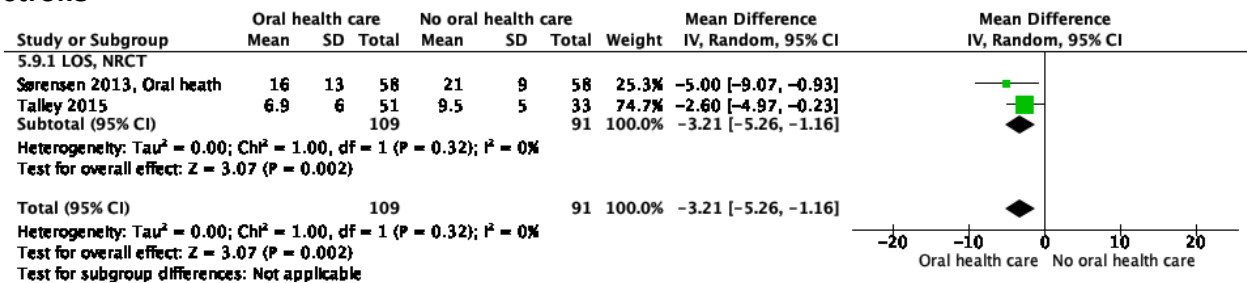

**Table 5: Effect of oral health on outcomes in patients with dysphagia after stroke**

| Outcome              | Incidence % |         | n (N)  | OR [95% CI]       | I <sup>2</sup> | P value |
|----------------------|-------------|---------|--------|-------------------|----------------|---------|
|                      | Oral health | Control |        |                   |                |         |
| <b>AGNB isolated</b> |             |         |        |                   |                |         |
| • RCT                | 6.8%        | 21.0%   | 1(203) | 0.32 [0.14, 0.73] | NA             | 0.006   |
| <b>AGNB carriage</b> |             |         |        |                   |                |         |
| • RCT                | 14.6%       | 16.0%   | 1(203) | 0.91 [0.48, 1.74] | NA             | 0.78    |
| <b>Infections</b>    |             |         |        |                   |                |         |
| • RCT                | 3.9%        | 10.0%   | 1(203) | 0.39 [0.13, 1.20] | NA             | 0.1     |
| <b>UTI</b>           |             |         |        |                   |                |         |
| • NRCT               | 44.8%       | 41.4%   | 1(116) | 1.08 [0.71, 1.65] | NA             | 0.71    |

AGNB: Aerobic Gram-negative bacilli; CI: Confidence intervals; I<sup>2</sup>: Heterogeneity; MD: Mean difference; n: Number of studies; N: Number of patients; p: Statistical significance value; OR: Odds ratio

**Figure 7: Effect of oral health on infections in patients with dysphagia after stroke**

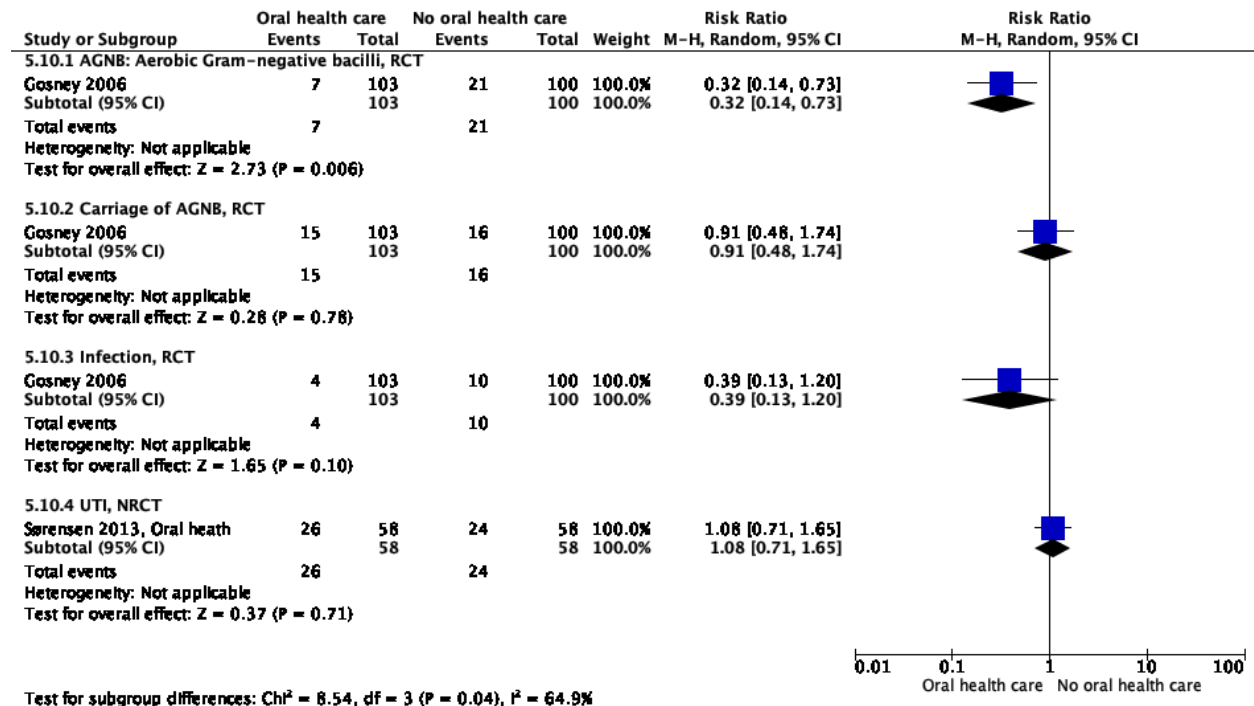

**Table 6: Effect of oral health on oral index in patients with dysphagia after stroke**

| Outcome          | Incidence %<br>Mean±SD |         | n (N)  | OR/ MD [95% CI]     | I <sup>2</sup> | P value |
|------------------|------------------------|---------|--------|---------------------|----------------|---------|
|                  | Oral health            | Control |        |                     |                |         |
| <b>BI</b>        |                        |         |        |                     |                |         |
| <b>1 week</b>    |                        |         |        |                     |                |         |
| • RCT            | NR                     | NR      | NR     | NR                  | NR             | NR      |
| • NRCT           | 15±36                  | 7±18    | 1(116) | 8.00 [-2.36, 18.36] | NA             | 0.13    |
| <b>Discharge</b> |                        |         |        |                     |                |         |
| • RCT            | NR                     | NR      | NR     | NR                  | NR             | NR      |
| • NRCT           | 17±43                  | 12±29   | 1(116) | 5.00 [-8.35, 18.35] | NA             | 0.46    |

CI: Confidence intervals; I<sup>2</sup>: Heterogeneity; MD: Mean difference; n: Number of studies; N: Number of patients; p: Statistical significance value; OR: Odds ratio; SD: Standard Deviation

**Figure 8: Effect of oral health on BI in patients with dysphagia after stroke**

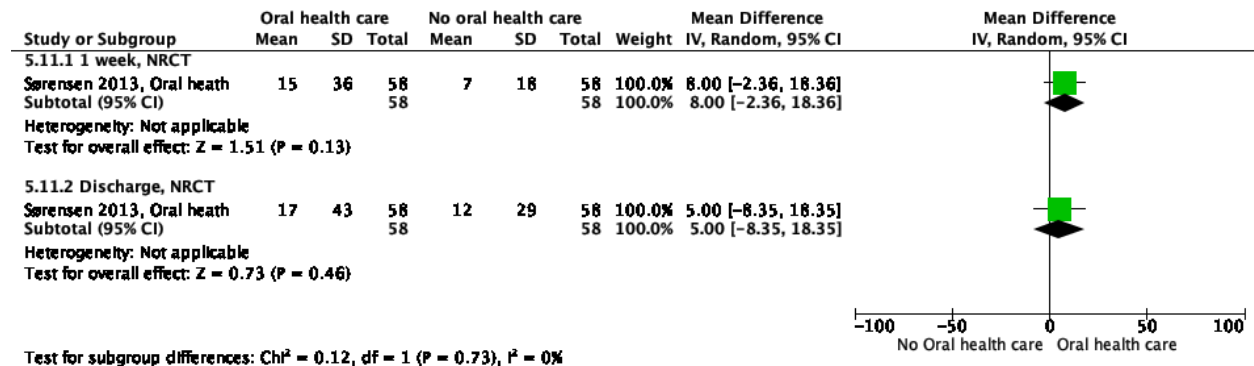

## Treatment 5 – Pharmacological Treatment

Table 1: Effect of drugs on mortality and pneumonia in patients with dysphagia after stroke

| Outcome                                | Incidence %    |                | n (N)              | RR [95% CI]                              | I <sup>2</sup> | P value        |
|----------------------------------------|----------------|----------------|--------------------|------------------------------------------|----------------|----------------|
|                                        | Drugs          | Control        |                    |                                          |                |                |
| <b>Mortality</b>                       |                |                |                    |                                          |                |                |
| ACE inhibitors                         |                |                |                    |                                          |                |                |
| • Overall                              | 10.3%          | 10.5%          | 4(6733)            | 0.96 [0.54, 1.69]                        | 75%            | 0.88           |
| • RCTs: vs Control                     | 10.6%          | 11.0%          | 3(6244)            | 0.97 [0.46, 2.04]                        | 83%            | 0.93           |
| • NRCT: vs Control                     | 4.8%           | 5.6%           | 1(489)             | 0.86 [0.37, 1.99]                        | NA             | 0.72           |
| TRPV-agonists: RCT                     | 0.0%           | 2.9%           | 1(70)              | 0.33 [0.01, 7.91]                        | NA             | 0.5            |
| Dopaminergic drugs:<br>RCT             | 15.2%          | 42.9%          | 1(68)              | 0.35 [0.14, 0.86]                        | NA             | 0.02           |
| Antibiotics: RCTs                      | 16.1%          | 15.3%          | 7(4301)            | 1.05 [0.87, 1.26]                        | 16%            | 0.61           |
| Metoclopramide: RCT                    | 26.7%          | 40.0%          | 1(60)              | 0.67 [0.32, 1.39]                        | NA             | 0.28           |
| <b>Pneumonia</b>                       |                |                |                    |                                          |                |                |
| ACE inhibitors                         |                |                |                    |                                          |                |                |
| • Overall                              | 4.1%           | 7.6%           | 12(10611)          | 0.60 [0.51, 0.70]                        | 61%            | < 0.00001      |
| • RCTs: Vs Control<br>(Fatal)          | 4.4%<br>(2.2%) | 5.2%<br>(2.2%) | 2(6176)<br>2(6176) | 0.86 [0.69, 1.06]<br>(1.02 [0.74, 1.42]) | 61%<br>(79%)   | 0.16<br>(0.89) |
| • NRCTs: Vs Control                    | 3.6%           | 11.4%          | 4(1491)            | 0.41 [0.26, 0.64]                        | 0%             | < 0.0001       |
| • NRCTs: vs other<br>antihypertensives | 3.9%           | 10.6%          | 6(2944)            | 0.38 [0.28, 0.52]                        | 0%             | < 0.00001      |
| TRPV-agonists                          |                |                |                    |                                          |                |                |
| • Overall                              | 9.6%           | 32.7%          | 2(104)             | 0.31 [0.15, 0.66]                        | 0%             | 0.002          |
| • RCT: Vs Control                      | 0.0%           | 2.9%           | 1(70)              | 0.33 [0.01, 7.91]                        | NA             | 0.50           |
| • NRCT: Vs Control                     | 29.4%          | 94.1%          | 1(34)              | 0.31 [0.15, 0.66]                        | NA             | 0.002          |
| Dopaminergic drugs:<br>RCT             | 6.0%           | 27.5%          | 1(163)             | 0.22 [0.09, 0.55]                        | NA             | 0.001          |
| Antibiotics: RCTs                      | 10.3%          | 11.1%          | 6(4201)            | 0.93 [0.78, 1.10]                        | 17%            | 0.40           |
| Metoclopramide: RCT                    | 26.7%          | 86.7%          | 1(60)              | 0.31 [0.17, 0.57]                        | NA             | 0.0002         |

ACE: Angiotensin converting enzyme; CI: Confidence intervals; I<sup>2</sup>, p: Heterogeneity; n: Number of studies; N: Number of patients; NA: Not applicable; NRCT: Non-Randomized Controlled Trial; p: Statistical significance value; RCT: Randomized Controlled Trial; RR: Risk ratio; TRPV: transient receptor potential vanilloid



Figure 1: Mortality with ACE inhibitors in patients with dysphagia after stroke

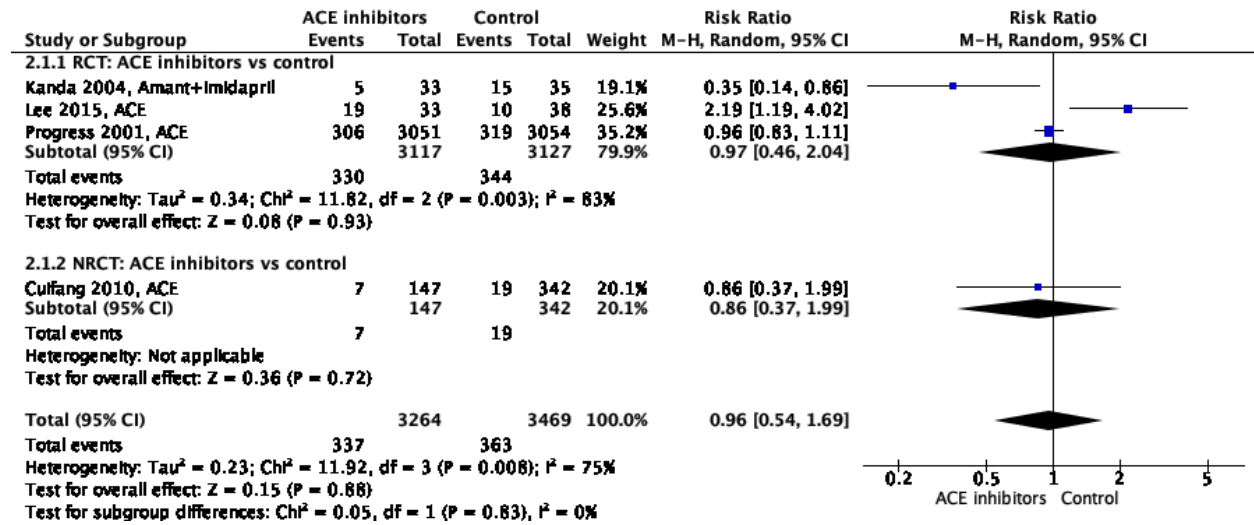

Figure 2: Mortality with TRPV-agonists, dopaminergic drugs, antibiotics and metoclopramide in patients with dysphagia after stroke

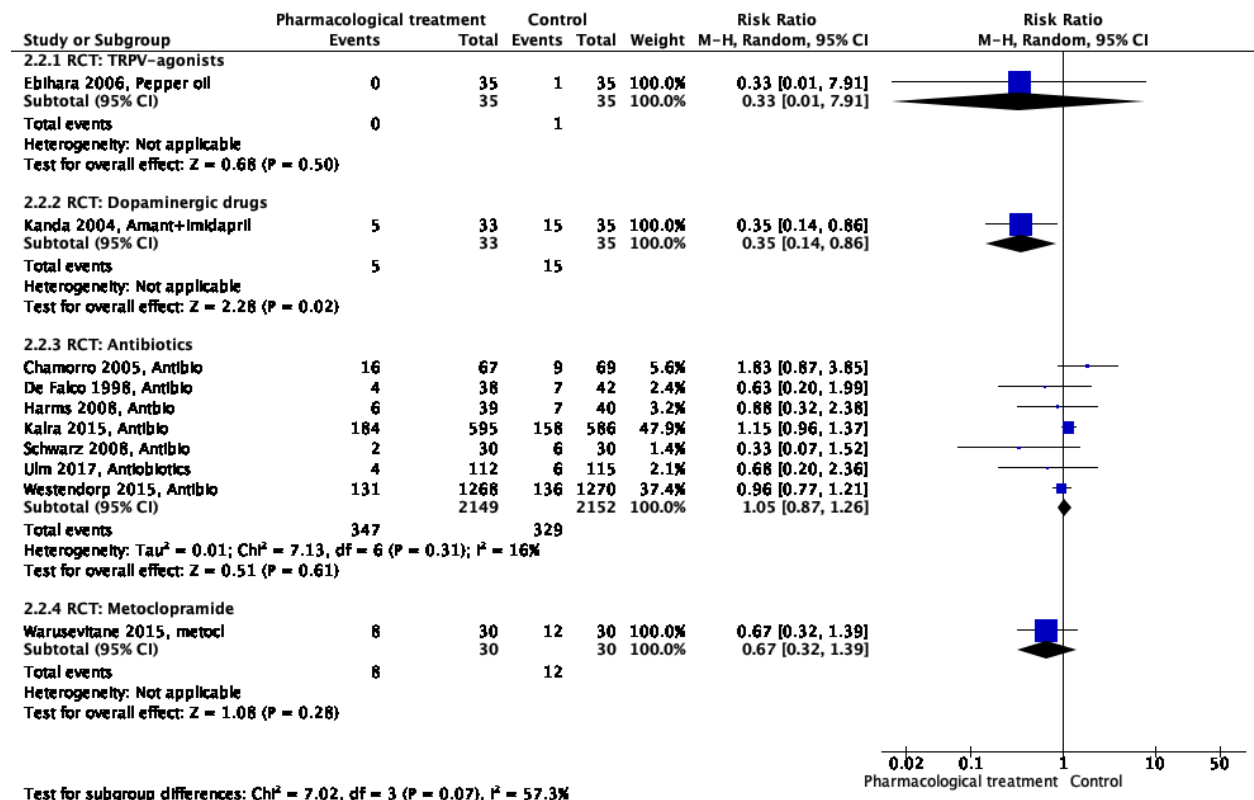

Figure 3: Pneumonia with ACE inhibitors in patients with dysphagia after stroke

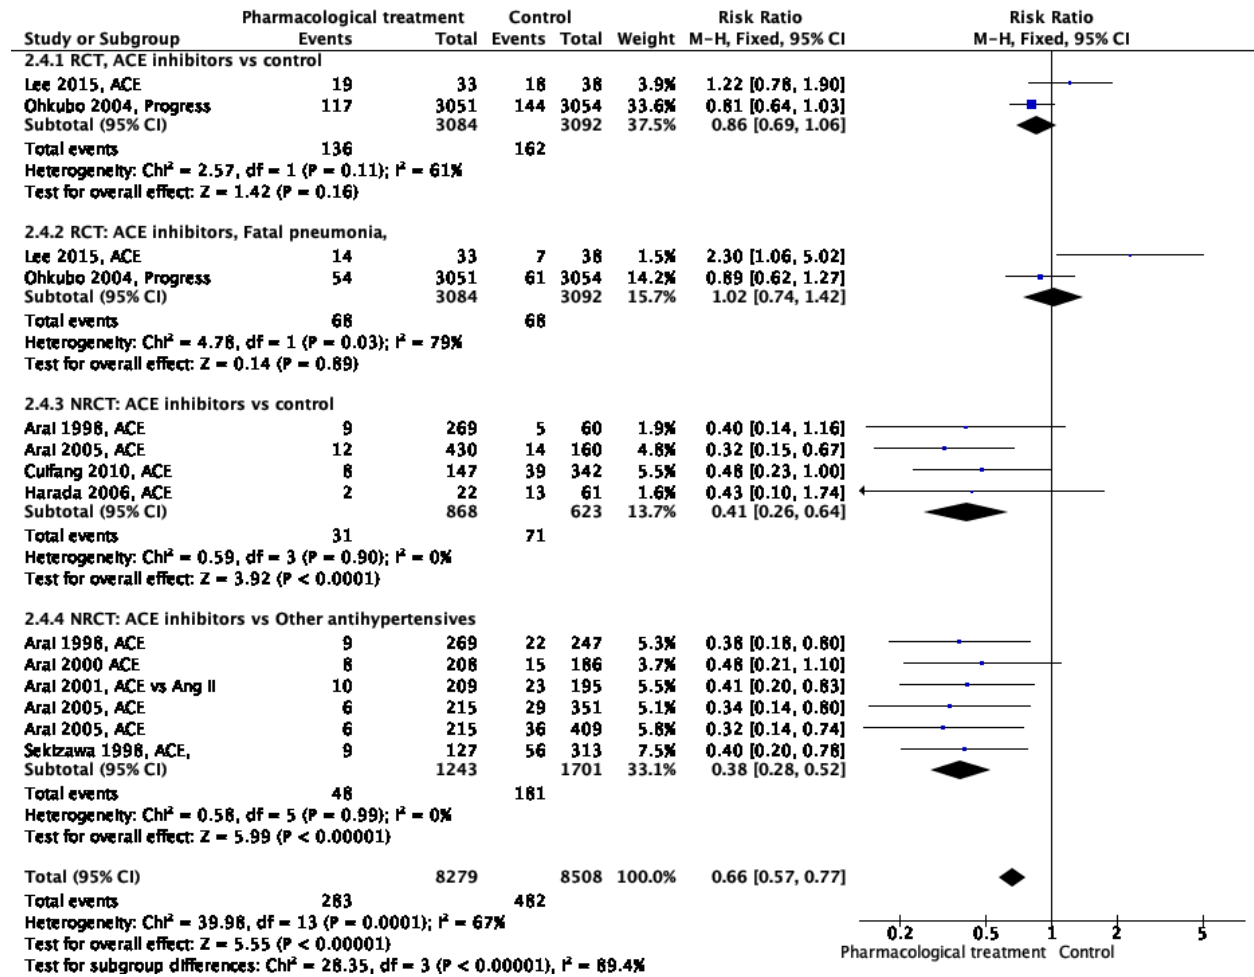

Figure 4: Pneumonia with TRPV-agonists in patients with dysphagia after stroke

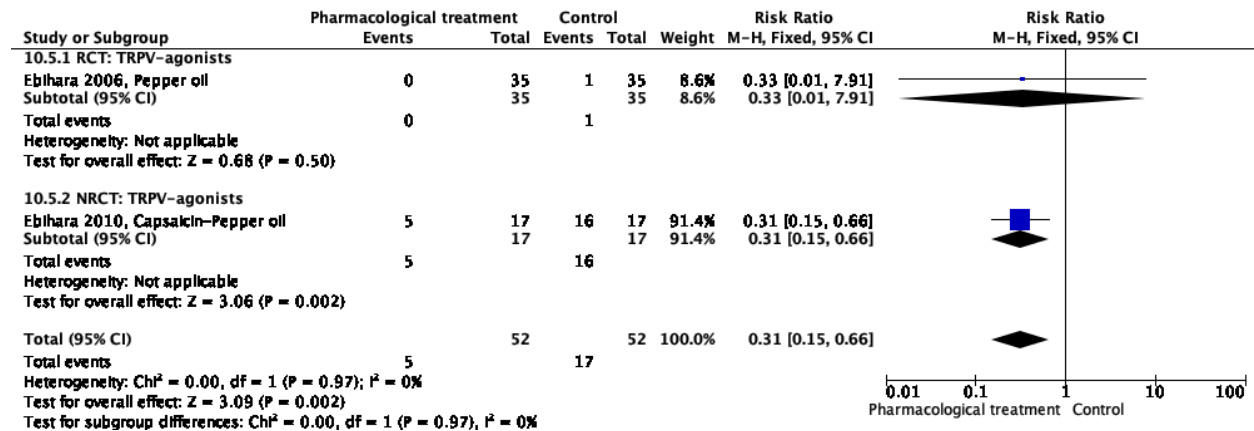

Figure 5: Pneumonia with dopaminergic drugs, antibiotics and metoclopramide in patients with dysphagia after stroke

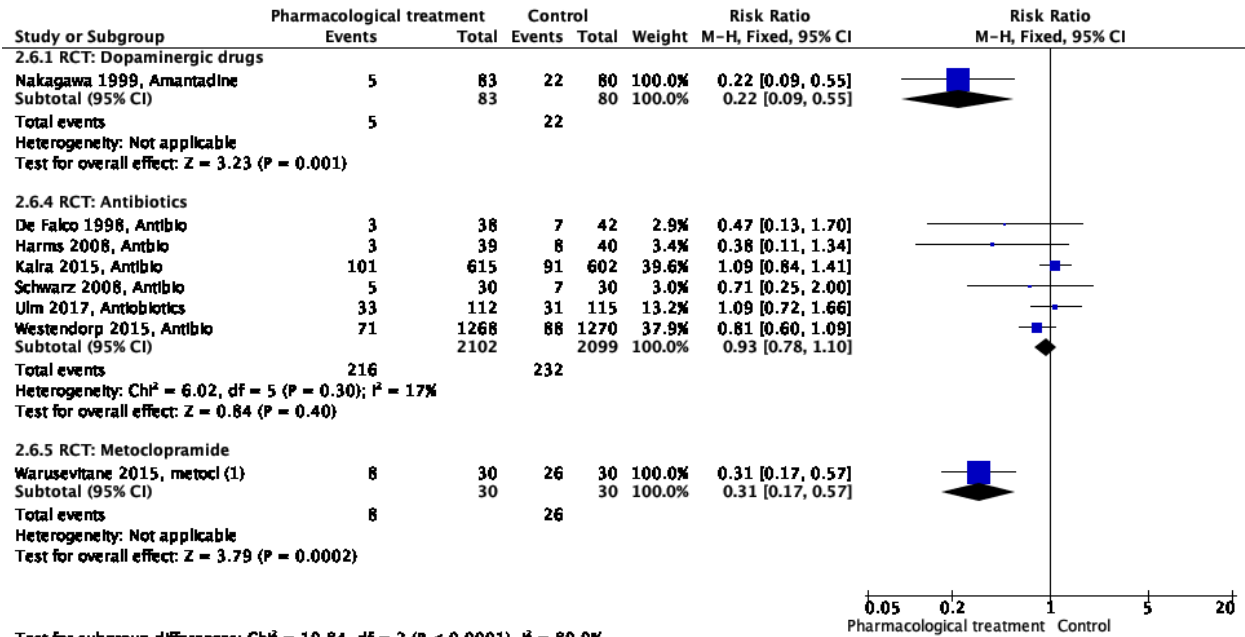

**Table 2: Effect of antibiotics on mRS in patients with dysphagia after stroke**

| Outcome             | Incidence % |         | n (N)   | RR [95% CI]        | I <sup>2</sup> | P value |
|---------------------|-------------|---------|---------|--------------------|----------------|---------|
|                     | Drugs       | Control |         |                    |                |         |
| <b>mRS</b>          |             |         |         |                    |                |         |
| • Antibiotics: RCTs |             |         |         |                    |                |         |
| • mRS 0, 1          | 8.8%        | 8.8%    | 2(1408) | 1.80 [0.31, 10.34] | 81%            | 0.51    |
| • mRS 0-2           | 46.0%       | 45.4%   | 3(3946) | 1.02 [0.83, 1.25]  | 56%            | 0.85    |
| • mRS 3-6           | 43.3%       | 45.4%   | 3(2825) | 0.97 [0.91, 1.02]  | 31%            | 0.25    |
| • mRS 4-6           | 29.0%       | 30.3%   | 3(2825) | 0.93 [0.85, 1.03]  | 2%             | 0.16    |

CI: Confidence intervals; I<sup>2</sup>, p: Heterogeneity; n: Number of studies; N: Number of patients; p: Statistical significance value; RCT: Randomized Controlled Trial; RR: Risk ratio

**Figure 6: mRS with antibiotics in patients with dysphagia after stroke**

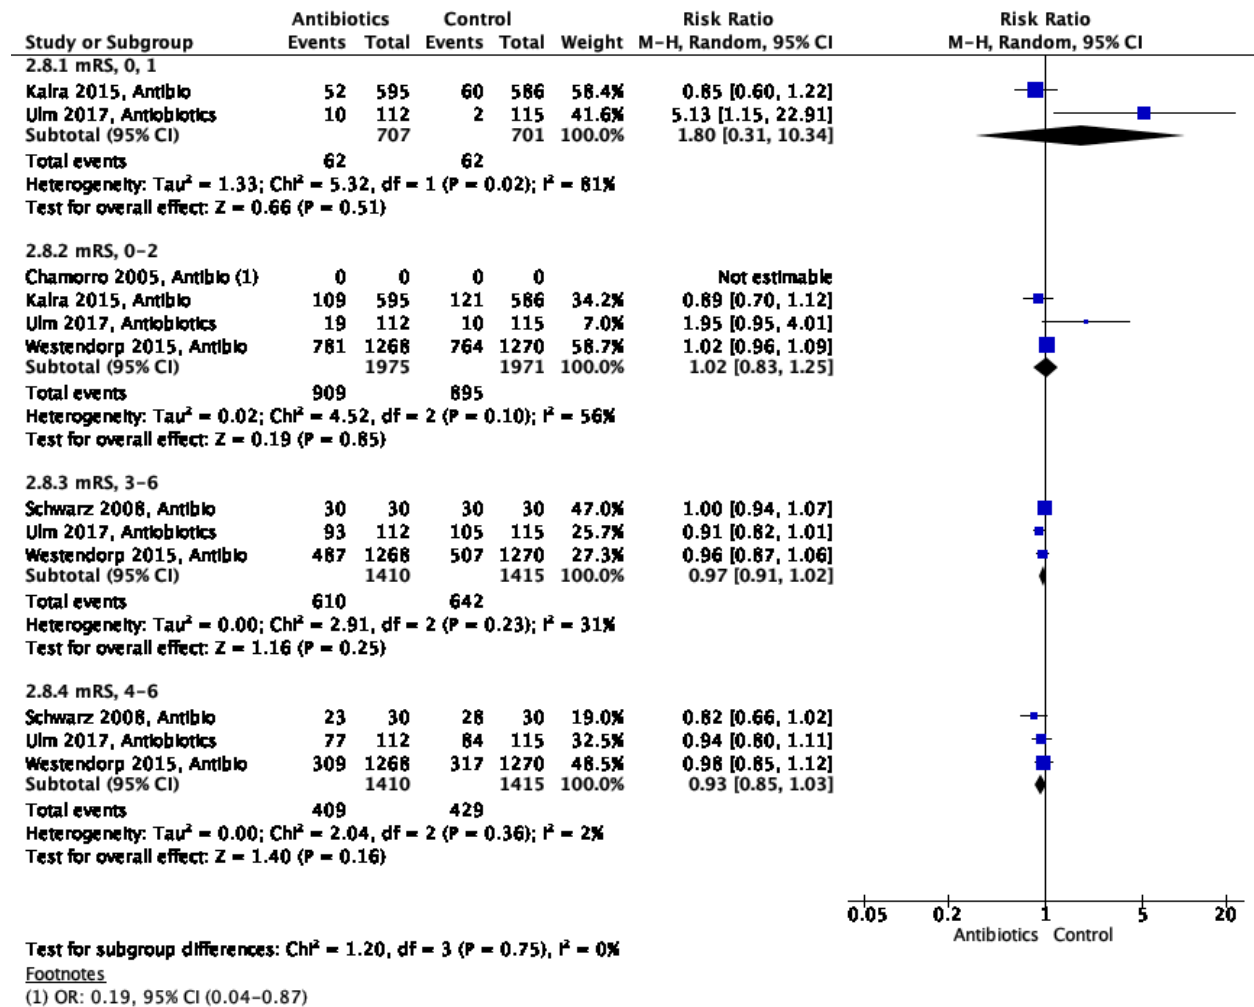

**Table 3: Effect of drugs on tracheobronchitis and pneumothorax in patients with dysphagia after stroke**

| Outcome                  | Incidence % |         | n (N) | RR [95% CI]       | I <sup>2</sup> | P value |
|--------------------------|-------------|---------|-------|-------------------|----------------|---------|
|                          | Drugs       | Control |       |                   |                |         |
| <b>Tracheobronchitis</b> |             |         |       |                   |                |         |
| • Antibiotics: RCT       | 6.7%        | 10.0%   | 1(60) | 0.67 [0.12, 3.71] | NA             | 0.64    |
| <b>Pneumothorax</b>      |             |         |       |                   |                |         |
| • Antibiotics: RCT       | 0.0%        | 2.5%    | 1(79) | 0.34 [0.01, 8.14] | NA             | 0.51    |

CI: Confidence intervals; I<sup>2</sup>, p: Heterogeneity; n: Number of studies; N: Number of patients; NA: Not applicable; p: Statistical significance value; RCT: Randomized Controlled Trial; RR: Risk ratio

**Figure 7: Chest complications with antibiotics in patients with dysphagia after stroke**

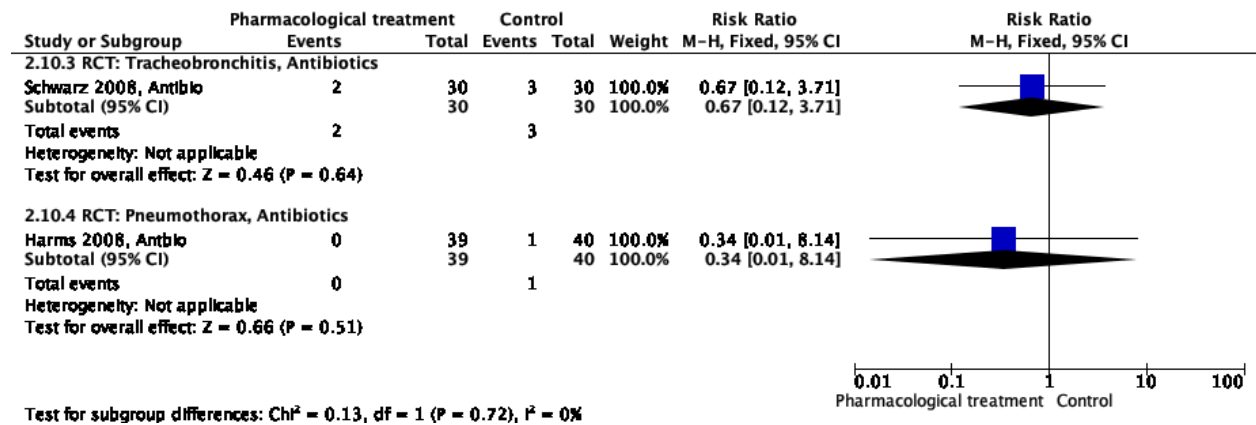

**Table 4: Effect of drugs on stroke and TIA in patients with dysphagia after stroke**

| Outcome                | Incidence % |         | n (N)    | RR [95% CI]       | I <sup>2</sup> | P value |
|------------------------|-------------|---------|----------|-------------------|----------------|---------|
|                        | Drugs       | Control |          |                   |                |         |
| <b>Stroke</b>          |             |         |          |                   |                |         |
| • ACE inhibitors: RCTs | 9.0%        | 10.2%   | 2(26437) | 0.84 [0.65, 1.08] | 89%            | 0.16    |
| • Antibiotics: RCTs    | 12.9%       | 13.7%   | 5(6599)  | 0.94 [0.84, 1.05] | 0%             | 0.27    |
| <b>TIA</b>             |             |         |          |                   |                |         |
| • Antibiotics: RCT     | 6.5%        | 5.3%    | 1(2538)  | 1.23 [0.90, 1.68] | NA             | 0.2     |

ACE: Angiotensin converting enzyme; CI: Confidence intervals; I<sup>2</sup>, p: Heterogeneity; n: Number of studies; N: Number of patients; NA: Not applicable; p: Statistical significance value; RCT: Randomized Controlled Trial; RR: Risk ratio; TIA: Transient ischemic attack

**Figure 8: Stroke and TIA with ACE inhibitors and antibiotics in patients with dysphagia after stroke**

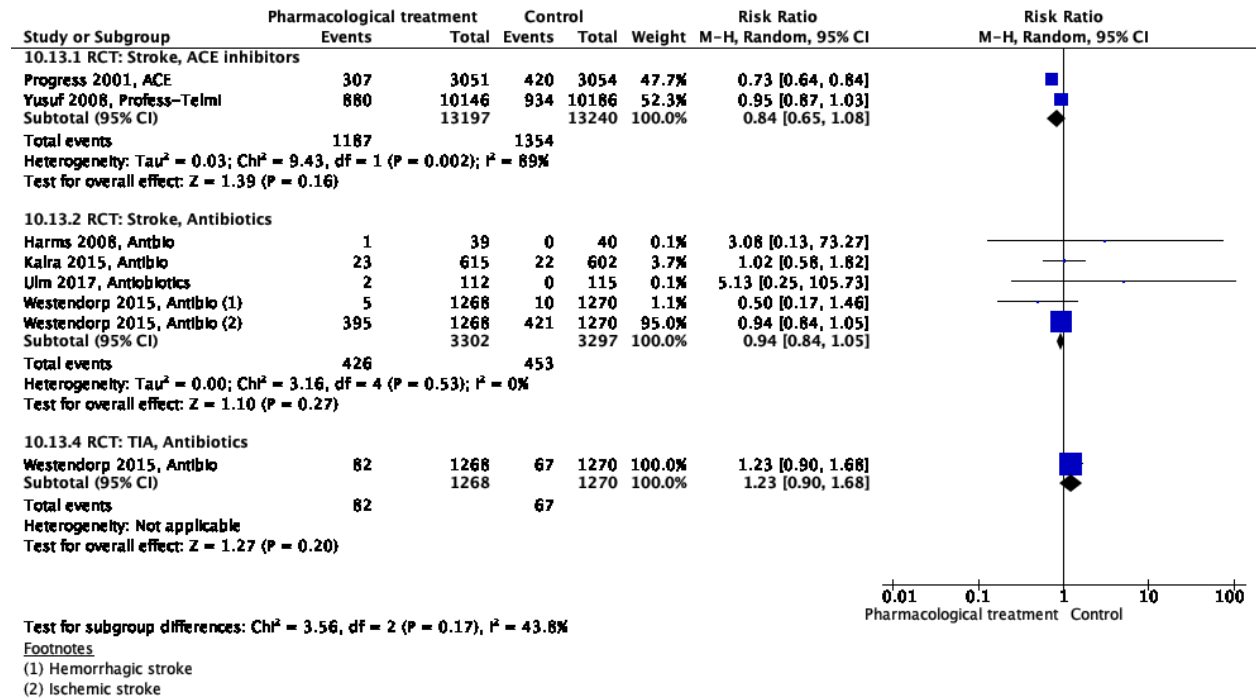

**Table 5: Effect of drugs on infections in patients with dysphagia after stroke**

| Outcome                 | Incidence % |         | n (N)   | RR [95% CI]       | I <sup>2</sup> | P value      |
|-------------------------|-------------|---------|---------|-------------------|----------------|--------------|
|                         | Drugs       | Control |         |                   |                |              |
| <b>Infections</b>       |             |         |         |                   |                |              |
| ACE inhibitors: RCT     | 12.1%       | 45.7%   | 1(68)   | 0.27 [0.10, 0.71] | NA             | <b>0.008</b> |
| Dopaminergic drugs: RCT | 12.1%       | 45.7%   | 1(68)   | 0.27 [0.10, 0.71] | NA             | <b>0.008</b> |
| Antibiotics: RCTs       | 14.5%       | 20.8%   | 6(4090) | 0.68 [0.54, 0.86] | 52%            | 0.001        |
| • Overall               | 15.3%       | 21.2%   | 7(4317) | 0.73 [0.58, 0.92] | 59%            | 0.007        |
| • UTI                   | 4.0%        | 9.6%    | 5(4121) | 0.46 [0.32, 0.68] | 40%            | <0.0001      |
| • E coli                | 5.1%        | 32.5%   | 1(79)   | 0.16 [0.04, 0.65] | NA             | 0.01         |
| • C difficile           | 0.3%        | 0.7%    | 1(1217) | 0.49 [0.09, 2.66] | NA             | 0.41         |
| • MRSA                  | 1.8%        | 2.3%    | 1(1217) | 0.77 [0.35, 1.68] | NA             | 0.51         |
| Metoclopramide: RCT     | 10.0%       | 36.7%   | 1(60)   | 0.27 [0.08, 0.88] | NA             | <b>0.03</b>  |

ACE: Angiotensin converting enzyme; CI: Confidence intervals; I<sup>2</sup>, p: Heterogeneity; MRSA: Methicillin-resistant Staphylococcus aureus; n: Number of studies; N: Number of patients; NA: Not applicable; p: Statistical significance value; RCT: Randomized Controlled Trial; RR: Risk ratio; UTI: Urinary tract infections

**Figure 9: Infections with ACE inhibitors and dopaminergic drugs in patients with dysphagia after stroke**

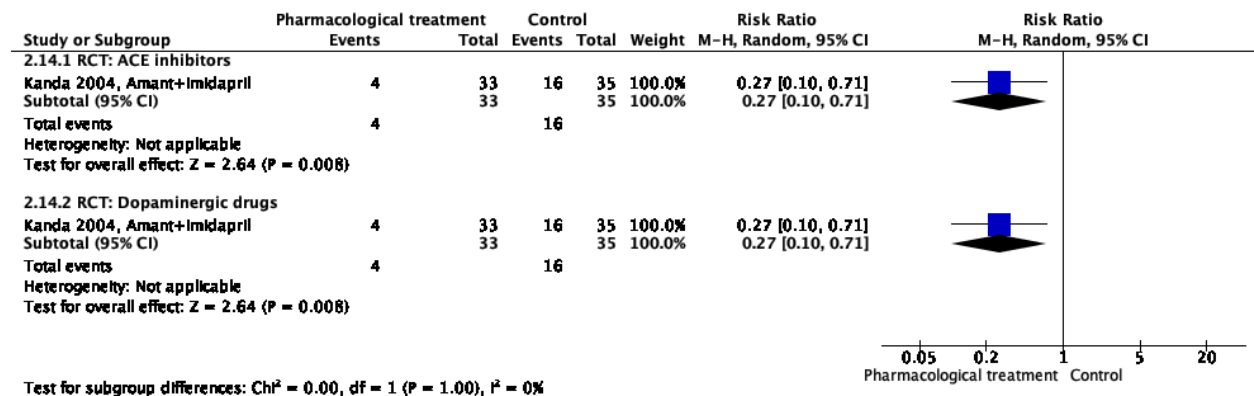

Figure 10: Various infections with antibiotics in patients with dysphagia after stroke

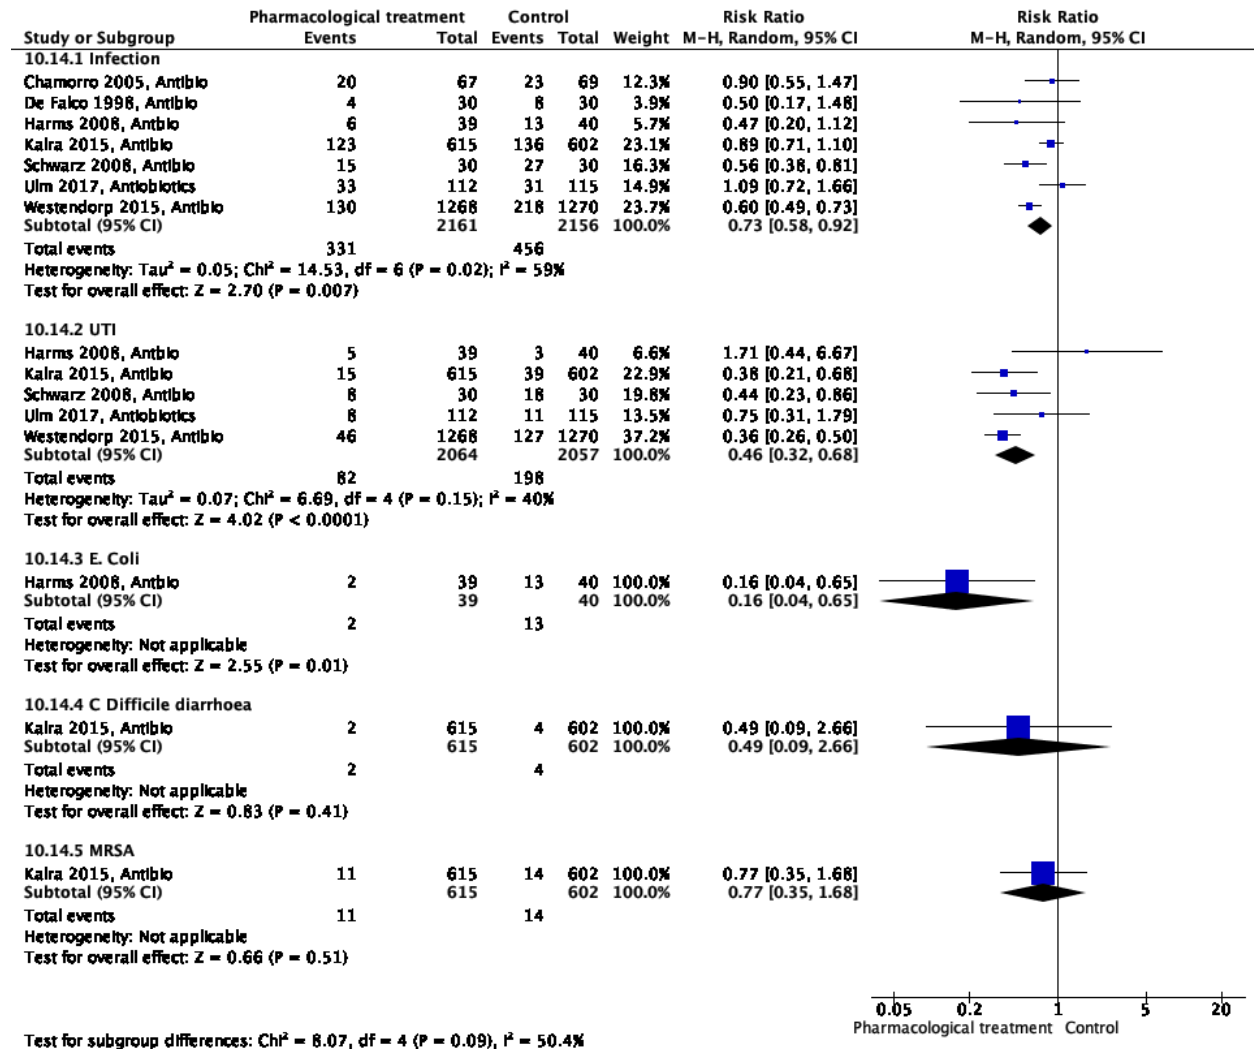

Figure 11: Infections with metoclopramide in patients with dysphagia after stroke

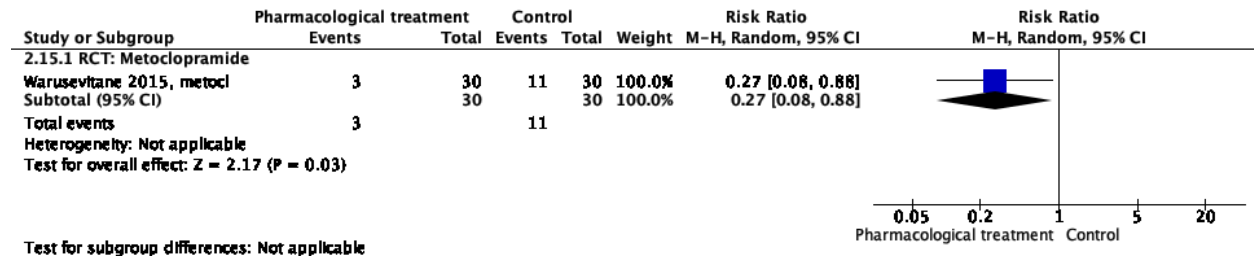



Table 6: Effect of drugs on composite outcomes in patients with dysphagia after stroke

| Outcome                                                                        | Incidence % |         | n (N)    | RR [95% CI]       | I <sup>2</sup> | P value |
|--------------------------------------------------------------------------------|-------------|---------|----------|-------------------|----------------|---------|
|                                                                                | Drugs       | Control |          |                   |                |         |
| <b>Vascular death, Non-fatal MI, non-fatal stroke</b>                          |             |         |          |                   |                |         |
| • ACE inhibitor, ARB: RCT                                                      | 13.2%       | 15.0%   | 2(26437) | 0.85 [0.69, 1.05] | 90%            | 0.12    |
| <b>Vascular death, recurrent stroke, MI, or new or worsening heart failure</b> |             |         |          |                   |                |         |
| • ARB: RCT                                                                     | 13.5%       | 14.4%   | 1(20332) | 0.94 [0.88, 1.00] | NA             | 0.07    |

ARB: Angiotensin receptor blocker; ACE: Angiotensin converting enzyme; CI: Confidence intervals; I<sup>2</sup>, p: Heterogeneity; n: Number of studies; N: Number of patients; NA: Not applicable; p: Statistical significance value; RCT: Randomized Controlled Trial; MI: Myocardial infarction; RR: Risk ratio

Figure 12: Composite outcomes (Vascular death, myocardial infarction, stroke or heart failure) in patients with dysphagia after stroke

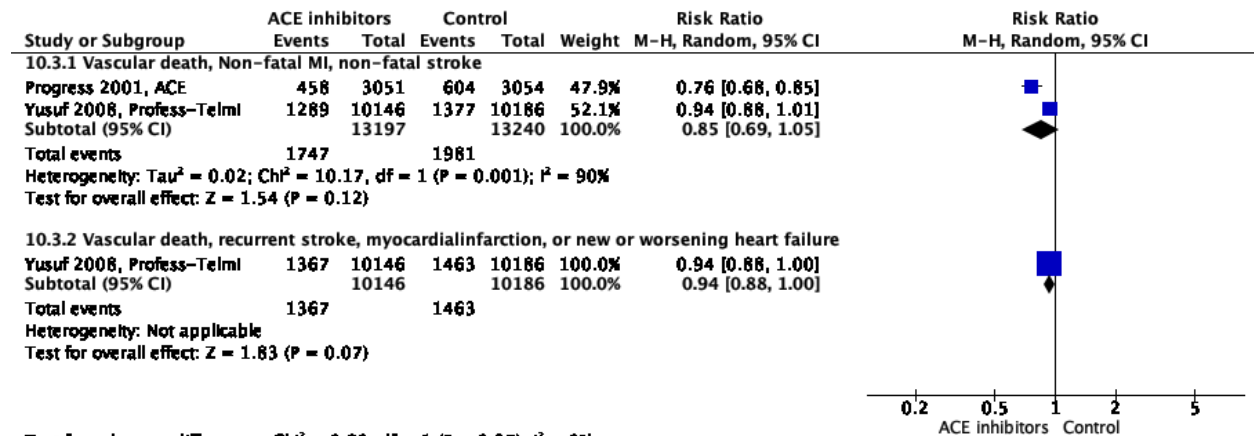

Table 7: Effect of drugs on complications in patients with dysphagia after stroke

| Outcome                         | Incidence % |         | n (N)   | RR [95% CI]       | I <sup>2</sup> | P value |
|---------------------------------|-------------|---------|---------|-------------------|----------------|---------|
|                                 | Drugs       | Control |         |                   |                |         |
| <b>Aberrant bolus movement</b>  |             |         |         |                   |                |         |
| • Levodopa: RCT                 | 93.5%       | 98.0%   | 1(298)  | 0.95 [0.91, 1.00] | NA             | 0.05    |
| <b>Dorsal head compensation</b> |             |         |         |                   |                |         |
| • Levodopa: RCT                 | 93.0%       | 96.9%   | 1(298)  | 0.96 [0.91, 1.01] | NA             | 0.12    |
| <b>Abnormal posture</b>         |             |         |         |                   |                |         |
| • Levodopa: RCT                 | 63.5%       | 68.4%   | 1(298)  | 0.93 [0.78, 1.10] | NA             | 0.40    |
| <b>Bleeding, intracranial</b>   |             |         |         |                   |                |         |
| • Antibiotics: RCT              | 2.3%        | 2.0%    | 1(1217) | 1.14 [0.53, 2.45] | NA             | 0.73    |
| <b>Bleeding GIT</b>             |             |         |         |                   |                |         |
| • Antibiotics: RCT              | 0.8%        | 1.0%    | 1(1217) | 0.82 [0.25, 2.66] | NA             | 0.74    |
| <b>Transfer to ICU</b>          |             |         |         |                   |                |         |
| • Antibiotics: RCT              | 1.0%        | 0.7%    | 1217    | 1.47 [0.42, 5.18] | NA             | 0.55    |

CI: Confidence intervals; I<sup>2</sup>, p: Heterogeneity; MD: Mean difference; n: Number of studies; N: Number of patients; NA: Not applicable; p: Statistical significance value; RCT: Randomized Controlled Trial; RR: Risk ratio

Figure 13: Bolus movement, dorsal head compensation and abnormal posture in patients with dysphagia after stroke

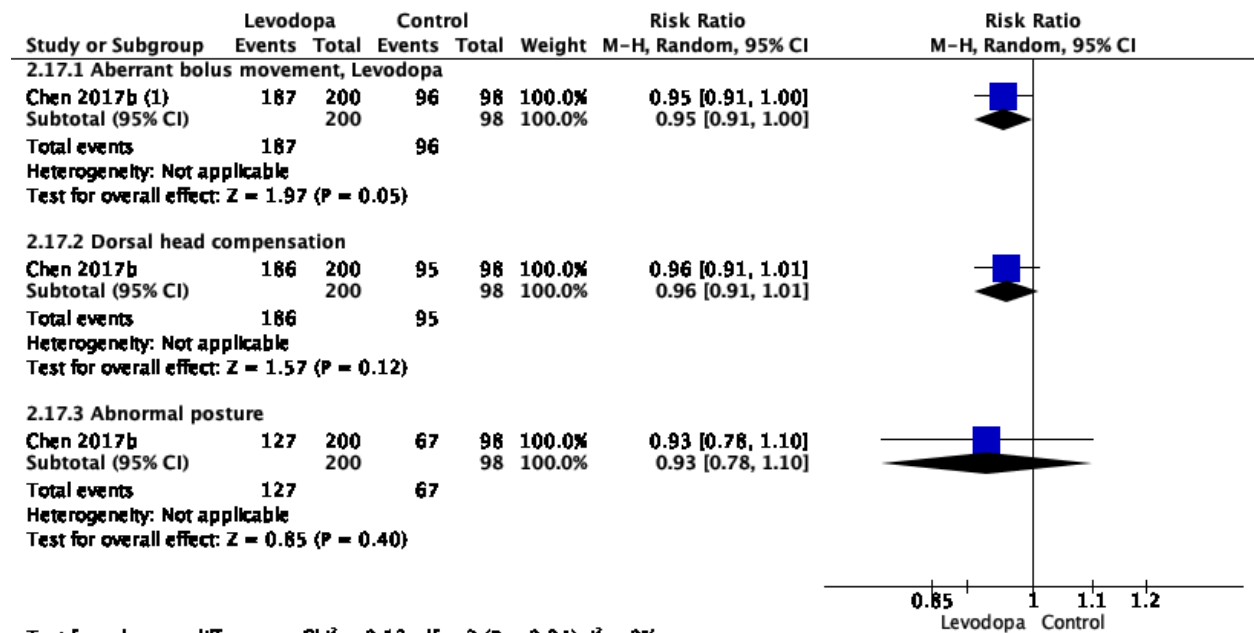

Footnotes

(1) Levodopa

Figure 14: Bleeding and transfer of patients (of stroke with dysphagia) to intensive care unit

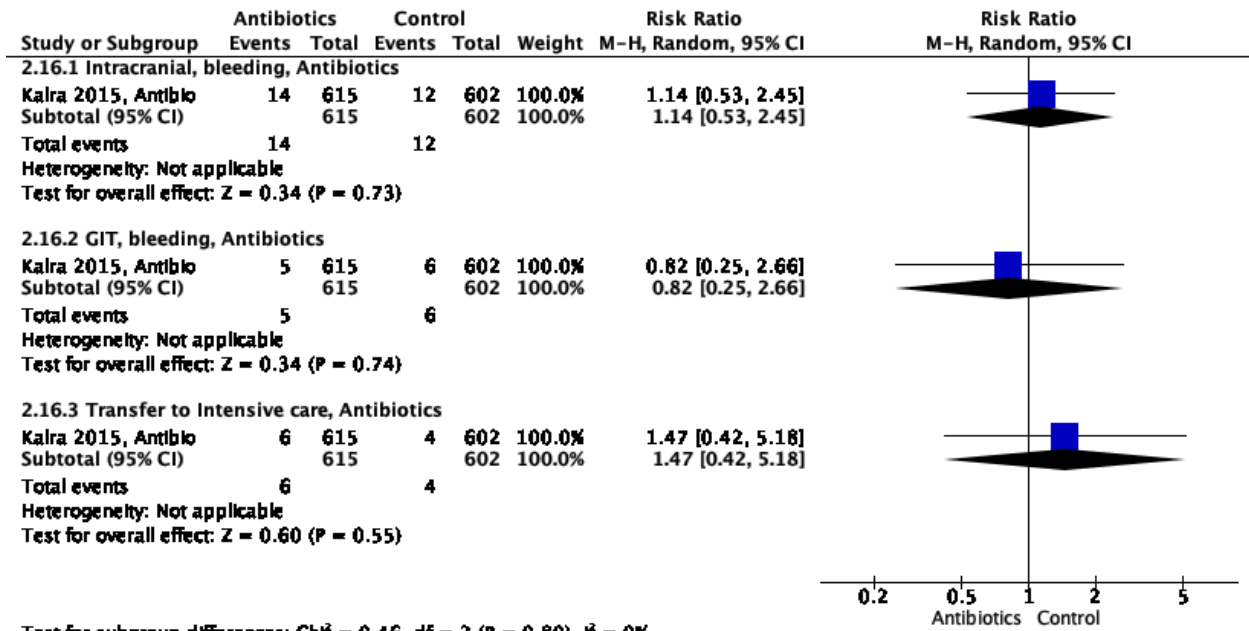

**Table 8: Effect of drugs on dysphagia score, swallowing and referred to PEG in patients with dysphagia after stroke**

| Outcome                          | Incidence %<br>Mean±SD |         | n (N) | RR [95% CI]/<br>MD [95% CI] | I <sup>2</sup> | P value     |
|----------------------------------|------------------------|---------|-------|-----------------------------|----------------|-------------|
|                                  | Drugs                  | Control |       |                             |                |             |
| <b>RBHOMS</b>                    |                        |         |       |                             |                |             |
| ACE inhibitors: RCT              |                        |         |       |                             |                |             |
| • Change                         | 0.5±1.5                | 0.6±1.5 | 1(48) | -0.10 [-0.96, 0.76]         | NA             | 0.82        |
| • Post intervention              | 4.2±1.5                | 3.5±1.5 | 1(48) | 0.70 [-0.16, 1.56]          | NA             | 0.11        |
| <b>PAS</b>                       |                        |         |       |                             |                |             |
| TRPV agonists: NRCT              |                        |         |       |                             |                |             |
| • Post intervention              | 1.9±0.3                | 2.7±0.4 | 1(40) | -0.61 [-0.76, -0.45]        | 98%            | 0.22        |
| <b>Improvement in swallowing</b> |                        |         |       |                             |                |             |
| Metoclopramide: RCT              | 66.7%                  | 36.7%   | 1(60) | 1.82 [1.07, 3.10]           | NA             | <b>0.03</b> |
| <b>Referred to PEG</b>           |                        |         |       |                             |                |             |
| Metoclopramide; RCT              | 23.3%                  | 40.0%   | 1(60) | 0.58 [0.27, 1.28]           | NA             | 0.18        |

a: Standard Mean Difference; ACE: Angiotensin converting enzyme; CI: Confidence intervals; I<sup>2</sup>, p: Heterogeneity; MD: Mean difference; n: Number of studies; N: Number of patients; NA: Not applicable; p: Statistical significance value; RBHOMS: Royal Brisbane Hospital Outcome; RR: Risk ratio; SD: Standard Deviation; TRPV: transient receptor potential vanilloid

**Figure 15: RBHOMS: Royal Brisbane Hospital Outcome in patients with dysphagia after stroke**

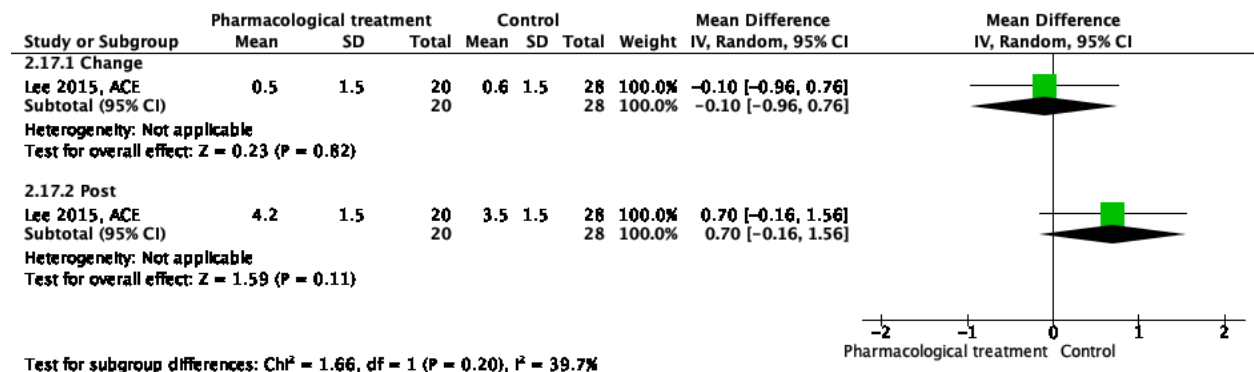

Fig 16: PAS with capsaicin in patients with dysphagia after stroke

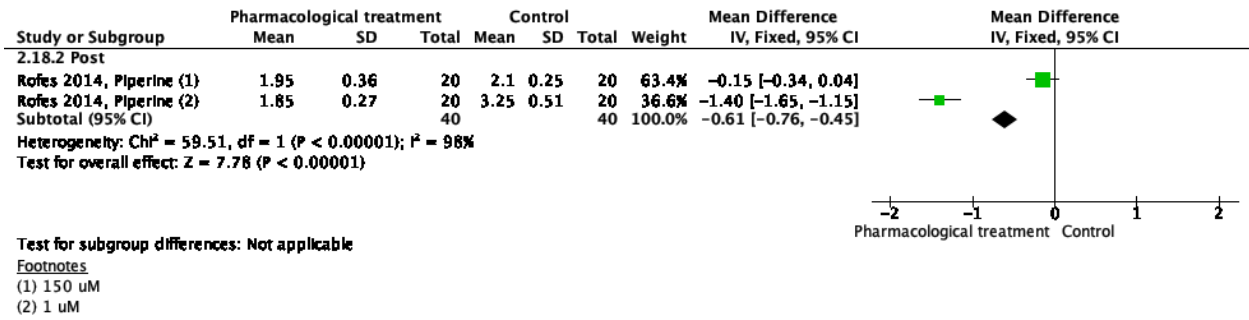

Figure 17: Improvement in swallowing with metoclopramide in patients with dysphagia after stroke

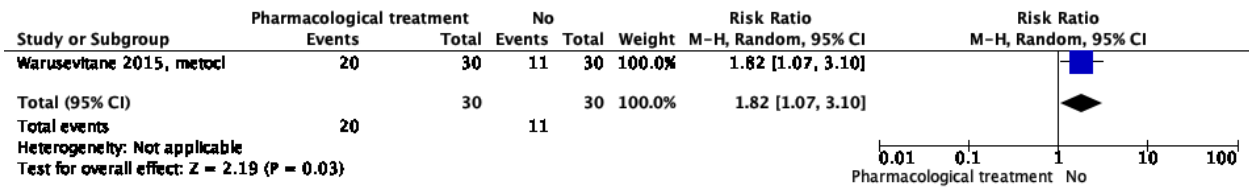

Figure 18: Referred to PEG with metoclopramide in patients with dysphagia after stroke

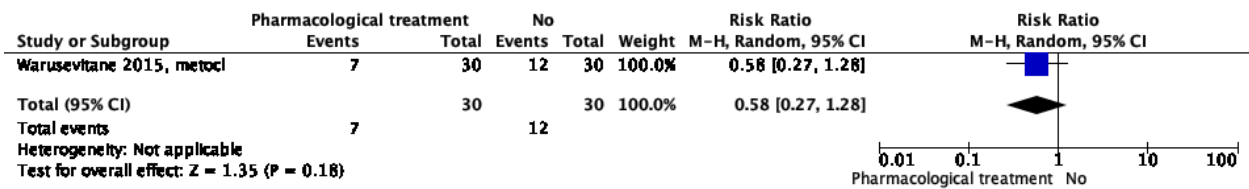

**Table 9: Effect of drugs on cough reflex, substance P levels in patients with dysphagia after stroke**

| Outcome                                        | Incidence, %<br>Mean±SD |          | n (N)  | RR [95% CI]/<br>MD [95% CI] | I <sup>2</sup> | P value  |
|------------------------------------------------|-------------------------|----------|--------|-----------------------------|----------------|----------|
|                                                | Drugs                   | Control  |        |                             |                |          |
| <b>Cough reflex sensitivity,<br/>log mg/mL</b> |                         |          |        |                             |                |          |
| TRPV agonists                                  |                         |          |        |                             |                |          |
| • Overall                                      | 1.1±0.3                 | 1.2±0.3  | 2(98)  | -0.10 [-0.15, -0.05]        | 0%             | <0.0001  |
| • RCT                                          | 1.3±0.1                 | 1.4±0.1  | 1(64)  | -0.10 [-0.15, -0.05]        | NA             | <0.0001  |
| • NRCT                                         | 0.8±0.6                 | 0.9±0.8  | 1(34)  | -0.10 [-0.58, 0.38]         | NA             | 0.68     |
| <b>Cough</b>                                   |                         |          |        |                             |                |          |
| Dopaminergic drugs: RCT                        | 56.0%                   | 55.1%    | 1(298) | 1.02 [0.82, 1.26]           | NA             | 0.88     |
| <b>Substance P levels</b>                      |                         |          |        |                             |                |          |
| ACE inhibitors                                 |                         |          |        |                             |                |          |
| • Change from baseline                         |                         |          |        |                             |                |          |
| ○ Overall                                      | 39.2±6.9                | -2.0±1.0 | 3(80)  | 39.12 [23.30, 54.95]        | 98%            | <0.00001 |
| ○ RCT                                          | 36.6±6.7                | -1.1±1.1 | 2(54)  | 32.12 [8.79, 55.44]         | 99%            | 0.007    |
| ○ NRCT                                         | 50.5±8.0                | -2.7±1.0 | 1(26)  | 53.20 [48.22, 58.18]        | NA             | <0.00001 |
| • Post intervention                            |                         |          |        |                             |                |          |
| ○ Overall                                      | 65.3±6.9                | 24.2±1.0 | 3(80)  | 38.99 [23.26, 54.72]        | 98%            | <0.00001 |
| ○ RCT                                          | 62.7±6.7                | 25.3±1.1 | 2(54)  | 31.92 [8.99, 54.85]         | 98%            | 0.006    |
| ○ NRCT                                         | 76.5±8.0                | 23.3±1.0 | 1(26)  | 53.20 [48.22, 58.18]        | NA             | <0.00001 |
| TRPV agonist                                   |                         |          |        |                             |                |          |
| • Change from<br>baseline, RCT                 | 5.5±10.6                | -3.4±8.7 | 1(70)  | 8.90 [4.36, 13.44]          | NA             | 0.00001  |
| • Post intervention<br>from baseline, RCT      | 40.8±10.6               | 30.9±8.7 | 1(70)  | 9.90 [5.36, 14.44]          | NA             | <0.0001  |

ACE: Angiotensin converting enzyme; CI: Confidence intervals; I<sup>2</sup>, p: Heterogeneity; MD: Mean difference; n: Number of studies; N: Number of patients; NA: Not applicable; p: Statistical significance value; RR: Risk ratio; SD: Standard Deviation; TRPV: transient receptor potential vanilloid

Fig 19: Cough reflex sensitivity, log mg/mL in patients with dysphagia after stroke

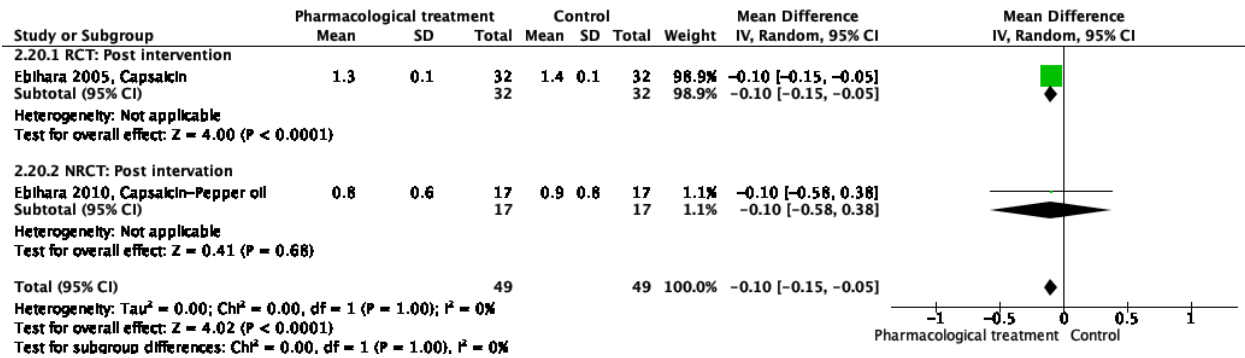

Fig 20: Substance P levels with ACE inhibitors in patients with dysphagia after stroke

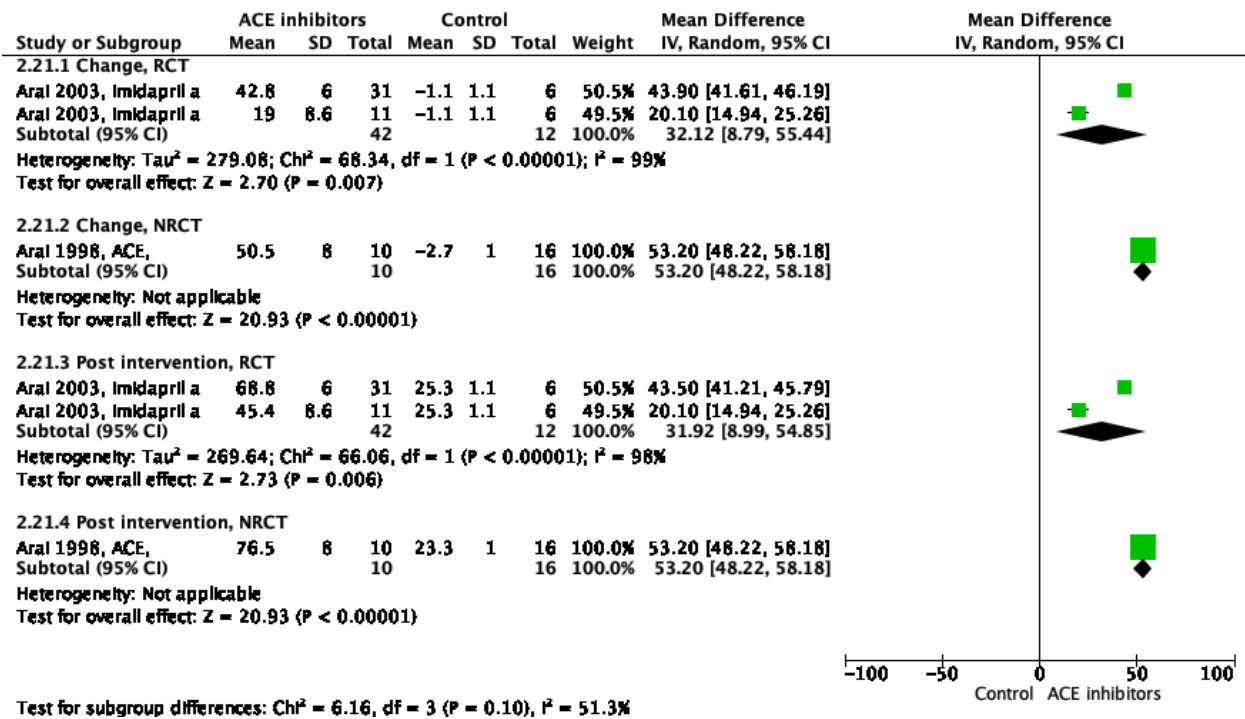

Fig 21: Cough with dopaminergic drugs in patients with dysphagia after stroke

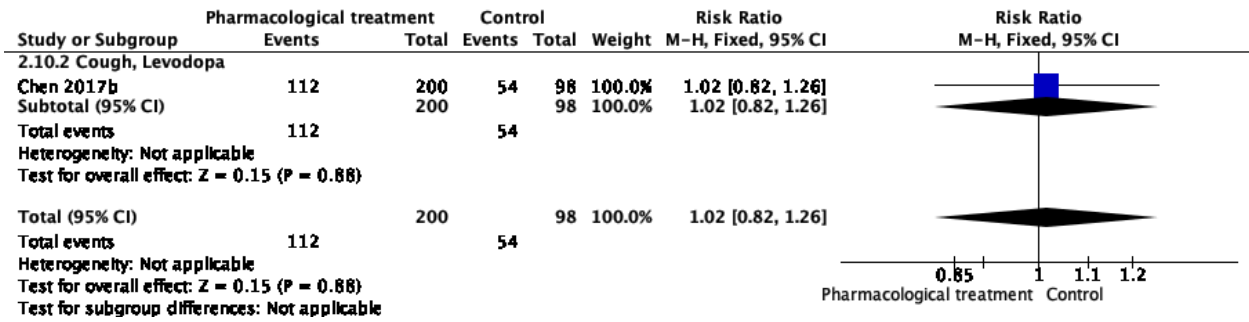

Fig 22: Substance P levels with TRPV agonist in patients with dysphagia after stroke

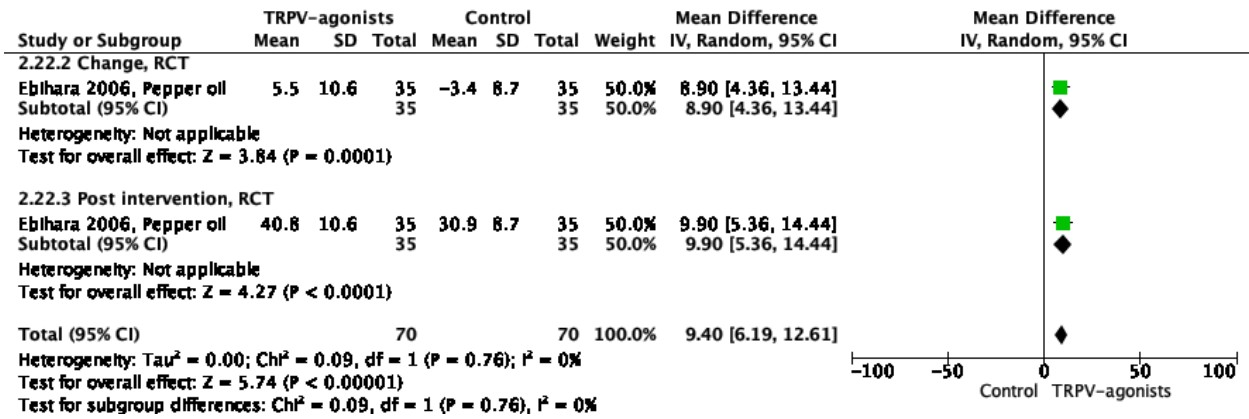



**Table 10: Effect of drugs on NIHSS, Mini-mental state examination, quality of life, anxiety and depression in patients with dysphagia after stroke**

| Outcome                              | Incidence %<br>Mean±SD |          | n (N)   | RR [95% CI]/<br>MD [95% CI] | I <sup>2</sup> | P value |
|--------------------------------------|------------------------|----------|---------|-----------------------------|----------------|---------|
|                                      | Drugs                  | Control  |         |                             |                |         |
| <b>NIHSS</b>                         |                        |          |         |                             |                |         |
| • Antibiotics: RCT                   | 11.7±8.1               | 10.1±7.7 | 1(1217) | 1.60 [0.71, 2.49]           | NA             | 0.0004  |
| <b>Mini-mental state examination</b> |                        |          |         |                             |                |         |
| • TRPV agonist: RCT                  | 11.2±7.7               | 12.4±7.3 | 1(70)   | -1.20 [-4.72, 2.32]         | NA             | 0.50    |
| <b>EUR, Quality of life</b>          |                        |          |         |                             |                |         |
| <b>Problem with mobility</b>         |                        |          |         |                             |                |         |
| • Antibiotics: RCT                   | 70.3%                  | 69.2%    | 1(839)  | 1.02 [0.93, 1.11]           | NA             | 0.72    |
| <b>Problem with selfcare</b>         |                        |          |         |                             |                |         |
| • Antibiotics: RCT                   | 71.0%                  | 69.9%    | 1(839)  | 1.02 [0.93, 1.11]           | NA             | 0.71    |
| <b>Problem with usual activities</b> |                        |          |         |                             |                |         |
| • Antibiotics: RCT                   | 85.3%                  | 85.8%    | 1(833)  | 0.99 [0.94, 1.05]           | NA             | 0.83    |
| <b>Pain or discomfort</b>            |                        |          |         |                             |                |         |
| • Antibiotics: RCT                   | 53.6%                  | 49.5%    | 1(823)  | 1.08 [0.95, 1.24]           | NA             | 0.24    |
| <b>Anxiety or depression</b>         |                        |          |         |                             |                |         |
| • Antibiotics: RCT                   | 53.0%                  | 51.6%    | 1(813)  | 1.03 [0.90, 1.17]           | NA             | 0.68    |

CI: Confidence intervals; I<sup>2</sup>, p: Heterogeneity; MD: Mean difference; n: Number of studies; N: Number of patients; NA: Not applicable; p: Statistical significance value; RR: Risk ratio; SD: Standard Deviation

**Figure 23: NIHSS, Mini mental state examination, number of swallows per min in patients with dysphagia after stroke**

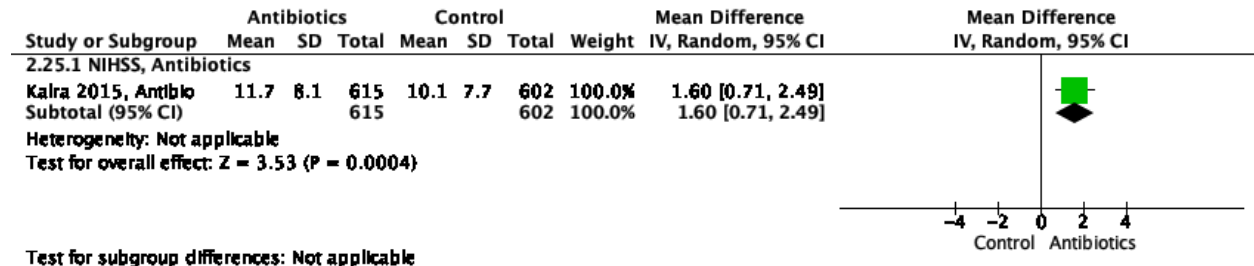

Fig 24: Mini-mental state examination in patients with dysphagia after stroke

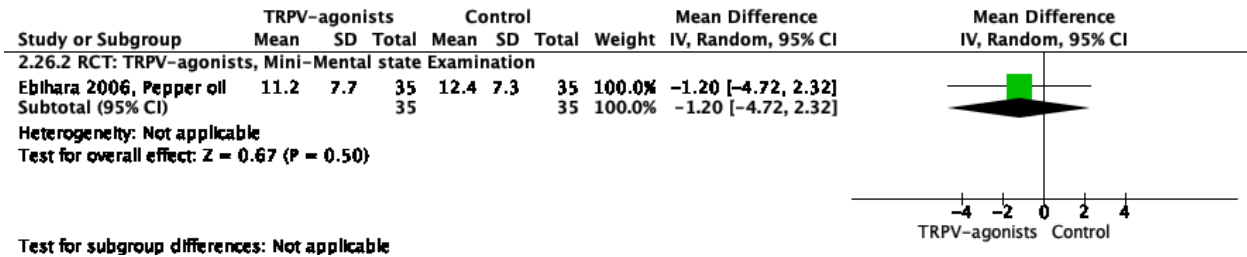

Test for subgroup differences: Not applicable

Fig 25: EUR QoL, anxiety and depression with the use of antibiotics in patients with dysphagia after stroke

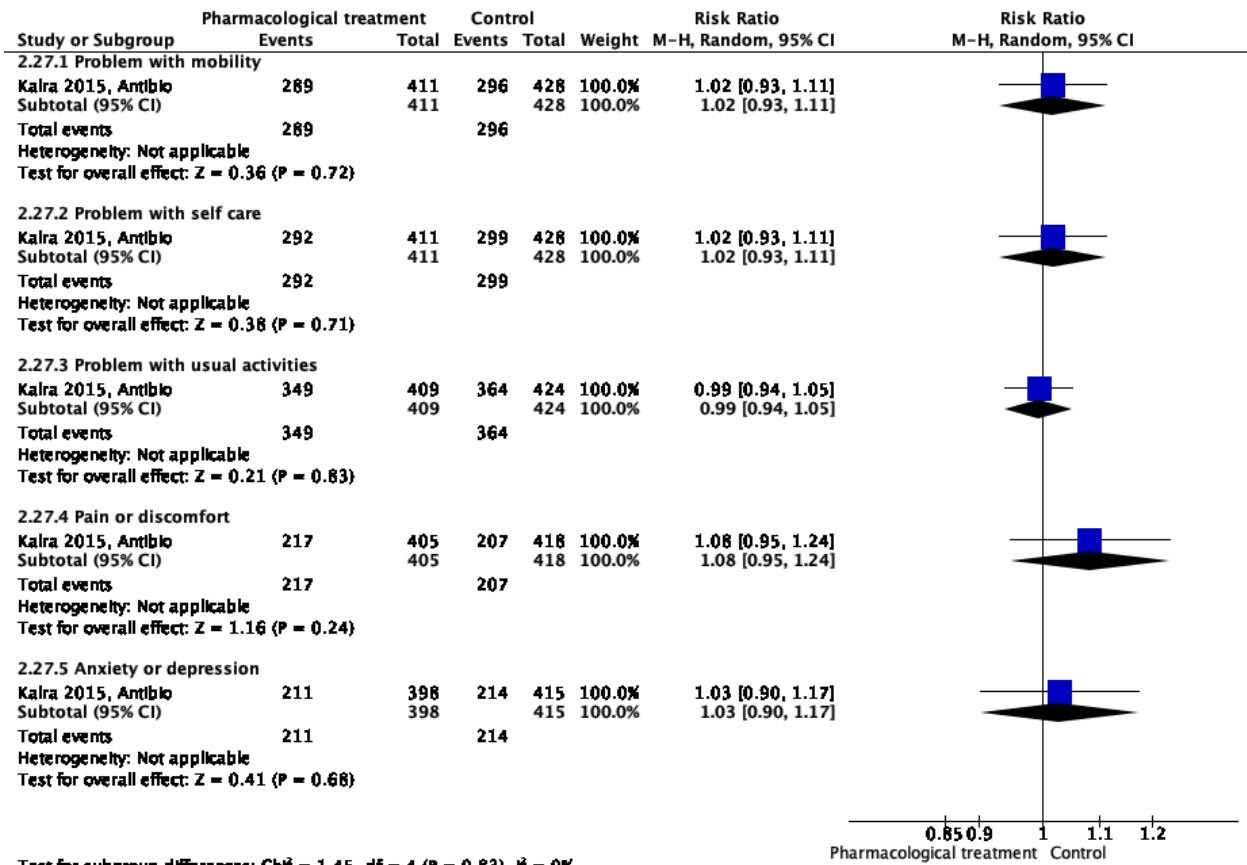

**Table 11: Effect of drugs on length of stay, time to infection and number of febrile days in patients with dysphagia after stroke**

| Outcome                                 | Mean±SD  |          | n (N)   | MD [95% CI]           | I <sup>2</sup> | P value  |
|-----------------------------------------|----------|----------|---------|-----------------------|----------------|----------|
|                                         | Drugs    | Control  |         |                       |                |          |
| <b>Length of stay in hospital, days</b> |          |          |         |                       |                |          |
| • ACE inhibitor: RCT                    | 37±22    | 51±36    | 1(68)   | -14.00 [-28.09, 0.09] | NA             | 0.05     |
| • Dopaminergic: RCT                     | 37±22    | 51±36    | 1(68)   | -14.00 [-28.09, 0.09] | NA             | 0.05     |
| • Antibiotics: RCT                      | 12.5±5.9 | 10.2±5.8 | 2(3755) | 3.49 [-3.37, 10.35]   | 100%           | 0.32     |
| <b>Time to first infection</b>          |          |          |         |                       |                |          |
| • Antibiotics: RCT                      | 3.9±3.7  | 3.6±3.1  | 2(196)  | 0.76 [-1.30, 2.82]    | 81%            | 0.47     |
| <b>Number of febrile days</b>           |          |          |         |                       |                |          |
| • TRPV agonist: NRCT                    | 1.3±1.7  | 6.8±4.7  | 1(34)   | -5.50 [-7.88, -3.12]  | NA             | <0.00001 |

ACE: Angiotensin converting enzyme; CI: Confidence intervals; I<sup>2</sup>, p: Heterogeneity; MD: Mean difference; n: Number of studies; N: Number of patients; NA: Not applicable; p: Statistical significance value; SD: Standard deviation; TRPV: transient receptor potential vanilloid

**Fig 26: Length of stay in hospital in patients with dysphagia after stroke**

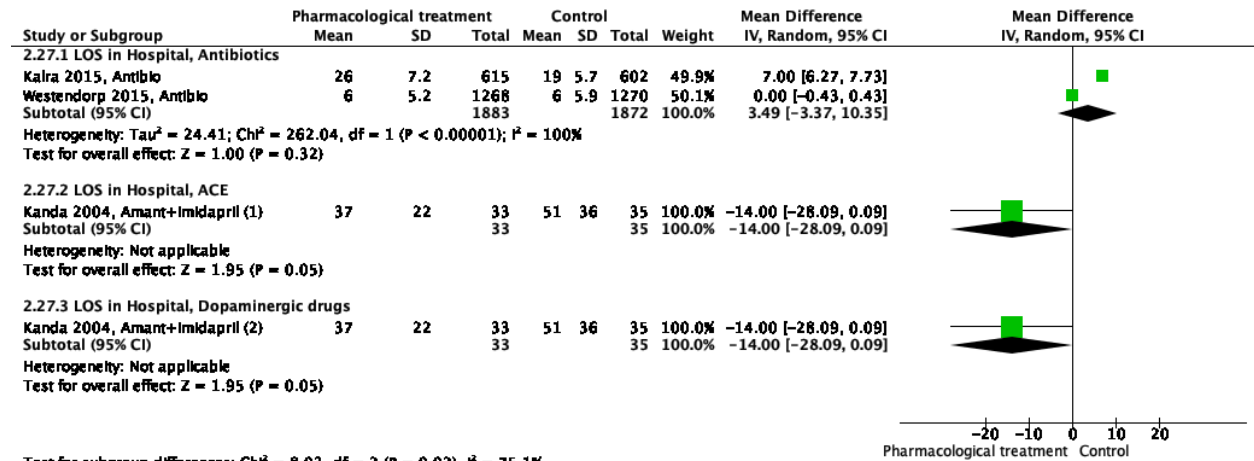

**Footnotes**

- (1) Use of antibiotics 17 vs 39 days, p<0.01
- (2) Use of antibiotics 17 vs 39 days, p<0.01

Fig 27: Time to first infection in patients with dysphagia after stroke

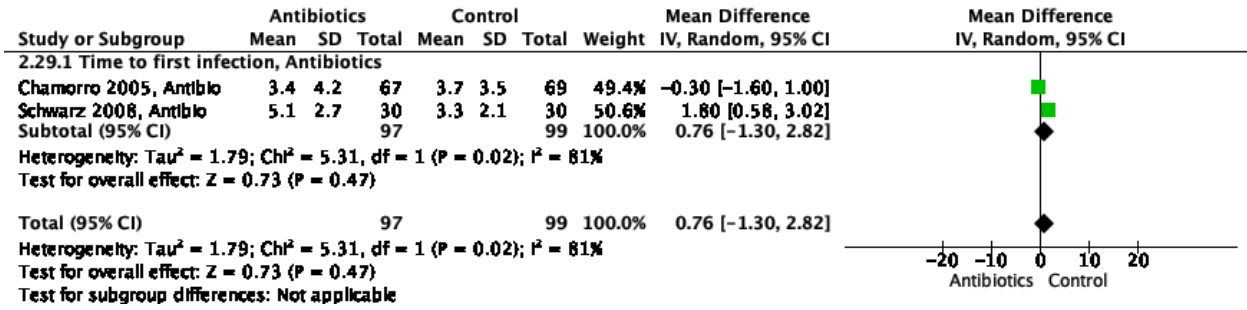

Fig 28: Number of febrile days in patients with dysphagia after stroke

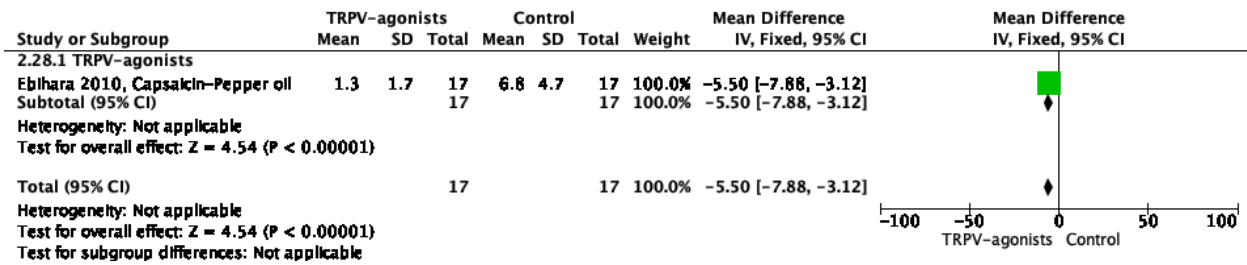

**Table 12: Effect of drugs on length of stay and timing of swallowing in patients with dysphagia after stroke**

| Outcome                                                | Incidence %<br>Mean±SD |           | n (N)  | RR [95% CI]/<br>MD [95% CI] | I <sup>2</sup> | P value  |
|--------------------------------------------------------|------------------------|-----------|--------|-----------------------------|----------------|----------|
|                                                        | Drugs                  | Control   |        |                             |                |          |
| <b>Aspiration</b>                                      |                        |           |        |                             |                |          |
| ACE inhibitors: RCT                                    | 26.2%                  | 91.7%     | 1(54)  | 0.29 [0.17, 0.49]           | NA             | <0.00001 |
| Dopaminergic drugs: RCT                                | 25.9%                  | 91.7%     | 1(39)  | 0.30 [0.16, 0.58]           | 0%             | 0.0003   |
| <b>Latency of swallowing reflex</b>                    |                        |           |        |                             |                |          |
| TRPV agonist                                           |                        |           |        |                             |                |          |
| • Change                                               |                        |           |        |                             |                |          |
| ○ Overall                                              | -7.4±1.2               | -0.5±7.2  | 3(174) | -5.14 [-7.86, -2.41]        | 100%           | 0.80     |
| ○ RCT                                                  | -7.9±1.5               | -0.6±9.4  | 2(134) | -6.68 [-15.75, 2.39]        | 90%            | 0.15     |
| ○ NRCT                                                 | -5.5±0.0               | 0.0±0.01  | 1(40)  | -5.50 [-5.50, -5.50]        | NA             | <0.00001 |
| • Post intervention                                    |                        |           |        |                             |                |          |
| ○ Overall                                              | 7.3±6.0                | 12.0±12.2 | 3(168) | -4.54 [-10.86, 1.77]        | 72%            | 0.16     |
| ○ RCT                                                  | 4.0±1.5                | 10.2±9.4  | 2(134) | -5.54 [-13.11, 2.02]        | 86%            | 0.15     |
| ○ NRCT                                                 | 20.6±23.9              | 18.9±23.4 | 1(34)  | 1.70 [-14.20, 17.60]        | NA             | 0.83     |
| <b>Upper oesophageal sphincter opening time, sec</b>   |                        |           |        |                             |                |          |
| • TRPV agonist                                         | 0.9±0.1                | 1.0±0.0   | 2(50)  | -0.08 [-0.13, -0.04]        | 41%            | 0.0002   |
| <b>Laryngeal vestibule closure time, sec</b>           |                        |           |        |                             |                |          |
| • TRPV agonist                                         | 0.3±0.0                | 0.4±0.0   | 3(116) | -0.10 [-0.12, -0.08]        | 70%            | <0.00001 |
| <b>Hyoid bone maximum anterior extension time, sec</b> |                        |           |        |                             |                |          |
| • TRPV agonist                                         | 0.5±0.0                | 0.6±0.1   | 3(146) | -0.15 [-0.16, -0.13]        | 0%             | <0.00001 |
| <b>Bolus velocity</b>                                  |                        |           |        |                             |                |          |
| • TRPV agonist                                         | 0.3±0.0                | 0.3±0.0   | 3(146) | 0.04 [0.01, 0.08]           | 96%            | 0.02     |
| <b>Swallowing reflex (sec)</b>                         |                        |           |        |                             |                |          |
| • Dopaminergic drugs:                                  | 2.9±0.8                | 8.3±1.2   | 1(54)  | -5.40 [-5.94, -             | NA             | <0.00001 |

| Outcome                     | Incidence %<br>Mean±SD |          | n (N) | RR [95% CI]/<br>MD [95% CI] | I <sup>2</sup> | P value  |
|-----------------------------|------------------------|----------|-------|-----------------------------|----------------|----------|
|                             | Drugs                  | Control  |       |                             |                |          |
| RCT                         |                        |          |       | 4.86]                       |                |          |
| <b>Swallows/min</b>         |                        |          |       |                             |                |          |
| • TRPV agonist              |                        |          |       |                             |                |          |
| • Change: RCT               | 3.3±2.5                | 0.0±0.05 | 1(70) | 3.30 [2.47, 4.13]           | NA             | <0.00001 |
| • Post intervention:<br>RCT | 3.7±2.5                | 0.5±0.5  | 1(70) | 3.20 [2.36, 4.04]           | NA             | <0.00001 |

a: Standard Mean Difference; ACE: Angiotensin converting enzyme; CI: Confidence intervals; I<sup>2</sup>, p: Heterogeneity; MD: Mean difference; n: Number of studies; N: Number of patients; NA: Not applicable; p: Statistical significance value; RR: Risk ratio; TRPV: transient receptor potential vanilloid

**Figure 29: Aspiration with ACE inhibitors and dopaminergic drugs in patients with dysphagia after stroke**

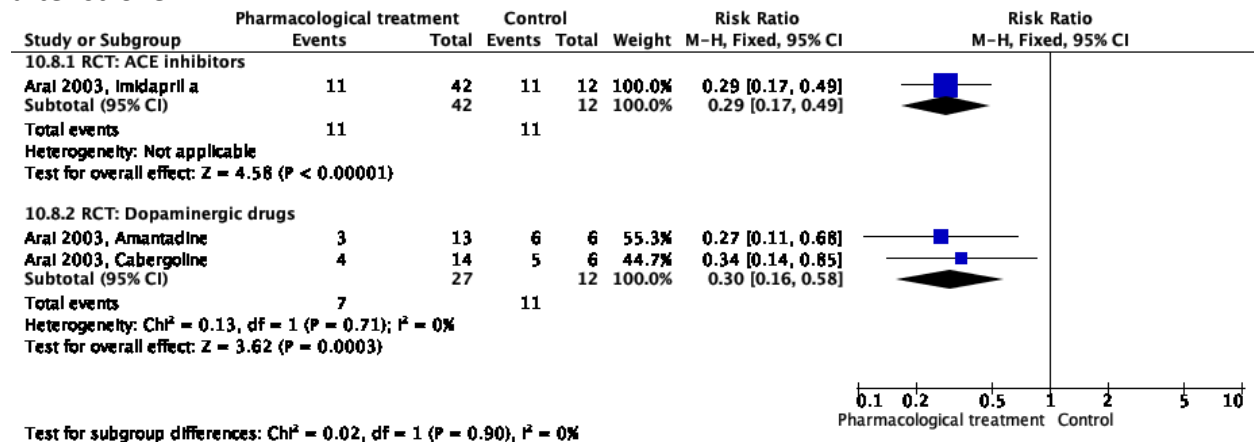

Figure 30: Latency of swallowing reflex with TRPV agonist in patients with dysphagia after stroke

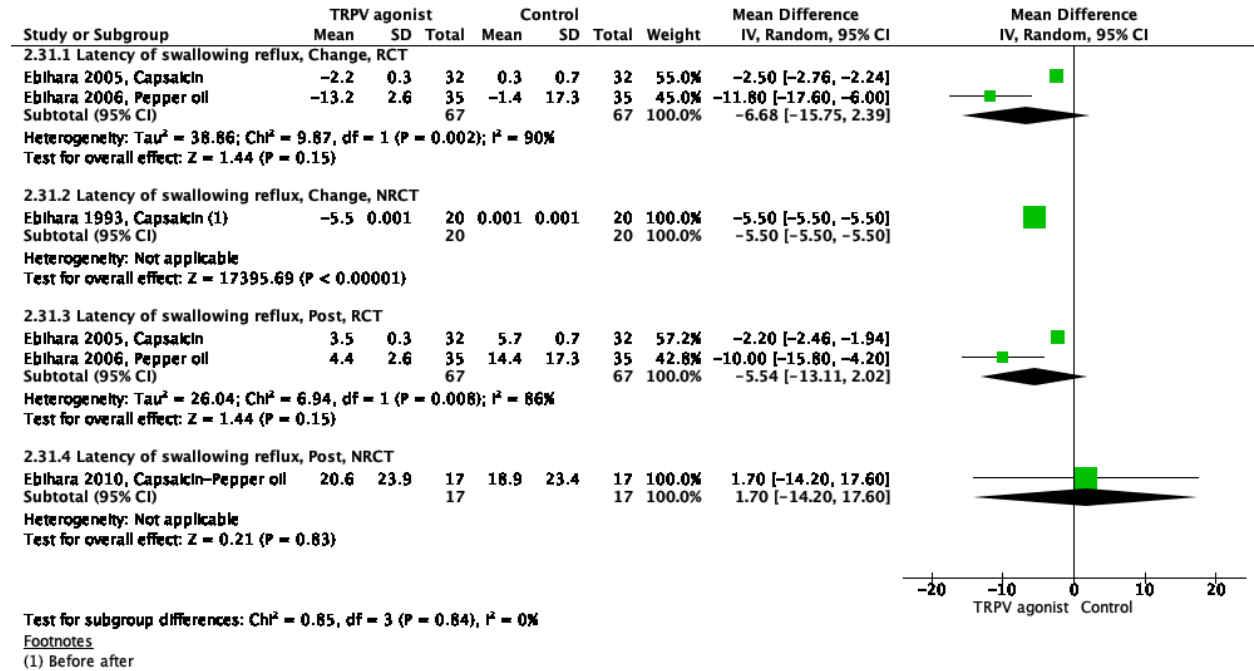

Fig 31: Effect of TRPV on swallow timing in patients with dysphagia after stroke

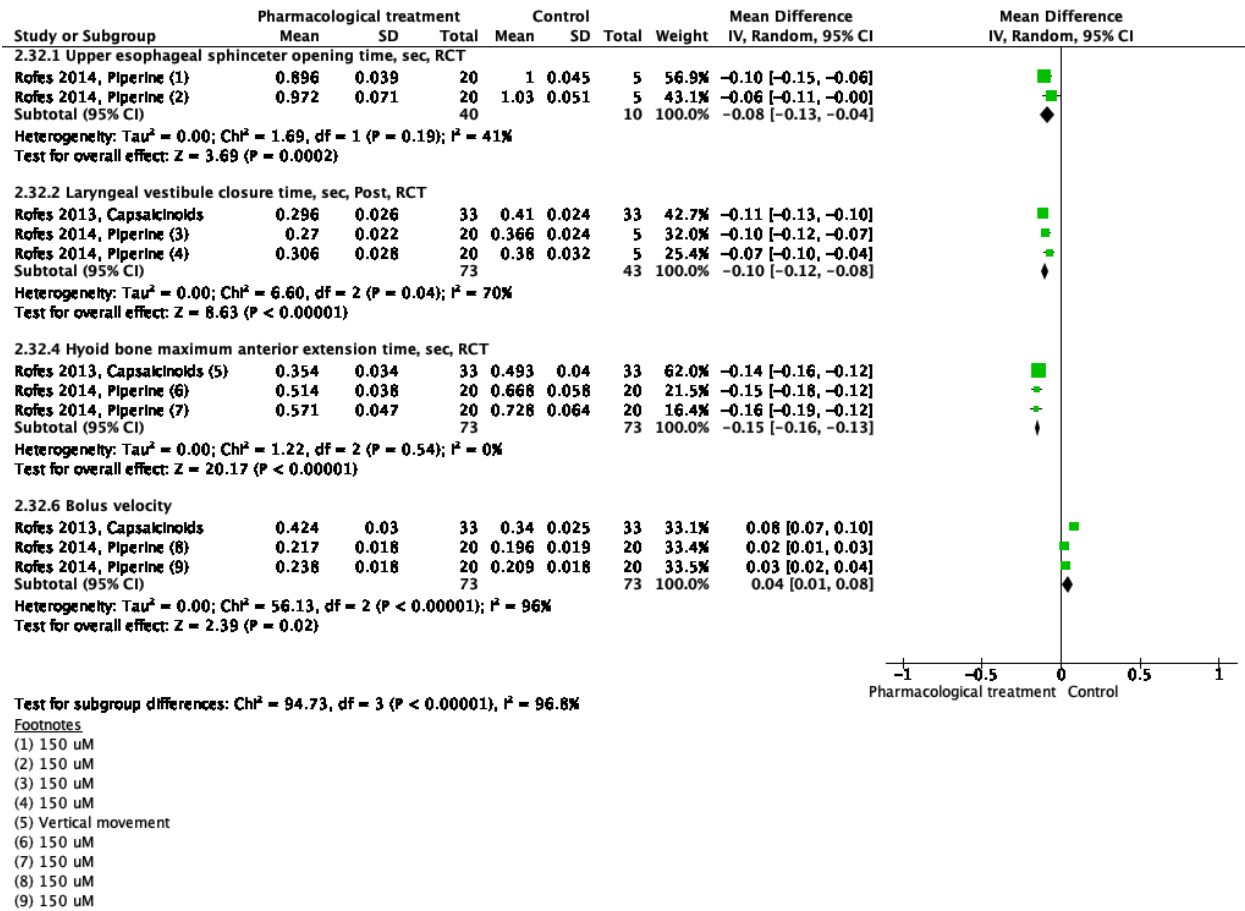

Fig 32: Latency of swallowing reflex (sec) in patients with dysphagia after stroke

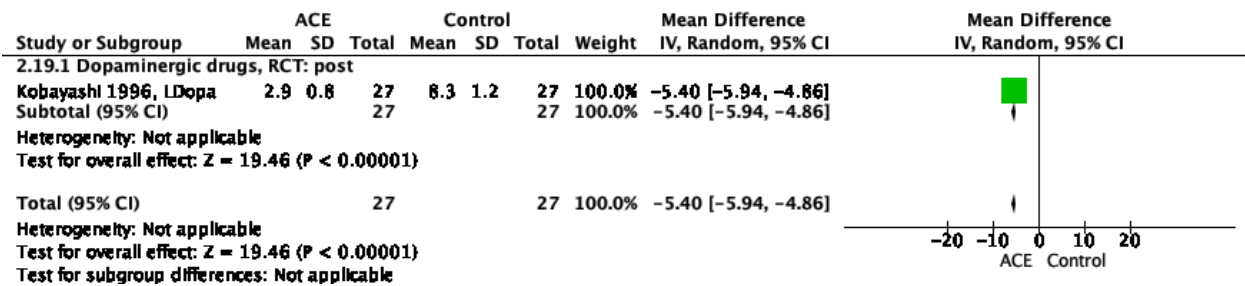



Fig 33: Swallow per min with TRPV agonist in patients with dysphagia after stroke

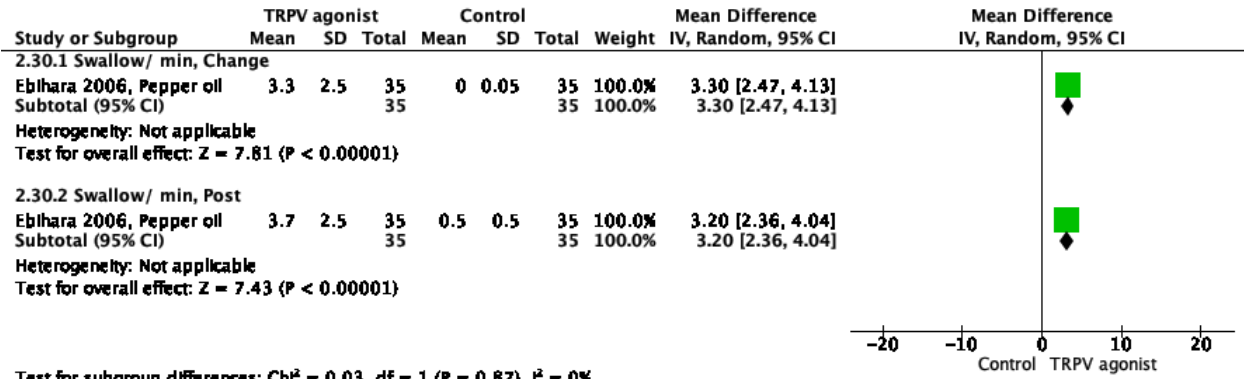

## Treatment 6 - Neurostimulation

Table 1: Effect of stimulation on dysphagia score in patients with dysphagia after stroke

| Outcome                                  | Mean±SD     |          | n (N)   | SMD [95% CI]         | I <sup>2</sup> | P value  |
|------------------------------------------|-------------|----------|---------|----------------------|----------------|----------|
|                                          | Stimulation | Control  |         |                      |                |          |
| <b>Improvement in dysphagia score</b>    |             |          |         |                      |                |          |
| TES                                      |             |          |         |                      |                |          |
| • Overall                                | 5.8±2.7     | 3.5±2.6  | 22(868) | 0.90 [0.62, 1.18]    | 69%            | <0.00001 |
| • RCT                                    | 6.2±2.8     | 3.7±2.7  | 19(746) | 0.90 [0.60, 1.19]    | 70%            | <0.00001 |
| • NRCT                                   | 3.7±1.9     | 1.8±1.9  | 3(122)  | 1.14 [-0.13, 2.41]   | 78%            | 0.08     |
| rTMS                                     |             |          |         |                      |                |          |
| • Overall                                | 9.6±6.1     | 4.7±5.1  | 11(236) | 1.33 [0.51, 2.16]    | 85%            | 0.002    |
| • RCT                                    | 10.5±6.4    | 5.3±5.5  | 10(212) | 1.51 [0.60, 2.42]    | 85%            | 0.001    |
| • NRCT                                   | 0.8±2.6     | 0.7±2.5  | 1(24)   | 0.04 [-0.76, 0.84]   | NA             | 0.93     |
| tDCS                                     |             |          |         |                      |                |          |
| • Overall                                | 2.8±2.3     | 2.0±1.8  | 8(196)  | 0.75 [0.38, 1.12]    | 26%            | <0.0001  |
| • RCT                                    | 2.8±2.3     | 2.0±1.8  | 8(196)  | 0.75 [0.38, 1.12]    | 26%            | <0.0001  |
| PES, Non-tracheostomized                 |             |          |         |                      |                |          |
| • Overall                                | 2.3±1.9     | 1.6±2.2  | 5(204)  | 0.77 [-0.06, 1.60]   | 80%            | 0.07     |
| • RCT                                    | 2.3±1.9     | 1.6±2.2  | 5(204)  | 0.77 [-0.06, 1.60]   | 80%            | 0.07     |
| PES, tracheostomized                     |             |          |         |                      |                |          |
| • Overall                                | 5.6±3.9     | 5.2±4.3  | 2(83)   | 0.25 [-0.19, 0.69]   | 0%             | 0.27     |
| • RCT                                    | 5.6±3.9     | 5.2±4.3  | 2(83)   | 0.25 [-0.19, 0.69]   | 0%             | 0.27     |
| <b>Post-intervention dysphagia score</b> |             |          |         |                      |                |          |
| TES                                      |             |          |         |                      |                |          |
| • Overall                                | 8.2±2.8     | 12.1±3.1 | 21(869) | -1.03 [-1.41, -0.66] | 83%            | <0.00001 |
| • RCT                                    | 9.2±3.0     | 12.6±3.2 | 19(759) | -1.00 [-1.37, -0.63] | 80%            | <0.00001 |
| • NRCT                                   | 2.9±1.8     | 6.6±2.1  | 2(110)  | -1.16 [-3.50, 1.18]  | 94%            | 0.33     |
| rTMS                                     |             |          |         |                      |                |          |
| • Overall                                | 14.5±6.3    | 16.2±5.5 | 11(232) | -1.71 [-2.75, -0.66] | 89%            | 0.001    |
| • RCT                                    | 15.7±6.7    | 18.1±5.9 | 10(208) | -1.96 [-3.14, -0.78] | 90%            | 0.001    |
| • NRCT                                   | 2.5±2.6     | 2.6±2.5  | 1(24)   | -0.04 [-0.84, 0.76]  | NA             | 0.93     |
| tDCS                                     |             |          |         |                      |                |          |
| • Overall                                | 3.7±3.2     | 5.4±3.7  | 4(122)  | -0.29 [-0.92, 0.33]  | 61%            | 0.36     |
| • RCT                                    | 3.7±3.2     | 5.4±3.7  | 4(122)  | -0.29 [-0.92, 0.33]  | 61%            | 0.36     |
| PES, Non-tracheostomized                 |             |          |         |                      |                |          |
| • Overall                                | 3.9±3.0     | 4.8±3.0  | 4(201)  | -0.22 [-0.70, 0.25]  | 49%            | 0.35     |
| • RCT                                    | 3.9±3.0     | 4.8±3.0  | 4(201)  | -0.22 [-0.70, 0.25]  | 49%            | 0.35     |

|                         |         |         |       |                     |     |      |
|-------------------------|---------|---------|-------|---------------------|-----|------|
| PES,<br>tracheostomized |         |         |       |                     |     |      |
| • Overall               | 4.8±3.9 | 6.2±4.3 | 2(83) | -0.68 [-1.69, 0.33] | 76% | 0.19 |
| • RCT                   | 4.8±3.9 | 6.2±4.3 | 2(83) | -0.68 [-1.69, 0.33] | 76% | 0.19 |

CI: Confidence intervals; tDCS: transcranial Direct Current Stimulation;  $I^2$ : Heterogeneity; n: Number of studies; N: Number of patients; NMES: Neuromuscular Electrical Stimulation; NRCT: RCT: Non-randomized controlled trial (Cohort, before after, case-control studies); p: Statistical significance value; PES: Pharyngeal Electrical Stimulation; RCT: Randomized controlled trial; SD: Standard Deviation; SMD: Standard Mean Difference; rTMS: repetitive Transcranial Magnetic Stimulation

Figure 1: Improvement in dysphagia score with different stimulations in patients with dysphagia after stroke

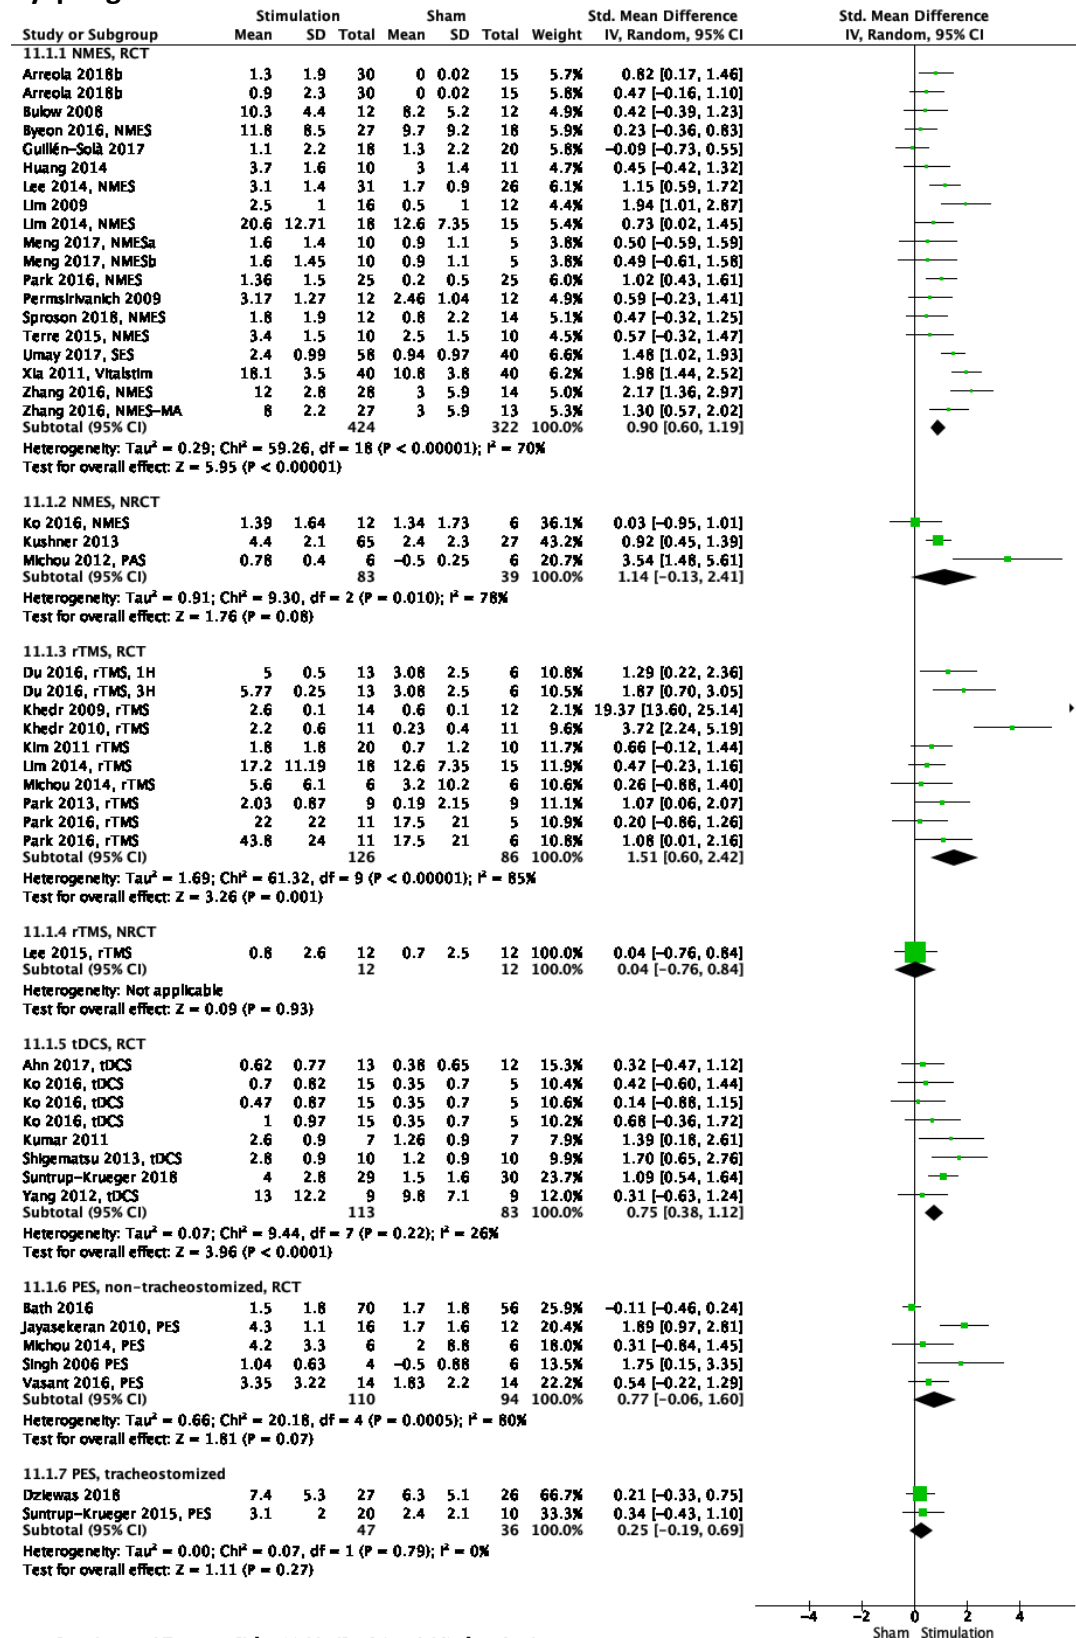

Figure 2: Dysphagia score after different stimulations in patients with dysphagia after stroke

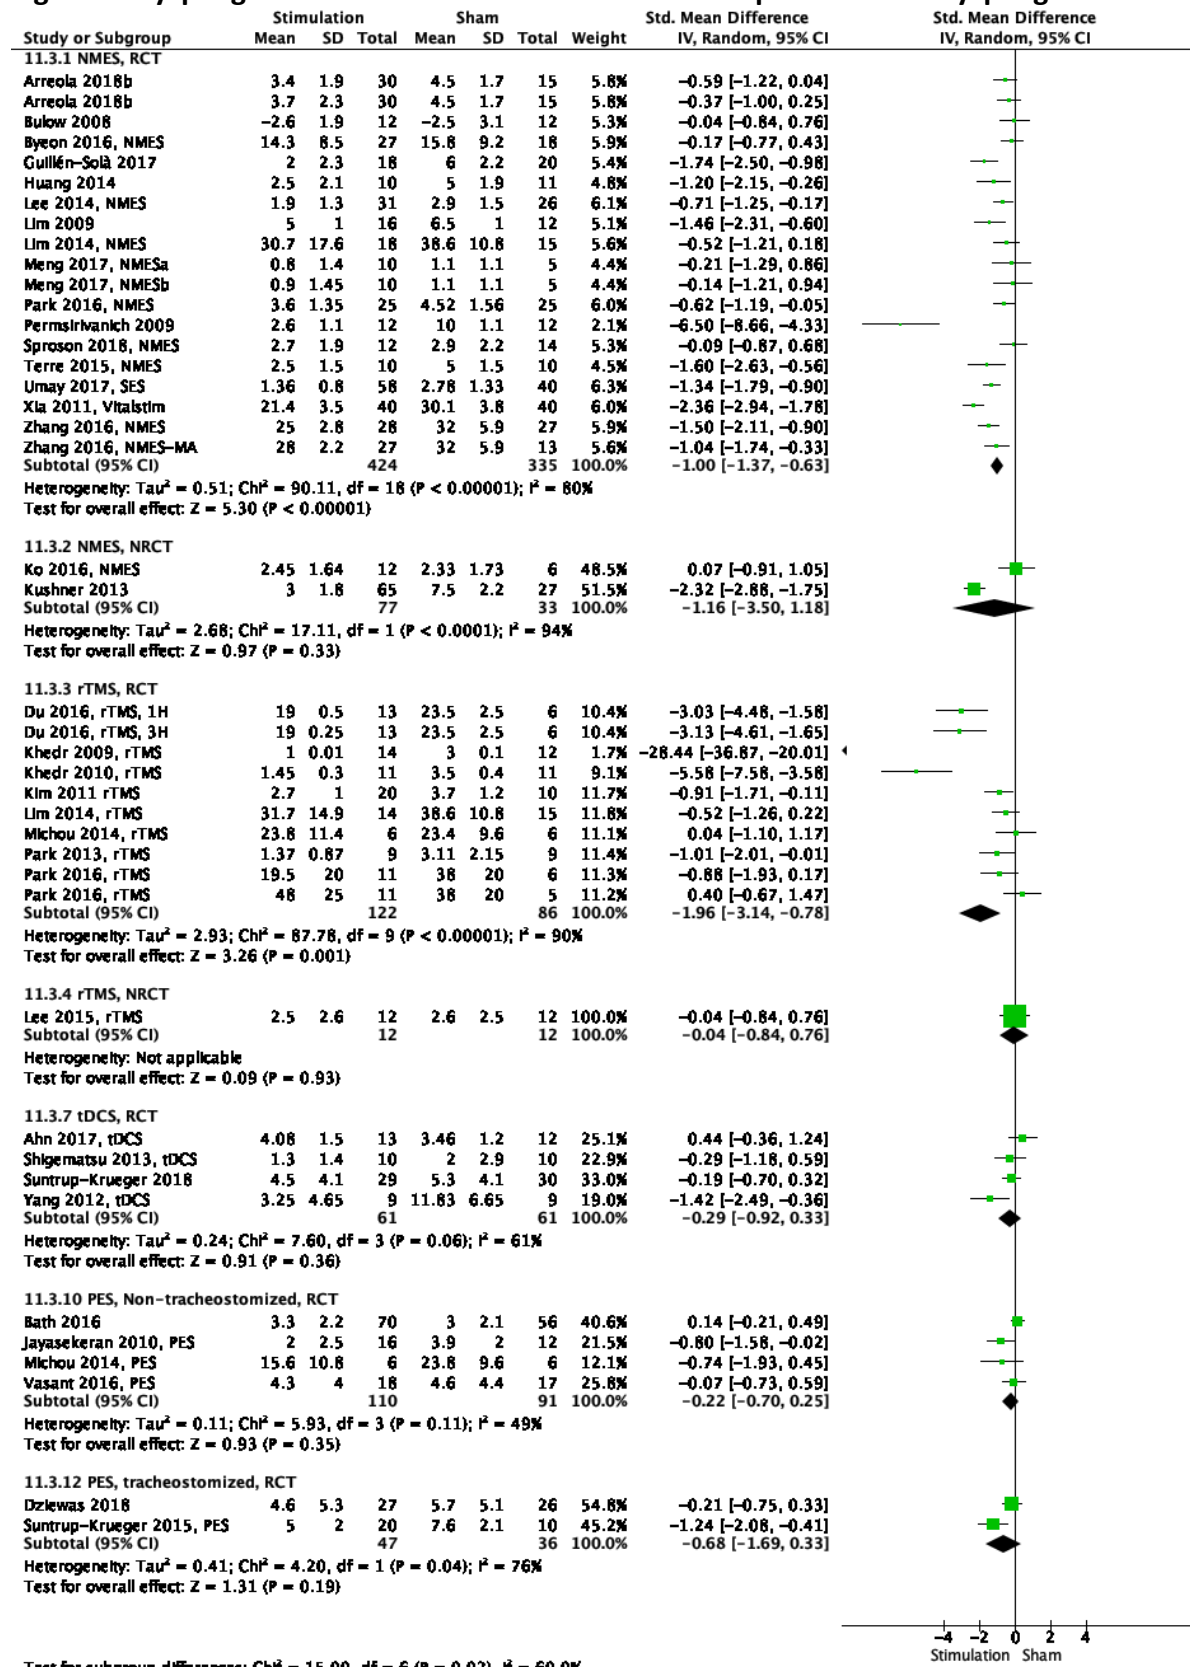

**Table 2: Effect of stimulation on dysphagia score of increasing-order<sup>a</sup> in patients with dysphagia after stroke**

| Outcome                      | Mean±SD     |           | n (N)   | MD [95% CI]           | I <sup>2</sup> | P value   |
|------------------------------|-------------|-----------|---------|-----------------------|----------------|-----------|
|                              | Stimulation | Control   |         |                       |                |           |
| <b>DSRS</b>                  |             |           |         |                       |                |           |
| • Change, RCT                | -3.7±2.7    | -2.0±2.3  | 9(380)  | -2.00 [-2.08, -1.93]  | 0%             | < 0.00001 |
| • Post-intervention, RCT     | 3.4±3.6     | 4.3±3.6   | 8(352)  | -1.97 [-2.16, -1.78]  | 23%            | < 0.00001 |
| <b>FEDSS</b>                 |             |           |         |                       |                |           |
| • Change, RCT                | -2.1±1.0    | -0.8±0.9  | 2(157)  | -1.14 [-1.79, -0.49]  | 78%            | 0.0005    |
| • Post-intervention, RCT     | 1.7±1.0     | 2.7±1.4   | 2(157)  | -0.96 [-1.96, 0.03]   | 79%            | 0.06      |
| <b>FDS</b>                   |             |           |         |                       |                |           |
| • Change, overall            | -11.3±10.3  | -7.1±9.0  | 9(231)  | -2.37 [-4.51, -0.23]  | 0%             | 0.03      |
| • Change, RCT                | -11.6±9.8   | -7.0±6.7  | 7(189)  | -2.39 [-4.58, -0.19]  | 0%             | 0.03      |
| • Change, NRCT               | -10.4±12.5  | -7.3±18.4 | 2(42)   | -2.09 [-11.74, 7.55]  | 0%             | 0.67      |
| • Post-intervention, overall | 18.1±12.3   | 19.9±12.0 | 9(227)  | -3.64 [-5.77, -1.51]  | 0%             | 0.0008    |
| • Post-intervention, RCT     | 18.5±12.2   | 20.8±10.5 | 7(185)  | -3.79 [-5.97, -1.61]  | 0%             | 0.0007    |
| • Post-intervention, NRCT    | 16.3±12.5   | 16.4±18.4 | 2(42)   | -0.73 [-10.38, 8.91]  | 0%             | 0.88      |
| <b>PAS</b>                   |             |           |         |                       |                |           |
| • Change, overall            | -1.7±2.0    | -0.9±1.8  | 21(606) | -1.19 [-1.72, -0.66]  | 79%            | < 0.0001  |
| • Change, RCT                | -1.8±2.0    | -0.9±1.8  | 18(552) | -1.28 [-1.94, -0.61]  | 82%            | < 0.00001 |
| • Change, NRCT               | -1.0±1.8    | -0.6±1.7  | 3(54)   | -0.87 [-1.73, -0.01]  | 36%            | 0.05      |
| • Post-intervention, overall | 3.9±2.3     | 4.7±2.6   | 19(590) | -0.61 [-0.96, -0.26]  | 10%            | 0.0006    |
| • Post-intervention, RCT     | 4.1±2.3     | 4.9±2.6   | 17(548) | -0.67 [-1.05, -0.29]  | 16%            | 0.0006    |
| • Post-intervention, NRCT    | 2.5±2.1     | 2.5±2.2   | 3(42)   | 0.03 [-1.26, 1.32]    | 0%             | 0.96      |
| <b>SSA</b>                   |             |           |         |                       |                |           |
| • Change, overall            | -11.6±2.4   | -7.0±4.3  | 5(200)  | -4.88 [-7.79, -1.97]  | 88%            | 0.001     |
| • Change, RCT                | -11.6±2.4   | -7.0±4.3  | 5(200)  | -4.88 [-7.79, -1.97]  | 88%            | 0.001     |
| • Post-intervention, overall | 23.2±2.4    | 29.9±4.5  | 5(213)  | -5.41 [-7.82, -3.00]  | 84%            | < 0.00001 |
| • Post-intervention, RCT     | 23.2±2.4    | 29.9±4.5  | 5(213)  | -5.41 [-7.82, -3.00]  | 84%            | < 0.00001 |
| <b>VDS</b>                   |             |           |         |                       |                |           |
| • Change, RCT                | -22.0±13.4  | -8.4±6.7  | 4(101)  | -9.66 [-15.62, -3.69] | 38%            | 0.002     |
| • Post-intervention,         | 41.5±16.2   | 48.2±12.8 | 4(101)  | -5.33 [-17.01, 6.36]  | 70%            | 0.37      |

| Outcome                  | Mean±SD     |            | n (N)  | MD [95% CI]           | I <sup>2</sup> | P value   |
|--------------------------|-------------|------------|--------|-----------------------|----------------|-----------|
|                          | Stimulation | Control    |        |                       |                |           |
| RCT                      |             |            |        |                       |                |           |
| <b>CDS</b>               |             |            |        |                       |                |           |
| • Change, RCT            | -32.9±23.0  | -17.5±21.0 | 2(33)  | -15.55 [-36.91, 5.82] | 46%            | 0.15      |
| • Post-intervention, RCT | 33.8±22.5   | 38.0±20.0  | 2(33)  | -4.84 [-32.75, 23.06] | 70%            | 0.73      |
| <b>WST</b>               |             |            |        |                       |                |           |
| • Change, RCT            | -2.1±1.0    | -0.4±1.4   | 2(150) | -1.58 [-2.20, -0.96]  | 47%            | < 0.00001 |
| • Post-intervention, RCT | 2.1±0.8     | 3.5±1.4    | 2(150) | -1.42 [-1.97, -0.86]  | 41%            | < 0.00001 |
| <b>NEDS</b>              |             |            |        |                       |                |           |
| • Change, RCT            | -2.9±1.5    | -0.8±2.0   | 1(98)  | -2.11 [-2.84, -1.38]  | NA             | < 0.00001 |
| • Post-intervention, RCT | 4.0±1.7     | 5.8±1.6    | 1(98)  | -1.77 [-2.44, -1.10]  | NA             | < 0.00001 |
| <b>BDS</b>               |             |            |        |                       |                |           |
| • Change, RCT            | -2.0±1.2    | -0.5±2.4   | 1(98)  | -1.50 [-2.29, -0.71]  | NA             | 0.0002    |
| • Post-intervention, RCT | 4.0±2.1     | 4.8±1.8    | 1(98)  | -0.75 [-1.53, 0.03]   | NA             | 0.06      |
| <b>TDS</b>               |             |            |        |                       |                |           |
| • Change, RCT            | -4.8±2.1    | -1.1±3.2   | 1(98)  | -3.76 [-4.90, -2.62]  | NA             | < 0.00001 |
| • Post-intervention, RCT | 7.0±3.6     | 10.0±2.6   | 1(98)  | -2.95 [-4.16, -1.74]  | NA             | < 0.00001 |

a: Worsening of dysphagia with increase of dysphagia score; BDS: Bedside dysphagia scale; CDS: Clinical dysphagia scale; CI: Confidence intervals; DSRS: Dysphagia Severity Rating Scale; FDS: Functional Dysphagia Scale; FEDSS: Fiberoptic Endoscopic Dysphagia Severity Scale; I<sup>2</sup>: Heterogeneity; MD: Mean Difference; n: Number of studies; N: Number of patients; NEDS: Neurological Examination of Dysphagia Scale; p: Statistical significance value; PAS: Penetration-Aspiration Scale; SD: Standard Deviation; SFSS: Swallow function scoring system; SSA: Standardized Swallowing Assessment; TDS: Total Dysphagia Score

Fig 3: Effect of stimulation on DSRs in patients with dysphagia after stroke

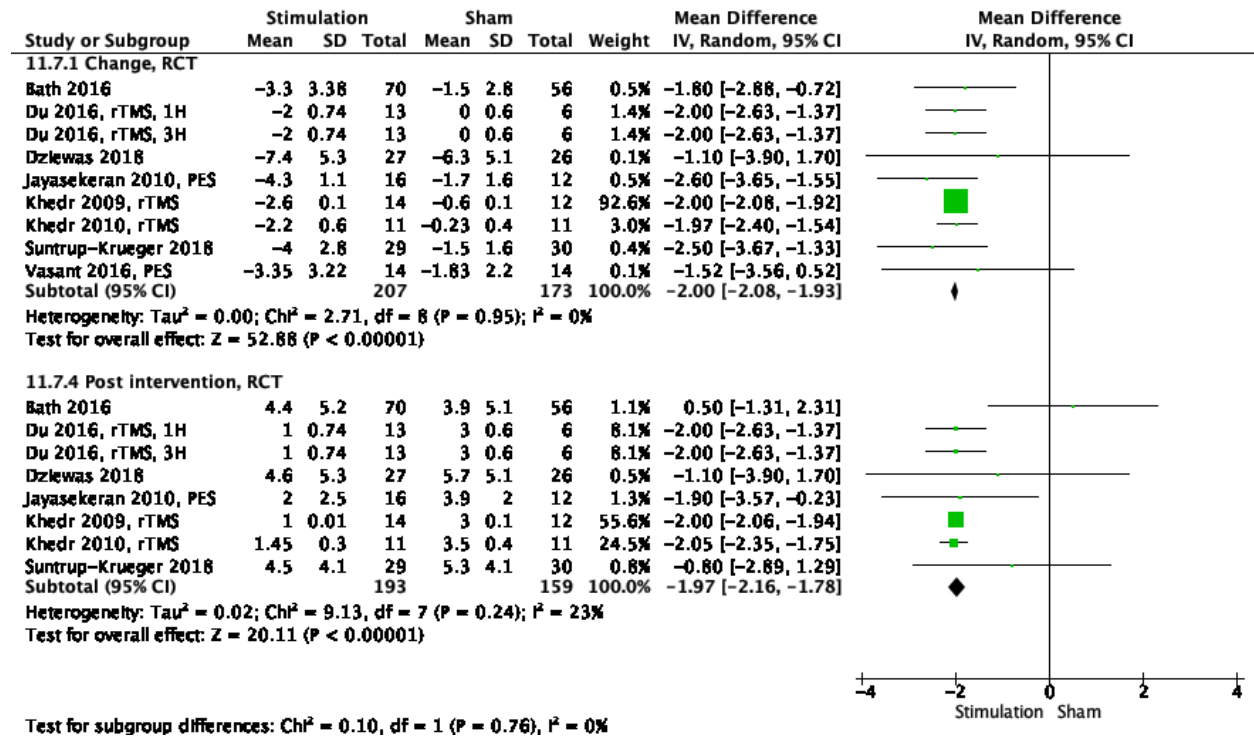

Fig 4: Effect of stimulation on FEDSS in patients with dysphagia after stroke

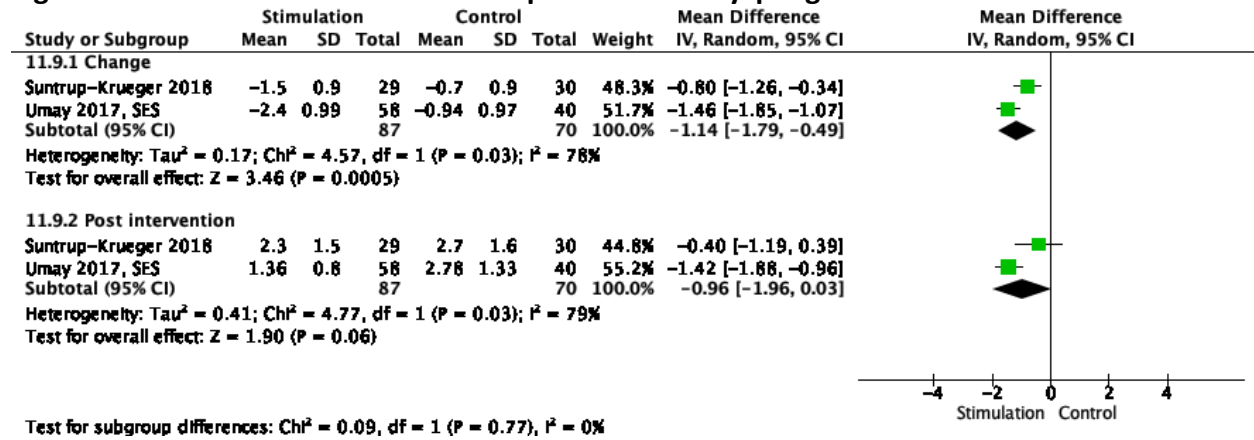



Fig 5: Effect of stimulation on FDS in patients with dysphagia after stroke

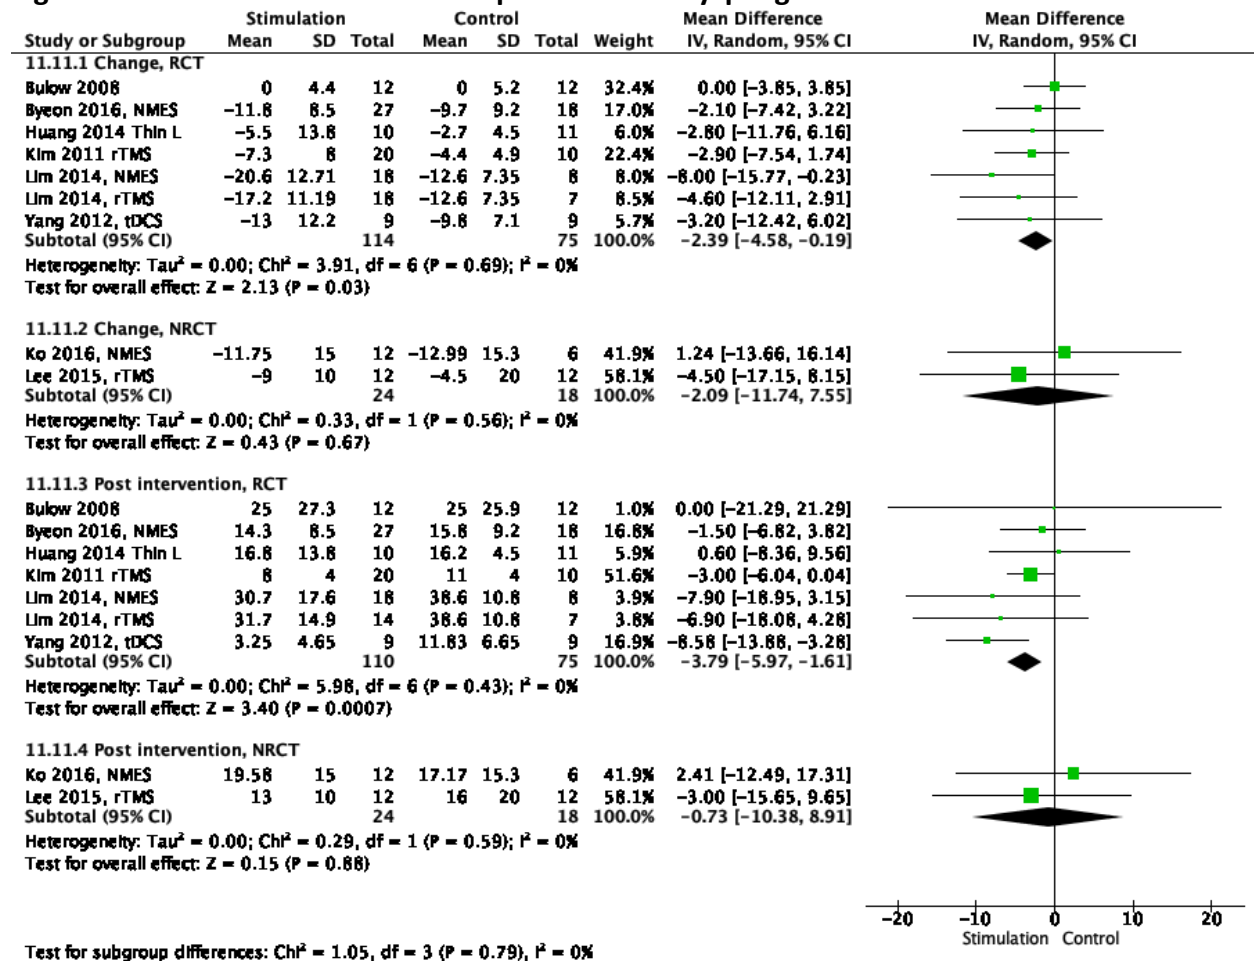

Fig 6: Effect of stimulation on PAS in patients with dysphagia after stroke

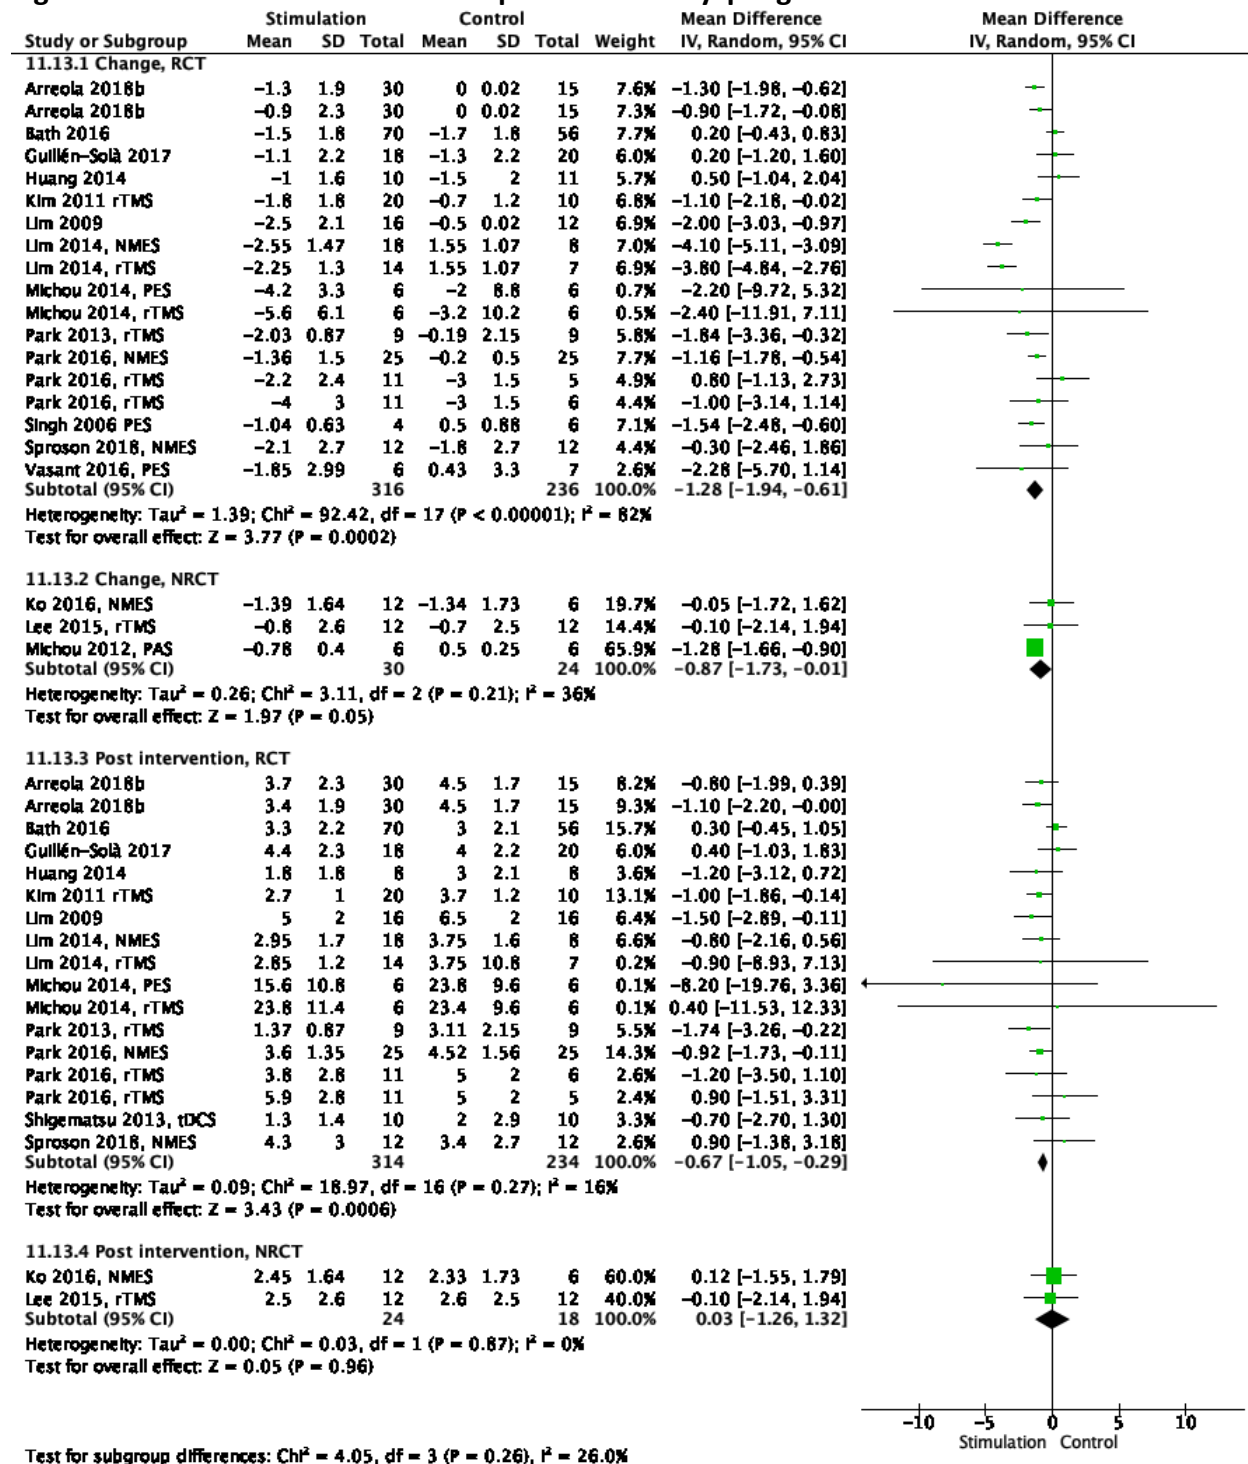

Fig 7: Effect of stimulation on SSA in patients with dysphagia after stroke

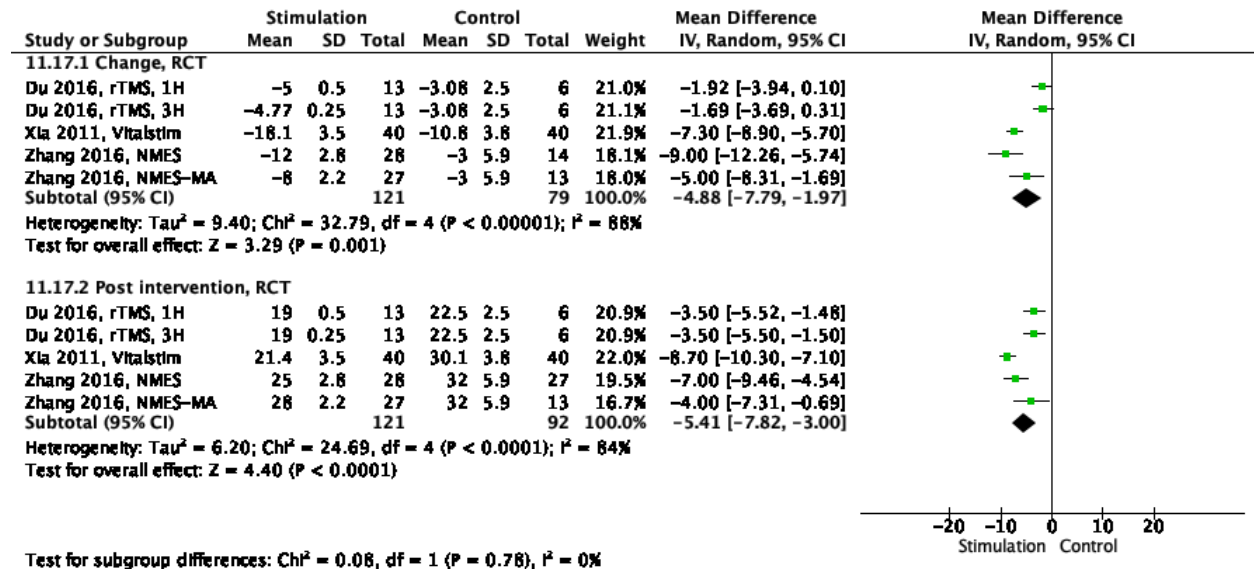

Fig 8: Effect of stimulation on VDS in patients with dysphagia after stroke

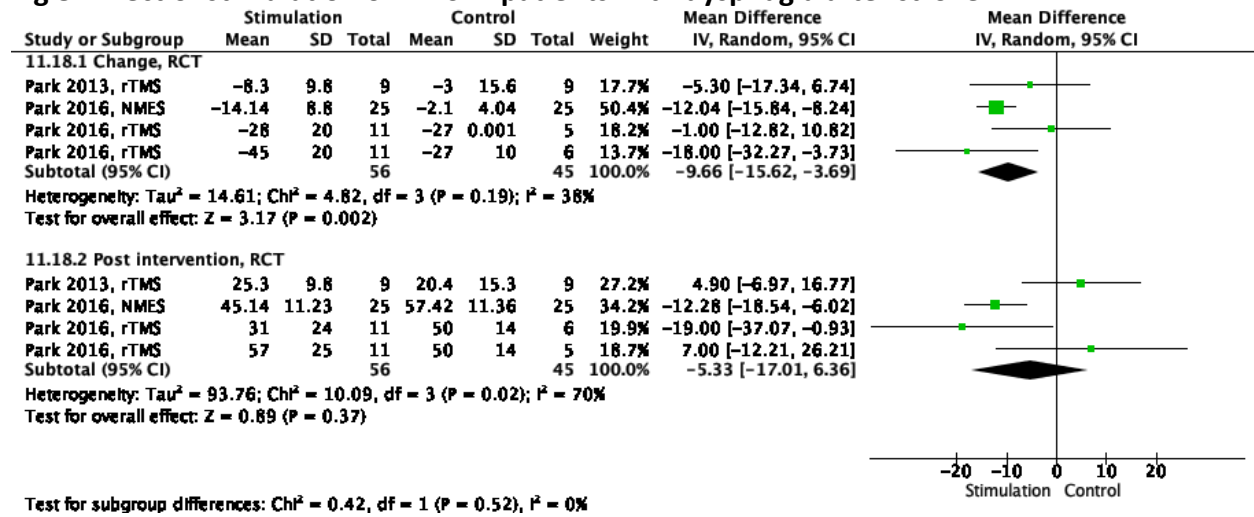

Fig 9: Effect of stimulation on CDS in patients with dysphagia after stroke

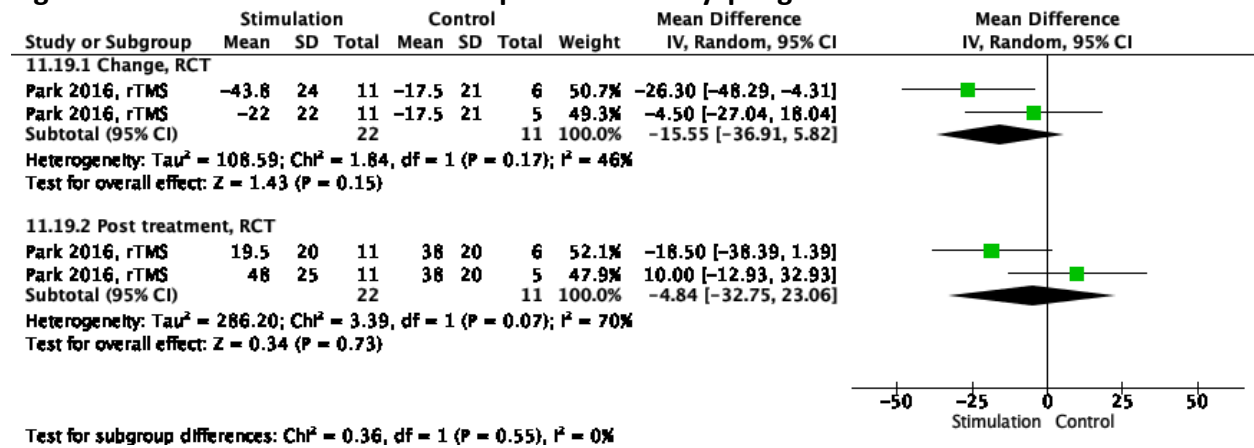

Fig 10: Effect of stimulation on WST in patients with dysphagia after stroke

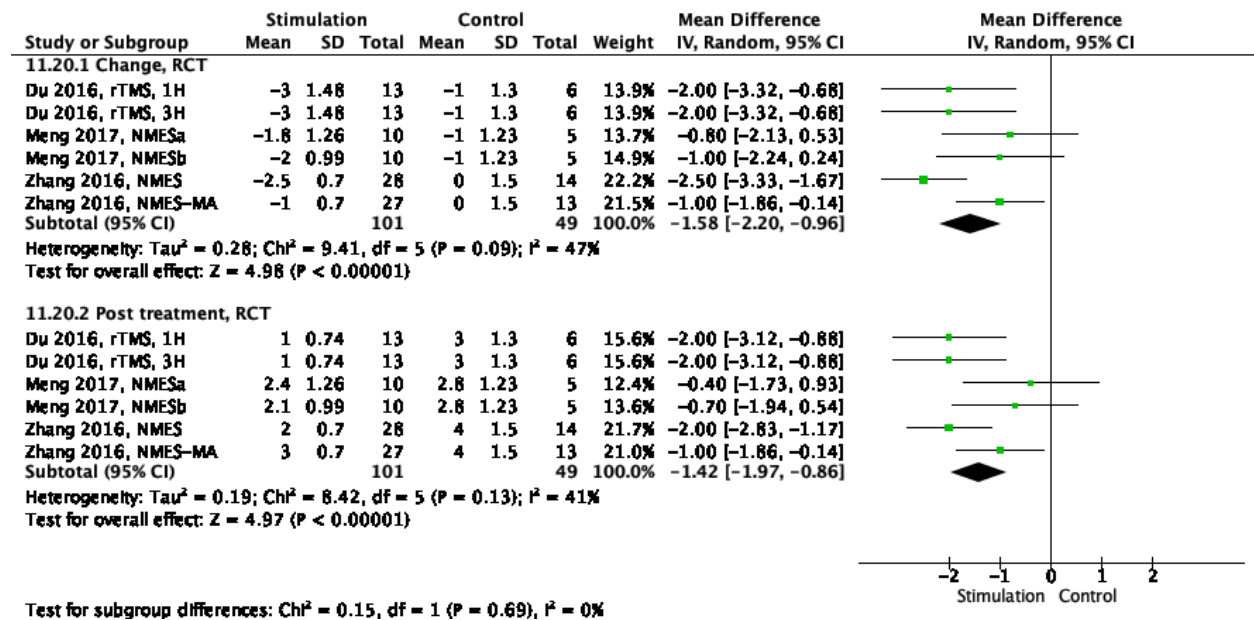

Fig 11: Effect of stimulation on NEDS, BDS, and TDS scores in patients with dysphagia after stroke

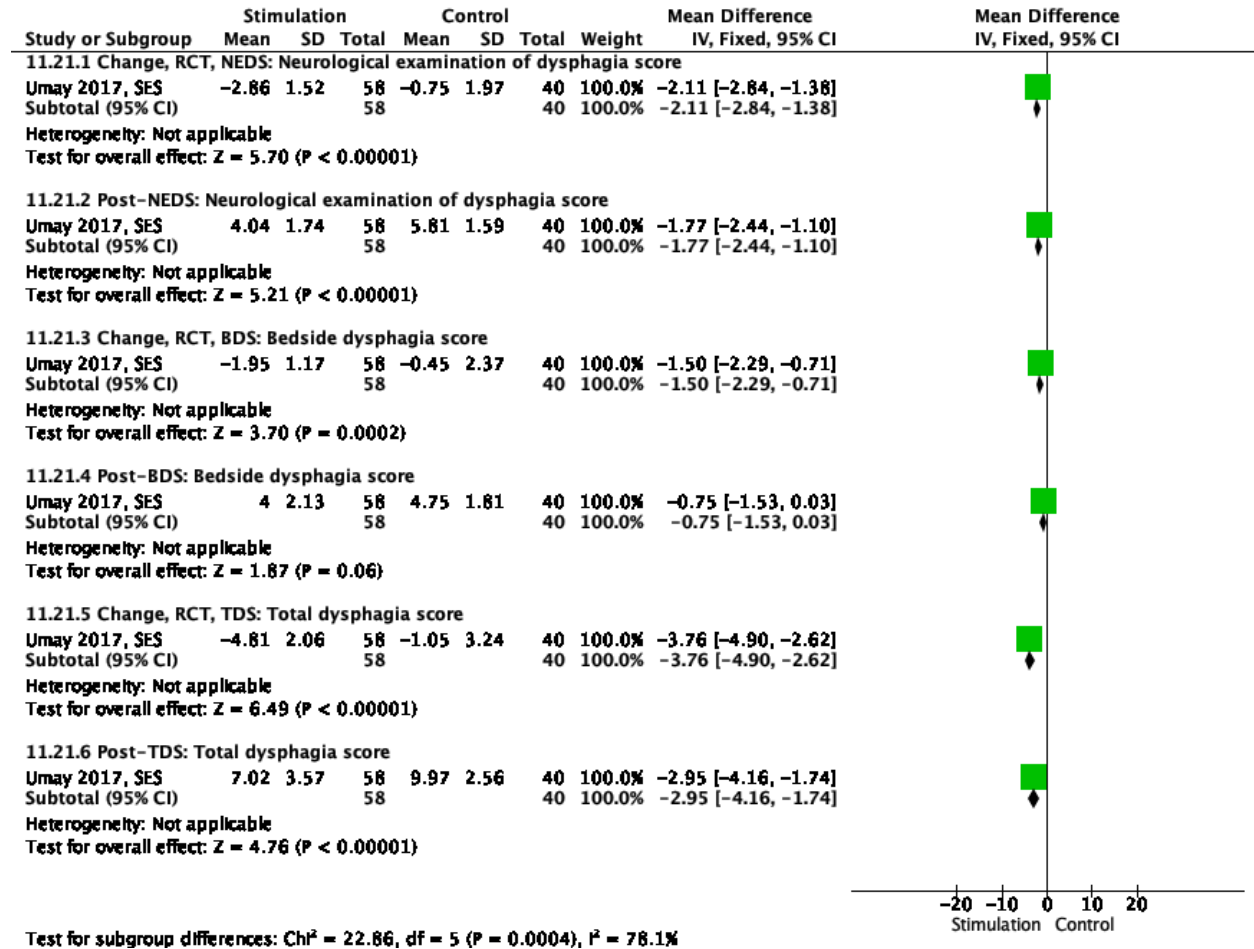

**Table 3: Effect of stimulation on dysphagia score of decreasing-order<sup>a</sup> in patients with dysphagia after stroke**

| Outcome                      | Mean±SD     |            | n (N)   | MD [95% CI]          | I <sup>2</sup> | P value   |
|------------------------------|-------------|------------|---------|----------------------|----------------|-----------|
|                              | Stimulation | Control    |         |                      |                |           |
| <b>FOIS</b>                  |             |            |         |                      |                |           |
| • Change, overall            | 3.4±1.9     | 1.9±1.8    | 11(464) | 1.28 [0.75, 1.80]    | 60%            | < 0.00001 |
| • Change, RCT                | 3.1±1.8     | 1.8±1.7    | 10(372) | 1.19 [0.63, 1.76]    | 60%            | <0.0001   |
| • Change, NRCT               | 4.4±2.1     | 2.4±2.3    | 1(92)   | 2.00 [0.99, 3.01]    | NA             | < 0.0001  |
| • Post-intervention, overall | 5.0±1.9     | 4.0±2.1    | 11(464) | 1.04 [0.57, 1.52]    | 40%            | < 0.0001  |
| • Post-intervention, RCT     | 4.9±1.9     | 4.1±2.0    | 10(372) | 0.94 [0.44, 1.44]    | 36%            | 0.0002    |
| • Post-intervention, NRCT    | 5.1±1.8     | 3.3±2.2    | 1(92)   | 1.80 [0.86, 2.74]    | NA             | 0.0002    |
| <b>DOSS</b>                  |             |            |         |                      |                |           |
| • Change, overall            | 2.2±1.3     | 1.5±1.2    | 12(286) | 0.85 [0.45, 1.24]    | 55%            | < 0.0001  |
| • Change, RCT                | 2.3±1.3     | 1.6±1.2    | 11(262) | 0.81 [0.39, 1.24]    | 58%            | 0.0002    |
| • Change, NRCT               | 1.7±1.6     | 0.4±1.4    | 1(24)   | 1.30 [0.10, 2.50]    | NA             | 0.03      |
| • Post-intervention, overall | 5.2±1.5     | 4.5±1.3    | 8(212)  | 0.62 [0.08, 1.17]    | 80%            | 0.006     |
| • Post-intervention, RCT     | 5.3±1.4     | 4.6±1.3    | 7(188)  | 0.72 [0.16, 1.29]    | 49%            | 0.01      |
| • Post-intervention, NRCT    | 4.3±1.6     | 4.4±1.4    | 1(24)   | -0.10 [-1.30, 1.10]  | NA             | 0.87      |
| <b>ASHA</b>                  |             |            |         |                      |                |           |
| • Change, overall            | 1.2±1.2     | 1.0±1.1    | 3(65)   | 0.31 [-0.17, 0.80]   | 0%             | 0.21      |
| • Change, RCT                | 1.0±1.0     | 0.7±0.8    | 2(47)   | 0.33 [-0.17, 0.83]   | 0%             | 0.20      |
| • Change, NRCT               | 1.6±1.7     | 1.6±2.1    | 1(18)   | 0.04 [-1.86, 1.94]   | NA             | 0.97      |
| • Post-intervention, overall | 4.8±1.3     | 4.6±1.4    | 3(65)   | 0.31 [-0.33, 0.95]   | 0%             | 0.34      |
| • Post-intervention, RCT     | 4.6±1.1     | 4.2±1.1    | 2(47)   | 0.38 [-0.29, 1.06]   | 0%             | 0.27      |
| • Post-intervention, NRCT    | 5.4±1.7     | 5.7±2.1    | 1(18)   | -0.26 [-2.16, 1.64]  | NA             | 0.79      |
| <b>SFS</b>                   |             |            |         |                      |                |           |
| • Change, RCT                | 2.0±1.0     | 0.0±1.0    | 1(32)   | 2.00 [1.31, 2.69]    | NA             | < 0.00001 |
| • Post-intervention, RCT     | 4.0±2.0     | 4.0±2.0    | 1(32)   | 0.00 [-1.39, 1.39]   | NA             | 1.0       |
| <b>MASA</b>                  |             |            |         |                      |                |           |
| • Change, RCT                | 46.2±27.1   | 25.5±18.5  | 1(98)   | 20.70 [11.67, 29.73] | NA             | < 0.00001 |
| • Post-intervention,         | 181.3±20.7  | 157.8±33.6 | 1(98)   | 23.46 [11.77, 35.15] | NA             | < 0.00001 |

| Outcome                  | Mean±SD     |         | n (N) | MD [95% CI]        | I <sup>2</sup> | P value |
|--------------------------|-------------|---------|-------|--------------------|----------------|---------|
|                          | Stimulation | Control |       |                    |                |         |
| RCT                      |             |         |       |                    |                |         |
| <b>RSST</b>              |             |         |       |                    |                |         |
| • Change, RCT            | 1.5±1.8     | 1.2±1.4 | 2(30) | 0.30 [-0.86, 1.46] | 0%             | 0.61    |
| • Post-intervention, RCT | 5.3±1.8     | 5.1±1.4 | 2(30) | 0.15 [-1.01, 1.30] | 0%             | 0.80    |
| <b>Dysphagia limit</b>   |             |         |       |                    |                |         |
| • Change, RCT            | 5.0±5.6     | 1.9±3.2 | 1(55) | 3.1 [0.06, 6.14]   | NA             | 0.05    |
| • Post-intervention, RCT | 10.9±7.8    | 9.6±7.1 | 1(55) | 1.3 [-3.05, 5.65]  | NA             | 0.56    |

a: Worsening of dysphagia with decrease of dysphagia score; CI: Confidence intervals; DOSS: Dysphagia Outcome and Severity Scale; FOIS: Functional oral intake scale; I<sup>2</sup>: Heterogeneity; MASA: Mann Assessment of Swallowing Ability; MD: Mean Difference; n: Number of studies; N: Number of patients; p: Statistical significance value; SD: Standard Deviation; SFS: Swallow functional score

Fig 12: Effect of stimulation on FOIS in patients with dysphagia after stroke

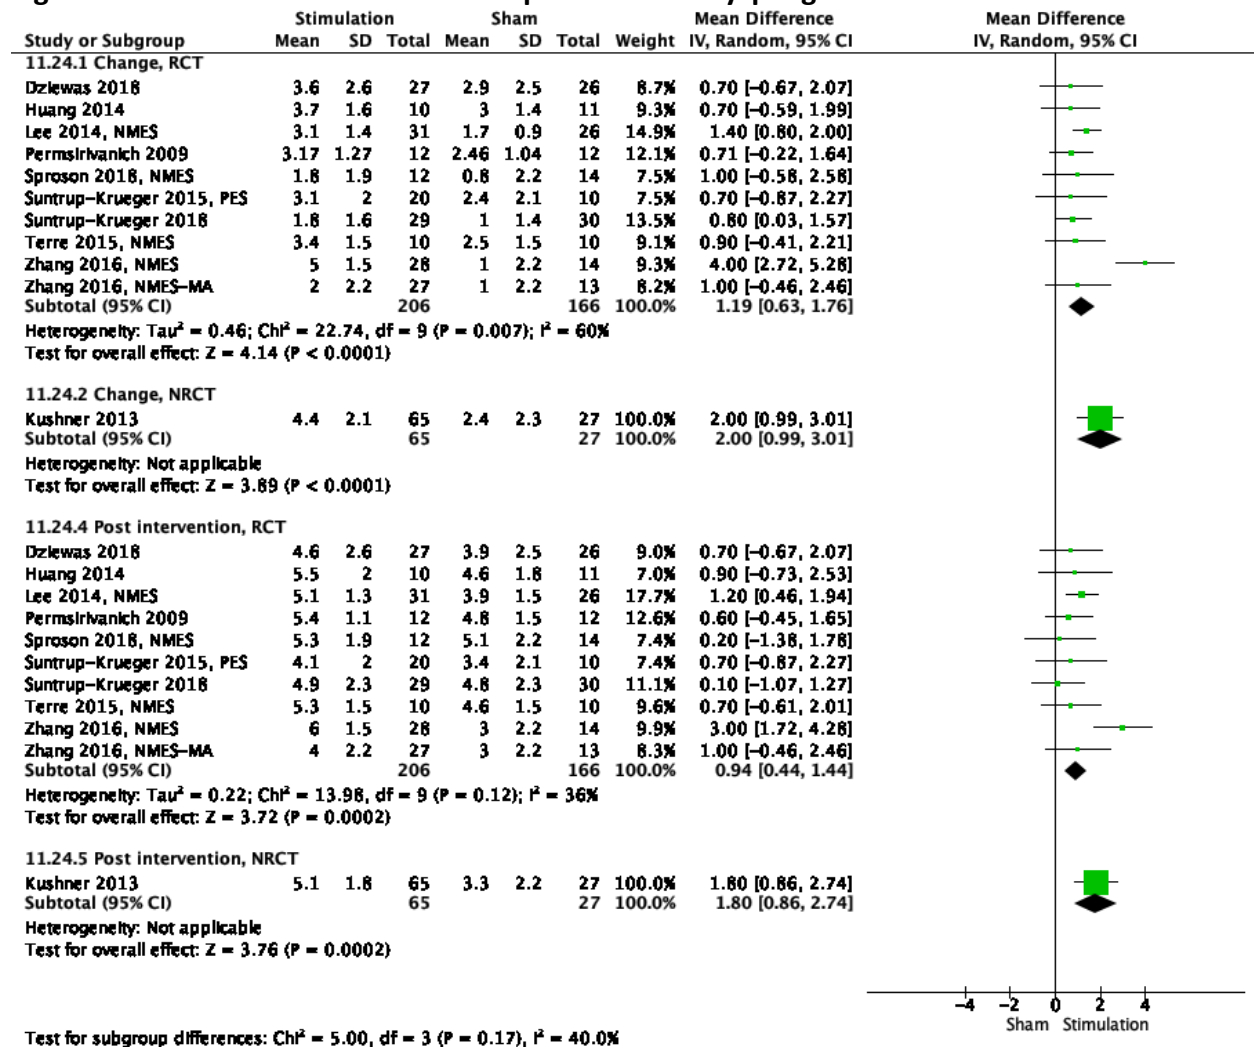



Fig 13: Effect of stimulation on DOSS in patients with dysphagia after stroke

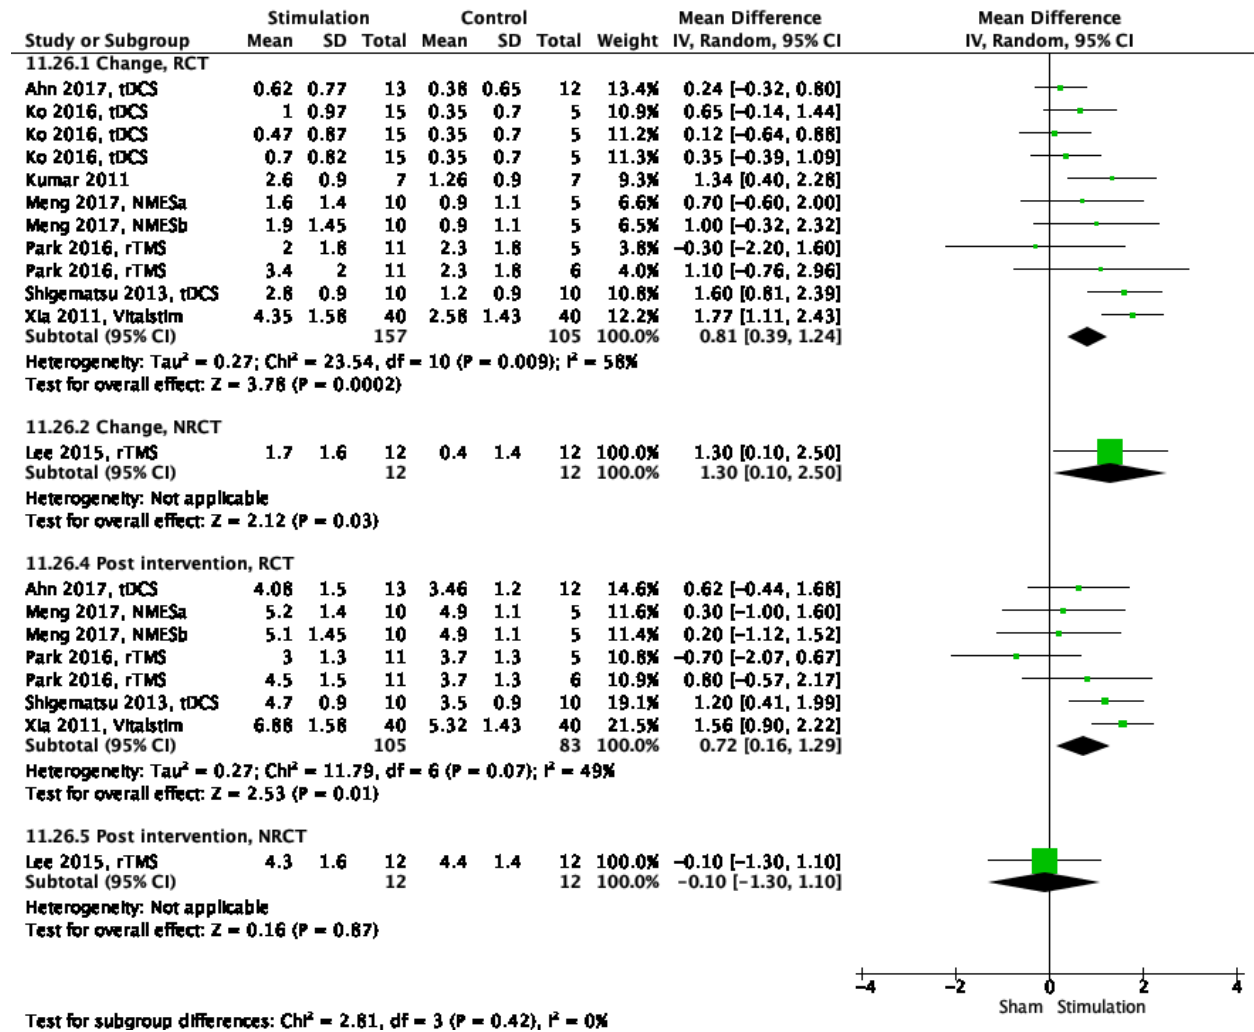

Fig 14: Effect of stimulation on ASHA in patients with dysphagia after stroke

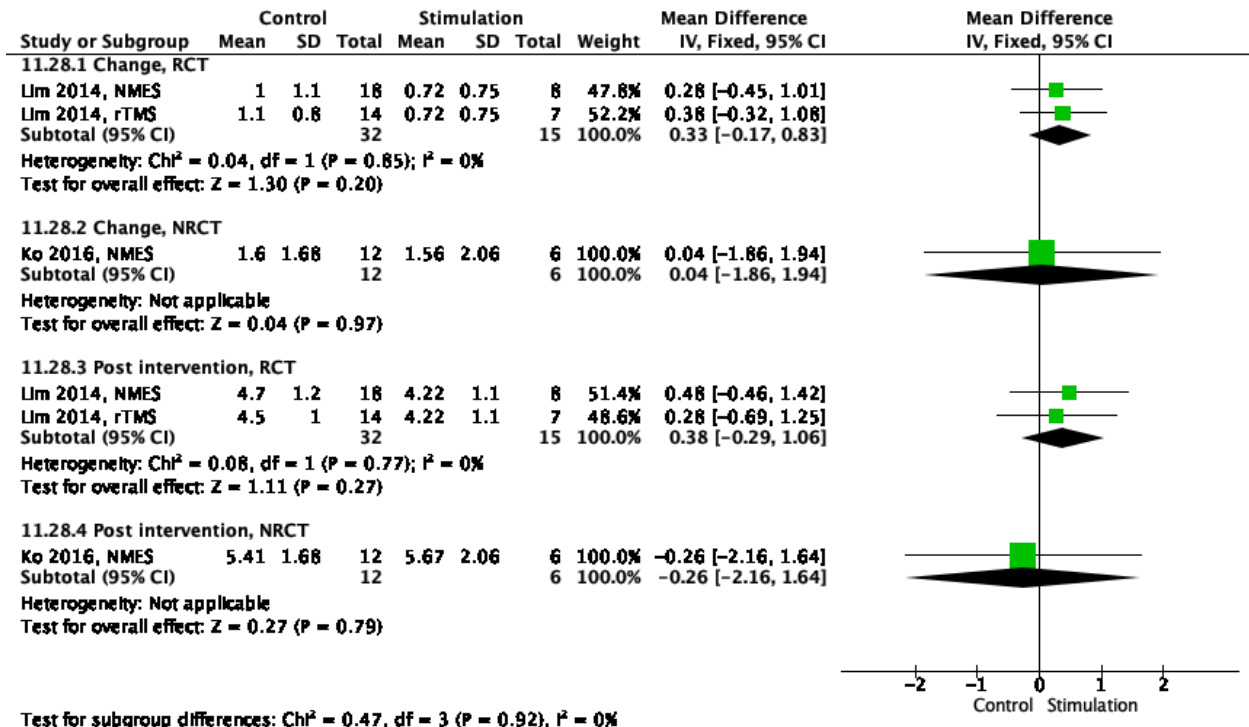

Fig 15: Effect of stimulation on SFS (Swallow functional score) in patients with dysphagia after stroke

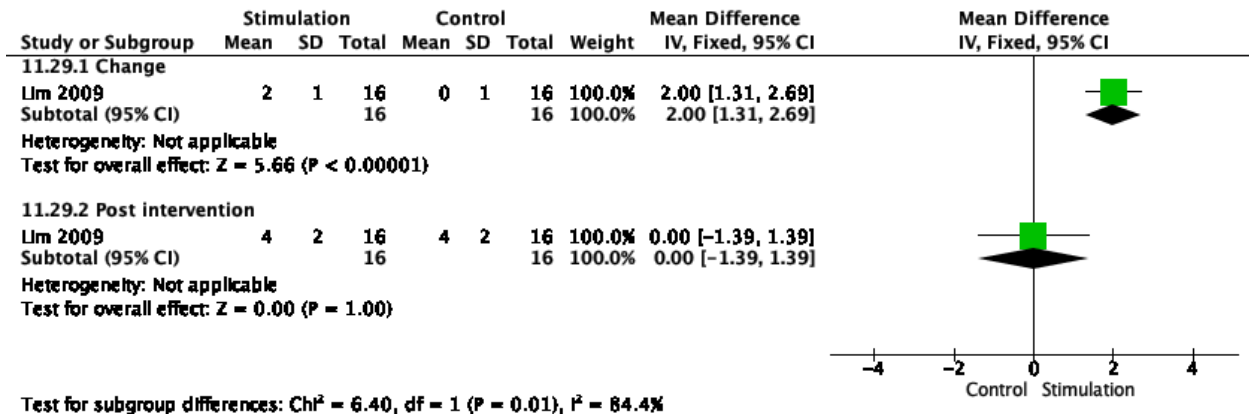

Fig 16: Effect of stimulation on MASA in patients with dysphagia after stroke

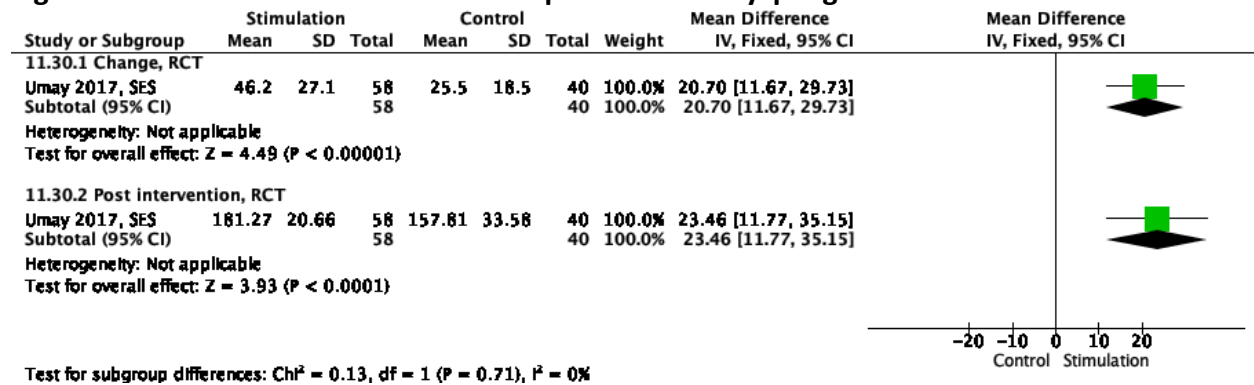

Fig 17: Effect of stimulation on RSST in patients with dysphagia after stroke

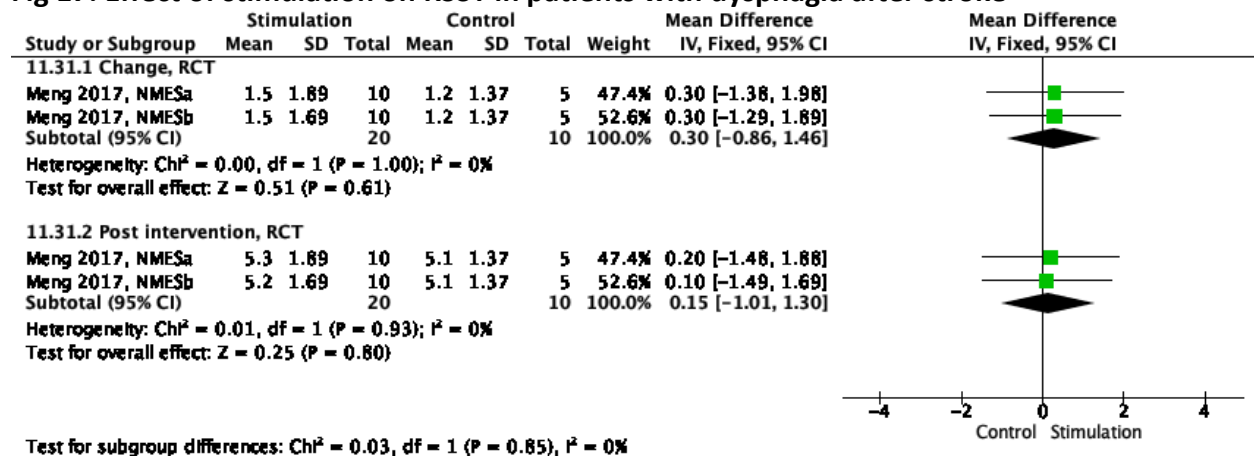

Fig 18: Effect of stimulation on Dysphagia limit in patients with dysphagia after stroke

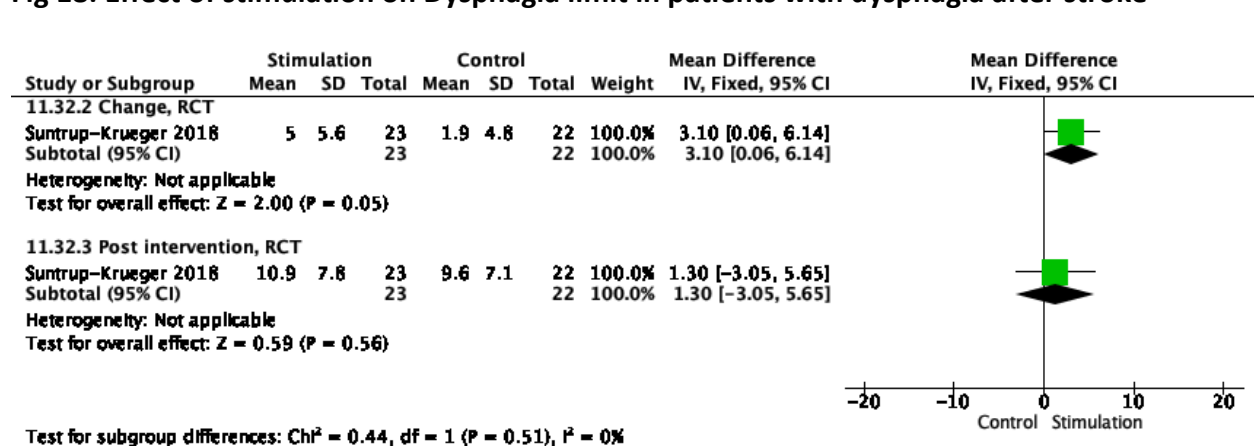

**Table 4: Effect of stimulation on mortality, mRS, pneumonia, BI, and length of stay in patients with dysphagia after stroke**

| Outcome                       | Mean±SD/ %  |           | n (N)  | MD/ RR [95% CI]       | I <sup>2</sup> | P value   |
|-------------------------------|-------------|-----------|--------|-----------------------|----------------|-----------|
|                               | Stimulation | Control   |        |                       |                |           |
| <b>Mortality, RCT</b>         |             |           |        |                       |                |           |
| • 2 weeks, PES                | 3.5%        | 1.5%      | 2(154) | 1.66 [0.22, 12.37]    | 0%             | 0.62      |
| • 3 months, PES               | 13.8%       | 12.0%     | 3(231) | 1.10 [0.55, 2.18]     | 0%             | 0.78      |
| <b>mRS, RCT</b>               | 3.2±1.0     | 3.9±1.0   | 3(215) | -0.68 [-1.22, -0.13]  | 62%            | 0.01      |
| • rTMS                        | 1.0±0.7     | 2.5±1.3   | 1(38)  | -1.50 [-2.29, -0.71]  | 0%             | 0.0002    |
| • PES                         | 3.8±1.1     | 4.2±1.0   | 2(177) | -0.33 [-0.63, -0.02]  | 0%             | 0.04      |
| <b>Pneumonia, RCT</b>         |             |           |        |                       |                |           |
| • TES                         | 5.8%        | 8.5%      | 2(99)  | 0.75 [0.19, 2.95]     | NA             | 0.68      |
| • tDCS                        | 37.9%       | 53.3%     | 1(59)  | 0.71 [0.40, 1.26]     | NA             | 0.24      |
| • PES                         | 7.6%        | 11.5%     | 2(209) | 0.66 [0.29, 1.52]     | 0%             | 0.33      |
| <b>BI</b>                     |             |           |        |                       |                |           |
| • rTMS, Overall               | 76.8±7.9    | 52.8±14.5 | 5(110) | 29.54 [25.82, 33.26]  | 87%            | < 0.00001 |
| • rTMS, RCT                   | 79.8±5.1    | 46.9±12.7 | 4(86)  | 31.57 [27.75, 35.39]  | 73%            | < 0.00001 |
| • rTMS, NRCT                  | 64.0±20.0   | 70.0±20.0 | 1(24)  | -6.00 [-22.00, 10.00] | NA             | 0.46      |
| • PES, RCT                    | 36.1±30.5   | 27.0±25.7 | 2(154) | -0.34 [-1.19, 0.51]   | 74%            | 0.43      |
| <b>LOS, Hospital (d), RCT</b> |             |           |        |                       |                |           |
| • tDCS                        | 16.2±6.8    | 13.4±5.1  | 1(59)  | 2.80 [-0.28, 5.88]    | NA             | 0.07      |
| • PES                         | 32.4±20.7   | 35.3±22.1 | 3(192) | -4.23 [-12.11, 3.66]  | 33%            | 0.29      |
| <b>LOS, ICU (d), RCT</b>      |             |           |        |                       |                |           |
| • tDCS                        | 6.7±4.4     | 7.0±3.3   | 1(59)  | -0.30 [-2.29, 1.69]   | NA             | 0.77      |
| • PES                         | 38.2±14.9   | 38.8±19.7 | 1(59)  | -0.60 [-14.45, 13.25] | NA             | 0.93      |

CI: Confidence intervals; ICU: Intensive care unit; I<sup>2</sup>: Heterogeneity; LOS: Length of Stay; n: Number of studies; N: Number of patients; NA: Not applicable; p: Statistical significance value; QoL: Quality of life; SD: Standard Deviation; MD: Mean Difference; RR: Risk Ratio

Fig 19: Effect of PES on Mortality in patients with dysphagia after stroke

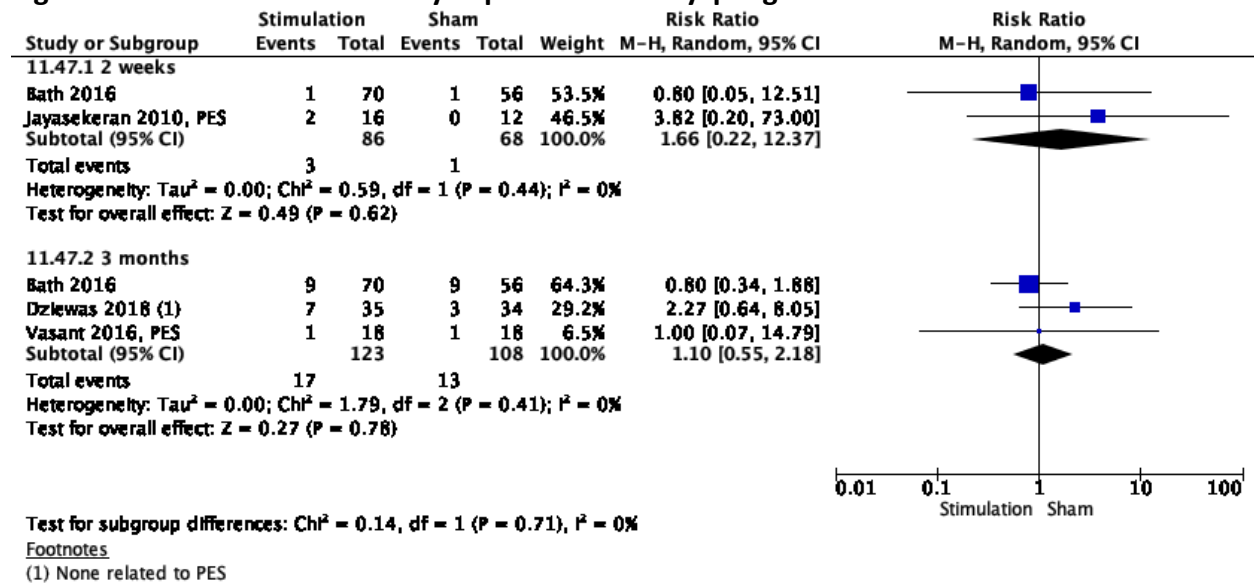

Fig 20: Effect of stimulation on mRS in patients with dysphagia after stroke

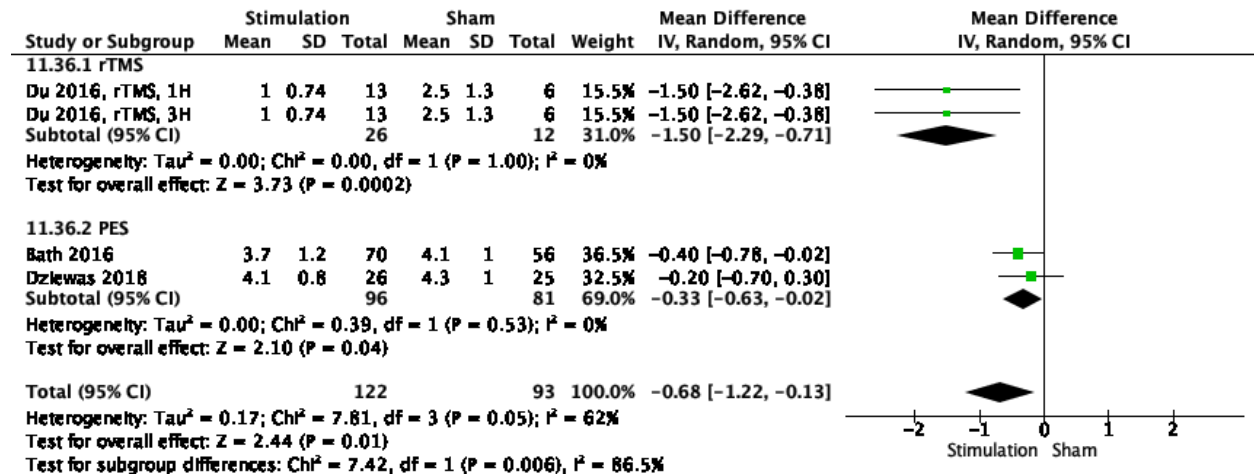

Fig 21: Effect of stimulation on Pneumonia in patients with dysphagia after stroke

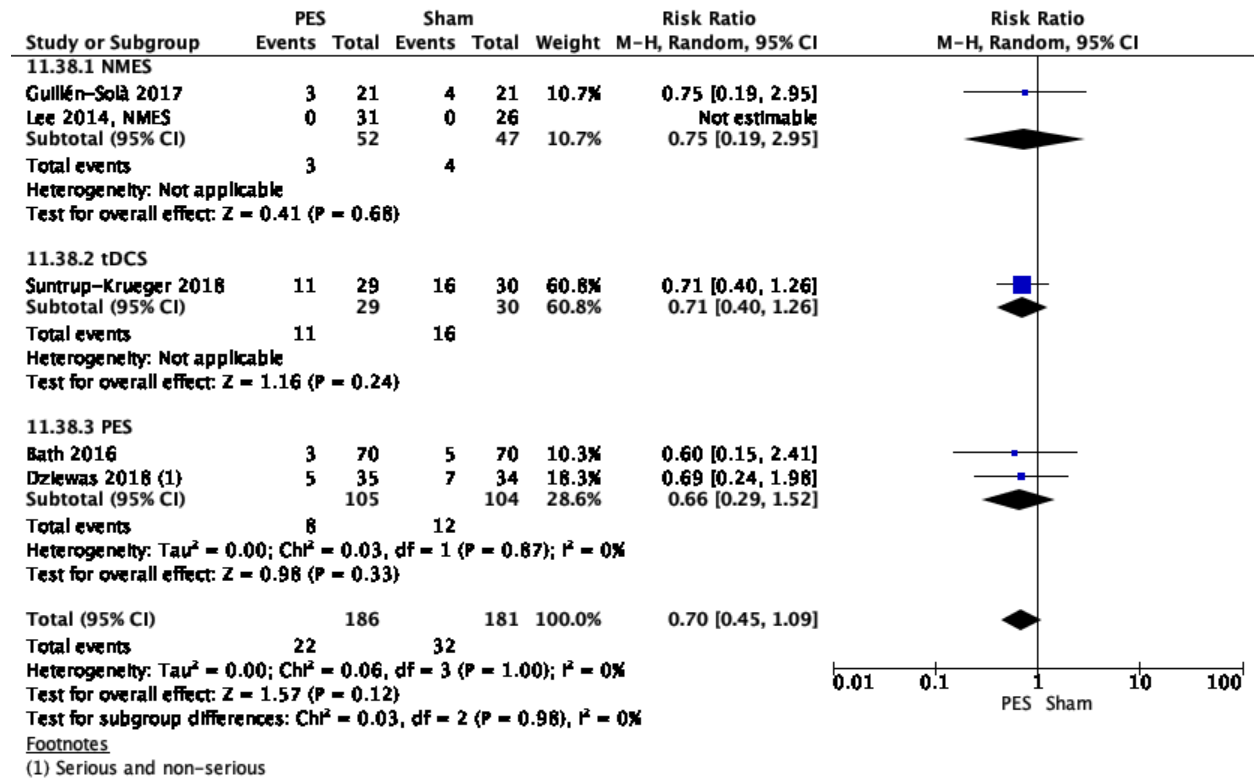

Fig 22: Effect of stimulation on BI in patients with dysphagia after stroke

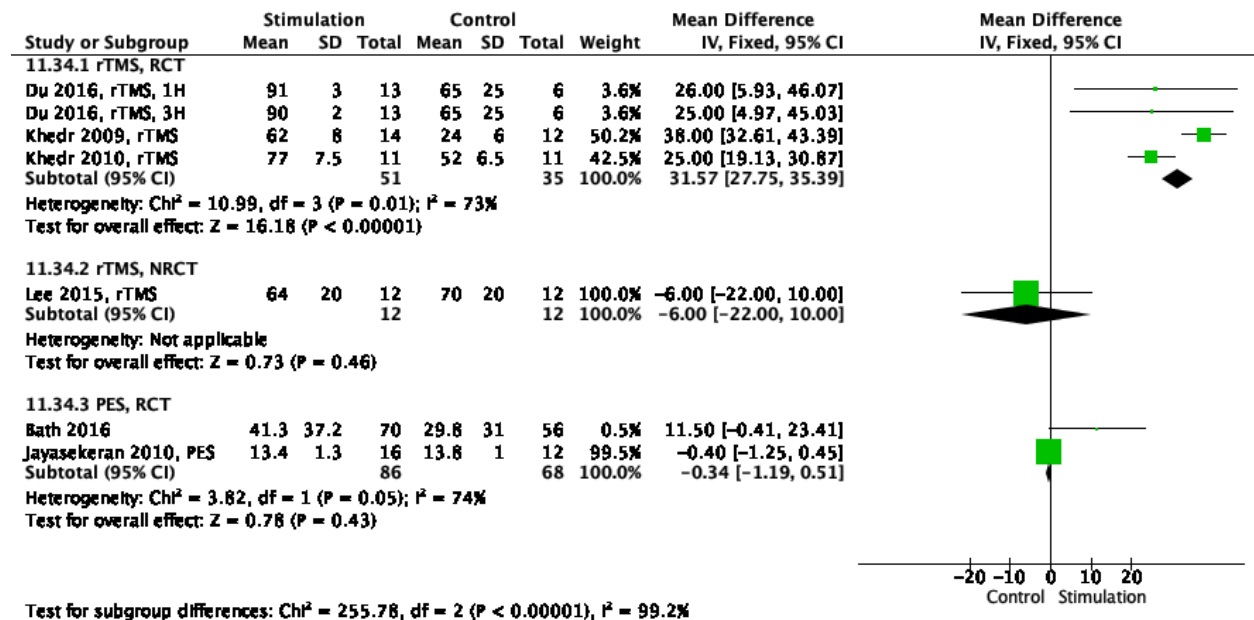

**Fig 23: Effect of stimulation on Length of stay in Hospital or ICU in patients with dysphagia after stroke**

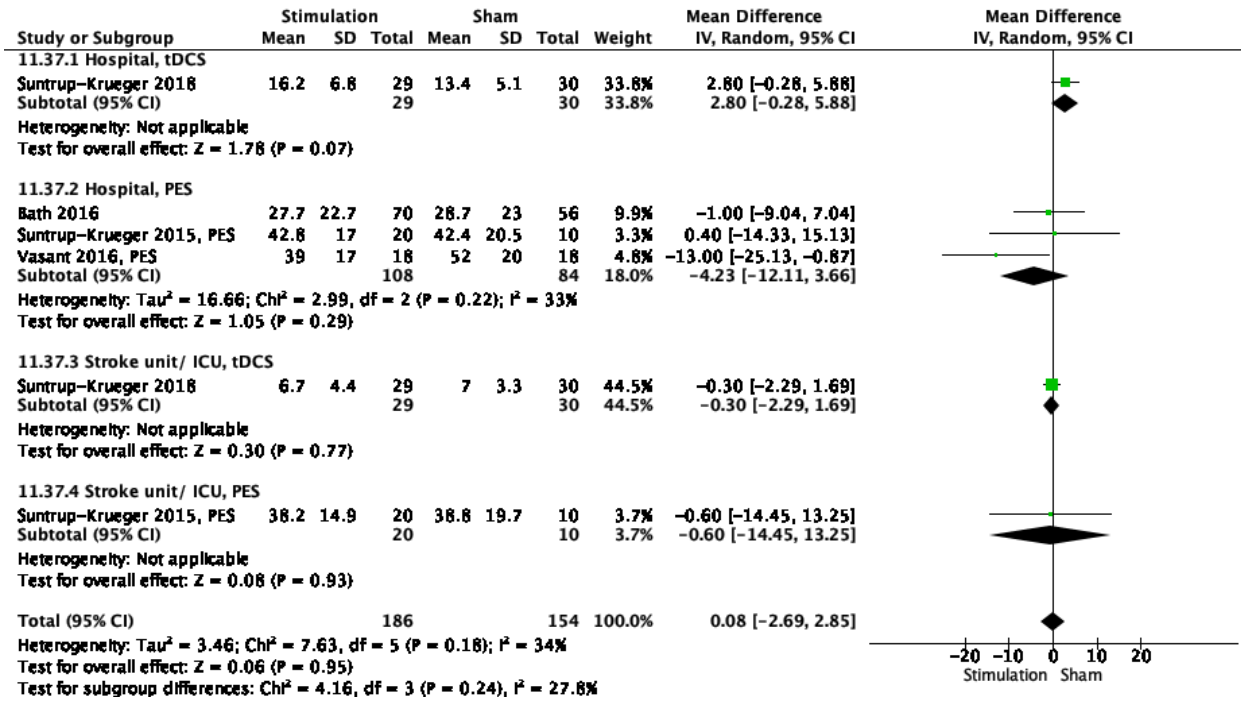

**Table 5: Effect of stimulation on different outcomes in patients with dysphagia after stroke**

| Outcome                                        | Mean±SD/ %  |            | n (N)  | MD/ RR [95% CI]      | I <sup>2</sup> | P value  |
|------------------------------------------------|-------------|------------|--------|----------------------|----------------|----------|
|                                                | Stimulation | Control    |        |                      |                |          |
| <b>Decannulation</b>                           |             |            |        |                      |                |          |
| • Tracheotomised patients, PES, Overall        | 59.0%       | 7.5%       | 3(145) | 5.43 [2.42, 12.16]   | 0%             | < 0.0001 |
| • Tracheotomised patients, PES, RCT            | 58.2%       | 11.4%      | 2(99)  | 4.64 [2.00, 10.79]   | 0%             | 0.004    |
| • Tracheotomised patients, PES, NRCT           | 60.9%       | 0.0%       | 1(46)  | 29.00 [1.83, 459.04] | NA             | 0.02     |
| <b>Tube removal</b>                            |             |            |        |                      |                |          |
| • Other patients, NMES, RCT                    | 50.0%       | 14.3%      | 1(19)  | 3.50 [0.52, 23.42]   | NA             | 0.2      |
| • Other patients, PES, RCT                     | 50.0%       | 28.6%      | 1(30)  | 1.75 [0.67, 4.58]    | NA             | 0.25     |
| <b>Quality of life, Anxiety and Depression</b> |             |            |        |                      |                |          |
| <b>Change, RCT</b>                             |             |            |        |                      |                |          |
| Swallowing QoL                                 | 26.2±18.2   | 7.2±17.1   | 3(106) | 18.02 [11.41, 24.63] | 37%            | <0.00001 |
| Hamilton anxiety scale                         | -4.0±6.0    | -0.2±6     | 1(112) | -3.83 [-6.06, -1.60] | NA             | 0.0007   |
| Hamilton depression scale                      | -3.9±5.0    | -0.9±5.0   | 1(112) | -2.94 [-4.79, -1.09] | NA             | 0.002    |
| Functional independence measure                | 21.5±19.0   | 9.3±23.3   | 1(98)  | 12.20 [3.48, 20.92]  | NA             | 0.006    |
| <b>Post intervention, RCT</b>                  |             |            |        |                      |                |          |
| EQ-5D as HUS (Health Utility status)           | 0.008±0.41  | -0.04±0.39 | 1(126) | 0.05 [-0.09, 0.19]   | NA             | 0.50     |
| EQ-VAS                                         | 51.6±30.1   | 48.6±31.7  | 1(126) | 3.00 [-7.89, 13.89]  | NA             | 0.59     |
| Swallowing QoL                                 | 228±27      | 213±24     | 4(186) | 16.26 [9.92, 22.60]  | 41%            | <0.0001  |
| Hamilton anxiety scale                         | 11.3±4.8    | 15.3±7.0   | 1(112) | -4.09 [-6.33, -1.85] | NA             | 0.0004   |
| Hamilton depression scale                      | 12.2±6.9    | 16.3±7.6   | 1(112) | -4.11 [-6.79, -1.43] | NA             | 0.003    |
| Functional independence                        | 74.5±23.8   | 61.5±21.6  | 1(98)  | 12.95 [3.87, 22.03]  | NA             | 0.005    |



|         |  |  |  |  |  |  |
|---------|--|--|--|--|--|--|
| measure |  |  |  |  |  |  |
|---------|--|--|--|--|--|--|

CI: Confidence intervals; ICU: Intensive care unit;  $I^2$ : Heterogeneity; LOS: Length of Stay; n: Number of studies; N: Number of patients; NA: Not applicable; p: Statistical significance value; QoL: Quality of life; SD: Standard Deviation; MD: Mean Difference; RR: Risk Ratio

**Fig 24: Effect of stimulation on Decannulation in tracheotomized patients and tube removal after stroke**

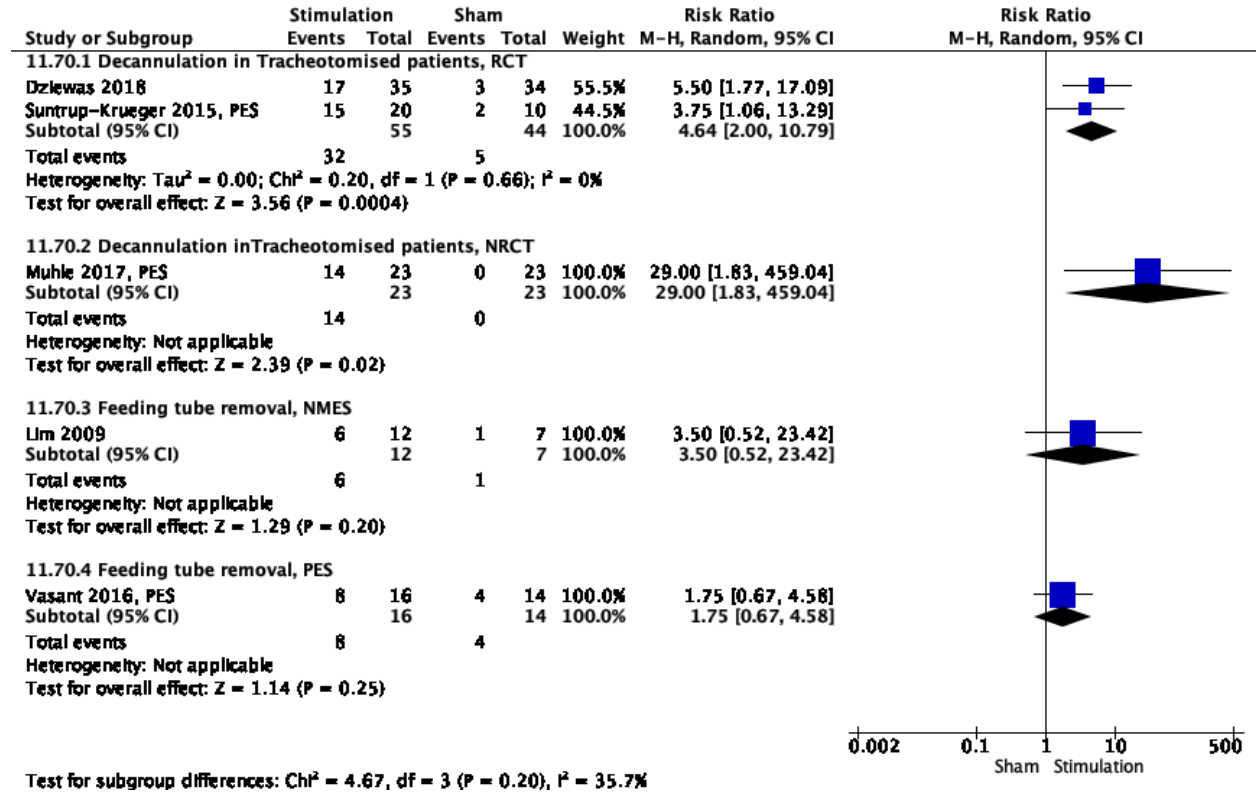

Fig 25: Effect of stimulation on Quality of life scales in patients with dysphagia after stroke

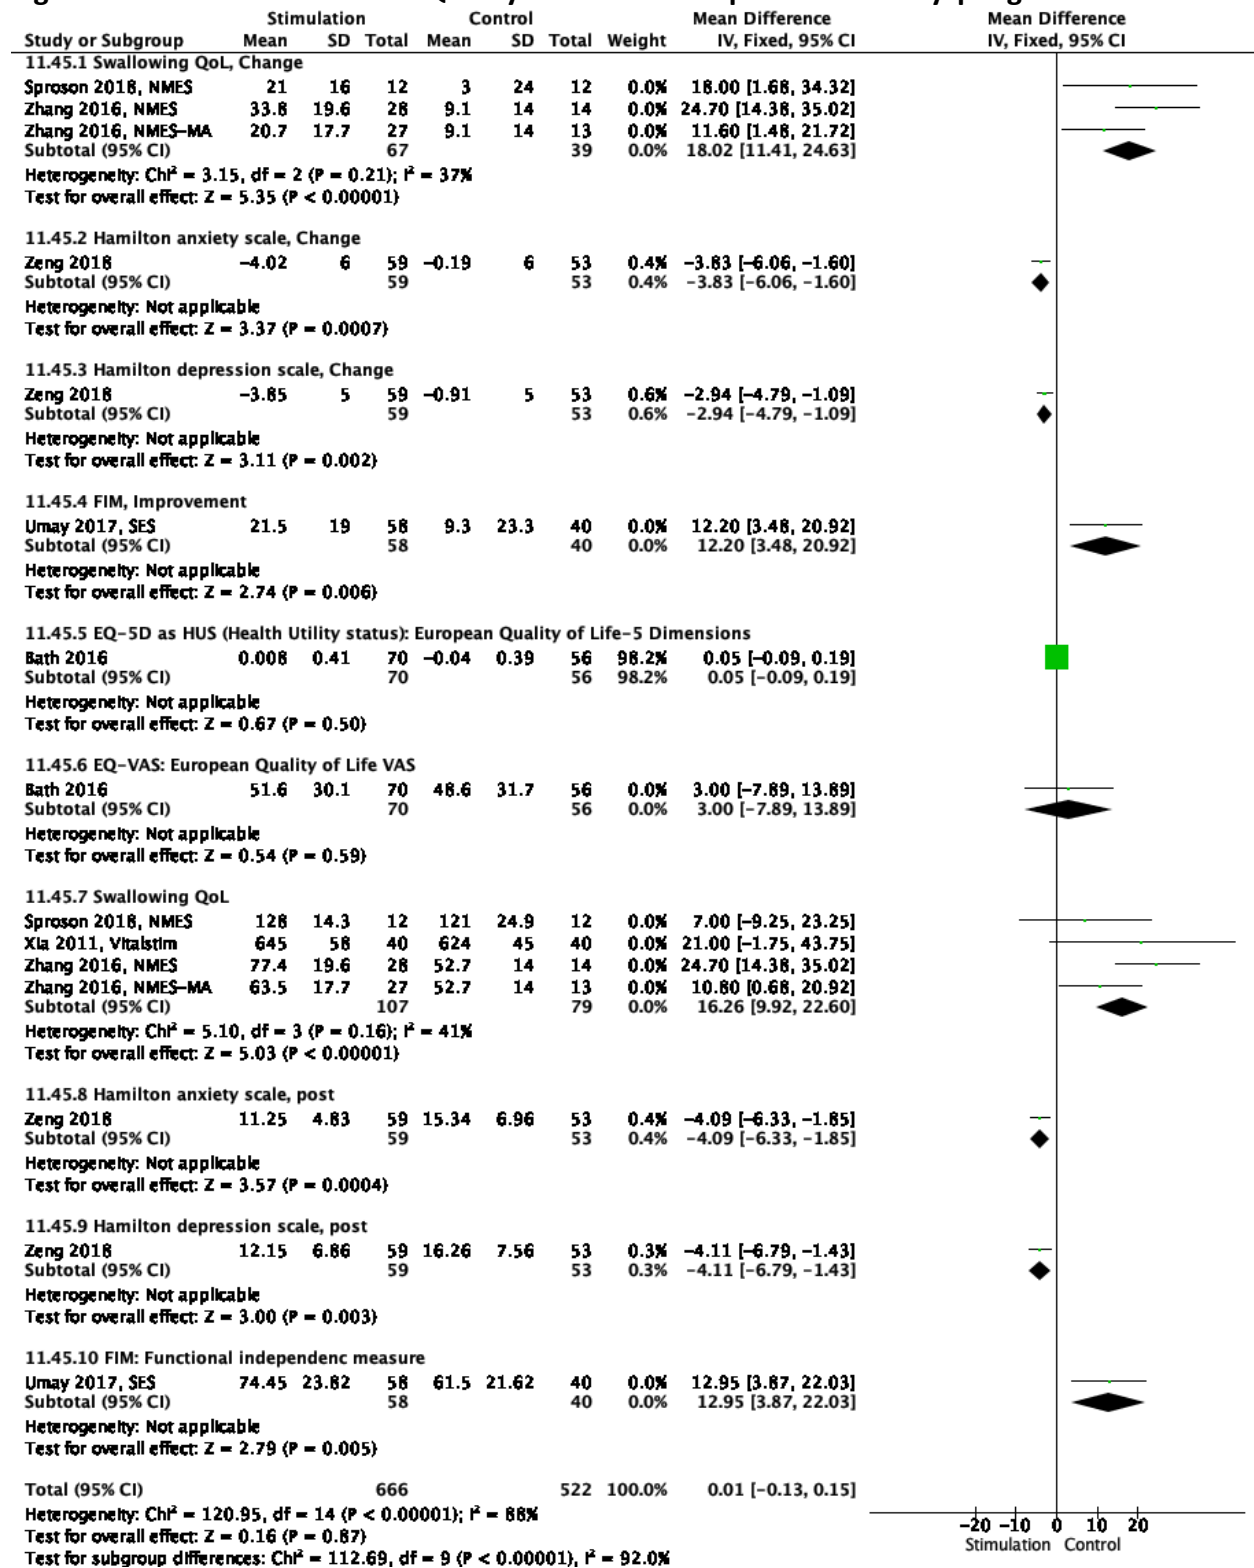

## Supplement 5: Risk of Bias Analyses

## Epidemiology

| Author              | Internal validity |                       |     |     |     |     |            |     |     |     |      |      |             | Overall  |            |
|---------------------|-------------------|-----------------------|-----|-----|-----|-----|------------|-----|-----|-----|------|------|-------------|----------|------------|
|                     | Conduct of study  | Selection of subjects |     |     |     |     | Assessment |     |     |     |      |      | Confounding | Analysis | ROB        |
|                     |                   | 1.1                   | 1.2 | 1.3 | 1.4 | 1.5 | 1.6        | 1.7 | 1.8 | 1.9 | 1.10 | 1.11 |             |          |            |
| Al-Khaled 2016      | Yes               | Yes                   | NA  | Yes | NA  | NA  | Yes        | No  | CS  | Yes | Yes  | NA   | Yes         | Yes      | Acceptable |
| Alsumrain 2013      | Yes               | CS                    | NA  | Yes | NA  | NA  | Yes        | No  | CS  | Yes | Yes  | NA   | No          | Yes      | Acceptable |
| Arnold 2016         | Yes               | Yes                   | NA  | Yes | NA  | NA  | Yes        | No  | CS  | Yes | Yes  | NA   | Yes         | Yes      | Acceptable |
| Babi 2014           | Yes               | Yes                   | NA  | Yes | NA  | NA  | Yes        | No  | CS  | Yes | Yes  | NA   | Yes         | Yes      | Acceptable |
| Baroni 2012         | Yes               | Yes                   | NA  | Yes | NA  | NA  | Yes        | No  | CS  | Yes | Yes  | NA   | Yes         | Yes      | Acceptable |
| Bonilha 2014        | Yes               | Yes                   | NA  | Yes | NA  | NA  | Yes        | No  | CS  | Yes | Yes  | NA   | Yes         | Yes      | Acceptable |
| Brogan 2014         | Yes               | CS                    | NA  | Yes | NA  | NA  | Yes        | No  | CS  | Yes | Yes  | NA   | No          | Yes      | Acceptable |
| Chua 1996           | Yes               | CS                    | NA  | Yes | NA  | NA  | Yes        | No  | CS  | Yes | Yes  | NA   | No          | Yes      | Acceptable |
| Crary 2013          | Yes               | Yes                   | NA  | Yes | NA  | NA  | Yes        | No  | CS  | Yes | Yes  | NA   | Yes         | Yes      | Acceptable |
| de Castillo 2017    | Yes               | CS                    | NA  | Yes | NA  | NA  | Yes        | No  | CS  | Yes | Yes  | NA   | No          | Yes      | Acceptable |
| DePippo 1994        | Yes               | Yes                   | NA  | Yes | NA  | NA  | Yes        | No  | CS  | Yes | Yes  | NA   | Yes         | Yes      | Acceptable |
| Falsetti 2009       | Yes               | Yes                   | NA  | Yes | NA  | NA  | Yes        | No  | CS  | Yes | Yes  | NA   | Yes         | Yes      | Acceptable |
| Finlayson 2011      | Yes               | CS                    | NA  | Yes | NA  | NA  | Yes        | No  | CS  | Yes | Yes  | NA   | No          | Yes      | Acceptable |
| Gordon 1987         | Yes               | Yes                   | NA  | Yes | NA  | NA  | Yes        | No  | CS  | Yes | Yes  | NA   | Yes         | Yes      | Acceptable |
| Gottlieb 1996       | Yes               | CS                    | NA  | Yes | NA  | NA  | Yes        | No  | CS  | Yes | Yes  | NA   | No          | Yes      | Acceptable |
| Guyomard 2009       | Yes               | Yes                   | NA  | Yes | NA  | NA  | Yes        | No  | CS  | Yes | Yes  | NA   | Yes         | Yes      | Acceptable |
| Hamidon 2006        | Yes               | CS                    | NA  | Yes | NA  | NA  | Yes        | No  | CS  | Yes | Yes  | NA   | No          | Yes      | Acceptable |
| Hinds 1998          | Yes               | Yes                   | NA  | Yes | NA  | NA  | Yes        | No  | CS  | Yes | Yes  | NA   | Yes         | Yes      | Acceptable |
| Hoffmann 2017       | Yes               | Yes                   | NA  | Yes | NA  | NA  | Yes        | No  | CS  | Yes | Yes  | NA   | Yes         | Yes      | Acceptable |
| Hoffmann 2012       | Yes               | CS                    | NA  | Yes | NA  | NA  | Yes        | No  | CS  | Yes | Yes  | NA   | No          | Yes      | Acceptable |
| Holas 1994          | Yes               | CS                    | NA  | Yes | NA  | NA  | Yes        | No  | CS  | Yes | Yes  | NA   | No          | Yes      | Acceptable |
| Jeyaseelan 2015     | Yes               | Yes                   | NA  | Yes | NA  | NA  | Yes        | No  | CS  | Yes | Yes  | NA   | Yes         | Yes      | Acceptable |
| Joundi 2017         | Yes               | Yes                   | NA  | Yes | NA  | NA  | Yes        | No  | CS  | Yes | Yes  | NA   | Yes         | Yes      | Acceptable |
| Kidd 1995           | Yes               | CS                    | NA  | Yes | NA  | NA  | Yes        | No  | CS  | Yes | Yes  | NA   | No          | Yes      | Acceptable |
| Kumar 2016          | Yes               | CS                    | NA  | Yes | NA  | NA  | Yes        | No  | CS  | Yes | Yes  | NA   | No          | Yes      | Acceptable |
| Lakshminarayan 2010 | Yes               | Yes                   | NA  | Yes | NA  | NA  | Yes        | No  | CS  | Yes | Yes  | NA   | Yes         | Yes      | Acceptable |
| Langdon 2007        | Yes               | CS                    | NA  | Yes | NA  | NA  | Yes        | No  | CS  | Yes | Yes  | NA   | No          | Yes      | Acceptable |
| Lim 2001            | Yes               | CS                    | NA  | Yes | NA  | NA  | Yes        | No  | CS  | Yes | Yes  | NA   | No          | Yes      | Acceptable |
| Lord 2014           | Yes               | CS                    | NA  | Yes | NA  | NA  | Yes        | No  | CS  | Yes | Yes  | NA   | No          | Yes      | Acceptable |
| Maeshima 2014       | Yes               | Yes                   | NA  | Yes | NA  | NA  | Yes        | No  | CS  | Yes | Yes  | NA   | Yes         | Yes      | Acceptable |
| Mann 1999           | Yes               | CS                    | NA  | Yes | NA  | NA  | Yes        | No  | CS  | Yes | Yes  | NA   | No          | Yes      | Acceptable |
| Muriana 2016        | Yes               | Yes                   | NA  | Yes | NA  | NA  | Yes        | No  | CS  | Yes | Yes  | NA   | Yes         | Yes      | Acceptable |
| Odderson 1995       | Yes               | CS                    | NA  | Yes | NA  | NA  | Yes        | No  | CS  | Yes | Yes  | NA   | No          | Yes      | Acceptable |
| Palomeras 2014      | Yes               | Yes                   | NA  | Yes | NA  | NA  | Yes        | No  | CS  | Yes | Yes  | NA   | Yes         | Yes      | Acceptable |
| Rofes 2018          | Yes               | Yes                   | NA  | Yes | NA  | NA  | Yes        | No  | CS  | Yes | Yes  | NA   | Yes         | Yes      | Acceptable |
| Sala 1998           | Yes               | Yes                   | NA  | Yes | NA  | NA  | Yes        | No  | CS  | Yes | Yes  | NA   | Yes         | Yes      | Acceptable |
| Smithard 2007       | Yes               | Yes                   | NA  | Yes | NA  | NA  | Yes        | No  | CS  | Yes | Yes  | NA   | Yes         | Yes      | Acceptable |
| Sundar 2007         | Yes               | CS                    | NA  | Yes | NA  | NA  | Yes        | No  | CS  | Yes | Yes  | NA   | No          | Yes      | Acceptable |
| Wade 1987           | Yes               | CS                    | NA  | Yes | NA  | NA  | Yes        | No  | CS  | Yes | Yes  | NA   | No          | Yes      | Acceptable |
| Wang 2001           | Yes               | CS                    | NA  | Yes | NA  | NA  | Yes        | No  | CS  | Yes | Yes  | NA   | No          | Yes      | Acceptable |
| Zhang 2016          | Yes               | CS                    | NA  | Yes | NA  | NA  | Yes        | No  | CS  | Yes | Yes  | NA   | No          | Yes      | Acceptable |

1.1: The study addresses an appropriate and clearly focused question; 1.2: The two groups being studied are selected from source populations that are comparable in all respects other than the factor under investigation; 1.3: The study indicates how many of the people asked to take part did so, in each of the groups being studied; 1.4: The likelihood that some eligible subjects might have the outcome at the time of enrolment is assessed and taken into account in the analysis; 1.5: What percentage of individuals or clusters recruited into each arm of the study dropped out before the study was completed; 1.6: Comparison is made between full participants and those lost to follow up, by exposure status; 1.7: The outcomes are clearly defined; 1.8: The assessment of outcome is made blind to exposure status. If the study is retrospective this may not be applicable; 1.9: Where blinding was not possible, there is some recognition that knowledge of exposure status could have influenced the assessment of outcome; 1.10: The method of assessment of exposure is reliable; 1.11: Evidence from other sources is used to demonstrate that the method of outcome assessment is valid and reliable; 1.12: Exposure level or prognostic factor is assessed more than once; 1.13: The main potential confounders are

identified and taken into account in the design and analysis; 1.14: Have confidence intervals/p value been provided? 2.1: How well was the study done to minimise the risk of bias or confounding?  
CS: Can't say, NA: Not applicable

## Screening

| Author              | Internal validity |                       |     |     |     |     |            |     |     |      |      |      |             |          | Overall ROB  |
|---------------------|-------------------|-----------------------|-----|-----|-----|-----|------------|-----|-----|------|------|------|-------------|----------|--------------|
|                     | Conduct of study  | Selection of subjects |     |     |     |     | Assessment |     |     |      |      |      | Confounding | Analysis |              |
|                     | 1.1               | 1.2                   | 1.3 | 1.4 | 1.5 | 1.6 | 1.7        | 1.8 | 1.9 | 1.10 | 1.11 | 1.12 | 1.13        | 1.14     | 2.1          |
| Al-Khaled 2016      | Yes               | Yes                   | NA  | Yes | NA  | NA  | Yes        | No  | CS  | Yes  | Yes  | NA   | Yes         | Yes      | Acceptable   |
| Bray 2017           | Yes               | Yes                   | NA  | Yes | NA  | NA  | Yes        | No  | CS  | Yes  | Yes  | NA   | Yes         | Yes      | Acceptable   |
| Clements 2009       | Yes               | Yes                   | NA  | Yes | NA  | NA  | Yes        | No  | CS  | Yes  | Yes  | NA   | Yes         | Yes      | Acceptable   |
| Diniz 2009          | Yes               | Yes                   | NA  | Yes | NA  | NA  | Yes        | No  | CS  | Yes  | Yes  | NA   | Yes         | Yes      | High quality |
| Dhufaigh 2017       | Yes               | CS                    | NA  | Yes | NA  | NA  | Yes        | No  | CS  | Yes  | Yes  | NA   | No          | Yes      | Acceptable   |
| Dziewas 2008        | Yes               | Yes                   | NA  | Yes | NA  | NA  | Yes        | No  | CS  | Yes  | Yes  | NA   | Yes         | Yes      | Acceptable   |
| Gandolfi 2014       | Yes               | Yes                   | NA  | Yes | NA  | NA  | Yes        | No  | CS  | Yes  | Yes  | NA   | Yes         | Yes      | Acceptable   |
| Guillan 2015        | Yes               | Yes                   | NA  | Yes | NA  | NA  | Yes        | No  | CS  | Yes  | Yes  | NA   | Yes         | Yes      | Acceptable   |
| Han 2018            | Yes               | Yes                   | NA  | Yes | NA  | NA  | Yes        | No  | CS  | Yes  | Yes  | NA   | Yes         | Yes      | Acceptable   |
| Hincheyn 2005       | Yes               | Yes                   | NA  | Yes | NA  | NA  | Yes        | No  | CS  | Yes  | Yes  | NA   | Yes         | Yes      | Acceptable   |
| Lakshminarayan 2010 | Yes               | Yes                   | NA  | Yes | NA  | NA  | Yes        | No  | CS  | Yes  | Yes  | NA   | Yes         | Yes      | Acceptable   |
| Masrur 2013         | Yes               | Yes                   | NA  | Yes | NA  | NA  | Yes        | No  | CS  | Yes  | Yes  | NA   | Yes         | Yes      | Acceptable   |
| McCormack 2016      | Yes               | Yes                   | NA  | Yes | NA  | NA  | Yes        | No  | CS  | Yes  | Yes  | NA   | Yes         | Yes      | Acceptable   |
| Odderson 1995       | Yes               | Yes                   | NA  | Yes | NA  | NA  | Yes        | No  | CS  | Yes  | Yes  | NA   | Yes         | Yes      | Acceptable   |
| Palli 2017          | Yes               | Yes                   | NA  | Yes | NA  | NA  | Yes        | No  | CS  | Yes  | Yes  | NA   | Yes         | Yes      | Acceptable   |
| Perry 2000          | Yes               | Yes                   | NA  | Yes | NA  | NA  | Yes        | No  | CS  | Yes  | Yes  | NA   | Yes         | Yes      | Acceptable   |
| Schrock 2017        | Yes               | CS                    | NA  | Yes | NA  | NA  | Yes        | No  | CS  | Yes  | Yes  | NA   | No          | Yes      | Acceptable   |
| Sørensen 2013       | Yes               | Yes                   | NA  | Yes | NA  | NA  | Yes        | No  | CS  | Yes  | Yes  | NA   | Yes         | Yes      | Acceptable   |
| Titworth 2013       | Yes               | Yes                   | NA  | Yes | NA  | NA  | Yes        | No  | CS  | Yes  | Yes  | NA   | Yes         | Yes      | Acceptable   |
| Turner 2016         | Yes               | Yes                   | NA  | Yes | NA  | NA  | Yes        | No  | CS  | Yes  | Yes  | NA   | Yes         | Yes      | Acceptable   |
| Yeh 2011            | Yes               | Yes                   | NA  | Yes | NA  | NA  | Yes        | No  | CS  | Yes  | Yes  | NA   | Yes         | Yes      | Acceptable   |

1.1: The study addresses an appropriate and clearly focused question; 1.2: The two groups being studied are selected from source populations that are comparable in all respects other than the factor under investigation; 1.3: The study indicates how many of the people asked to take part did so, in each of the groups being studied; 1.4: The likelihood that some eligible subjects might have the outcome at the time of enrolment is assessed and taken into account in the analysis; 1.5: What percentage of individuals or clusters recruited into each arm of the study dropped out before the study was completed; 1.6: Comparison is made between full participants and those lost to follow up, by exposure status; 1.7: The outcomes are clearly defined; 1.8: The assessment of outcome is made blind to exposure status. If the study is retrospective this may not be applicable; 1.9: Where blinding was not possible, there is some recognition that knowledge of exposure status could have influenced the assessment of outcome; 1.10: The method of assessment of exposure is reliable; 1.11: Evidence from other sources is used to demonstrate that the method of outcome assessment is valid and reliable; 1.12: Exposure level or prognostic factor is assessed more than once; 1.13: The main potential confounders are identified and taken into account in the design and analysis; 1.14: Have confidence intervals/p value been provided? 2.1: How well was the study done to minimise the risk of bias or confounding?  
CS: Can't say, NA: Not applicable

## Assessment

| Author                | Internal validity   |                       |     |     |     |     |            |     |     |      |      |      |             | Overall<br>ROB |            |
|-----------------------|---------------------|-----------------------|-----|-----|-----|-----|------------|-----|-----|------|------|------|-------------|----------------|------------|
|                       | Conduct<br>of study | Selection of subjects |     |     |     |     | Assessment |     |     |      |      |      | Confounding |                | Analysis   |
|                       | 1.1                 | 1.2                   | 1.3 | 1.4 | 1.5 | 1.6 | 1.7        | 1.8 | 1.9 | 1.10 | 1.11 | 1.12 | 1.13        | 1.14           | 2.1        |
| Bax 2014              | Yes                 | Yes                   | NA  | Yes | NA  | NA  | Yes        | No  | CS  | Yes  | Yes  | NA   | Yes         | Yes            | Acceptable |
| Bray 2017             | Yes                 | Yes                   | NA  | Yes | NA  | NA  | Yes        | No  | CS  | Yes  | Yes  | NA   | Yes         | Yes            | Acceptable |
| Radhakrishnan<br>2013 | Yes                 | Yes                   | NA  | Yes | NA  | NA  | Yes        | No  | CS  | Yes  | Yes  | NA   | Yes         | Yes            | Acceptable |
| Dhufaigh 2017         | Yes                 | CS                    | NA  | Yes | NA  | NA  | Yes        | No  | CS  | Yes  | Yes  | NA   | No          | Yes            | Acceptable |

1.1: The study addresses an appropriate and clearly focused question; 1.2: The two groups being studied are selected from source populations that are comparable in all respects other than the factor under investigation; 1.3: The study indicates how many of the people asked to take part did so, in each of the groups being studied; 1.4: The likelihood that some eligible subjects might have the outcome at the time of enrolment is assessed and taken into account in the analysis; 1.5: What percentage of individuals or clusters recruited into each arm of the study dropped out before the study was completed; 1.6: Comparison is made between full participants and those lost to follow up, by exposure status; 1.7: The outcomes are clearly defined; 1.8: The assessment of outcome is made blind to exposure status. If the study is retrospective this may not be applicable; 1.9: Where blinding was not possible, there is some recognition that knowledge of exposure status could have influenced the assessment of outcome; 1.10: The method of assessment of exposure is reliable; 1.11: Evidence from other sources is used to demonstrate that the method of outcome assessment is valid and reliable; 1.12: Exposure level or prognostic factor is assessed more than once; 1.13: The main potential confounders are identified and taken into account in the design and analysis; 1.14: Have confidence intervals/p value been provided? 2.1: How well was the study done to minimise the risk of bias or confounding?  
CS: Can't say, NA: Not applicable

## Treatments

### 1. Dietary Interventions

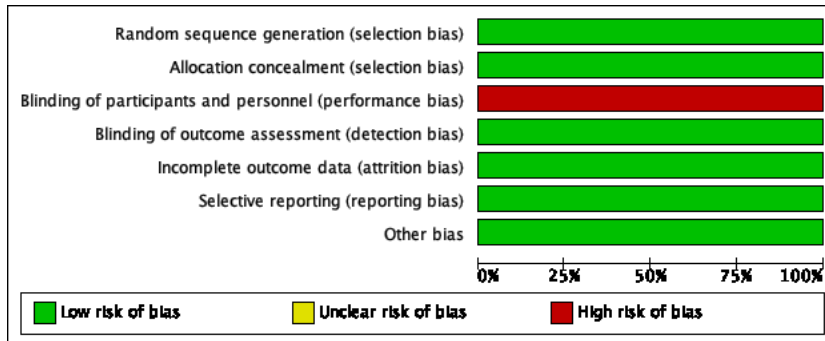

### Risk of bias summary, Consistency modification

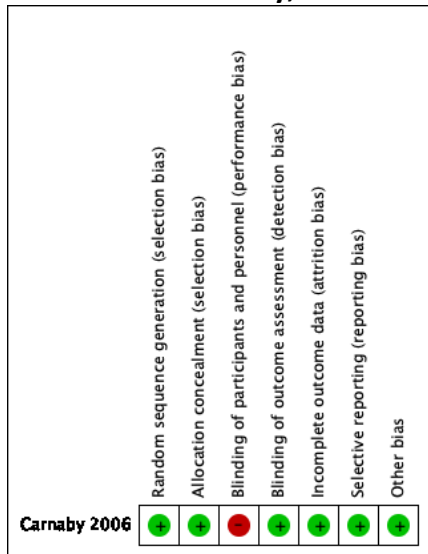

### Risk of bias assessment of non-randomized studies using SIGN 50 checklist, Consistency modification

| Author     | Conduct of study | Internal validity     |     |     |     |     |            |     |     |      |      |      | Overall ROB |             |            |
|------------|------------------|-----------------------|-----|-----|-----|-----|------------|-----|-----|------|------|------|-------------|-------------|------------|
|            |                  | Selection of subjects |     |     |     |     | Assessment |     |     |      |      |      |             | Confounding | Analysis   |
|            | 1.1              | 1.2                   | 1.3 | 1.4 | 1.5 | 1.6 | 1.7        | 1.8 | 1.9 | 1.10 | 1.11 | 1.12 | 1.13        | 1.14        | 2.1        |
| Foley 2006 | Yes              | CS                    | NA  | Yes | NA  | NA  | Yes        | No  | CS  | Yes  | Yes  | NA   | No          | Yes         | Acceptable |

1.1: The study addresses an appropriate and clearly focused question; 1.2: The two groups being studied are selected from source populations that are comparable in all respects other than the factor under investigation; 1.3: The study indicates how many of the people asked to take part did so, in each of the groups being studied; 1.4: The likelihood that some eligible subjects might have the outcome at the time of enrolment is assessed and taken into account in the analysis; 1.5: What percentage of individuals or clusters recruited into each arm of the study dropped out before the study was completed; 1.6: Comparison is made between full participants and those lost to follow up, by exposure status; 1.7: The outcomes are clearly defined; 1.8: The assessment of outcome is made blind to exposure status. If the study is retrospective this may not be applicable; 1.9: Where blinding was not possible, there is some recognition that knowledge of exposure status could have influenced the assessment of outcome; 1.10: The method of assessment of exposure is reliable; 1.11: Evidence from other sources is used to demonstrate that the method of outcome assessment is valid and reliable; 1.12: Exposure level or prognostic factor is assessed more than once; 1.13: The main potential confounders are

identified and taken into account in the design and analysis; 1.14: Have confidence intervals/p value been provided? 2.1: How well was the study done to minimise the risk of bias or confounding?  
 CS: Can't say, NA: Not applicable

### Risk of bias graph, Fluid thickening

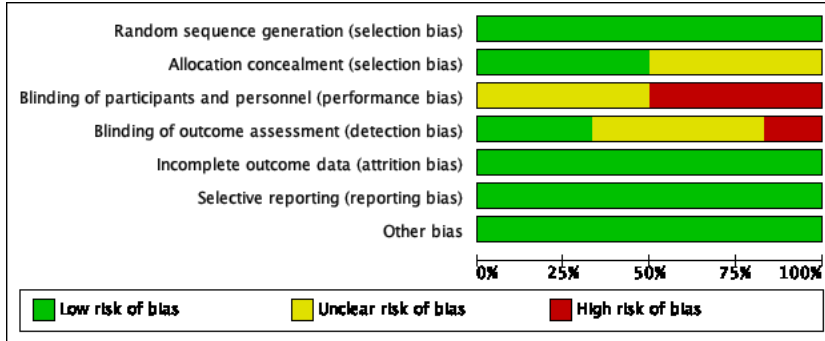

### Risk of bias summary, Fluid thickening

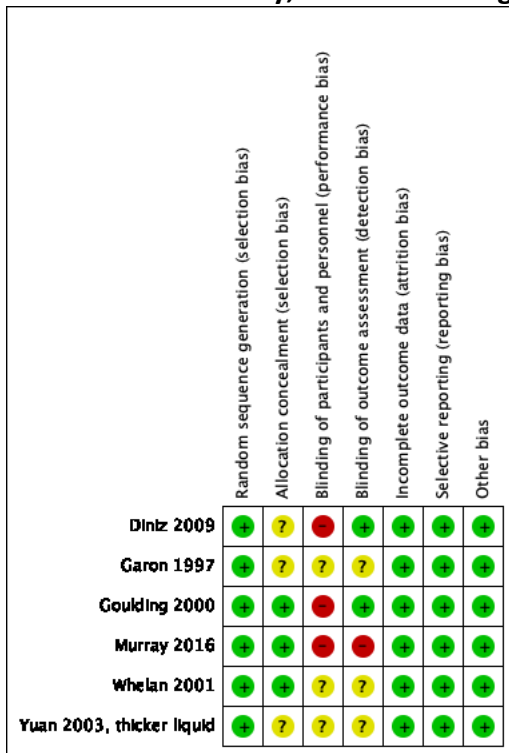



## 2a. Behavioural interventions

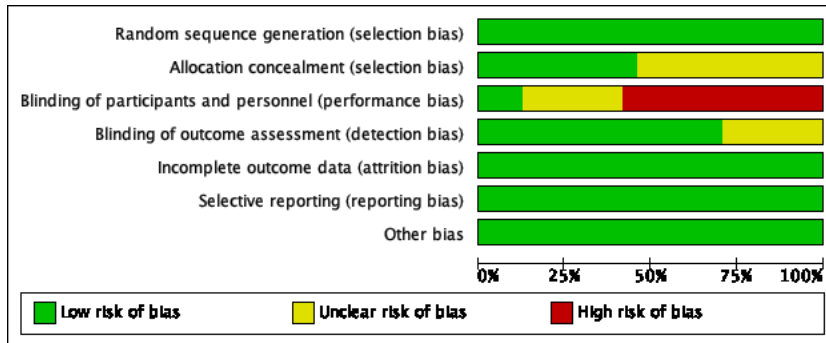

Risk of bias summary, Behavioural Interventions

|                           | Random sequence generation (selection bias) | Allocation concealment (selection bias) | Blinding of participants and personnel (performance bias) | Blinding of outcome assessment (detection bias) | Incomplete outcome data (attrition bias) | Selective reporting (reporting bias) | Other bias |
|---------------------------|---------------------------------------------|-----------------------------------------|-----------------------------------------------------------|-------------------------------------------------|------------------------------------------|--------------------------------------|------------|
| Bakhtiyari 2015a          | +                                           | +                                       | +                                                         | +                                               | +                                        | +                                    | +          |
| Carnaby 2006              | +                                           | +                                       | +                                                         | +                                               | +                                        | +                                    | +          |
| Choi 2017                 | +                                           | ?                                       | ?                                                         | ?                                               | +                                        | +                                    | +          |
| DePippo 1994 Thera        | +                                           | ?                                       | ?                                                         | ?                                               | +                                        | +                                    | +          |
| EOM 2017                  | +                                           | ?                                       | +                                                         | +                                               | +                                        | +                                    | +          |
| Fraga 2017                | +                                           | ?                                       | ?                                                         | +                                               | +                                        | +                                    | +          |
| Gao 2017 Shaker           | +                                           | ?                                       | ?                                                         | +                                               | +                                        | +                                    | +          |
| Gullén-Solà 2017          | +                                           | +                                       | +                                                         | +                                               | +                                        | +                                    | +          |
| Heo 2015                  | +                                           | ?                                       | +                                                         | ?                                               | +                                        | +                                    | +          |
| Kim 2015, Shaker          | +                                           | ?                                       | ?                                                         | ?                                               | +                                        | +                                    | +          |
| Kim 2017                  | +                                           | +                                       | ?                                                         | ?                                               | +                                        | +                                    | +          |
| Kim 2018                  | +                                           | ?                                       | +                                                         | +                                               | +                                        | +                                    | +          |
| Koyama 2017               | +                                           | +                                       | +                                                         | +                                               | +                                        | +                                    | +          |
| Kulnik 2015               | +                                           | +                                       | +                                                         | +                                               | +                                        | +                                    | +          |
| Lee 2015, ACE             | +                                           | +                                       | +                                                         | +                                               | +                                        | +                                    | +          |
| Messaggi-Sartor 2015, Exe | +                                           | +                                       | +                                                         | +                                               | +                                        | +                                    | +          |
| Moon 2017                 | +                                           | ?                                       | +                                                         | ?                                               | +                                        | +                                    | +          |
| Moon 2018, Tongue Exer    | +                                           | +                                       | +                                                         | +                                               | +                                        | +                                    | +          |
| Park 2015, Tongue         | +                                           | ?                                       | +                                                         | +                                               | +                                        | +                                    | +          |
| Park 2016, EMST           | +                                           | +                                       | +                                                         | +                                               | +                                        | +                                    | +          |
| Park 2017, Shaker         | +                                           | ?                                       | ?                                                         | ?                                               | +                                        | +                                    | +          |
| Park 2018, CTAR           | +                                           | ?                                       | +                                                         | +                                               | +                                        | +                                    | +          |
| Power 2006, Oral stimul   | +                                           | ?                                       | +                                                         | +                                               | +                                        | +                                    | +          |
| Steele 2016               | +                                           | +                                       | +                                                         | +                                               | +                                        | +                                    | +          |

## Risk of bias assessment of non-randomized studies using SIGN 50 checklist, Behavioural Interventions

| Author    | Internal validity |                       |     |     |     |     |            |     |     |      |      |      |             |          | Overall ROB |
|-----------|-------------------|-----------------------|-----|-----|-----|-----|------------|-----|-----|------|------|------|-------------|----------|-------------|
|           | Conduct of study  | Selection of subjects |     |     |     |     | Assessment |     |     |      |      |      | Confounding | Analysis |             |
|           | 1.1               | 1.2                   | 1.3 | 1.4 | 1.5 | 1.6 | 1.7        | 1.8 | 1.9 | 1.10 | 1.11 | 1.12 | 1.13        | 1.14     | 2.1         |
| Kang 2012 | Yes               | Yes                   | NA  | Yes | NA  | NA  | Yes        | No  | CS  | Yes  | Yes  | NA   | Yes         | Yes      | Acceptable  |
| Kim 2015  | Yes               | Yes                   | NA  | Yes | NA  | NA  | Yes        | No  | CS  | Yes  | Yes  | NA   | Yes         | Yes      | Acceptable  |
| Li 2016   | Yes               | Yes                   | NA  | Yes | NA  | NA  | Yes        | No  | CS  | Yes  | Yes  | NA   | Yes         | Yes      | Acceptable  |
| Lin 2003  | Yes               | Yes                   | NA  | Yes | NA  | NA  | Yes        | No  | CS  | Yes  | Yes  | NA   | Yes         | Yes      | Acceptable  |

1.1: The study addresses an appropriate and clearly focused question; 1.2: The two groups being studied are selected from source populations that are comparable in all respects other than the factor under investigation; 1.3: The study indicates how many of the people asked to take part did so, in each of the groups being studied; 1.4: The likelihood that some eligible subjects might have the outcome at the time of enrolment is assessed and taken into account in the analysis; 1.5: What percentage of individuals or clusters recruited into each arm of the study dropped out before the study was completed; 1.6: Comparison is made between full participants and those lost to follow up, by exposure status; 1.7: The outcomes are clearly defined; 1.8: The assessment of outcome is made blind to exposure status. If the study is retrospective this may not be applicable; 1.9: Where blinding was not possible, there is some recognition that knowledge of exposure status could have influenced the assessment of outcome; 1.10: The method of assessment of exposure is reliable; 1.11: Evidence from other sources is used to demonstrate that the method of outcome assessment is valid and reliable; 1.12: Exposure level or prognostic factor is assessed more than once; 1.13: The main potential confounders are identified and taken into account in the design and analysis; 1.14: Have confidence intervals/p value been provided? 2.1: How well was the study done to minimise the risk of bias or confounding?  
CS: Can't say, NA: Not applicable

## 2.b Acupuncture

### Risk of Bias of RCT

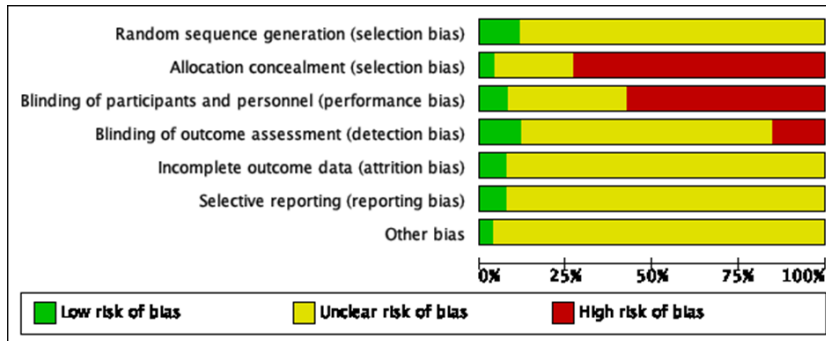

Risk of bias summary, Acupuncture

|                 | Random sequence generation (selection bias) | Allocation concealment (selection bias) | Blinding of participants and personnel (performance bias) | Blinding of outcome assessment (detection bias) | Incomplete outcome data (attrition bias) | Selective reporting (reporting bias) | Other bias |
|-----------------|---------------------------------------------|-----------------------------------------|-----------------------------------------------------------|-------------------------------------------------|------------------------------------------|--------------------------------------|------------|
| Bai 2007        | ?                                           | ?                                       | ?                                                         | ?                                               | ?                                        | ?                                    | ?          |
| Chan 2012       | ?                                           | +                                       | +                                                         | ?                                               | ?                                        | ?                                    | ?          |
| Chang 2014, Ac  | ?                                           | +                                       | ?                                                         | ?                                               | ?                                        | ?                                    | ?          |
| Chen 2016, Ac   | ?                                           | ?                                       | +                                                         | +                                               | +                                        | ?                                    | ?          |
| Cheng 2014      | ?                                           | ?                                       | ?                                                         | ?                                               | ?                                        | ?                                    | ?          |
| Chu 2017, Ac    | ?                                           | +                                       | +                                                         | +                                               | ?                                        | ?                                    | ?          |
| Fan 2007, Ac    | ?                                           | +                                       | +                                                         | +                                               | ?                                        | ?                                    | ?          |
| Feng 2016       | ?                                           | +                                       | +                                                         | +                                               | ?                                        | ?                                    | ?          |
| Han 2004        | +                                           | +                                       | ?                                                         | ?                                               | +                                        | +                                    | +          |
| Huang 2008, Ac  | ?                                           | ?                                       | ?                                                         | ?                                               | ?                                        | ?                                    | ?          |
| Huang 2010      | ?                                           | +                                       | +                                                         | ?                                               | ?                                        | ?                                    | ?          |
| Jia 2006        | ?                                           | +                                       | +                                                         | ?                                               | ?                                        | ?                                    | ?          |
| Jin 2010, Acupu | ?                                           | +                                       | +                                                         | ?                                               | ?                                        | ?                                    | ?          |
| Kikuchi 2014    | +                                           | +                                       | ?                                                         | ?                                               | ?                                        | ?                                    | ?          |
| Liu 2000        | ?                                           | ?                                       | ?                                                         | ?                                               | ?                                        | ?                                    | ?          |
| Liu 2004        | ?                                           | +                                       | ?                                                         | ?                                               | ?                                        | ?                                    | ?          |
| Liu 2012, Ac    | ?                                           | +                                       | +                                                         | ?                                               | ?                                        | ?                                    | ?          |
| Liu 2019        | ?                                           | +                                       | +                                                         | +                                               | ?                                        | ?                                    | ?          |
| Ma 2014         | ?                                           | +                                       | +                                                         | ?                                               | ?                                        | ?                                    | ?          |
| Ma 2015, Ac     | ?                                           | +                                       | +                                                         | ?                                               | ?                                        | ?                                    | ?          |
| Meng 2015, Ac   | ?                                           | +                                       | +                                                         | ?                                               | ?                                        | ?                                    | ?          |
| Wu 2011         | ?                                           | ?                                       | ?                                                         | ?                                               | ?                                        | ?                                    | ?          |
| Xia 2016, Ac    | +                                           | +                                       | +                                                         | ?                                               | ?                                        | ?                                    | ?          |
| Yin 2013        | ?                                           | +                                       | +                                                         | ?                                               | ?                                        | ?                                    | ?          |
| Zheng 2011, Ac  | ?                                           | +                                       | ?                                                         | ?                                               | ?                                        | ?                                    | ?          |
| Zhou 2013       | ?                                           | +                                       | +                                                         | ?                                               | ?                                        | ?                                    | ?          |

### 3. Nutritional Interventions

#### Risk of bias graph, Early vs Late oral nutrition

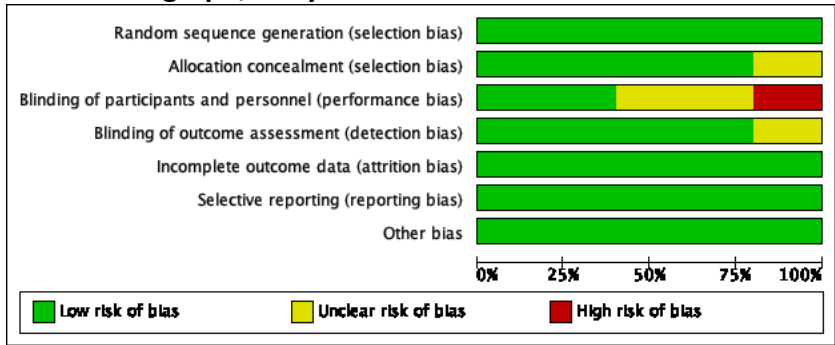

#### Risk of bias summary, Early vs Late oral nutrition

|                       | Random sequence generation (selection bias) | Allocation concealment (selection bias) | Blinding of participants and personnel (performance bias) | Blinding of outcome assessment (detection bias) | Incomplete outcome data (attrition bias) | Selective reporting (reporting bias) | Other bias |
|-----------------------|---------------------------------------------|-----------------------------------------|-----------------------------------------------------------|-------------------------------------------------|------------------------------------------|--------------------------------------|------------|
| <b>Aquilani 2008</b>  | +                                           | +                                       | +                                                         | +                                               | +                                        | +                                    | +          |
| <b>Dennis 2006</b>    | +                                           | +                                       | ?                                                         | +                                               | +                                        | +                                    | +          |
| <b>Garibella 1998</b> | +                                           | ?                                       | ?                                                         | ?                                               | +                                        | +                                    | +          |
| <b>Ha 2001</b>        | +                                           | +                                       | ●                                                         | +                                               | +                                        | +                                    | +          |
| <b>Rabade 2008</b>    | +                                           | +                                       | +                                                         | +                                               | +                                        | +                                    | +          |

### Risk of Bias of RCT

#### Risk of bias graph, Early vs Late Enteral or Parenteral Nutrition

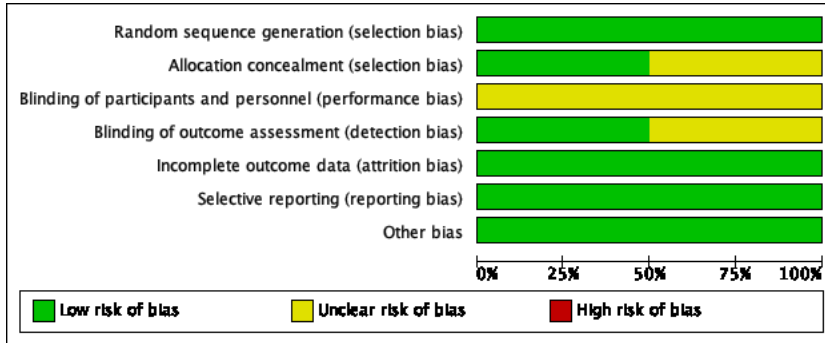

#### Risk of bias summary, Early vs Late Enteral or Parenteral Nutrition

|             | Random sequence generation (selection bias) | Allocation concealment (selection bias) | Blinding of participants and personnel (performance bias) | Blinding of outcome assessment (detection bias) | Incomplete outcome data (attrition bias) | Selective reporting (reporting bias) | Other bias |
|-------------|---------------------------------------------|-----------------------------------------|-----------------------------------------------------------|-------------------------------------------------|------------------------------------------|--------------------------------------|------------|
| Dennis 2005 | +                                           | +                                       | ?                                                         | ?                                               | +                                        | +                                    | +          |
| Zheng 2015  | +                                           | ?                                       | ?                                                         | +                                               | +                                        | +                                    | +          |

#### 4. Oral Health Interventions

##### Risk of bias graph, Oral health

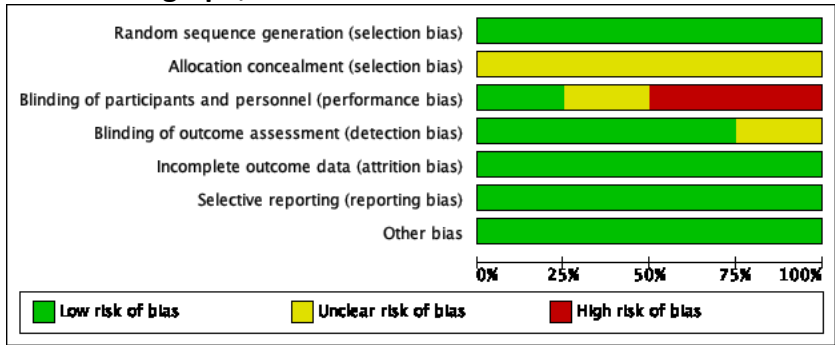

##### Risk of bias summary, Oral health

|               | Random sequence generation (selection bias) | Allocation concealment (selection bias) | Blinding of participants and personnel (performance bias) | Blinding of outcome assessment (detection bias) | Incomplete outcome data (attrition bias) | Selective reporting (reporting bias) | Other bias |
|---------------|---------------------------------------------|-----------------------------------------|-----------------------------------------------------------|-------------------------------------------------|------------------------------------------|--------------------------------------|------------|
| Chipp 2014    | +                                           | ?                                       | ?                                                         | +                                               | +                                        | +                                    | +          |
| Gosney 2006   | +                                           | ?                                       | +                                                         | +                                               | +                                        | +                                    | +          |
| Kuo 2015      | +                                           | ?                                       | +                                                         | ?                                               | +                                        | +                                    | +          |
| Lam 2013, OHI | +                                           | ?                                       | +                                                         | +                                               | +                                        | +                                    | +          |



**Risk of bias assessment of non-randomized studies using SIGN 50 checklist, Oral health**

| Author        | Internal validity |                       |     |     |     |     |            |     |     |      |      |      |             |          | Overall    |
|---------------|-------------------|-----------------------|-----|-----|-----|-----|------------|-----|-----|------|------|------|-------------|----------|------------|
|               | Conduct of study  | Selection of subjects |     |     |     |     | Assessment |     |     |      |      |      | Confounding | Analysis | ROB        |
|               | 1.1               | 1.2                   | 1.3 | 1.4 | 1.5 | 1.6 | 1.7        | 1.8 | 1.9 | 1.10 | 1.11 | 1.12 | 1.13        | 1.14     | 2.1        |
| Murray 2018   | Yes               | Yes                   | NA  | Yes | NA  | NA  | Yes        | No  | CS  | Yes  | Yes  | NA   | Yes         | Yes      | Acceptable |
| Sørensen 2013 | Yes               | Yes                   | NA  | Yes | NA  | NA  | Yes        | No  | CS  | Yes  | Yes  | NA   | Yes         | Yes      | Acceptable |
| Wagner 2016   | Yes               | Yes                   | NA  | Yes | NA  | NA  | Yes        | No  | CS  | Yes  | Yes  | NA   | Yes         | Yes      | Acceptable |
| Talley 2015   | Yes               | CS                    | NA  | Yes | NA  | NA  | Yes        | No  | CS  | Yes  | Yes  | NA   | No          | Yes      | Acceptable |

1.1: The study addresses an appropriate and clearly focused question; 1.2: The two groups being studied are selected from source populations that are comparable in all respects other than the factor under investigation; 1.3: The study indicates how many of the people asked to take part did so, in each of the groups being studied; 1.4: The likelihood that some eligible subjects might have the outcome at the time of enrolment is assessed and taken into account in the analysis; 1.5: What percentage of individuals or clusters recruited into each arm of the study dropped out before the study was completed; 1.6: Comparison is made between full participants and those lost to follow up, by exposure status; 1.7: The outcomes are clearly defined; 1.8: The assessment of outcome is made blind to exposure status. If the study is retrospective this may not be applicable; 1.9: Where blinding was not possible, there is some recognition that knowledge of exposure status could have influenced the assessment of outcome; 1.10: The method of assessment of exposure is reliable; 1.11: Evidence from other sources is used to demonstrate that the method of outcome assessment is valid and reliable; 1.12: Exposure level or prognostic factor is assessed more than once; 1.13: The main potential confounders are identified and taken into account in the design and analysis; 1.14: Have confidence intervals/p value been provided? 2.1: How well was the study done to minimise the risk of bias or confounding?

CS: Can't say, NA: Not applicable

## 5. Pharmacological Interventions

### Risk of bias graph, Drugs

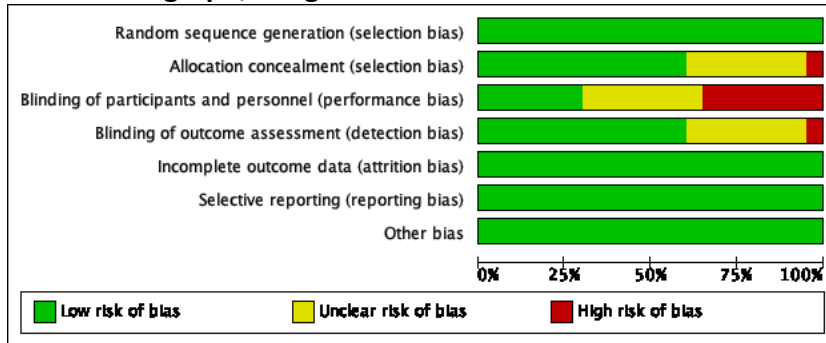

### Risk of bias summary, Drugs

|                             | Random sequence generation (selection bias) | Allocation concealment (selection bias) | Blinding of participants and personnel (performance bias) | Blinding of outcome assessment (detection bias) | Incomplete outcome data (attrition bias) | Selective reporting (reporting bias) | Other bias |
|-----------------------------|---------------------------------------------|-----------------------------------------|-----------------------------------------------------------|-------------------------------------------------|------------------------------------------|--------------------------------------|------------|
| Aral 2003, Cabergoline      | +                                           | ?                                       | ?                                                         | ?                                               | +                                        | +                                    | +          |
| Aral 2003, Imidapril        | +                                           | ?                                       | ?                                                         | ?                                               | +                                        | +                                    | +          |
| Chamorro 2005, Antibio      | +                                           | +                                       | +                                                         | +                                               | +                                        | +                                    | +          |
| Chen 2017a                  | +                                           | ?                                       | +                                                         | +                                               | +                                        | +                                    | +          |
| De Falco 1998, Antibio      | +                                           | ?                                       | ?                                                         | ?                                               | +                                        | +                                    | +          |
| Ebihara 2005, Capsaicin     | +                                           | ?                                       | +                                                         | ?                                               | +                                        | +                                    | +          |
| Ebihara 2006, Pepper oil    | +                                           | ?                                       | +                                                         | +                                               | +                                        | +                                    | +          |
| Harms 2008, Antibio         | +                                           | ?                                       | +                                                         | +                                               | +                                        | +                                    | +          |
| Kaira 2015, Antibio         | +                                           | +                                       | ?                                                         | +                                               | +                                        | +                                    | +          |
| Kanda 2004, Amant+Imidapril | +                                           | +                                       | ?                                                         | ?                                               | +                                        | +                                    | +          |
| Lee 2015, ACE               | +                                           | +                                       | +                                                         | +                                               | +                                        | +                                    | +          |
| Nakagawa 1999, Amantadine   | +                                           | +                                       | ?                                                         | ?                                               | +                                        | +                                    | +          |
| Ohkubo 2004, Progress       | +                                           | +                                       | +                                                         | +                                               | +                                        | +                                    | +          |
| Perez 1998, Nifedipine      | +                                           | +                                       | +                                                         | +                                               | +                                        | +                                    | +          |
| Rofes 2014, Piperine        | +                                           | +                                       | +                                                         | +                                               | +                                        | +                                    | +          |
| Schwarz 2008, Antibio       | +                                           | +                                       | +                                                         | +                                               | +                                        | +                                    | +          |
| Ulm 2017, Antibiotics       | +                                           | +                                       | +                                                         | +                                               | +                                        | +                                    | +          |
| Warusevitane 2015, metoclo  | +                                           | +                                       | +                                                         | +                                               | +                                        | +                                    | +          |
| Westendorp 2015, Antibio    | +                                           | +                                       | +                                                         | +                                               | +                                        | +                                    | +          |
| Yusuf 2008, Profess-Telmi   | +                                           | +                                       | ?                                                         | ?                                               | +                                        | +                                    | +          |

### Risk of bias assessment of non-randomized studies using SIGN 50 checklist, Drugs

| Author       | Internal validity |                       |     |     |     |     |            |     |     |      |      |      |             |          | Overall    |
|--------------|-------------------|-----------------------|-----|-----|-----|-----|------------|-----|-----|------|------|------|-------------|----------|------------|
|              | Conduct of study  | Selection of subjects |     |     |     |     | Assessment |     |     |      |      |      | Confounding | Analysis | ROB        |
|              | 1.1               | 1.2                   | 1.3 | 1.4 | 1.5 | 1.6 | 1.7        | 1.8 | 1.9 | 1.10 | 1.11 | 1.12 | 1.13        | 1.14     | 2.1        |
| Arai 2005    | Yes               | Yes                   | NA  | Yes | NA  | NA  | Yes        | No  | CS  | Yes  | Yes  | NA   | Yes         | Yes      | Acceptable |
| Arai 2001    | Yes               | Yes                   | NA  | Yes | NA  | NA  | Yes        | No  | CS  | Yes  | Yes  | NA   | Yes         | Yes      | Acceptable |
| Arai 1998    | Yes               | Yes                   | NA  | Yes | NA  | NA  | Yes        | No  | CS  | Yes  | Yes  | NA   | Yes         | Yes      | Acceptable |
| Arai 2000    | Yes               | Yes                   | NA  | Yes | NA  | NA  | Yes        | No  | CS  | Yes  | Yes  | NA   | Yes         | Yes      | Acceptable |
| Arai 1998    | Yes               | Yes                   | NA  | Yes | NA  | NA  | Yes        | No  | CS  | Yes  | Yes  | NA   | Yes         | Yes      | Acceptable |
| Cuifang 2010 | Yes               | Yes                   | NA  | Yes | NA  | NA  | Yes        | No  | CS  | Yes  | Yes  | NA   | Yes         | Yes      | Acceptable |
| Ebihara 1993 | Yes               | Yes                   | NA  | Yes | NA  | NA  | Yes        | No  | CS  | Yes  | Yes  | NA   | Yes         | Yes      | Acceptable |
| Ebihara 2010 | Yes               | Yes                   | NA  | Yes | NA  | NA  | Yes        | No  | CS  | Yes  | Yes  | NA   | Yes         | Yes      | Acceptable |
| Harda 2006   | Yes               | Yes                   | NA  | Yes | NA  | NA  | Yes        | No  | CS  | Yes  | Yes  | NA   | Yes         | Yes      | Acceptable |
| Rofes 2013   | Yes               | Yes                   | NA  | Yes | NA  | NA  | Yes        | No  | CS  | Yes  | Yes  | NA   | Yes         | Yes      | Acceptable |

1.1: The study addresses an appropriate and clearly focused question; 1.2: The two groups being studied are selected from source populations that are comparable in all respects other than the factor under investigation; 1.3: The study indicates how many of the people asked to take part did so, in each of the groups being studied; 1.4: The likelihood that some eligible subjects might have the outcome at the time of enrolment is assessed and taken into account in the analysis; 1.5: What percentage of individuals or clusters recruited into each arm of the study dropped out before the study was completed; 1.6: Comparison is made between full participants and those lost to follow up, by exposure status; 1.7: The outcomes are clearly defined; 1.8: The assessment of outcome is made blind to exposure status. If the study is retrospective this may not be applicable; 1.9: Where blinding was not possible, there is some recognition that knowledge of exposure status could have influenced the assessment of outcome; 1.10: The method of assessment of exposure is reliable; 1.11: Evidence from other sources is used to demonstrate that the method of outcome assessment is valid and reliable; 1.12: Exposure level or prognostic factor is assessed more than once; 1.13: The main potential confounders are identified and taken into account in the design and analysis; 1.14: Have confidence intervals/p value been provided? 2.1: How well was the study done to minimise the risk of bias or confounding?

CS: Can't say, NA: Not applicable

## 6. Neurostimulation

### Risk of bias graph, Stimulation

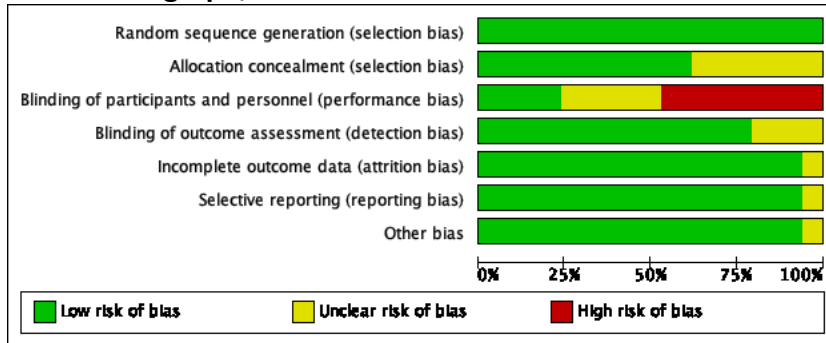

### Risk of bias summary, Stimulation

|                           | Random sequence generation (selection bias) | Allocation concealment (selection bias) | Blinding of participants and personnel (performance bias) | Blinding of outcome assessment (detection bias) | Incomplete outcome data (attrition bias) | Selective reporting (reporting bias) | Other bias |
|---------------------------|---------------------------------------------|-----------------------------------------|-----------------------------------------------------------|-------------------------------------------------|------------------------------------------|--------------------------------------|------------|
| Ahn 2017, tDCS            | +                                           | ?                                       | +                                                         | +                                               | +                                        | +                                    | +          |
| Arreola 2018a             | +                                           | ?                                       | ?                                                         | ?                                               | ?                                        | ?                                    | ?          |
| Bath 2016                 | +                                           | +                                       | +                                                         | +                                               | +                                        | +                                    | +          |
| Bulow 2008                | +                                           | +                                       | +                                                         | +                                               | +                                        | +                                    | +          |
| Du 2016, rTMS, 3H         | +                                           | +                                       | +                                                         | +                                               | +                                        | +                                    | +          |
| Dziewas 2018              | +                                           | +                                       | +                                                         | +                                               | +                                        | +                                    | +          |
| Gullén-Solà 2017          | +                                           | +                                       | +                                                         | +                                               | +                                        | +                                    | +          |
| Jayasekeran 2010, PES     | +                                           | +                                       | +                                                         | +                                               | +                                        | +                                    | +          |
| Khedr 2009, rTMS          | +                                           | +                                       | +                                                         | +                                               | +                                        | +                                    | +          |
| Khedr 2010, rTMS          | +                                           | +                                       | +                                                         | +                                               | +                                        | +                                    | +          |
| Kim 2011 rTMS             | +                                           | ?                                       | ?                                                         | ?                                               | +                                        | +                                    | +          |
| Ko 2016, tDCS             | +                                           | ?                                       | ?                                                         | ?                                               | ?                                        | ?                                    | ?          |
| Kumar 2011                | +                                           | +                                       | +                                                         | +                                               | +                                        | +                                    | +          |
| Lee 2014, NMES            | +                                           | +                                       | ?                                                         | ?                                               | +                                        | +                                    | +          |
| Li 2015, VitalStim vs TT  | +                                           | ?                                       | +                                                         | +                                               | +                                        | +                                    | +          |
| Ljm 2009                  | +                                           | ?                                       | ?                                                         | +                                               | +                                        | +                                    | +          |
| Ljm 2014, NMES            | +                                           | ?                                       | ?                                                         | +                                               | +                                        | +                                    | +          |
| Meng 2017, NMESa          | +                                           | ?                                       | ?                                                         | ?                                               | +                                        | +                                    | +          |
| Michou 2014, PES          | +                                           | +                                       | ?                                                         | +                                               | +                                        | +                                    | +          |
| Park 2013, rTMS           | +                                           | +                                       | +                                                         | +                                               | +                                        | +                                    | +          |
| Park 2016, NMES           | +                                           | +                                       | +                                                         | +                                               | +                                        | +                                    | +          |
| Park 2016, rTMS           | +                                           | +                                       | +                                                         | +                                               | +                                        | +                                    | +          |
| Shigematsu 2013, tDCS     | +                                           | +                                       | +                                                         | +                                               | +                                        | +                                    | +          |
| Singh 2006 PES            | +                                           | +                                       | ?                                                         | ?                                               | +                                        | +                                    | +          |
| Sproson 2018, NMES        | +                                           | +                                       | +                                                         | +                                               | +                                        | +                                    | +          |
| Suntrup-Krueger 2015, PES | +                                           | +                                       | +                                                         | +                                               | +                                        | +                                    | +          |
| Suntrup-Krueger 2018      | +                                           | +                                       | +                                                         | +                                               | +                                        | +                                    | +          |
| Terre 2015, NMES          | +                                           | ?                                       | +                                                         | +                                               | +                                        | +                                    | +          |
| Umay 2017, SES            | +                                           | +                                       | +                                                         | +                                               | +                                        | +                                    | +          |
| Vasant 2016, PES          | +                                           | +                                       | +                                                         | +                                               | +                                        | +                                    | +          |
| Xia 2011, Vitalstim       | +                                           | ?                                       | +                                                         | +                                               | +                                        | +                                    | +          |
| Yang 2012, tDCS           | +                                           | ?                                       | +                                                         | +                                               | +                                        | +                                    | +          |
| Zeng 2018                 | +                                           | ?                                       | +                                                         | +                                               | +                                        | +                                    | +          |
| Zhang 2016, NMES          | +                                           | ?                                       | ?                                                         | ?                                               | +                                        | +                                    | +          |

Supplement 6: GRADE profiles

Epidemiology

| Certainty assessment |              |              |               |              |             |                      | № of patients |              | Effect            |                   | Certainty | Importance |
|----------------------|--------------|--------------|---------------|--------------|-------------|----------------------|---------------|--------------|-------------------|-------------------|-----------|------------|
| № of studies         | Study design | Risk of bias | Inconsistency | Indirectness | Imprecision | Other considerations | Dysphagia     | No Dysphagia | Relative (95% CI) | Absolute (95% CI) |           |            |

Overall Mortality

|    |                       |             |                      |             |             |                         |                      |                    |                         |                                               |                                                                                              |          |
|----|-----------------------|-------------|----------------------|-------------|-------------|-------------------------|----------------------|--------------------|-------------------------|-----------------------------------------------|----------------------------------------------------------------------------------------------|----------|
| 22 | observational studies | not serious | serious <sup>a</sup> | not serious | not serious | very strong association | 28314/142570 (19.9%) | 9737/558898 (1.7%) | OR 7.73 (4.68 to 12.76) | 103 more per 1,000 (from 59 more to 167 more) |  MODERATE | CRITICAL |
|----|-----------------------|-------------|----------------------|-------------|-------------|-------------------------|----------------------|--------------------|-------------------------|-----------------------------------------------|----------------------------------------------------------------------------------------------|----------|

mRS 0-1

|   |                       |             |                      |             |             |                                                                          |                 |                  |                        |                                                   |                                                                                         |          |
|---|-----------------------|-------------|----------------------|-------------|-------------|--------------------------------------------------------------------------|-----------------|------------------|------------------------|---------------------------------------------------|-----------------------------------------------------------------------------------------|----------|
| 2 | observational studies | not serious | serious <sup>a</sup> | not serious | not serious | publication bias strongly suspected very strong association <sup>b</sup> | 150/2514 (6.0%) | 927/3068 (30.2%) | OR 0.20 (0.11 to 0.35) | 222 fewer per 1,000 (from 257 fewer to 171 fewer) |  LOW | CRITICAL |
|---|-----------------------|-------------|----------------------|-------------|-------------|--------------------------------------------------------------------------|-----------------|------------------|------------------------|---------------------------------------------------|-----------------------------------------------------------------------------------------|----------|

Pneumonia

|    |                       |             |                      |             |             |                         |                      |                     |                        |                                                |                                                                                                |          |
|----|-----------------------|-------------|----------------------|-------------|-------------|-------------------------|----------------------|---------------------|------------------------|------------------------------------------------|------------------------------------------------------------------------------------------------|----------|
| 33 | observational studies | not serious | serious <sup>a</sup> | not serious | not serious | very strong association | 35157/156312 (22.5%) | 15345/610867 (2.5%) | OR 7.45 (6.01 to 9.24) | 136 more per 1,000 (from 109 more to 167 more) |  MODERATE | CRITICAL |
|----|-----------------------|-------------|----------------------|-------------|-------------|-------------------------|----------------------|---------------------|------------------------|------------------------------------------------|------------------------------------------------------------------------------------------------|----------|

Malnutrition

|   |                       |             |                      |             |             |                                                                     |                 |                  |                        |                                               |                                                                                                |          |
|---|-----------------------|-------------|----------------------|-------------|-------------|---------------------------------------------------------------------|-----------------|------------------|------------------------|-----------------------------------------------|------------------------------------------------------------------------------------------------|----------|
| 9 | observational studies | not serious | serious <sup>a</sup> | not serious | not serious | publication bias strongly suspected strong association <sup>c</sup> | 218/952 (22.9%) | 349/2842 (12.3%) | OR 3.49 (1.82 to 6.69) | 205 more per 1,000 (from 80 more to 361 more) |  VERY LOW | CRITICAL |
|---|-----------------------|-------------|----------------------|-------------|-------------|---------------------------------------------------------------------|-----------------|------------------|------------------------|-----------------------------------------------|------------------------------------------------------------------------------------------------|----------|

Aspiration

|   |                       |             |             |             |             |                                                                     |                 |                |                         |                                              |                                                                                           |          |
|---|-----------------------|-------------|-------------|-------------|-------------|---------------------------------------------------------------------|-----------------|----------------|-------------------------|----------------------------------------------|-------------------------------------------------------------------------------------------|----------|
| 1 | observational studies | not serious | not serious | not serious | not serious | publication bias strongly suspected strong association <sup>b</sup> | 217/2457 (8.8%) | 26/2687 (1.0%) | OR 9.91 (6.58 to 14.95) | 79 more per 1,000 (from 51 more to 118 more) |  LOW | CRITICAL |
|---|-----------------------|-------------|-------------|-------------|-------------|---------------------------------------------------------------------|-----------------|----------------|-------------------------|----------------------------------------------|-------------------------------------------------------------------------------------------|----------|

Length of stay - Hospital

| Certainty assessment |                       |              |                      |              |             |                                                  | № of patients |              | Effect            |                                             | Certainty                                                                                       | Importance |
|----------------------|-----------------------|--------------|----------------------|--------------|-------------|--------------------------------------------------|---------------|--------------|-------------------|---------------------------------------------|-------------------------------------------------------------------------------------------------|------------|
| № of studies         | Study design          | Risk of bias | Inconsistency        | Indirectness | Imprecision | Other considerations                             | Dysphagia     | No Dysphagia | Relative (95% CI) | Absolute (95% CI)                           |                                                                                                 |            |
| 16                   | observational studies | not serious  | serious <sup>a</sup> | not serious  | not serious | publication bias strongly suspected <sup>c</sup> | 141159        | 556455       | -                 | MD 4.72 higher (3.53 higher to 5.91 higher) | <br>VERY LOW | IMPORTANT  |

**Swallowing functions**

|   |                       |             |             |             |             |                                                                     |     |     |   |                                           |                                                                                            |           |
|---|-----------------------|-------------|-------------|-------------|-------------|---------------------------------------------------------------------|-----|-----|---|-------------------------------------------|--------------------------------------------------------------------------------------------|-----------|
| 2 | observational studies | not serious | not serious | not serious | not serious | publication bias strongly suspected strong association <sup>c</sup> | 102 | 200 | - | SMD 2.71 lower (3.04 lower to 2.38 lower) | <br>LOW | IMPORTANT |
|---|-----------------------|-------------|-------------|-------------|-------------|---------------------------------------------------------------------|-----|-----|---|-------------------------------------------|--------------------------------------------------------------------------------------------|-----------|

CI: Confidence interval; OR: Odds ratio; MD: Mean difference

## Explanations

- a. I<sup>2</sup> ≥ 75%
- b. Wide confidence intervals
- c. ≤ 8 studies for this outcome



## Summary of findings:

**Dysphagia compared to No Dysphagia for Stroke**

Patient or population: Stroke

Setting:

Intervention: Dysphagia

Comparison: No Dysphagia

| Outcomes                     | Anticipated absolute effects*<br>(95% CI)      |                                                            | Relative effect<br>(95% CI)       | No of<br>participants<br>(studies)         | Certainty of the<br>evidence<br>(GRADE) | Comments |
|------------------------------|------------------------------------------------|------------------------------------------------------------|-----------------------------------|--------------------------------------------|-----------------------------------------|----------|
|                              | Risk with No<br>Dysphagia                      | Risk with<br>Dysphagia                                     |                                   |                                            |                                         |          |
| Overall Mortality            | 17 per 1,000                                   | <b>121 per 1,000</b><br>(77 to 185)                        | <b>OR 7.73</b><br>(4.68 to 12.76) | 701468<br>(22<br>observational<br>studies) | ⊕⊕⊕○<br>MODERATE <sup>a</sup>           |          |
| mRS 0-1                      | 302 per 1,000                                  | <b>80 per 1,000</b><br>(45 to 132)                         | <b>OR 0.20</b><br>(0.11 to 0.35)  | 5582<br>(2 observational<br>studies)       | ⊕⊕○○<br>LOW <sup>a,b</sup>              |          |
| Pneumonia                    | 25 per 1,000                                   | <b>161 per 1,000</b><br>(134 to 192)                       | <b>OR 7.45</b><br>(6.01 to 9.24)  | 767179<br>(33<br>observational<br>studies) | ⊕⊕⊕○<br>MODERATE <sup>a</sup>           |          |
| Malnutrition                 | 123 per 1,000                                  | <b>328 per 1,000</b><br>(203 to 484)                       | <b>OR 3.49</b><br>(1.82 to 6.69)  | 3794<br>(9 observational<br>studies)       | ⊕○○○<br>VERY LOW <sup>a,c</sup>         |          |
| Aspiration                   | 10 per 1,000                                   | <b>88 per 1,000</b><br>(60 to 127)                         | <b>OR 9.91</b><br>(6.58 to 14.95) | 5144<br>(1 observational<br>study)         | ⊕⊕○○<br>LOW <sup>b</sup>                |          |
| Length of stay -<br>Hospital | The mean<br>length of stay -<br>Hospital was 0 | <b>MD 4.72 higher</b><br>(3.53 higher to<br>5.91 higher)   | -                                 | 697614<br>(16<br>observational<br>studies) | ⊕○○○<br>VERY LOW <sup>a,c</sup>         |          |
| Swallowing<br>functions      | -                                              | <b>SMD 2.71<br/>lower</b><br>(3.04 lower to<br>2.38 lower) | -                                 | 302<br>(2 observational<br>studies)        | ⊕⊕○○<br>LOW <sup>c</sup>                |          |

\*The risk in the intervention group (and its 95% confidence interval) is based on the assumed risk in the comparison group and the relative effect of the intervention (and its 95% CI).

CI: Confidence interval; OR: Odds ratio; MD: Mean difference; SMD: Standardised mean difference

**GRADE Working Group grades of evidence**

**High certainty:** We are very confident that the true effect lies close to that of the estimate of the effect

**Moderate certainty:** We are moderately confident in the effect estimate: The true effect is likely to be close to the estimate of the effect, but there is a possibility that it is substantially different

**Low certainty:** Our confidence in the effect estimate is limited: The true effect may be substantially different from the estimate of the effect

**Very low certainty:** We have very little confidence in the effect estimate: The true effect is likely to be substantially different from the estimate of effect

**Explanations**

a. I<sup>2</sup> ≥ 75%

b. ≤ 2 studies to report this outcome

c. Publication bias suspected

## Screening

### Screening compared to No screening

| Certainty assessment                     |                       |              |                      |              |                      |                                                  | № of patients       |                     | Effect                           |                                                          | Certainty                                                                                         | Importance    |
|------------------------------------------|-----------------------|--------------|----------------------|--------------|----------------------|--------------------------------------------------|---------------------|---------------------|----------------------------------|----------------------------------------------------------|---------------------------------------------------------------------------------------------------|---------------|
| № of studies                             | Study design          | Risk of bias | Inconsistency        | Indirectness | Imprecision          | Other considerations                             | Screening           | No screening        | Relative (95% CI)                | Absolute (95% CI)                                        |                                                                                                   |               |
| <b>Mortality</b>                         |                       |              |                      |              |                      |                                                  |                     |                     |                                  |                                                          |                                                                                                   |               |
| 8                                        | observational studies | not serious  | serious <sup>a</sup> | not serious  | serious <sup>b</sup> | publication bias strongly suspected <sup>c</sup> | 6192/70974 (8.7%)   | 3217/15994 (20.1%)  | <b>OR 0.59</b><br>(0.25 to 1.38) | <b>72 fewer per 1,000</b><br>(from 142 fewer to 57 more) | <br>VERY LOW   | CRITICAL      |
| <b>Pneumonia</b>                         |                       |              |                      |              |                      |                                                  |                     |                     |                                  |                                                          |                                                                                                   |               |
| 12                                       | observational studies | not serious  | serious <sup>a</sup> | not serious  | not serious          | none                                             | 25413/357102 (7.1%) | 17537/179548 (9.8%) | <b>OR 0.55</b><br>(0.36 to 0.83) | <b>41 fewer per 1,000</b><br>(from 60 fewer to 15 fewer) | <br>VERY LOW   | CRITICAL      |
| <b>Length of stay in hospital</b>        |                       |              |                      |              |                      |                                                  |                     |                     |                                  |                                                          |                                                                                                   |               |
| 5                                        | observational studies | not serious  | serious <sup>a</sup> | not serious  | serious <sup>b</sup> | publication bias strongly suspected <sup>c</sup> | 14512               | 6493                | -                                | <b>MD 0.02 higher</b><br>(2.22 lower to 2.26 higher)     | <br>VERY LOW | IMPORTANT     |
| <b>Tube - Nasogastric tube insertion</b> |                       |              |                      |              |                      |                                                  |                     |                     |                                  |                                                          |                                                                                                   |               |
| 3                                        | observational studies | not serious  | not serious          | not serious  | serious <sup>b</sup> | publication bias strongly suspected <sup>c</sup> | 117/265 (44.2%)     | 102/194 (52.6%)     | <b>OR 0.86</b><br>(0.51 to 1.45) | <b>38 fewer per 1,000</b><br>(from 165 fewer to 91 more) | <br>VERY LOW | NOT IMPORTANT |

CI: Confidence interval; OR: Odds ratio; MD: Mean difference

## Explanations

- a. I<sup>2</sup> ≥ 75%
- b. Wide confidence intervals
- c. ≤ 8 studies for this outcome

## Summary of findings:

---

**Screening compared to No screening for Dysphagia after stroke**


---

**Patient or population:** Dysphagia after stroke

**Setting:**
**Intervention:** Screening

**Comparison:** No screening

| Outcomes                                | Anticipated absolute effects*<br>(95% CI)              |                                                         | Relative effect<br>(95% CI)      | № of participants<br>(studies)             | Certainty of the<br>evidence<br>(GRADE) | Comments |
|-----------------------------------------|--------------------------------------------------------|---------------------------------------------------------|----------------------------------|--------------------------------------------|-----------------------------------------|----------|
|                                         | Risk with No<br>screening                              | Risk with<br>Screening                                  |                                  |                                            |                                         |          |
| Mortality                               | 201 per 1,000                                          | <b>129 per 1,000</b><br>(59 to 258)                     | <b>OR 0.59</b><br>(0.25 to 1.38) | 86968<br>(8 observational<br>studies)      | ⊕○○○<br>VERY LOW <sup>a,b,c</sup>       |          |
| Pneumonia                               | 98 per 1,000                                           | <b>56 per 1,000</b><br>(38 to 82)                       | <b>OR 0.55</b><br>(0.36 to 0.83) | 536650<br>(12<br>observational<br>studies) | ⊕○○○<br>VERY LOW <sup>a</sup>           |          |
| Length of stay in<br>hospital           | The mean<br>length of stay in<br>hospital was <b>0</b> | <b>MD 0.02 higher</b><br>(2.22 lower to<br>2.26 higher) | -                                | 21005<br>(5 observational<br>studies)      | ⊕○○○<br>VERY LOW <sup>a,b,c</sup>       |          |
| Tube -<br>Nasogastric tube<br>insertion | 526 per 1,000                                          | <b>488 per 1,000</b><br>(361 to 617)                    | <b>OR 0.86</b><br>(0.51 to 1.45) | 459<br>(3 observational<br>studies)        | ⊕○○○<br>VERY LOW <sup>b,c</sup>         |          |

\*The risk in the intervention group (and its 95% confidence interval) is based on the assumed risk in the comparison group and the **relative effect** of the intervention (and its 95% CI).

CI: Confidence interval; OR: Odds ratio; MD: Mean difference

**GRADE Working Group grades of evidence**

**High certainty:** We are very confident that the true effect lies close to that of the estimate of the effect

**Moderate certainty:** We are moderately confident in the effect estimate: The true effect is likely to be close to the estimate of the effect, but there is a possibility that it is substantially different

**Low certainty:** Our confidence in the effect estimate is limited: The true effect may be substantially different from the estimate of the effect

**Very low certainty:** We have very little confidence in the effect estimate: The true effect is likely to be substantially different from the estimate of effect

---

**Explanations**

a. I2 ≥ 75%

b. Wide confidence intervals

c. ≤ 8 studies for this outcome

## Early Screening compared to Late Screening

| Certainty assessment                   |                       |              |                      |              |                      |                                                                     | № of patients       |                     | Effect                            |                                                            | Certainty                                                                                         | Importance    |
|----------------------------------------|-----------------------|--------------|----------------------|--------------|----------------------|---------------------------------------------------------------------|---------------------|---------------------|-----------------------------------|------------------------------------------------------------|---------------------------------------------------------------------------------------------------|---------------|
| № of studies                           | Study design          | Risk of bias | Inconsistency        | Indirectness | Imprecision          | Other considerations                                                | Early screening     | Late screening      | Relative (95% CI)                 | Absolute (95% CI)                                          |                                                                                                   |               |
| <b>Mortality</b>                       |                       |              |                      |              |                      |                                                                     |                     |                     |                                   |                                                            |                                                                                                   |               |
| 7                                      | observational studies | not serious  | serious <sup>a</sup> | not serious  | not serious          | publication bias strongly suspected <sup>b</sup>                    | 11606/80014 (14.5%) | 14961/64293 (23.3%) | <b>OR 0.62</b><br>(0.43 to 0.91)  | <b>74 fewer per 1,000</b><br>(from 117 fewer to 16 fewer)  | <br>VERY LOW   | CRITICAL      |
| <b>mRS - 4-5</b>                       |                       |              |                      |              |                      |                                                                     |                     |                     |                                   |                                                            |                                                                                                   |               |
| 1                                      | observational studies | not serious  | not serious          | not serious  | not serious          | publication bias strongly suspected <sup>b</sup>                    | 731/2647 (27.6%)    | 259/662 (39.1%)     | <b>OR 0.59</b><br>(0.50 to 0.71)  | <b>116 fewer per 1,000</b><br>(from 148 fewer to 78 fewer) | <br>VERY LOW   | CRITICAL      |
| <b>Pneumonia</b>                       |                       |              |                      |              |                      |                                                                     |                     |                     |                                   |                                                            |                                                                                                   |               |
| 10                                     | observational studies | not serious  | serious <sup>a</sup> | not serious  | not serious          | publication bias strongly suspected strong association <sup>c</sup> | 5863/61967 (9.5%)   | 5305/34400 (15.4%)  | <b>OR 0.45</b><br>(0.35 to 0.58)  | <b>78 fewer per 1,000</b><br>(from 94 fewer to 59 fewer)   | <br>VERY LOW  | CRITICAL      |
| <b>Length of stay in hospital</b>      |                       |              |                      |              |                      |                                                                     |                     |                     |                                   |                                                            |                                                                                                   |               |
| 6                                      | observational studies | not serious  | serious <sup>a</sup> | not serious  | not serious          | publication bias strongly suspected <sup>b</sup>                    | 24176               | 31909               | -                                 | <b>MD 2.27 lower</b><br>(3.12 lower to 1.43 lower)         | <br>VERY LOW | IMPORTANT     |
| <b>QOL</b>                             |                       |              |                      |              |                      |                                                                     |                     |                     |                                   |                                                            |                                                                                                   |               |
| 1                                      | observational studies | not serious  | not serious          | not serious  | serious <sup>d</sup> | publication bias strongly suspected <sup>b</sup>                    | 1/89 (1.1%)         | 0/49 (0.0%)         | <b>OR 1.68</b><br>(0.07 to 41.97) | <b>0 fewer per 1,000</b><br>(from 0 fewer to 0 fewer)      | <br>VERY LOW | IMPORTANT     |
| <b>Feeding tube - Nasogastric tube</b> |                       |              |                      |              |                      |                                                                     |                     |                     |                                   |                                                            |                                                                                                   |               |
| 2                                      | observational studies | not serious  | not serious          | not serious  | serious <sup>d</sup> | publication bias strongly suspected <sup>b</sup>                    | 22/58 (37.9%)       | 46/88 (52.3%)       | <b>OR 0.52</b><br>(0.26 to 1.04)  | <b>160 fewer per 1,000</b><br>(from 301 fewer to 10 more)  | <br>VERY LOW | NOT IMPORTANT |

CI: Confidence interval; OR: Odds ratio; MD: Mean difference

## Summary of findings:

## Early screening compared to Late screening for Dysphagia after stroke

Patient or population: Dysphagia after stroke

Setting:

Intervention: Early screening

Comparison: Late screening

| Outcomes                           | Anticipated absolute effects*<br>(95% CI)              |                                                       | Relative effect<br>(95% CI)       | № of<br>participants<br>(studies)         | Certainty of the<br>evidence<br>(GRADE) | Comments |
|------------------------------------|--------------------------------------------------------|-------------------------------------------------------|-----------------------------------|-------------------------------------------|-----------------------------------------|----------|
|                                    | Risk with Late<br>screening                            | Risk with Early<br>screening                          |                                   |                                           |                                         |          |
| Mortality                          | 233 per 1,000                                          | <b>158 per 1,000</b><br>(115 to 216)                  | <b>OR 0.62</b><br>(0.43 to 0.91)  | 144307<br>(7 observational<br>studies)    | ⊕○○○<br>VERY LOW <sup>a,b</sup>         |          |
| mRS - 4-5                          | 391 per 1,000                                          | <b>275 per 1,000</b><br>(243 to 313)                  | <b>OR 0.59</b><br>(0.50 to 0.71)  | 3309<br>(1 observational<br>study)        | ⊕○○○<br>VERY LOW <sup>b</sup>           |          |
| Pneumonia                          | 154 per 1,000                                          | <b>76 per 1,000</b><br>(60 to 96)                     | <b>OR 0.45</b><br>(0.35 to 0.58)  | 96367<br>(10<br>observational<br>studies) | ⊕○○○<br>VERY LOW <sup>a,c</sup>         |          |
| Length of stay in<br>hospital      | The mean<br>length of stay in<br>hospital was <b>0</b> | <b>MD 2.27 lower</b><br>(3.12 lower to<br>1.43 lower) | -                                 | 56085<br>(6 observational<br>studies)     | ⊕○○○<br>VERY LOW <sup>a,b</sup>         |          |
| QOL                                | 0 per 1,000                                            | <b>0 per 1,000</b><br>(0 to 0)                        | <b>OR 1.68</b><br>(0.07 to 41.97) | 138<br>(1 observational<br>study)         | ⊕○○○<br>VERY LOW <sup>b,d</sup>         |          |
| Feeding tube -<br>Nasogastric tube | 523 per 1,000                                          | <b>363 per 1,000</b><br>(222 to 533)                  | <b>OR 0.52</b><br>(0.26 to 1.04)  | 146<br>(2 observational<br>studies)       | ⊕○○○<br>VERY LOW <sup>b,d</sup>         |          |

\*The risk in the intervention group (and its 95% confidence interval) is based on the assumed risk in the comparison group and the relative effect of the intervention (and its 95% CI).

CI: Confidence interval; OR: Odds ratio; MD: Mean difference

## GRADE Working Group grades of evidence

**High certainty:** We are very confident that the true effect lies close to that of the estimate of the effect

**Moderate certainty:** We are moderately confident in the effect estimate: The true effect is likely to be close to the estimate of the effect, but there is a possibility that it is substantially different

**Low certainty:** Our confidence in the effect estimate is limited: The true effect may be substantially different from the estimate of the effect

**Very low certainty:** We have very little confidence in the effect estimate: The true effect is likely to be substantially different from the estimate of effect

## Explanations

a. I<sup>2</sup> ≥ 75%

b. ≤ 7 studies to report this outcome

c. Asymmetry of the Funnel plot

d. Wide confidence intervals

### 3. Assessment

#### Early compared to Late Assessment

| Certainty assessment         |                       |              |               |              |             |                                                  | Impact                                                                                                                                                                                                                                                                                                                                                                                                       | Certainty                                                                                       | Importance |
|------------------------------|-----------------------|--------------|---------------|--------------|-------------|--------------------------------------------------|--------------------------------------------------------------------------------------------------------------------------------------------------------------------------------------------------------------------------------------------------------------------------------------------------------------------------------------------------------------------------------------------------------------|-------------------------------------------------------------------------------------------------|------------|
| Nº of studies                | Study design          | Risk of bias | Inconsistency | Indirectness | Imprecision | Other considerations                             |                                                                                                                                                                                                                                                                                                                                                                                                              |                                                                                                 |            |
| <b>Pneumonia</b>             |                       |              |               |              |             |                                                  |                                                                                                                                                                                                                                                                                                                                                                                                              |                                                                                                 |            |
| 2                            | observational studies | not serious  | not serious   | not serious  | not serious | publication bias strongly suspected <sup>a</sup> | Bray 2017: 24,542 patients<br><ul style="list-style-type: none"> <li>~60% less with Early compared to Late assessment</li> <li>OR: 0.60 (0.40-0.78) at &lt; 6 hr vs 6-24 hr, p &lt; 0.001</li> <li>OR: 0.40 (0.16-0.59) at &lt; 6 hr vs 24-48 hr, p &lt; 0.001</li> </ul> Dhufaigh 2017: 135 patients<br><ul style="list-style-type: none"> <li>12.8 vs 26.5%, OR: 0.41 (0.17, 0.99), p &lt; 0.05</li> </ul> | <br>VERY LOW | CRITICAL   |
| <b>Dysphagia improvement</b> |                       |              |               |              |             |                                                  |                                                                                                                                                                                                                                                                                                                                                                                                              |                                                                                                 |            |
| 1                            | observational studies | not serious  | not serious   | not serious  | not serious | publication bias strongly suspected <sup>a</sup> | 1.5 vs 0.6 in Early vs Late assessment                                                                                                                                                                                                                                                                                                                                                                       | <br>VERY LOW | IMPORTANT  |

CI: Confidence interval

#### Explanations

a. Two or less studies for this outcome

## Clinical Assessment compared to Instrumental Assessment

| № of studies     | Study design          | Certainty assessment |               |              |                      |                                                                     | № of patients    |               | Effect                 |                                               | Certainty                                                                                        | Importance |
|------------------|-----------------------|----------------------|---------------|--------------|----------------------|---------------------------------------------------------------------|------------------|---------------|------------------------|-----------------------------------------------|--------------------------------------------------------------------------------------------------|------------|
|                  |                       | Risk of bias         | Inconsistency | Indirectness | Imprecision          | Other considerations                                                | Clinical Bedside | Instrument    | Relative (95% CI)      | Absolute (95% CI)                             |                                                                                                  |            |
| <b>Mortality</b> |                       |                      |               |              |                      |                                                                     |                  |               |                        |                                               |                                                                                                  |            |
| 1                | observational studies | not serious          | not serious   | not serious  | serious <sup>a</sup> | publication bias strongly suspected <sup>b</sup>                    | 23/220 (10.5%)   | 16/220 (7.3%) | OR 1.49 (0.76 to 2.90) | 32 more per 1,000 (from 16 fewer to 113 more) | <br>VERY LOW  | CRITICAL   |
| <b>Pneumonia</b> |                       |                      |               |              |                      |                                                                     |                  |               |                        |                                               |                                                                                                  |            |
| 1                | observational studies | not serious          | not serious   | not serious  | not serious          | publication bias strongly suspected strong association <sup>b</sup> | 27/220 (12.3%)   | 14/220 (6.4%) | OR 2.06 (1.05 to 4.04) | 59 more per 1,000 (from 3 more to 152 more)   | <br>LOW       | CRITICAL   |
| <b>LOS</b>       |                       |                      |               |              |                      |                                                                     |                  |               |                        |                                               |                                                                                                  |            |
| 1                | observational studies | not serious          | not serious   | not serious  | not serious          | publication bias strongly suspected <sup>b</sup>                    | 220              | 220           | -                      | MD 6.33 lower (9.67 lower to 2.99 lower)      | <br>VERY LOW | IMPORTANT  |

CI: Confidence interval; OR: Odds ratio; MD: Mean difference

### Explanations

- a. Wide confidence intervals
- b. One study to report this outcome

## Summary of findings:

## Clinical Assessment compared to Instrumental Assessment

Patient or population: Stroke

Setting:

Intervention: Clinical Bedside

Comparison: Instrument

| Outcomes  | Anticipated absolute effects*<br>(95% CI) |                                                       | Relative effect<br>(95% CI)      | № of<br>participants<br>(studies) | Certainty of the<br>evidence<br>(GRADE) | Comments |
|-----------|-------------------------------------------|-------------------------------------------------------|----------------------------------|-----------------------------------|-----------------------------------------|----------|
|           | Risk with<br>Instrument                   | Risk with<br>Clinical<br>Bedside                      |                                  |                                   |                                         |          |
| Mortality | 73 per 1,000                              | <b>105 per 1,000</b><br>(56 to 185)                   | <b>OR 1.49</b><br>(0.76 to 2.90) | 440<br>(1 observational<br>study) | ⊕○○○<br>VERY LOW <sup>a,b</sup>         |          |
| Pneumonia | 64 per 1,000                              | <b>123 per 1,000</b><br>(67 to 215)                   | <b>OR 2.06</b><br>(1.05 to 4.04) | 440<br>(1 observational<br>study) | ⊕⊕○○<br>LOW <sup>b</sup>                |          |
| LOS       | The mean LOS<br>was <b>0</b>              | <b>MD 6.33 lower</b><br>(9.67 lower to<br>2.99 lower) | -                                | 440<br>(1 observational<br>study) | ⊕○○○<br>VERY LOW <sup>b</sup>           |          |

\*The risk in the intervention group (and its 95% confidence interval) is based on the assumed risk in the comparison group and the relative effect of the intervention (and its 95% CI).

CI: Confidence interval; OR: Odds ratio; MD: Mean difference

## GRADE Working Group grades of evidence

**High certainty:** We are very confident that the true effect lies close to that of the estimate of the effect

**Moderate certainty:** We are moderately confident in the effect estimate: The true effect is likely to be close to the estimate of the effect, but there is a possibility that it is substantially different

**Low certainty:** Our confidence in the effect estimate is limited: The true effect may be substantially different from the estimate of the effect

**Very low certainty:** We have very little confidence in the effect estimate: The true effect is likely to be substantially different from the estimate of effect

## Explanations

a. Wide confidence intervals

b. One study to report this outcome



## Instrumental assessment with FEES compared to VFSS

| № of studies               | Study design          | Certainty assessment |               |              |                      |                                                                     | № of patients                     |               | Effect                            |                                                             | Certainty                                                                                       | Importance    |
|----------------------------|-----------------------|----------------------|---------------|--------------|----------------------|---------------------------------------------------------------------|-----------------------------------|---------------|-----------------------------------|-------------------------------------------------------------|-------------------------------------------------------------------------------------------------|---------------|
|                            |                       | Risk of bias         | Inconsistency | Indirectness | Imprecision          | Other considerations                                                | instrumental assessment with VFSS | FEES          | Relative (95% CI)                 | Absolute (95% CI)                                           |                                                                                                 |               |
| <b>Pneumonia</b>           |                       |                      |               |              |                      |                                                                     |                                   |               |                                   |                                                             |                                                                                                 |               |
| 1                          | observational studies | not serious          | not serious   | not serious  | serious <sup>a</sup> | publication bias strongly suspected <sup>b</sup>                    | 7/24 (29.2%)                      | 1/21 (4.8%)   | <b>OR 8.24</b><br>(0.92 to 73.79) | <b>244 more per 1,000</b><br>(from 4 fewer to 739 more)     | <br>VERY LOW | CRITICAL      |
| <b>Complications - PEG</b> |                       |                      |               |              |                      |                                                                     |                                   |               |                                   |                                                             |                                                                                                 |               |
| 1                          | observational studies | not serious          | not serious   | not serious  | not serious          | publication bias strongly suspected strong association <sup>b</sup> | 2/78 (2.6%)                       | 17/61 (27.9%) | <b>OR 0.07</b><br>(0.02 to 0.31)  | <b>252 fewer per 1,000</b><br>(from 271 fewer to 172 fewer) | <br>LOW      | NOT IMPORTANT |

CI: Confidence interval; OR: Odds ratio

### Explanations

- a. Wide confidence intervals
- b. One study to support the outcome

## Summary of findings:

## Instrumental assessment with VFSS compared to FEES

Patient or population: Dysphagia after stroke

Setting:

Intervention: instrumental assessment with VFSS

Comparison: FEES

| Outcomes               | Anticipated absolute effects*<br>(95% CI) |                                                      | Relative effect<br>(95% CI)       | No of<br>participants<br>(studies) | Certainty of the<br>evidence<br>(GRADE) | Comments |
|------------------------|-------------------------------------------|------------------------------------------------------|-----------------------------------|------------------------------------|-----------------------------------------|----------|
|                        | Risk with<br>FEES                         | Risk with<br>instrumental<br>assessment<br>with VFSS |                                   |                                    |                                         |          |
| Pneumonia              | 48 per 1,000                              | <b>292 per 1,000</b><br>(44 to 787)                  | <b>OR 8.24</b><br>(0.92 to 73.79) | 45<br>(1 observational<br>study)   | ⊕○○○<br>VERY LOW <sup>a,b</sup>         |          |
| Complications -<br>PEG | 279 per 1,000                             | <b>26 per 1,000</b><br>(8 to 107)                    | <b>OR 0.07</b><br>(0.02 to 0.31)  | 139<br>(1 observational<br>study)  | ⊕⊕○○<br>LOW <sup>b</sup>                |          |

\*The risk in the intervention group (and its 95% confidence interval) is based on the assumed risk in the comparison group and the relative effect of the intervention (and its 95% CI).

CI: Confidence interval; OR: Odds ratio

## GRADE Working Group grades of evidence

**High certainty:** We are very confident that the true effect lies close to that of the estimate of the effect

**Moderate certainty:** We are moderately confident in the effect estimate: The true effect is likely to be close to the estimate of the effect, but there is a possibility that it is substantially different

**Low certainty:** Our confidence in the effect estimate is limited: The true effect may be substantially different from the estimate of the effect

**Very low certainty:** We have very little confidence in the effect estimate: The true effect is likely to be substantially different from the estimate of effect

## Explanations

a. Wide confidence intervals

b. One study to support the outcome

**Complementary assessments in addition to clinical standard assessment (i.e. spirometry, EMG) compared to standard clinical assessment**

| Certainty assessment |              |              |               |              |             |                      | № of patients                                                                              |                              | Effect            |                   | Certainty | Importance |
|----------------------|--------------|--------------|---------------|--------------|-------------|----------------------|--------------------------------------------------------------------------------------------|------------------------------|-------------------|-------------------|-----------|------------|
| № of studies         | Study design | Risk of bias | Inconsistency | Indirectness | Imprecision | Other considerations | complementary assessments to clinical standard clinical assessments (i.e. spirometry, EMG) | standard clinical assessment | Relative (95% CI) | Absolute (95% CI) |           |            |

**Mortality**

|   |                       |             |             |             |                      |                                                  |                |                |                                  |                                                          |                                                                                                 |  |
|---|-----------------------|-------------|-------------|-------------|----------------------|--------------------------------------------------|----------------|----------------|----------------------------------|----------------------------------------------------------|-------------------------------------------------------------------------------------------------|--|
| 1 | observational studies | not serious | not serious | not serious | serious <sup>a</sup> | publication bias strongly suspected <sup>b</sup> | 20/148 (13.5%) | 32/163 (19.6%) | <b>OR 0.64</b><br>(0.35 to 1.18) | <b>61 fewer per 1,000</b><br>(from 118 fewer to 27 more) | <br>VERY LOW |  |
|---|-----------------------|-------------|-------------|-------------|----------------------|--------------------------------------------------|----------------|----------------|----------------------------------|----------------------------------------------------------|-------------------------------------------------------------------------------------------------|--|

**Pneumonia**

|   |                       |             |             |             |                      |                                                  |                |                |                                  |                                                         |                                                                                                 |  |
|---|-----------------------|-------------|-------------|-------------|----------------------|--------------------------------------------------|----------------|----------------|----------------------------------|---------------------------------------------------------|-------------------------------------------------------------------------------------------------|--|
| 1 | observational studies | not serious | not serious | not serious | serious <sup>a</sup> | publication bias strongly suspected <sup>b</sup> | 38/148 (25.7%) | 35/163 (21.5%) | <b>OR 1.26</b><br>(0.75 to 2.14) | <b>42 more per 1,000</b><br>(from 45 fewer to 154 more) | <br>VERY LOW |  |
|---|-----------------------|-------------|-------------|-------------|----------------------|--------------------------------------------------|----------------|----------------|----------------------------------|---------------------------------------------------------|-------------------------------------------------------------------------------------------------|--|

**Length of stay**

|   |                       |             |             |             |                      |                                                  |     |     |   |                                                   |                                                                                                   |  |
|---|-----------------------|-------------|-------------|-------------|----------------------|--------------------------------------------------|-----|-----|---|---------------------------------------------------|---------------------------------------------------------------------------------------------------|--|
| 1 | observational studies | not serious | not serious | not serious | serious <sup>a</sup> | publication bias strongly suspected <sup>b</sup> | 148 | 163 | - | <b>MD 1 higher</b><br>(0.16 lower to 2.16 higher) | <br>VERY LOW |  |
|---|-----------------------|-------------|-------------|-------------|----------------------|--------------------------------------------------|-----|-----|---|---------------------------------------------------|---------------------------------------------------------------------------------------------------|--|

**FOIS**

|   |                       |             |             |             |                      |                                                  |     |     |   |                                                     |                                                                                                   |  |
|---|-----------------------|-------------|-------------|-------------|----------------------|--------------------------------------------------|-----|-----|---|-----------------------------------------------------|---------------------------------------------------------------------------------------------------|--|
| 1 | observational studies | not serious | not serious | not serious | serious <sup>a</sup> | publication bias strongly suspected <sup>b</sup> | 148 | 163 | - | <b>MD 0.2 higher</b><br>(0.08 lower to 0.48 higher) | <br>VERY LOW |  |
|---|-----------------------|-------------|-------------|-------------|----------------------|--------------------------------------------------|-----|-----|---|-----------------------------------------------------|---------------------------------------------------------------------------------------------------|--|

CI: Confidence interval; OR: Odds ratio; MD: Mean difference

**Explanations**

- a. Wide Confidence intervals
- b. Single study to report this outcome

## Summary of findings:

### Complementary assessments in addition to clinical standard assessment (i.e. spirometry, EMG) compared to standard clinical assessment for Dysphagia after stroke

**Patient or population:** Dysphagia after stroke

**Setting:**

**Intervention:** complementary assessments to clinical assessment standard clinical assessment (i.e. spirometry, EMG)

**Comparison:** standard clinical assessment

| Outcomes       | Anticipated absolute effects* (95% CI) |                                                                                                                | Relative effect (95% CI)         | No of participants (studies)   | Certainty of the evidence (GRADE) | Comments |
|----------------|----------------------------------------|----------------------------------------------------------------------------------------------------------------|----------------------------------|--------------------------------|-----------------------------------|----------|
|                | Risk with standard clinical assessment | Risk with complementary assessments to clinical assessment standard clinical assessment (i.e. spirometry, EMG) |                                  |                                |                                   |          |
| Mortality      | 196 per 1,000                          | <b>135 per 1,000</b><br>(79 to 224)                                                                            | <b>OR 0.64</b><br>(0.35 to 1.18) | 311<br>(1 observational study) | ⊕○○○<br>VERY LOW <sup>a,b</sup>   |          |
| Pneumonia      | 215 per 1,000                          | <b>256 per 1,000</b><br>(170 to 369)                                                                           | <b>OR 1.26</b><br>(0.75 to 2.14) | 311<br>(1 observational study) | ⊕○○○<br>VERY LOW <sup>a,b</sup>   |          |
| Length of stay | The mean length of stay was 0          | <b>MD 1 higher</b><br>(0.16 lower to 2.16 higher)                                                              | -                                | 311<br>(1 observational study) | ⊕○○○<br>VERY LOW <sup>a,b</sup>   |          |
| FOIS           | The mean FOIS was 0                    | <b>MD 0.2 higher</b><br>(0.08 lower to 0.48 higher)                                                            | -                                | 311<br>(1 observational study) | ⊕○○○<br>VERY LOW <sup>a,b</sup>   |          |

\*The risk in the intervention group (and its 95% confidence interval) is based on the assumed risk in the comparison group and the relative effect of the intervention (and its 95% CI).

CI: Confidence interval; OR: Odds ratio; MD: Mean difference

#### GRADE Working Group grades of evidence

**High certainty:** We are very confident that the true effect lies close to that of the estimate of the effect

**Moderate certainty:** We are moderately confident in the effect estimate: The true effect is likely to be close to the estimate of the effect, but there is a possibility that it is substantially different

**Low certainty:** Our confidence in the effect estimate is limited: The true effect may be substantially different from the estimate of the effect

**Very low certainty:** We have very little confidence in the effect estimate: The true effect is likely to be substantially different from the estimate of effect

## Explanations

a. Wide Confidence intervals

b. Single study to report this outcome

## 4. Treatment

### 4.1 Dietary Interventions

#### TEXTURE MODIFICATION

Author(s):

Question: Texture modification compared to Control in Dysphagia after stroke

Setting:

Bibliography:

| Certainty assessment              |                   |              |               |              |                      |                                                  | N <sup>o</sup> of patients |                | Effect                 |                                                   | Certainty        | Importance |
|-----------------------------------|-------------------|--------------|---------------|--------------|----------------------|--------------------------------------------------|----------------------------|----------------|------------------------|---------------------------------------------------|------------------|------------|
| N <sup>o</sup> of studies         | Study design      | Risk of bias | Inconsistency | Indirectness | Imprecision          | Other considerations                             | Texture modification       | Control        | Relative (95% CI)      | Absolute (95% CI)                                 |                  |            |
| <b>Mortality</b>                  |                   |              |               |              |                      |                                                  |                            |                |                        |                                                   |                  |            |
| 1                                 | randomised trials | not serious  | not serious   | not serious  | serious <sup>a</sup> | publication bias strongly suspected <sup>b</sup> | 37/204 (18.1%)             | 23/102 (22.5%) | RR 0.80 (0.51 to 1.28) | 45 fewer per 1,000 (from 110 fewer to 63 more)    | ⊕⊕○○<br>LOW      | CRITICAL   |
| <b>Rankin ≥3</b>                  |                   |              |               |              |                      |                                                  |                            |                |                        |                                                   |                  |            |
| 1                                 | randomised trials | not serious  | not serious   | not serious  | serious <sup>a</sup> | publication bias strongly suspected <sup>b</sup> | 103/204 (50.5%)            | 49/102 (48.0%) | RR 1.05 (0.82 to 1.34) | 24 more per 1,000 (from 86 fewer to 163 more)     | ⊕⊕○○<br>LOW      | CRITICAL   |
| <b>Pneumonia</b>                  |                   |              |               |              |                      |                                                  |                            |                |                        |                                                   |                  |            |
| 1                                 | randomised trials | not serious  | not serious   | not serious  | not serious          | publication bias strongly suspected <sup>b</sup> | 54/204 (26.5%)             | 48/102 (47.1%) | RR 0.56 (0.41 to 0.77) | 207 fewer per 1,000 (from 278 fewer to 108 fewer) | ⊕⊕⊕○<br>MODERATE | CRITICAL   |
| <b>Functional swallowing</b>      |                   |              |               |              |                      |                                                  |                            |                |                        |                                                   |                  |            |
| 1                                 | randomised trials | not serious  | not serious   | not serious  | not serious          | publication bias strongly suspected <sup>b</sup> | 93/204 (45.6%)             | 33/102 (32.4%) | RR 1.41 (1.03 to 1.94) | 133 more per 1,000 (from 10 more to 304 more)     | ⊕⊕⊕○<br>MODERATE | IMPORTANT  |
| <b>Length of stay in hospital</b> |                   |              |               |              |                      |                                                  |                            |                |                        |                                                   |                  |            |
| 1                                 | randomised trials | not serious  | not serious   | not serious  | serious <sup>a</sup> | publication bias strongly suspected <sup>b</sup> | 204                        | 102            | -                      | MD 2.25 lower (4.66 lower to 0.16 higher)         | ⊕⊕○○<br>LOW      | IMPORTANT  |

CI: Confidence interval; RR: Risk ratio; MD: Mean difference

#### Explanations

- a. Wide confidence intervals  
b. One study to report this outcome

### Summary of findings:

## Texture modification compared to Control in Dysphagia after stroke

**Patient or population:** Dysphagia after stroke

**Setting:**

**Intervention:** Texture modification

**Comparison:** Control

| Outcomes                      | Anticipated absolute effects*<br>(95% CI)       |                                                        | Relative effect<br>(95% CI)      | No of<br>participants<br>(studies) | Certainty of the<br>evidence<br>(GRADE) | Comments |
|-------------------------------|-------------------------------------------------|--------------------------------------------------------|----------------------------------|------------------------------------|-----------------------------------------|----------|
|                               | Risk with<br>Control                            | Risk with<br>Texture<br>modification                   |                                  |                                    |                                         |          |
| Mortality                     | 225 per 1,000                                   | <b>180 per 1,000</b><br>(115 to 289)                   | <b>RR 0.80</b><br>(0.51 to 1.28) | 306<br>(1 RCT)                     | ⊕⊕○○<br>LOW <sup>a,b</sup>              |          |
| Rankin ≥3                     | 480 per 1,000                                   | <b>504 per 1,000</b><br>(394 to 644)                   | <b>RR 1.05</b><br>(0.82 to 1.34) | 306<br>(1 RCT)                     | ⊕⊕○○<br>LOW <sup>a,b</sup>              |          |
| Pneumonia                     | 471 per 1,000                                   | <b>264 per 1,000</b><br>(193 to 362)                   | <b>RR 0.56</b><br>(0.41 to 0.77) | 306<br>(1 RCT)                     | ⊕⊕⊕○<br>MODERATE <sup>b</sup>           |          |
| Functional<br>swallowing      | 324 per 1,000                                   | <b>456 per 1,000</b><br>(333 to 628)                   | <b>RR 1.41</b><br>(1.03 to 1.94) | 306<br>(1 RCT)                     | ⊕⊕⊕○<br>MODERATE <sup>b</sup>           |          |
| Length of stay<br>in hospital | The mean<br>length of stay in<br>hospital was 0 | <b>MD 2.25 lower</b><br>(4.66 lower to<br>0.16 higher) | -                                | 306<br>(1 RCT)                     | ⊕⊕○○<br>LOW <sup>a,b</sup>              |          |

\*The risk in the intervention group (and its 95% confidence interval) is based on the assumed risk in the comparison group and the relative effect of the intervention (and its 95% CI).

CI: Confidence interval; RR: Risk ratio; MD: Mean difference

### GRADE Working Group grades of evidence

**High certainty:** We are very confident that the true effect lies close to that of the estimate of the effect

**Moderate certainty:** We are moderately confident in the effect estimate: The true effect is likely to be close to the estimate of the effect, but there is a possibility that it is substantially different

**Low certainty:** Our confidence in the effect estimate is limited: The true effect may be substantially different from the estimate of the effect

**Very low certainty:** We have very little confidence in the effect estimate: The true effect is likely to be substantially different from the estimate of effect

## Explanations

- a. Wide confidence intervals  
b. One study to report this outcome

## FLUID THICKENING

Author(s):

Question: Fluid thickening compared to Control in Dysphagia after stroke

Setting:

Bibliography:

| № of studies                 | Study design      | Risk of bias | Certainty assessment |              |                      |                                                  | № of patients    |               | Effect                        |                                                          | Certainty        | Importance |
|------------------------------|-------------------|--------------|----------------------|--------------|----------------------|--------------------------------------------------|------------------|---------------|-------------------------------|----------------------------------------------------------|------------------|------------|
|                              |                   |              | Inconsistency        | Indirectness | Imprecision          | Other considerations                             | Fluid thickening | Control       | Relative (95% CI)             | Absolute (95% CI)                                        |                  |            |
| <b>Pneumonia</b>             |                   |              |                      |              |                      |                                                  |                  |               |                               |                                                          |                  |            |
| 3                            | randomised trials | not serious  | not serious          | not serious  | serious <sup>a</sup> | publication bias strongly suspected <sup>b</sup> | 0/35 (0.0%)      | 13/65 (20.0%) | <b>RR 0.19</b> (0.03 to 1.40) | <b>162 fewer per 1,000</b> (from 194 fewer to 80 more)   | ⊕⊕○○<br>LOW      | CRITICAL   |
| <b>Dysphagia</b>             |                   |              |                      |              |                      |                                                  |                  |               |                               |                                                          |                  |            |
| 1                            | randomised trials | not serious  | not serious          | not serious  | not serious          | publication bias strongly suspected <sup>b</sup> | 6/18 (33.3%)     | 39/46 (84.8%) | <b>RR 0.40</b> (0.20 to 0.77) | <b>509 fewer per 1,000</b> (from 678 fewer to 195 fewer) | ⊕⊕⊕○<br>MODERATE | IMPORTANT  |
| <b>LOS in Hospital, days</b> |                   |              |                      |              |                      |                                                  |                  |               |                               |                                                          |                  |            |
| 1                            | randomised trials | not serious  | not serious          | not serious  | not serious          | publication bias strongly suspected <sup>b</sup> | 18               | 46            | -                             | <b>MD 9.58 lower</b> (15.41 lower to 3.76 lower)         | ⊕⊕⊕○<br>MODERATE | IMPORTANT  |
| <b>Tests - Albumin</b>       |                   |              |                      |              |                      |                                                  |                  |               |                               |                                                          |                  |            |
| 1                            | randomised trials | not serious  | not serious          | not serious  | serious <sup>a</sup> | publication bias strongly suspected <sup>b</sup> | 18               | 46            | -                             | <b>MD 0.3 higher</b> (3.94 lower to 4.55 higher)         | ⊕⊕○○<br>LOW      | IMPORTANT  |

CI: Confidence interval; RR: Risk ratio; MD: Mean difference

## Explanations

a. Wide confidence intervals

b. ≤ 3 studies to report this outcome

## Summary of findings:

## Fluid thickening compared to Control in Dysphagia after stroke

Patient or population: Dysphagia after stroke

Setting:

Intervention: Fluid thickening

Comparison: Control

| Outcomes                 | Anticipated absolute effects*<br>(95% CI)         |                                                        | Relative effect<br>(95% CI)      | № of<br>participants<br>(studies) | Certainty of the<br>evidence<br>(GRADE) | Comments |
|--------------------------|---------------------------------------------------|--------------------------------------------------------|----------------------------------|-----------------------------------|-----------------------------------------|----------|
|                          | Risk with<br>Control                              | Risk with Fluid<br>thickening                          |                                  |                                   |                                         |          |
| Pneumonia                | 200 per 1,000                                     | <b>38 per 1,000</b><br>(6 to 280)                      | <b>RR 0.19</b><br>(0.03 to 1.40) | 100<br>(3 RCTs)                   | ⊕⊕○○<br>LOW <sup>a,b</sup>              |          |
| Dysphagia                | 848 per 1,000                                     | <b>339 per 1,000</b><br>(170 to 653)                   | <b>RR 0.40</b><br>(0.20 to 0.77) | 64<br>(1 RCT)                     | ⊕⊕⊕○<br>MODERATE <sup>b</sup>           |          |
| LOS in<br>Hospital, days | The mean LOS<br>in Hospital,<br>days was <b>0</b> | <b>MD 9.58 lower</b><br>(15.41 lower to<br>3.76 lower) | -                                | 64<br>(1 RCT)                     | ⊕⊕⊕○<br>MODERATE <sup>b</sup>           |          |
| Tests - Albumin          | The mean tests<br>- Albumin was <b>0</b>          | <b>MD 0.3 higher</b><br>(3.94 lower to<br>4.55 higher) | -                                | 64<br>(1 RCT)                     | ⊕⊕○○<br>LOW <sup>a,b</sup>              |          |

\*The risk in the intervention group (and its 95% confidence interval) is based on the assumed risk in the comparison group and the relative effect of the intervention (and its 95% CI).

CI: Confidence interval; RR: Risk ratio; MD: Mean difference

## GRADE Working Group grades of evidence

**High certainty:** We are very confident that the true effect lies close to that of the estimate of the effect

**Moderate certainty:** We are moderately confident in the effect estimate: The true effect is likely to be close to the estimate of the effect, but there is a possibility that it is substantially different

**Low certainty:** Our confidence in the effect estimate is limited: The true effect may be substantially different from the estimate of the effect

**Very low certainty:** We have very little confidence in the effect estimate: The true effect is likely to be substantially different from the estimate of effect

## Explanations

a. Wide confidence intervals

b. ≤ 3 studies to report this outcome



## 4.2 Behavioural Interventions

Author(s):

Question: Behavioural compared to Control in Dysphagia after stroke

Setting:

Bibliography:

| Certainty assessment          |                   |              |                      |              |                      |                                                  | Nº of patients  |                | Effect                 |                                                  | Certainty                                                                                         | Importance |
|-------------------------------|-------------------|--------------|----------------------|--------------|----------------------|--------------------------------------------------|-----------------|----------------|------------------------|--------------------------------------------------|---------------------------------------------------------------------------------------------------|------------|
| Nº of studies                 | Study design      | Risk of bias | Inconsistency        | Indirectness | Imprecision          | Other considerations                             | Behavioural     | Control        | Relative (95% CI)      | Absolute (95% CI)                                |                                                                                                   |            |
| <b>Mortality</b>              |                   |              |                      |              |                      |                                                  |                 |                |                        |                                                  |                                                                                                   |            |
| 3                             | randomised trials | not serious  | serious <sup>a</sup> | not serious  | serious <sup>b</sup> | publication bias strongly suspected <sup>c</sup> | 41/271 (15.1%)  | 25/234 (10.7%) | RR 1.47 (0.32 to 6.78) | 50 more per 1,000 (from 73 fewer to 618 more)    | <br>VERY LOW   | CRITICAL   |
| <b>mRS, ≥3</b>                |                   |              |                      |              |                      |                                                  |                 |                |                        |                                                  |                                                                                                   |            |
| 1                             | randomised trials | not serious  | not serious          | not serious  | serious <sup>b</sup> | publication bias strongly suspected <sup>c</sup> | 103/204 (50.5%) | 49/102 (48.0%) | RR 1.05 (0.82 to 1.34) | 24 more per 1,000 (from 86 fewer to 163 more)    | <br>LOW        | CRITICAL   |
| <b>Pneumonia</b>              |                   |              |                      |              |                      |                                                  |                 |                |                        |                                                  |                                                                                                   |            |
| 6                             | randomised trials | not serious  | not serious          | not serious  | not serious          | publication bias strongly suspected <sup>c</sup> | 69/375 (18.4%)  | 74/302 (24.5%) | RR 0.57 (0.43 to 0.75) | 105 fewer per 1,000 (from 140 fewer to 61 fewer) | <br>MODERATE  | CRITICAL   |
| <b>Dysphagia, improvement</b> |                   |              |                      |              |                      |                                                  |                 |                |                        |                                                  |                                                                                                   |            |
| 16                            | randomised trials | not serious  | serious <sup>a</sup> | not serious  | not serious          | none                                             | 235             | 205            | -                      | MD 1.09 higher (0.7 higher to 1.47 higher)       | <br>MODERATE | IMPORTANT  |
| <b>Length of stay</b>         |                   |              |                      |              |                      |                                                  |                 |                |                        |                                                  |                                                                                                   |            |
| 1                             | randomised trials | not serious  | not serious          | not serious  | serious <sup>b</sup> | publication bias strongly suspected <sup>c</sup> | 204             | 102            | -                      | MD 2.2 lower (4.61 lower to 0.21 higher)         | <br>LOW      | IMPORTANT  |
| <b>QOL, Change</b>            |                   |              |                      |              |                      |                                                  |                 |                |                        |                                                  |                                                                                                   |            |
| 1                             | randomised trials | not serious  | not serious          | not serious  | serious <sup>b</sup> | publication bias strongly suspected <sup>c</sup> | 8               | 8              | -                      | SMD 0.58 higher (0.43 lower to 1.58 higher)      | <br>LOW      | IMPORTANT  |

CI: Confidence interval; RR: Risk ratio; MD: Mean difference; SMD: Standardised mean difference

## Explanations

- a.  $I^2 \geq 65\%$
- b. Wide confidence intervals
- c.  $\leq 7$  studies to report this outcome

## Summary of findings:

## Behavioural compared to Control in Dysphagia after stroke

Patient or population: Dysphagia after stroke

Setting:

Intervention: Behavioural

Comparison: Control

| Outcomes                  | Anticipated absolute effects*<br>(95% CI)             |                                                              | Relative effect<br>(95% CI)      | No of<br>participants<br>(studies) | Certainty of the<br>evidence<br>(GRADE) | Comments |
|---------------------------|-------------------------------------------------------|--------------------------------------------------------------|----------------------------------|------------------------------------|-----------------------------------------|----------|
|                           | Risk with<br>Control                                  | Risk with<br>Behavioural                                     |                                  |                                    |                                         |          |
| Mortality                 | 107 per 1,000                                         | <b>157 per 1,000</b><br>(34 to 724)                          | <b>RR 1.47</b><br>(0.32 to 6.78) | 505<br>(3 RCTs)                    | ⊕○○○<br>VERY LOW <sup>a,b,c</sup>       |          |
| mRS, ≥3                   | 480 per 1,000                                         | <b>504 per 1,000</b><br>(394 to 644)                         | <b>RR 1.05</b><br>(0.82 to 1.34) | 306<br>(1 RCT)                     | ⊕⊕○○<br>LOW <sup>b,c</sup>              |          |
| Pneumonia                 | 245 per 1,000                                         | <b>140 per 1,000</b><br>(105 to 184)                         | <b>RR 0.57</b><br>(0.43 to 0.75) | 677<br>(6 RCTs)                    | ⊕⊕⊕○<br>MODERATE <sup>c</sup>           |          |
| Dysphagia,<br>improvement | The mean<br>dysphagia,<br>improvement<br>was <b>0</b> | <b>MD 1.09 higher</b><br>(0.7 higher to<br>1.47 higher)      | -                                | 440<br>(16 RCTs)                   | ⊕⊕⊕○<br>MODERATE <sup>a</sup>           |          |
| Length of stay            | The mean<br>length of stay<br>was <b>0</b>            | <b>MD 2.2 lower</b><br>(4.61 lower to<br>0.21 higher)        | -                                | 306<br>(1 RCT)                     | ⊕⊕○○<br>LOW <sup>b,c</sup>              |          |
| QOL, Change               | -                                                     | <b>SMD 0.58<br/>higher</b><br>(0.43 lower to<br>1.58 higher) | -                                | 16<br>(1 RCT)                      | ⊕⊕○○<br>LOW <sup>b,c</sup>              |          |

\*The risk in the intervention group (and its 95% confidence interval) is based on the assumed risk in the comparison group and the **relative effect** of the intervention (and its 95% CI).

CI: Confidence interval; RR: Risk ratio; MD: Mean difference; SMD: Standardised mean difference

## GRADE Working Group grades of evidence

**High certainty:** We are very confident that the true effect lies close to that of the estimate of the effect

**Moderate certainty:** We are moderately confident in the effect estimate: The true effect is likely to be close to the estimate of the effect, but there is a possibility that it is substantially different

**Low certainty:** Our confidence in the effect estimate is limited: The true effect may be substantially different from the estimate of the effect

**Very low certainty:** We have very little confidence in the effect estimate: The true effect is likely to be substantially different from the estimate of effect

## Explanations

a. I<sup>2</sup> ≥ 65%

b. Wide confidence intervals

c. ≤ 7 studies to report this outcome

## ACUPUNCTURE

Author(s):

Question: Acupuncture compared to Control in Dysphagia after stroke

Setting:

Bibliography:

| Certainty assessment              |                   |                      |                      |              |                      |                                                  | № of patients    |                  | Effect                 |                                                   | Certainty                                                                                         | Importance    |
|-----------------------------------|-------------------|----------------------|----------------------|--------------|----------------------|--------------------------------------------------|------------------|------------------|------------------------|---------------------------------------------------|---------------------------------------------------------------------------------------------------|---------------|
| № of studies                      | Study design      | Risk of bias         | Inconsistency        | Indirectness | Imprecision          | Other considerations                             | Acupuncture      | Control          | Relative (95% CI)      | Absolute (95% CI)                                 |                                                                                                   |               |
| <b>Pneumonia</b>                  |                   |                      |                      |              |                      |                                                  |                  |                  |                        |                                                   |                                                                                                   |               |
| 1                                 | randomised trials | serious <sup>a</sup> | serious <sup>b</sup> | not serious  | serious <sup>c</sup> | publication bias strongly suspected <sup>d</sup> | 2/60 (3.3%)      | 5/60 (8.3%)      | RR 0.40 (0.08 to 1.98) | 50 fewer per 1,000 (from 77 fewer to 82 more)     | <br>VERY LOW   | CRITICAL      |
| <b>Dyphagia at end</b>            |                   |                      |                      |              |                      |                                                  |                  |                  |                        |                                                   |                                                                                                   |               |
| 23                                | randomised trials | serious <sup>a</sup> | not serious          | not serious  | not serious          | none                                             | 234/1169 (20.0%) | 399/1008 (39.6%) | RR 0.51 (0.41 to 0.63) | 194 fewer per 1,000 (from 234 fewer to 146 fewer) | <br>MODERATE   | IMPORTANT     |
| <b>Quality of life</b>            |                   |                      |                      |              |                      |                                                  |                  |                  |                        |                                                   |                                                                                                   |               |
| 1                                 | randomised trials | not serious          | not serious          | not serious  | not serious          | publication bias strongly suspected <sup>d</sup> | 60               | 60               | -                      | MD 32 higher (24.99 higher to 39.01 higher)       | <br>MODERATE | IMPORTANT     |
| <b>Nasal feeding tube removal</b> |                   |                      |                      |              |                      |                                                  |                  |                  |                        |                                                   |                                                                                                   |               |
| 1                                 | randomised trials | serious <sup>a</sup> | not serious          | not serious  | not serious          | publication bias strongly suspected <sup>d</sup> | 34/38 (89.5%)    | 18/36 (50.0%)    | RR 1.79 (1.27 to 2.53) | 395 more per 1,000 (from 135 more to 765 more)    | <br>LOW      | NOT IMPORTANT |

CI: Confidence interval; RR: Risk ratio; MD: Mean difference

## Explanations

a. Not assessed due to lack of information

b. I<sup>2</sup> = 69%

c. Wide confidence intervals

d. 1 study to report this outcome

## Summary of findings:

## Acupuncture compared to Control in Dysphagia after stroke

Patient or population: Dysphagia after stroke

Setting:

Intervention: Acupuncture

Comparison: Control

| Outcomes                      | Anticipated absolute effects*<br>(95% CI)   |                                                          | Relative effect<br>(95% CI)      | No of<br>participants<br>(studies) | Certainty of the<br>evidence<br>(GRADE) | Comments |
|-------------------------------|---------------------------------------------|----------------------------------------------------------|----------------------------------|------------------------------------|-----------------------------------------|----------|
|                               | Risk with<br>Control                        | Risk with<br>Acupuncture                                 |                                  |                                    |                                         |          |
| Pneumonia                     | 83 per 1,000                                | <b>33 per 1,000</b><br>(7 to 165)                        | <b>RR 0.40</b><br>(0.08 to 1.98) | 120<br>(1 RCT)                     | ⊕○○○<br>VERY LOW <sup>a,b,c,d</sup>     |          |
| Dyaphagia at end              | 408 per 1,000                               | <b>208 per 1,000</b><br>(184 to 237)                     | <b>RR 0.51</b><br>(0.45 to 0.58) | 1993<br>(21 RCTs)                  | ⊕⊕○○<br>LOW <sup>a,d</sup>              |          |
| Quality of life               | The mean<br>quality of life<br>was <b>0</b> | <b>MD 32 higher</b><br>(24.99 higher to<br>39.01 higher) | -                                | 120<br>(1 RCT)                     | ⊕⊕⊕○<br>MODERATE <sup>d</sup>           |          |
| Nasal feeding<br>tube removal | 500 per 1,000                               | <b>895 per 1,000</b><br>(635 to 1,000)                   | <b>RR 1.79</b><br>(1.27 to 2.53) | 74<br>(1 RCT)                      | ⊕⊕○○<br>LOW <sup>a,d</sup>              |          |

\*The risk in the intervention group (and its 95% confidence interval) is based on the assumed risk in the comparison group and the **relative effect** of the intervention (and its 95% CI).

CI: Confidence interval; RR: Risk ratio; MD: Mean difference

## GRADE Working Group grades of evidence

**High certainty:** We are very confident that the true effect lies close to that of the estimate of the effect

**Moderate certainty:** We are moderately confident in the effect estimate: The true effect is likely to be close to the estimate of the effect, but there is a possibility that it is substantially different

**Low certainty:** Our confidence in the effect estimate is limited: The true effect may be substantially different from the estimate of the effect

**Very low certainty:** We have very little confidence in the effect estimate: The true effect is likely to be substantially different from the estimate of effect

## Explanations

a. Not assessed due to lack of information

b. I<sup>2</sup> = 69%

c. Wide confidence intervals

d. 1 study to report this outcome

## 4.3 Nutritional Interventions

### EARLY VS LATE NUTRITION

Author(s):

Question: Early nutrition compared to Late nutrition in Dysphagia after stroke

Setting:

Bibliography:

| № of studies                      | Study design      | Risk of bias | Certainty assessment |              |                      |                                                  | № of patients    |                  | Effect                 |                                               | Certainty        | Importance |
|-----------------------------------|-------------------|--------------|----------------------|--------------|----------------------|--------------------------------------------------|------------------|------------------|------------------------|-----------------------------------------------|------------------|------------|
|                                   |                   |              | Inconsistency        | Indirectness | Imprecision          | Other considerations                             | Early nutrition  | Late nutrition   | Relative (95% CI)      | Absolute (95% CI)                             |                  |            |
| <b>Mortality</b>                  |                   |              |                      |              |                      |                                                  |                  |                  |                        |                                               |                  |            |
| 4                                 | randomised trials | not serious  | not serious          | not serious  | serious <sup>a</sup> | publication bias strongly suspected <sup>b</sup> | 255/2172 (11.7%) | 272/2165 (12.6%) | RR 0.88 (0.57 to 1.37) | 15 fewer per 1,000 (from 54 fewer to 46 more) | ⊕⊕○○<br>LOW      | CRITICAL   |
| <b>Pneumonia</b>                  |                   |              |                      |              |                      |                                                  |                  |                  |                        |                                               |                  |            |
| 1                                 | randomised trials | not serious  | not serious          | not serious  | serious <sup>a</sup> | publication bias strongly suspected <sup>b</sup> | 130/2016 (6.4%)  | 116/2007 (5.8%)  | RR 1.12 (0.88 to 1.42) | 7 more per 1,000 (from 7 fewer to 24 more)    | ⊕⊕○○<br>LOW      | CRITICAL   |
| <b>mRS 0, 1</b>                   |                   |              |                      |              |                      |                                                  |                  |                  |                        |                                               |                  |            |
| 1                                 | randomised trials | not serious  | not serious          | not serious  | serious <sup>a</sup> | publication bias strongly suspected <sup>b</sup> | 472/2016 (23.4%) | 472/2007 (23.5%) | RR 1.00 (0.89 to 1.11) | 0 fewer per 1,000 (from 26 fewer to 26 more)  | ⊕⊕○○<br>LOW      | CRITICAL   |
| <b>Length of stay in hospital</b> |                   |              |                      |              |                      |                                                  |                  |                  |                        |                                               |                  |            |
| 4                                 | randomised trials | not serious  | not serious          | not serious  | serious <sup>a</sup> | publication bias strongly suspected <sup>b</sup> | 2145             | 2144             | -                      | MD 0.93 higher (1.05 lower to 2.91 higher)    | ⊕⊕○○<br>LOW      | IMPORTANT  |
| <b>Weight</b>                     |                   |              |                      |              |                      |                                                  |                  |                  |                        |                                               |                  |            |
| 4                                 | randomised trials | not serious  | not serious          | not serious  | not serious          | publication bias strongly suspected <sup>b</sup> | 153              | 162              | -                      | MD 1.03 higher (0.17 higher to 1.89 higher)   | ⊕⊕⊕○<br>MODERATE | IMPORTANT  |

CI: Confidence interval; RR: Risk ratio; MD: Mean difference

## Explanations

a. Wide confidence intervals

b. ≤ 4 studies to report this outcome

## Summary of findings:

## Early nutrition compared to Late nutrition in Dysphagia after stroke

Patient or population: Dysphagia after stroke

Setting:

Intervention: Early nutrition

Comparison: Late nutrition

| Outcomes                      | Anticipated absolute effects*<br>(95% CI)       |                                                          | Relative effect<br>(95% CI)      | No of<br>participants<br>(studies) | Certainty of the<br>evidence<br>(GRADE) | Comments |
|-------------------------------|-------------------------------------------------|----------------------------------------------------------|----------------------------------|------------------------------------|-----------------------------------------|----------|
|                               | Risk with Late<br>nutrition                     | Risk with Early<br>nutrition                             |                                  |                                    |                                         |          |
| Mortality                     | 126 per 1,000                                   | <b>111 per 1,000</b><br>(72 to 172)                      | <b>RR 0.88</b><br>(0.57 to 1.37) | 4337<br>(4 RCTs)                   | ⊕⊕○○<br>LOW <sup>a,b</sup>              |          |
| Pneumonia                     | 58 per 1,000                                    | <b>65 per 1,000</b><br>(51 to 82)                        | <b>RR 1.12</b><br>(0.88 to 1.42) | 4023<br>(1 RCT)                    | ⊕⊕○○<br>LOW <sup>a,b</sup>              |          |
| mRS 0, 1                      | 235 per 1,000                                   | <b>235 per 1,000</b><br>(209 to 261)                     | <b>RR 1.00</b><br>(0.89 to 1.11) | 4023<br>(1 RCT)                    | ⊕⊕○○<br>LOW <sup>a,b</sup>              |          |
| Length of stay<br>in hospital | The mean<br>length of stay in<br>hospital was 0 | <b>MD 0.93 higher</b><br>(1.05 lower to<br>2.91 higher)  | -                                | 4289<br>(4 RCTs)                   | ⊕⊕○○<br>LOW <sup>a,b</sup>              |          |
| Weight                        | The mean<br>weight was 0                        | <b>MD 1.03 higher</b><br>(0.17 higher to<br>1.89 higher) | -                                | 315<br>(4 RCTs)                    | ⊕⊕⊕○<br>MODERATE <sup>b</sup>           |          |

\*The risk in the intervention group (and its 95% confidence interval) is based on the assumed risk in the comparison group and the **relative effect** of the intervention (and its 95% CI).

CI: Confidence interval; RR: Risk ratio; MD: Mean difference

## GRADE Working Group grades of evidence

**High certainty:** We are very confident that the true effect lies close to that of the estimate of the effect

**Moderate certainty:** We are moderately confident in the effect estimate: The true effect is likely to be close to the estimate of the effect, but there is a possibility that it is substantially different

**Low certainty:** Our confidence in the effect estimate is limited: The true effect may be substantially different from the estimate of the effect

**Very low certainty:** We have very little confidence in the effect estimate: The true effect is likely to be substantially different from the estimate of effect

## Explanations

a. Wide confidence intervals

b. ≤ 4 studies to report this outcome

## EARLY ENTERAL OR PARENTRAL NUTRITION VS RESTRICTIVE

Author(s):

Question: Early enteral or parenteral nutrition compared to Control for Dysphagia after stroke

Setting:

Bibliography:

| Certainty assessment              |                   |              |               |              |                      |                                                  | № of patients                         |                 | Effect                 |                                                  | Certainty        | Importance |
|-----------------------------------|-------------------|--------------|---------------|--------------|----------------------|--------------------------------------------------|---------------------------------------|-----------------|------------------------|--------------------------------------------------|------------------|------------|
| № of studies                      | Study design      | Risk of bias | Inconsistency | Indirectness | Imprecision          | Other considerations                             | Early enteral or parenteral nutrition | Control         | Relative (95% CI)      | Absolute (95% CI)                                |                  |            |
| <b>Mortality</b>                  |                   |              |               |              |                      |                                                  |                                       |                 |                        |                                                  |                  |            |
| 1                                 | randomised trials | not serious  | not serious   | not serious  | serious <sup>a</sup> | publication bias strongly suspected <sup>b</sup> | 182/429 (42.4%)                       | 207/430 (48.1%) | RR 0.88 (0.76 to 1.02) | 58 fewer per 1,000 (from 116 fewer to 10 more)   | ⊕⊕○○<br>LOW      | CRITICAL   |
| <b>Pneumonia</b>                  |                   |              |               |              |                      |                                                  |                                       |                 |                        |                                                  |                  |            |
| 2                                 | randomised trials | not serious  | not serious   | not serious  | serious <sup>a</sup> | publication bias strongly suspected <sup>a</sup> | 143/504 (28.4%)                       | 148/501 (29.5%) | RR 0.97 (0.80 to 1.17) | 9 fewer per 1,000 (from 59 fewer to 50 more)     | ⊕⊕○○<br>LOW      | CRITICAL   |
| <b>mRS 0, 1</b>                   |                   |              |               |              |                      |                                                  |                                       |                 |                        |                                                  |                  |            |
| 2                                 | randomised trials | not serious  | not serious   | not serious  | serious <sup>a</sup> | publication bias strongly suspected <sup>b</sup> | 28/495 (5.7%)                         | 34/486 (7.0%)   | RR 0.84 (0.36 to 1.94) | 11 fewer per 1,000 (from 45 fewer to 66 more)    | ⊕⊕○○<br>LOW      | CRITICAL   |
| <b>Malnutrition</b>               |                   |              |               |              |                      |                                                  |                                       |                 |                        |                                                  |                  |            |
| 1                                 | randomised trials | not serious  | not serious   | not serious  | not serious          | publication bias strongly suspected <sup>b</sup> | 19/70 (27.1%)                         | 28/58 (48.3%)   | RR 0.56 (0.35 to 0.90) | 212 fewer per 1,000 (from 314 fewer to 48 fewer) | ⊕⊕⊕○<br>MODERATE | CRITICAL   |
| <b>Length of stay in hospital</b> |                   |              |               |              |                      |                                                  |                                       |                 |                        |                                                  |                  |            |
| 1                                 | randomised trials | not serious  | not serious   | not serious  | serious <sup>a</sup> | publication bias strongly suspected <sup>b</sup> | 429                                   | 430             | -                      | MD 1 higher (6.24 lower to 8.24 higher)          | ⊕⊕○○<br>LOW      | IMPORTANT  |

CI: Confidence interval; RR: Risk ratio; MD: Mean difference

## Explanations

a. Wide confidence intervals

b. ≤ 2 studies to report this outcome



## Summary of findings:

## Early enteral or parenteral nutrition compared to Control for Dysphagia after stroke

**Patient or population:** Dysphagia after stroke

**Setting:**

**Intervention:** Early enteral or parenteral nutrition

**Comparison:** Control

| Outcomes                      | Anticipated absolute effects*<br>(95% CI)       |                                                          | Relative effect<br>(95% CI)      | No of<br>participants<br>(studies) | Certainty of the<br>evidence<br>(GRADE) | Comments |
|-------------------------------|-------------------------------------------------|----------------------------------------------------------|----------------------------------|------------------------------------|-----------------------------------------|----------|
|                               | Risk with<br>Control                            | Risk with Early<br>enteral or<br>parenteral<br>nutrition |                                  |                                    |                                         |          |
| Mortality                     | 481 per 1,000                                   | <b>424 per 1,000</b><br>(366 to 491)                     | <b>RR 0.88</b><br>(0.76 to 1.02) | 859<br>(1 RCT)                     | ⊕⊕○○<br>LOW <sup>a,b</sup>              |          |
| Pneumonia                     | 295 per 1,000                                   | <b>287 per 1,000</b><br>(236 to 346)                     | <b>RR 0.97</b><br>(0.80 to 1.17) | 1005<br>(2 RCTs)                   | ⊕⊕○○<br>LOW <sup>a</sup>                |          |
| mRS 0, 1                      | 70 per 1,000                                    | <b>59 per 1,000</b><br>(25 to 136)                       | <b>RR 0.84</b><br>(0.36 to 1.94) | 981<br>(2 RCTs)                    | ⊕⊕○○<br>LOW <sup>a,b</sup>              |          |
| Malnutrition                  | 483 per 1,000                                   | <b>270 per 1,000</b><br>(169 to 434)                     | <b>RR 0.56</b><br>(0.35 to 0.90) | 128<br>(1 RCT)                     | ⊕⊕⊕○<br>MODERATE <sup>b</sup>           |          |
| Length of stay in<br>hospital | The mean<br>length of stay in<br>hospital was 0 | <b>MD 1 higher</b><br>(6.24 lower to<br>8.24 higher)     | -                                | 859<br>(1 RCT)                     | ⊕⊕○○<br>LOW <sup>a,b</sup>              |          |

\*The risk in the intervention group (and its 95% confidence interval) is based on the assumed risk in the comparison group and the **relative effect** of the intervention (and its 95% CI).

CI: Confidence interval; RR: Risk ratio; MD: Mean difference

### GRADE Working Group grades of evidence

**High certainty:** We are very confident that the true effect lies close to that of the estimate of the effect

**Moderate certainty:** We are moderately confident in the effect estimate: The true effect is likely to be close to the estimate of the effect, but there is a possibility that it is substantially different

**Low certainty:** Our confidence in the effect estimate is limited: The true effect may be substantially different from the estimate of the effect

**Very low certainty:** We have very little confidence in the effect estimate: The true effect is likely to be substantially different from the estimate of effect

## Explanations

a. Wide confidence intervals

b. ≤ 2 studies to report this outcome

## 4.4 Oral Health Interventions

Author(s):

Question: Oral health compared to Control in Dysphagia after stroke

Setting:

Bibliography:

| Certainty assessment              |                       |              |                      |              |                      |                                                  | № of patients |                | Effect                 |                                                   | Certainty         | Importance    |
|-----------------------------------|-----------------------|--------------|----------------------|--------------|----------------------|--------------------------------------------------|---------------|----------------|------------------------|---------------------------------------------------|-------------------|---------------|
| № of studies                      | Study design          | Risk of bias | Inconsistency        | Indirectness | Imprecision          | Other considerations                             | Oral health   | Control        | Relative (95% CI)      | Absolute (95% CI)                                 |                   |               |
| <b>Mortality</b>                  |                       |              |                      |              |                      |                                                  |               |                |                        |                                                   |                   |               |
| 1                                 | randomised trials     | not serious  | not serious          | not serious  | serious <sup>a</sup> | publication bias strongly suspected <sup>b</sup> | 9/103 (8.7%)  | 14/100 (14.0%) | RR 0.62 (0.28 to 1.38) | 53 fewer per 1,000 (from 101 fewer to 53 more)    | ⊕⊕○○<br>LOW       | CRITICAL      |
| <b>Pneumonia</b>                  |                       |              |                      |              |                      |                                                  |               |                |                        |                                                   |                   |               |
| 4                                 | randomised trials     | not serious  | not serious          | not serious  | serious <sup>a</sup> | publication bias strongly suspected <sup>b</sup> | 1/159 (0.6%)  | 7/125 (5.6%)   | RR 0.14 (0.02 to 1.11) | 48 fewer per 1,000 (from 55 fewer to 6 more)      | ⊕⊕○○<br>LOW       | CRITICAL      |
| <b>OHA and Oral Index</b>         |                       |              |                      |              |                      |                                                  |               |                |                        |                                                   |                   |               |
| 4                                 | randomised trials     | not serious  | serious <sup>c</sup> | not serious  | serious <sup>a</sup> | publication bias strongly suspected <sup>b</sup> | 125           | 92             | -                      | SMD 1.13 SD lower (2.41 lower to 0.14 higher)     | ⊕○○○○<br>VERY LOW | IMPORTANT     |
| <b>FOIS</b>                       |                       |              |                      |              |                      |                                                  |               |                |                        |                                                   |                   |               |
| 1                                 | randomised trials     | not serious  | not serious          | not serious  | not serious          | publication bias strongly suspected <sup>b</sup> | 25            | 18             | -                      | MD 2.3 higher (1.7 higher to 2.9 higher)          | ⊕⊕⊕○<br>MODERATE  | IMPORTANT     |
| <b>Length of stay in hospital</b> |                       |              |                      |              |                      |                                                  |               |                |                        |                                                   |                   |               |
| 2                                 | observational studies | not serious  | not serious          | not serious  | not serious          | publication bias strongly suspected <sup>b</sup> | 109           | 91             | -                      | MD 3.21 lower (5.26 lower to 1.16 lower)          | ⊕○○○○<br>VERY LOW | IMPORTANT     |
| <b>Nasogastric tube</b>           |                       |              |                      |              |                      |                                                  |               |                |                        |                                                   |                   |               |
| 1                                 | randomised trials     | not serious  | not serious          | not serious  | not serious          | publication bias strongly suspected <sup>b</sup> | 12/29 (41.4%) | 22/22 (100.0%) | RR 0.43 (0.28 to 0.65) | 570 fewer per 1,000 (from 720 fewer to 350 fewer) | ⊕⊕⊕○<br>MODERATE  | NOT IMPORTANT |

CI: Confidence interval; RR: Risk ratio; SMD: Standardised mean difference; MD: Mean difference

## Explanations

- a. Wide confidence intervals
- b.  $\leq 4$  studies to report this outcome
- c.  $I^2 = 94\%$

## Summary of findings:

## Oral health compared to Control in Dysphagia after stroke

Patient or population: Dysphagia after stroke

Setting:

Intervention: Oral health

Comparison: Control

| Outcomes                      | Anticipated absolute effects*<br>(95% CI)       |                                                                | Relative effect<br>(95% CI)      | No of<br>participants<br>(studies)  | Certainty of the<br>evidence<br>(GRADE) | Comments |
|-------------------------------|-------------------------------------------------|----------------------------------------------------------------|----------------------------------|-------------------------------------|-----------------------------------------|----------|
|                               | Risk with<br>Control                            | Risk with Oral<br>health                                       |                                  |                                     |                                         |          |
| Mortality                     | 140 per 1,000                                   | <b>87 per 1,000</b><br>(39 to 193)                             | <b>RR 0.62</b><br>(0.28 to 1.38) | 203<br>(1 RCT)                      | ⊕⊕○○<br>LOW <sup>a,b</sup>              |          |
| Pneumonia                     | 56 per 1,000                                    | <b>8 per 1,000</b><br>(1 to 62)                                | <b>RR 0.14</b><br>(0.02 to 1.11) | 284<br>(4 RCTs)                     | ⊕⊕○○<br>LOW <sup>a,b</sup>              |          |
| OHAT and Oral<br>Index        | -                                               | <b>SMD 1.13 SD<br/>lower</b><br>(2.41 lower to<br>0.14 higher) | -                                | 217<br>(4 RCTs)                     | ⊕○○○<br>VERY LOW <sup>a,b,c</sup>       |          |
| FOIS                          | The mean FOIS<br>was 0                          | <b>MD 2.3 higher</b><br>(1.7 higher to<br>2.9 higher)          | -                                | 43<br>(1 RCT)                       | ⊕⊕⊕○<br>MODERATE <sup>b</sup>           |          |
| Length of stay in<br>hospital | The mean<br>length of stay in<br>hospital was 0 | <b>MD 3.21 lower</b><br>(5.26 lower to<br>1.16 lower)          | -                                | 200<br>(2 observational<br>studies) | ⊕○○○<br>VERY LOW <sup>b</sup>           |          |
| Nasogastric tube              | 1,000 per 1,000                                 | <b>430 per 1,000</b><br>(280 to 650)                           | <b>RR 0.43</b><br>(0.28 to 0.65) | 51<br>(1 RCT)                       | ⊕⊕⊕○<br>MODERATE <sup>b</sup>           |          |

\*The risk in the intervention group (and its 95% confidence interval) is based on the assumed risk in the comparison group and the relative effect of the intervention (and its 95% CI).

CI: Confidence interval; RR: Risk ratio; SMD: Standardised mean difference; MD: Mean difference

## GRADE Working Group grades of evidence

**High certainty:** We are very confident that the true effect lies close to that of the estimate of the effect

**Moderate certainty:** We are moderately confident in the effect estimate: The true effect is likely to be close to the estimate of the effect, but there is a possibility that it is substantially different

**Low certainty:** Our confidence in the effect estimate is limited: The true effect may be substantially different from the estimate of the effect

**Very low certainty:** We have very little confidence in the effect estimate: The true effect is likely to be substantially different from the estimate of effect

## Explanations

a. Wide confidence intervals

b. ≤ 4 studies to report this outcome

c. I<sup>2</sup> = 94%

## 4.5 Pharmacological Interventions

Author(s):

Question: Pharmacology compared to Control for Dysphagia after stroke

Setting:

Bibliography:

| Certainty assessment                     |                   |              |                      |              |                      |                                                  | № of patients    |                  | Effect                 |                                               | Certainty        | Importance |
|------------------------------------------|-------------------|--------------|----------------------|--------------|----------------------|--------------------------------------------------|------------------|------------------|------------------------|-----------------------------------------------|------------------|------------|
| № of studies                             | Study design      | Risk of bias | Inconsistency        | Indirectness | Imprecision          | Other considerations                             | Pharmacology     | Control          | Relative (95% CI)      | Absolute (95% CI)                             |                  |            |
| <b>Mortality</b>                         |                   |              |                      |              |                      |                                                  |                  |                  |                        |                                               |                  |            |
| 13                                       | randomised trials | not serious  | serious <sup>a</sup> | not serious  | serious <sup>b</sup> | none                                             | 690/5364 (12.9%) | 701/5379 (13.0%) | RR 0.94 (0.76 to 1.16) | 8 fewer per 1,000 (from 31 fewer to 21 more)  | ⊕⊕○○<br>LOW      | CRITICAL   |
| <b>Pneumonia</b>                         |                   |              |                      |              |                      |                                                  |                  |                  |                        |                                               |                  |            |
| 11                                       | randomised trials | not serious  | serious <sup>c</sup> | not serious  | not serious          | none                                             | 365/5334 (6.8%)  | 443/5336 (8.3%)  | RR 0.83 (0.73 to 0.94) | 14 fewer per 1,000 (from 22 fewer to 5 fewer) | ⊕⊕⊕○<br>MODERATE | CRITICAL   |
| <b>mRS 4-6</b>                           |                   |              |                      |              |                      |                                                  |                  |                  |                        |                                               |                  |            |
| 3                                        | randomised trials | not serious  | not serious          | not serious  | serious <sup>b</sup> | publication bias strongly suspected <sup>d</sup> | 409/1410 (29.0%) | 429/1415 (30.3%) | RR 0.93 (0.85 to 1.03) | 21 fewer per 1,000 (from 45 fewer to 9 more)  | ⊕⊕○○<br>LOW      | CRITICAL   |
| <b>Swallowing</b>                        |                   |              |                      |              |                      |                                                  |                  |                  |                        |                                               |                  |            |
| 1                                        | randomised trials | not serious  | not serious          | not serious  | not serious          | publication bias strongly suspected <sup>d</sup> | 20/30 (66.7%)    | 11/30 (36.7%)    | RR 1.82 (1.07 to 3.10) | 301 more per 1,000 (from 26 more to 770 more) | ⊕⊕⊕○<br>MODERATE | IMPORTANT  |
| <b>Length of stay</b>                    |                   |              |                      |              |                      |                                                  |                  |                  |                        |                                               |                  |            |
| 4                                        | randomised trials | not serious  | serious <sup>c</sup> | not serious  | serious <sup>e</sup> | publication bias strongly suspected <sup>d</sup> |                  |                  | -                      | MD 0.82 lower (6.84 lower to 5.21 higher)     | ⊕○○○<br>VERY LOW | IMPORTANT  |
| <b>Quality of life, usual activities</b> |                   |              |                      |              |                      |                                                  |                  |                  |                        |                                               |                  |            |
| 1                                        | randomised trials | not serious  | not serious          | not serious  | serious <sup>b</sup> | publication bias strongly suspected <sup>d</sup> | 349/409 (85.3%)  | 364/424 (85.8%)  | RR 0.99 (0.94 to 1.05) | 9 fewer per 1,000 (from 52 fewer to 43 more)  | ⊕⊕○○<br>LOW      | IMPORTANT  |

CI: Confidence interval; RR: Risk ratio; MD: Mean difference

## Explanations

- a. I<sup>2</sup> = 55%
- b. Wide confidence intervals
- c. I<sup>2</sup> ≥ 65%
- d. ≤ 7 studies to report this outcome
- e. Wide confidence intervals

## Summary of findings:

## Pharmacology compared to Control for Dysphagia after stroke

Patient or population: Dysphagia after stroke

Setting:

Intervention: Pharmacology

Comparison: Control

| Outcomes                             | Anticipated absolute effects*<br>(95% CI) |                                                        | Relative effect<br>(95% CI)      | No of<br>participants<br>(studies) | Certainty of the<br>evidence<br>(GRADE) | Comments |
|--------------------------------------|-------------------------------------------|--------------------------------------------------------|----------------------------------|------------------------------------|-----------------------------------------|----------|
|                                      | Risk with<br>Control                      | Risk with<br>Pharmacology                              |                                  |                                    |                                         |          |
| Mortality                            | 130 per 1,000                             | <b>123 per 1,000</b><br>(99 to 151)                    | <b>RR 0.94</b><br>(0.76 to 1.16) | 10743<br>(13 RCTs)                 | ⊕⊕○○<br>LOW <sup>a,b</sup>              |          |
| Pneumonia                            | 83 per 1,000                              | <b>69 per 1,000</b><br>(61 to 78)                      | <b>RR 0.83</b><br>(0.73 to 0.94) | 10670<br>(11 RCTs)                 | ⊕⊕⊕○<br>MODERATE <sup>c</sup>           |          |
| mRS 4-6                              | 303 per 1,000                             | <b>282 per 1,000</b><br>(258 to 312)                   | <b>RR 0.93</b><br>(0.85 to 1.03) | 2825<br>(3 RCTs)                   | ⊕⊕○○<br>LOW <sup>b,d</sup>              |          |
| Swallowing                           | 367 per 1,000                             | <b>667 per 1,000</b><br>(392 to 1,000)                 | <b>RR 1.82</b><br>(1.07 to 3.10) | 60<br>(1 RCT)                      | ⊕⊕⊕○<br>MODERATE <sup>d</sup>           |          |
| Length of stay                       | The mean<br>length of stay<br>was 0       | <b>MD 0.82 lower</b><br>(6.84 lower to<br>5.21 higher) | -                                | (4 RCTs)                           | ⊕○○○<br>VERY LOW <sup>c,d,e</sup>       |          |
| Quality of life,<br>usual activities | 858 per 1,000                             | <b>850 per 1,000</b><br>(807 to 901)                   | <b>RR 0.99</b><br>(0.94 to 1.05) | 833<br>(1 RCT)                     | ⊕⊕○○<br>LOW <sup>b,d</sup>              |          |

\*The risk in the intervention group (and its 95% confidence interval) is based on the assumed risk in the comparison group and the relative effect of the intervention (and its 95% CI).

CI: Confidence interval; RR: Risk ratio; MD: Mean difference

## GRADE Working Group grades of evidence

**High certainty:** We are very confident that the true effect lies close to that of the estimate of the effect

**Moderate certainty:** We are moderately confident in the effect estimate: The true effect is likely to be close to the estimate of the effect, but there is a possibility that it is substantially different

**Low certainty:** Our confidence in the effect estimate is limited: The true effect may be substantially different from the estimate of the effect

**Very low certainty:** We have very little confidence in the effect estimate: The true effect is likely to be substantially different from the estimate of effect

## Explanations

a. I<sup>2</sup> = 55%

b. Wide confidence intervals

c. I<sup>2</sup> ≥ 65%

d. ≤ 7 studies to report this outcome

e. Wide confidence intervals

## 4.6 Neurostimulation Interventions

Author(s):

Question: Neurostimulation compared to Control in Dysphagia after stroke

Setting:

Bibliography:

| Certainty assessment                                     |                   |              |                      |              |                      |                                                  | № of patients    |                | Effect                           |                                                          | Certainty | Importance |
|----------------------------------------------------------|-------------------|--------------|----------------------|--------------|----------------------|--------------------------------------------------|------------------|----------------|----------------------------------|----------------------------------------------------------|-----------|------------|
| № of studies                                             | Study design      | Risk of bias | Inconsistency        | Indirectness | Imprecision          | Other considerations                             | Neurostimulation | Control        | Relative (95% CI)                | Absolute (95% CI)                                        |           |            |
| <b>Mortality, PES - 3 months</b>                         |                   |              |                      |              |                      |                                                  |                  |                |                                  |                                                          |           |            |
| 4                                                        | randomised trials | not serious  | not serious          | not serious  | serious <sup>a</sup> | publication bias strongly suspected <sup>b</sup> | 19/139 (13.7%)   | 13/120 (10.8%) | <b>RR 1.17</b><br>(0.60 to 2.29) | <b>18 more per 1,000</b><br>(from 43 fewer to 140 more)  |           | CRITICAL   |
| <b>mRS</b>                                               |                   |              |                      |              |                      |                                                  |                  |                |                                  |                                                          |           |            |
| 4                                                        | randomised trials | not serious  | serious <sup>c</sup> | not serious  | not serious          | publication bias strongly suspected <sup>b</sup> | 122              | 93             | -                                | <b>MD 0.68 lower</b><br>(1.22 lower to 0.13 lower)       |           | CRITICAL   |
| <b>Pneumonia</b>                                         |                   |              |                      |              |                      |                                                  |                  |                |                                  |                                                          |           |            |
| 5                                                        | randomised trials | not serious  | not serious          | not serious  | serious <sup>a</sup> | publication bias strongly suspected <sup>b</sup> | 22/186 (11.8%)   | 32/181 (17.7%) | <b>RR 0.70</b><br>(0.45 to 1.09) | <b>53 fewer per 1,000</b><br>(from 97 fewer to 16 more)  |           | CRITICAL   |
| <b>OVERALL, Dysphagia, Improvement</b>                   |                   |              |                      |              |                      |                                                  |                  |                |                                  |                                                          |           |            |
| 44                                                       | randomised trials | not serious  | serious <sup>d</sup> | not serious  | not serious          | none                                             | 820              | 621            | -                                | <b>SMD 88 SD higher</b><br>(0.64 higher to 1.12 higher)  |           | CRITICAL   |
| <b>LOS</b>                                               |                   |              |                      |              |                      |                                                  |                  |                |                                  |                                                          |           |            |
| 4                                                        | randomised trials | not serious  | not serious          | not serious  | serious <sup>e</sup> | publication bias strongly suspected <sup>b</sup> | 137              | 114            | -                                | <b>MD 1.19 lower</b><br>(7.35 lower to 4.97 higher)      |           | IMPORTANT  |
| <b>QoL, Anxiety, Depression - Swallowing QoL, Change</b> |                   |              |                      |              |                      |                                                  |                  |                |                                  |                                                          |           |            |
| 3                                                        | randomised trials | not serious  | not serious          | not serious  | not serious          | publication bias strongly suspected <sup>b</sup> | 67               | 39             | -                                | <b>MD 18.02 higher</b><br>(11.41 higher to 24.63 higher) |           | IMPORTANT  |

CI: Confidence interval; RR: Risk ratio; MD: Mean difference; SMD: Standardised mean difference



## Explanations

- a. Few events and wide confidence intervals
- b. Seven or less studies to support this outcome
- c. I2 = 62%
- d. I2 = ≥75%
- e. Wide confidence intervals

### Summary of findings:

## Neurostimulation compared to Control in Dysphagia after stroke

**Patient or population:** Dysphagia after stroke

**Setting:**

**Intervention:** Neurostimulation

**Comparison:** Control

| Outcomes                                          | Anticipated absolute effects* (95% CI)                           |                                                          | Relative effect (95% CI)         | № of participants (studies) | Certainty of the evidence (GRADE) | Comments |
|---------------------------------------------------|------------------------------------------------------------------|----------------------------------------------------------|----------------------------------|-----------------------------|-----------------------------------|----------|
|                                                   | Risk with Control                                                | Risk with Neurostimulation                               |                                  |                             |                                   |          |
| Mortality, PES - 3 months                         | 108 per 1,000                                                    | <b>127 per 1,000</b><br>(65 to 248)                      | <b>RR 1.17</b><br>(0.60 to 2.29) | 259<br>(4 RCTs)             | ⊕⊕○○<br>LOW <sup>ab</sup>         |          |
| mRS                                               | The mean mRS was 0                                               | <b>MD 0.68 lower</b><br>(1.22 lower to 0.13 lower)       | -                                | 215<br>(4 RCTs)             | ⊕⊕○○<br>LOW <sup>bc</sup>         |          |
| Pneumonia                                         | 177 per 1,000                                                    | <b>124 per 1,000</b><br>(80 to 193)                      | <b>RR 0.70</b><br>(0.45 to 1.09) | 367<br>(5 RCTs)             | ⊕⊕○○<br>LOW <sup>ab</sup>         |          |
| OVERALL, Dysphagia, Improvement                   | -                                                                | <b>SMD 88 SD higher</b><br>(0.64 higher to 1.12 higher)  | -                                | 1441<br>(44 RCTs)           | ⊕⊕⊕○<br>MODERATE <sup>d</sup>     |          |
| LOS                                               | The mean LOS was 0                                               | <b>MD 1.19 lower</b><br>(7.35 lower to 4.97 higher)      | -                                | 251<br>(4 RCTs)             | ⊕⊕○○<br>LOW <sup>be</sup>         |          |
| QoL, Anxiety, Depression - Swallowing QoL, Change | The mean qoL, Anxiety, Depression - Swallowing QoL, Change was 0 | <b>MD 18.02 higher</b><br>(11.41 higher to 24.63 higher) | -                                | 106<br>(3 RCTs)             | ⊕⊕⊕○<br>MODERATE <sup>b</sup>     |          |

\*The risk in the intervention group (and its 95% confidence interval) is based on the assumed risk in the comparison group and the **relative effect** of the intervention (and its 95% CI).

CI: Confidence interval; RR: Risk ratio; MD: Mean difference; SMD: Standardised mean difference

### GRADE Working Group grades of evidence

**High certainty:** We are very confident that the true effect lies close to that of the estimate of the effect

**Moderate certainty:** We are moderately confident in the effect estimate: The true effect is likely to be close to the estimate of the effect, but there is a possibility that it is substantially different

**Low certainty:** Our confidence in the effect estimate is limited: The true effect may be substantially different from the estimate of the effect

**Very low certainty:** We have very little confidence in the effect estimate: The true effect is likely to be substantially different from the estimate of effect

## Explanations

- a. Few events and wide confidence intervals
- b. Seven or less studies to support this outcome
- c.  $I^2 = 62\%$
- d.  $I^2 = \geq 75\%$
- e. Wide confidence intervals
